# Supplementary material for: Identification of mitophagy-related biomarkers in human osteoporosis based on a machine learning model
Source: Front Physiol. 2024 Jan 8;14:1289976. doi: 10.3389/fphys.2023.1289976 (PMC10800828; doi:10.3389/fphys.2023.1289976)
Supplement: Supplementary file 1 [file Table2.XLSX]

## Sheet: NELFB_GO
ONTOLOGY	ID	Description	setSize	enrichmentScore	NES	pvalue	p.adjust	qvalue	rank	leading_edge	core_enrichment
CC	GO:0022625	cytosolic large ribosomal subunit	51	-0.675808	-2.78235	1e-10	8.52889e-08	7.45146e-08	1045	tags=49%, list=8%, signal=45%	6125/6122/140801/6175/6135/6141/9045/6169/23521/6136/6137/6142/6133/6128/6166/6130/6160/6138/6171/6124/6152/6129/6146/6147/9349
CC	GO:0022626	cytosolic ribosome	89	-0.603993	-2.74568	1e-10	8.52889e-08	7.45146e-08	1562	tags=46%, list=12%, signal=41%	6223/51121/6194/6208/6125/6122/6227/140801/6175/6235/6135/6141/9045/6169/23521/6136/6137/6142/6133/6206/6128/6188/6230/6205/3921/6166/6130/6160/6138/6171/6124/6189/6191/6152/6229/6210/6187/6129/6146/6147/9349
BP	GO:0002181	cytoplasmic translation	136	-0.549114	-2.6965	1e-10	8.52889e-08	7.45146e-08	1934	tags=46%, list=15%, signal=40%	8562/6164/8891/6217/8894/6223/1975/51121/6194/1660/1968/6208/2107/6125/6122/6227/4690/6451/6175/6235/6135/6141/8669/9045/64506/28985/8664/6169/23521/2332/6136/6137/6142/6133/6206/6128/6188/10480/6230/6205/3921/51611/1983/6130/6160/6138/6171/6124/6189/6191/22916/51386/6152/6229/1974/6210/6187/6129/3646/6146/8667/6147/9349
MF	GO:0003735	structural constituent of ribosome	131	-0.540419	-2.63009	1e-10	8.52889e-08	7.45146e-08	1731	tags=45%, list=13%, signal=40%	10240/6217/55133/9801/6223/51121/6194/6208/65080/60488/55052/6125/51021/6122/6227/140801/6175/6235/4701/6135/6141/29074/9045/11222/29093/6169/23521/63931/6136/6137/6142/6133/6206/6128/6188/78988/6230/6205/3921/6166/56945/6130/7818/6160/6138/6171/6124/28977/51187/6189/6191/6152/6229/6210/6187/6129/6146/6147/9349
CC	GO:0005840	ribosome	165	-0.488338	-2.47534	1e-10	8.52889e-08	7.45146e-08	1731	tags=40%, list=13%, signal=35%	10240/6217/8939/9801/6223/51121/6194/1660/6208/51182/65080/60488/55052/6125/51021/6122/6227/4690/140801/6175/6235/4701/6135/6141/29074/9045/11222/29093/55037/6169/23521/63931/6136/6137/6142/6133/6206/6128/689/6188/78988/6230/6205/3921/6166/56945/6130/7818/6160/6138/6171/6124/28977/51187/6189/6191/4869/6152/6229/6210/6187/6129/6146/8667/6147/9349
CC	GO:0044391	ribosomal subunit	144	-0.489168	-2.40911	1e-10	8.52889e-08	7.45146e-08	1731	tags=40%, list=13%, signal=35%	10240/6217/9801/6223/51121/6194/6208/65080/60488/55052/6125/51021/6122/6227/140801/6175/6235/6135/6141/29074/9045/11222/29093/55037/6169/23521/63931/6136/6137/6142/6133/6206/6128/6188/78988/6230/6205/3921/6166/56945/6130/7818/6160/6138/6171/6124/28977/6189/6191/4869/6152/6229/6210/6187/6129/6146/6147/9349
BP	GO:0042254	ribosome biogenesis	235	-0.423936	-2.24953	1e-10	8.52889e-08	7.45146e-08	1722	tags=36%, list=13%, signal=32%	6217/8780/8850/23404/10436/6223/4931/51121/5901/10969/6194/55164/4927/8450/51106/2091/10813/1662/6208/25983/7514/55661/65080/112479/11157/55272/55052/55759/6125/55299/10200/11056/6227/51001/55035/29889/54680/26156/140801/6175/2752/404672/11103/6135/11340/9045/29093/10412/22868/55781/6059/10557/6169/51018/5393/55813/80135/9221/2483/51068/6128/27292/10775/8451/25926/6230/3921/10199/9188/6130/9326/8…
BP	GO:0022613	ribonucleoprotein complex biogenesis	357	-0.395513	-2.20808	1e-10	8.52889e-08	7.45146e-08	1722	tags=34%, list=13%, signal=30%	6217/8780/8850/8894/23404/10436/6629/6223/4931/1975/51121/5901/10969/6194/51340/55164/4927/1660/8450/51106/2091/10813/8559/1662/1968/6208/25983/10659/7514/55661/65080/112479/11157/55272/55052/55759/6125/9733/55299/10200/11056/6227/51001/55035/29889/58155/54680/26156/140801/6175/2752/404672/545/11103/6135/11340/8669/11168/1653/1207/9045/96764/29093/472/10412/22868/28985/91746/55781/6634/6059/8664/…
BP	GO:0006412	translation	490	-0.327424	-1.87578	1e-10	8.52889e-08	7.45146e-08	2242	tags=33%, list=17%, signal=29%	10987/65981/10884/54542/60558/10492/54505/4691/23107/6093/5997/29063/23173/51650/55278/51067/10131/1967/8562/10128/55140/6164/54901/8891/55024/5073/10240/6217/201626/27257/8894/23404/55133/9801/10352/10600/6223/1975/51121/9475/79068/57038/6194/1660/8892/1968/28958/6208/10973/1977/9521/25983/23369/29883/65080/60488/79072/55052/2107/6125/51021/6122/8507/6227/4690/10643/406991/253943/4116/6451/6197/…
BP	GO:0006364	rRNA processing	173	-0.414819	-2.11439	2.9167e-09	2.23886e-06	1.95603e-06	1722	tags=35%, list=13%, signal=31%	6217/8780/8850/23404/10436/6223/4931/10969/6194/55164/51106/2091/10813/1662/6208/25983/55661/65080/112479/11157/55272/55759/6125/55299/10200/11056/6227/55035/54680/26156/404672/11103/6135/11340/9045/10412/55781/10557/51018/5393/55813/80135/9221/2483/27292/10775/25926/6230/10199/9188/6130/9326/8886/92342/10556/5303/51077/55127/10885/6229/6129
BP	GO:0022411	cellular component disassembly	383	0.372948	1.84379	5.52388e-09	3.85466e-06	3.36772e-06	2420	tags=32%, list=18%, signal=27%	8289/1639/8751/8878/7249/64780/57192/6604/23399/101/8775/706/7040/6601/79643/5119/6597/1471/10226/55201/11337/11152/2314/1201/9181/7157/4778/832/6709/7124/23400/6603/27183/4035/3159/84164/58526/6455/22985/11344/26100/9645/57104/2580/1072/6721/26993/6749/6602/822/23647/10211/327/118/3297/23192/2934/2931/1845/10300/6811/27341/79065/23130/488/3831/11140/5976/11331/5499/8408/9922/1020/6598/91782/1004…
BP	GO:0034470	ncRNA processing	305	-0.346598	-1.89452	6.09782e-09	3.90057e-06	3.40783e-06	1971	tags=32%, list=15%, signal=28%	51575/11137/55140/54901/6894/5073/10269/6217/8780/8850/652/23404/10436/6223/4931/11062/10969/6194/55164/1787/51106/2091/10813/1662/6208/25983/23369/55661/65080/112479/11157/55272/25821/11102/4087/55759/6125/55299/55596/10200/11056/60487/6227/55035/54680/26156/6741/404672/84705/11103/54802/51574/6135/11340/1653/9045/7247/55511/10412/55781/57117/10557/51018/5393/8846/55813/9836/3181/80135/9221/2483…
CC	GO:0015934	large ribosomal subunit	87	-0.515594	-2.33899	7.14922e-09	4.22134e-06	3.68807e-06	1170	tags=38%, list=9%, signal=35%	65080/55052/6125/6122/140801/6175/6135/6141/29074/9045/11222/29093/6169/23521/6136/6137/6142/6133/6128/78988/6166/6130/6160/6138/6171/6124/28977/4869/6152/6129/6146/6147/9349
CC	GO:0015629	actin cytoskeleton	393	0.365209	1.81116	8.49986e-09	4.66035e-06	4.07163e-06	2684	tags=31%, list=20%, signal=25%	64236/2316/254102/2319/9260/81/2268/7791/64780/57175/101/1729/5829/4627/11151/399687/11337/2314/25/3055/51734/5880/4542/7408/832/6709/7171/60/10121/87/6714/10163/6455/11344/226/3611/1072/9051/4046/3059/440915/23406/822/1265/3728/147179/7454/5914/10211/118/10602/4650/2934/10093/23307/274/29109/10120/9817/10634/9578/7205/9948/50807/23164/10540/2011/4640/23433/3927/23094/29780/9344/9368/79784/6525/2…
BP	GO:0007015	actin filament organization	343	0.371946	1.82121	3.2724e-08	1.67459e-05	1.46305e-05	2936	tags=35%, list=22%, signal=28%	2185/5339/2316/5580/7791/64780/57175/391/1729/5829/11151/2314/25/9181/253980/5987/3055/51734/5216/5880/4542/7408/832/6709/7171/65108/87/6714/10163/11344/9645/226/116985/1072/9051/3636/3059/23406/822/23647/9647/7454/118/10602/2934/408/10093/388/29108/6548/7016/274/63916/51466/29109/55114/10634/9948/54961/3092/79767/23164/79585/4640/10435/389/10174/54434/4088/201191/6369/9844/23580/3071/4082/5879/7…
BP	GO:0051235	maintenance of location	274	0.383014	1.84215	9.97505e-08	4.78553e-05	4.18099e-05	1829	tags=26%, list=14%, signal=23%	2185/2316/5777/5905/57192/2548/207/28952/1729/706/25792/10956/4792/11151/10226/4793/55630/25/920/8985/7124/10938/7376/5371/7529/11344/8943/57104/6721/7226/80024/6280/5566/2934/8694/811/2512/10945/550/2280/9817/26580/10523/3098/5335/1020/4794/4790/11014/54923/3064/2946/309/2812/22821/4067/6261/2867/3596/3934/8733/5027/9641/6777/6348/3954/3073/65018/4188/5031/25777
BP	GO:0050867	positive regulation of cell activation	337	0.361901	1.77267	1.16999e-07	5.0294e-05	4.39405e-05	1787	tags=25%, list=14%, signal=22%	3727/8289/2316/2319/5777/2268/6604/207/101/1050/6778/7040/6601/9466/7297/3689/6597/11151/25/920/11027/1445/140885/7124/6603/6195/23149/60/11006/4615/6714/57178/10859/3635/8943/54440/3135/51043/6850/975/6602/3566/5914/3561/177/2309/29108/10326/1947/3965/3105/8764/6598/3707/148022/79155/8741/30835/972/864/3718/3133/6599/572/7293/56848/2812/1026/4067/2048/3596/604/3134/55626/6777/63925/64109/3916/74…
BP	GO:0006914	autophagy	415	0.349838	1.7455	1.2449e-07	5.0294e-05	4.39405e-05	2526	tags=33%, list=19%, signal=28%	7942/9146/826/8878/7249/1509/57192/2548/207/10312/10287/706/5768/23339/79643/5119/10273/55201/11337/11152/1981/25/5127/1201/5987/7157/79735/10548/79720/527/23400/27183/738/6714/5476/6829/51322/26100/3162/6721/823/23241/9842/23265/2033/23647/51160/81876/6280/6625/5566/23192/56834/5595/8897/2309/54472/2931/10919/9114/29108/79065/23130/3607/488/550/11140/5660/57154/9817/1613/11331/11180/8408/9681/33…
BP	GO:0061919	process utilizing autophagic mechanism	415	0.349838	1.7455	1.2449e-07	5.0294e-05	4.39405e-05	2526	tags=33%, list=19%, signal=28%	7942/9146/826/8878/7249/1509/57192/2548/207/10312/10287/706/5768/23339/79643/5119/10273/55201/11337/11152/1981/25/5127/1201/5987/7157/79735/10548/79720/527/23400/27183/738/6714/5476/6829/51322/26100/3162/6721/823/23241/9842/23265/2033/23647/51160/81876/6280/6625/5566/23192/56834/5595/8897/2309/54472/2931/10919/9114/29108/79065/23130/3607/488/550/11140/5660/57154/9817/1613/11331/11180/8408/9681/33…
CC	GO:0031252	cell leading edge	351	0.35708	1.75167	2.12022e-07	8.1374e-05	7.10943e-05	2403	tags=28%, list=18%, signal=24%	23625/2185/23550/5034/2319/1639/10347/9260/6282/6277/2268/57175/207/8525/51177/1729/5829/4627/3678/11151/7431/25/9181/7094/5880/7408/832/23396/60/87/9780/6714/10163/1785/29959/11344/10381/23129/3611/1072/9051/3636/208/822/23647/10211/8861/4650/2934/7283/6548/7016/51466/960/50855/5335/1020/9578/10235/8543/28964/55198/54869/54434/29780/9368/3756/10013/6810/54518/54828/1500/2550/5879/70/747/4985/839…
BP	GO:0016072	rRNA metabolic process	199	-0.361099	-1.86358	2.46623e-07	9.01466e-05	7.87587e-05	1722	tags=32%, list=13%, signal=28%	6217/8780/8850/23404/10436/6223/4931/10969/6194/55164/51106/2091/10813/1662/6208/25983/55661/65080/112479/11157/55272/55759/6125/55299/10200/64425/11056/6227/55035/54680/26156/404672/11103/6135/11340/9045/10412/55781/10557/51018/5393/9330/55813/80135/9221/2483/27292/10775/25926/6230/10199/9188/6130/9326/8886/92342/10556/5303/51077/55127/10885/6229/6129
BP	GO:0042273	ribosomal large subunit biogenesis	61	-0.539263	-2.31652	2.83512e-07	9.88927e-05	8.63999e-05	1542	tags=44%, list=12%, signal=39%	4931/51121/10969/55052/55759/6125/55299/54680/26156/140801/6175/6135/9045/10412/22868/6169/51018/80135/6128/6130/9326/8886/51187/4869/6152/6129/6147
MF	GO:0051015	actin filament binding	177	0.424318	1.93763	2.96317e-07	9.88927e-05	8.63999e-05	2490	tags=33%, list=19%, signal=27%	5339/2316/81/64780/57175/4627/11151/55201/399687/2314/25/752/7094/4542/832/6709/7171/65108/87/11344/1072/9051/3059/23406/822/118/4650/2934/10093/274/29109/10634/9948/3092/23164/64601/79585/4640/3927/309/79784/201191/7464/4624/6876/4082/7169/9463/80179/59341/7134/1627/25794/50853/79778/83715/10095/7125
CC	GO:0042581	specific granule	137	0.45384	1.99979	3.64417e-07	0.000116553	0.000101829	2210	tags=37%, list=17%, signal=31%	5777/311/11322/6813/1509/3683/124583/101/5768/5199/3689/221/6793/6709/7133/9725/10970/7226/8514/1265/3728/10555/23250/3903/8694/54472/138050/9761/8993/3163/10043/4790/4758/64386/8566/1991/7077/79792/671/3934/4069/5023/5004/6810/26/1116/11001/10855/23352/5329/6590
BP	GO:1903039	positive regulation of leukocyte cell-cell adhesion	243	0.390076	1.86298	4.64746e-07	0.000142695	0.000124669	1845	tags=28%, list=14%, signal=24%	8289/2319/5777/6604/207/101/6601/9466/7297/3689/6597/11151/25/920/1445/240/140885/7124/6603/23149/60/11006/6714/57178/10859/8943/54440/5970/3135/51043/6850/975/6602/3566/5914/3561/177/2309/29108/10326/3654/960/1947/3965/3105/8764/6598/3707/30835/972/864/3718/3133/6599/572/1991/9435/4067/604/55626/6777/7409/9092/3071/1725/10524/2529
CC	GO:0001931	uropod	12	0.874158	2.24647	6.75847e-07	0.000192141	0.000167868	686	tags=58%, list=5%, signal=55%	2319/4627/4478/23396/9051/6404/10211
CC	GO:0031254	cell trailing edge	12	0.874158	2.24647	6.75847e-07	0.000192141	0.000167868	686	tags=58%, list=5%, signal=55%	2319/4627/4478/23396/9051/6404/10211
BP	GO:0002696	positive regulation of leukocyte activation	322	0.358657	1.75123	7.11127e-07	0.00019495	0.000170323	1787	tags=25%, list=14%, signal=22%	3727/8289/2319/5777/2268/6604/207/101/1050/6778/7040/6601/9466/7297/3689/6597/11151/25/920/1445/140885/7124/6603/23149/60/11006/4615/6714/57178/10859/3635/8943/54440/3135/51043/6850/975/6602/3566/5914/3561/177/2309/29108/10326/1947/3965/3105/8764/6598/3707/148022/79155/8741/30835/972/864/3718/3133/6599/572/7293/56848/1026/4067/2048/3596/604/3134/55626/6777/63925/64109/3916/7409/9092/6348/3071/681…
CC	GO:0030027	lamellipodium	170	0.41972	1.90675	8.40526e-07	0.000222479	0.000194374	2737	tags=37%, list=21%, signal=30%	23625/2185/5034/2319/57175/207/8525/5829/11151/5880/7408/832/60/9780/10163/1785/29959/11344/10381/23129/3611/1072/9051/3636/822/10211/4650/2934/6548/7016/51466/960/5335/1020/9578/28964/54434/29780/6810/54518/1500/5879/70/8394/10458/1969/8936/25876/59341/59/1627/5881/72/4771/23513/23616/54997/10297/5058/8572/6624/10094/11075
BP	GO:0007159	leukocyte cell-cell adhesion	348	0.34974	1.7151	8.78585e-07	0.000224801	0.000196402	1787	tags=24%, list=14%, signal=21%	8289/2319/5777/6604/3683/10318/207/101/6601/9466/7297/3689/3678/6597/11151/4478/6793/25/920/5880/1445/240/140885/7124/6603/23149/60/11006/6714/57178/10859/8943/54440/3695/5970/3135/51043/6850/975/6602/3566/6404/5914/6280/3561/177/9314/2309/1845/80762/29108/1051/10326/3654/960/1947/3965/3105/8764/6598/3707/30835/972/864/3718/3133/6599/572/1991/10507/9435/4067/8379/3383/604/3958/3659/55626/6777/740…
BP	GO:0022409	positive regulation of cell-cell adhesion	281	0.365127	1.76429	9.7388e-07	0.000239731	0.000209446	1787	tags=25%, list=14%, signal=22%	8289/2319/5777/6604/207/101/10370/6601/9466/7297/3689/6597/11151/25/920/1445/240/140885/7124/6603/23149/60/11006/9780/6714/57178/10859/8943/54440/5970/3135/51043/6850/975/6602/3566/5914/10211/3561/177/2309/29108/10326/3654/960/1947/3965/3105/8764/6598/3707/30835/972/864/3718/3133/6599/572/1991/9435/4067/604/55626/6777/7409/9092/3071/1725/10524
MF	GO:0140297	DNA-binding transcription factor binding	405	0.335958	1.67254	9.99398e-07	0.000239731	0.000209446	2571	tags=30%, list=19%, signal=25%	3727/8289/2316/10014/81/6604/1616/9112/26155/1050/6881/6688/51341/10370/1487/4792/6597/6256/5585/7157/2288/7392/9968/7376/3159/60/10474/6714/23558/1460/602/5970/11176/3059/2033/79447/3728/1877/118/8861/3297/7709/9314/811/4005/25855/10025/3164/64784/1051/23468/5089/11240/9049/9150/9817/1613/11331/4209/8553/3054/10634/28996/3315/6598/8904/7205/8543/405/7027/54880/2002/1869/4088/81857/604/4772/6667/…
BP	GO:0019221	cytokine-mediated signaling pathway	408	0.333389	1.66503	1.19768e-06	0.000278588	0.000243395	2869	tags=30%, list=22%, signal=25%	2185/5034/5777/81/23765/28511/207/1050/6778/1441/6688/3570/9466/4792/7297/79168/920/7157/3055/11027/3661/2874/7124/8986/7376/2950/11006/4615/6714/10859/1460/11025/7133/3611/5970/6850/10554/3665/3566/10555/3561/5566/5595/59307/2309/54472/1796/29108/6776/11140/11024/3654/11240/960/3663/8764/58509/10019/8904/79155/3579/1271/5355/2207/972/3718/572/7293/3551/55198/1436/51094/4067/23170/3659/9641/6369/…
BP	GO:0071826	ribonucleoprotein complex subunit organization	175	-0.365833	-1.87182	1.30773e-06	0.000278838	0.000243613	1641	tags=32%, list=12%, signal=28%	8894/6629/6223/1975/51340/55164/1660/8559/1968/6208/10659/3799/55052/6125/9733/55299/58155/54680/140801/6175/545/6135/8669/11168/1653/79752/1207/96764/472/22868/28985/91746/6634/8664/6169/23521/10772/6426/6128/10480/6733/3921/8487/9879/1983/9326/7520/6430/11051/6936/23451/51386/6152/3646/8667/6147
CC	GO:0005774	vacuolar membrane	336	0.348971	1.70884	1.27086e-06	0.000278838	0.000243613	2641	tags=34%, list=20%, signal=28%	7942/7317/2783/23646/1509/57192/2548/10312/11182/1441/23339/79643/5119/2896/11337/1497/79803/1186/1201/537/968/161/23334/51296/10548/527/23400/27183/4035/2647/5476/23207/7529/10948/8943/9725/10970/1175/7226/9842/10211/23385/23250/56834/408/9114/138050/26001/6396/5660/215/20/2782/8408/9681/8904/91782/1211/10043/1173/55652/4758/2767/9145/972/535/155066/64601/162/55361/51368/56848/221960/79888/1889/…
MF	GO:0003779	actin binding	348	0.347387	1.70356	1.3006e-06	0.000278838	0.000243613	2365	tags=26%, list=18%, signal=22%	64236/5339/2316/5034/9260/81/64780/57175/53827/1729/4627/11151/4478/55201/399687/2314/25/752/51734/5216/7094/4542/7408/832/6709/7171/65108/87/10163/11344/9645/226/9275/1072/9051/3636/4046/3059/23406/822/1265/147179/7454/118/4650/2934/10093/23307/274/51466/29109/10634/9948/23623/54961/3092/23164/64601/79585/4640/3927/54869/54434/309/29780/79784/6525/201191/7464/10013/4624/6876/4082/7139/7169/9463/…
BP	GO:0006413	translational initiation	100	-0.444846	-2.06502	1.77013e-06	0.000357565	0.000312395	2375	tags=44%, list=18%, signal=36%	8665/9669/10987/54505/1967/8562/8891/55024/8894/1975/8892/1968/1977/4690/253943/6451/6198/5436/8669/1653/28969/4528/28985/6059/8664/8872/23521/2332/8846/1965/1617/10959/6188/10480/9689/9470/1983/6189/4869/22916/51386/1974/3646/8667
BP	GO:0050900	leukocyte migration	339	0.349923	1.71442	1.75554e-06	0.000357565	0.000312395	3294	tags=35%, list=25%, signal=27%	2185/5339/23765/63940/3683/207/101/391/1441/6688/3570/9466/3689/4627/11151/4478/6793/25/3055/5880/240/140885/7124/51157/23396/682/4615/728/6714/3695/3162/79890/7226/6850/975/80024/4267/6404/1265/6280/177/5595/811/29108/3603/11240/3965/8764/3579/9948/4814/2207/972/1991/5293/1436/7423/9435/4067/2867/3383/3958/6369/6777/1113/566/7409/6348/3071/4354/2155/613/2529/5879/9048/7422/947/84830/1230/59341/3…
BP	GO:0051251	positive regulation of lymphocyte activation	284	0.36202	1.75071	1.98905e-06	0.000391486	0.000342031	1787	tags=25%, list=14%, signal=22%	8289/2319/5777/6604/207/101/6778/7040/6601/9466/7297/6597/11151/25/920/1445/140885/6603/23149/60/11006/4615/6714/57178/10859/3635/8943/54440/3135/51043/6850/975/6602/3566/5914/3561/177/2309/29108/10326/1947/3965/3105/8764/6598/3707/148022/79155/8741/30835/972/864/3718/3133/6599/572/7293/1026/4067/2048/3596/604/3134/55626/6777/63925/3916/7409/9092/3071/1725/10524
BP	GO:0022618	ribonucleoprotein complex assembly	167	-0.372489	-1.88575	2.04609e-06	0.000392646	0.000343044	1641	tags=32%, list=12%, signal=29%	8894/6629/6223/1975/51340/55164/1660/8559/1968/6208/10659/55052/6125/9733/55299/58155/54680/140801/6175/545/6135/8669/11168/1653/1207/96764/472/22868/28985/91746/6634/8664/6169/23521/10772/6426/6128/10480/6733/3921/8487/9879/1983/9326/7520/6430/11051/6936/23451/51386/6152/3646/8667/6147
MF	GO:0019843	rRNA binding	52	-0.550281	-2.27182	2.17831e-06	0.000399701	0.000349208	2939	tags=58%, list=22%, signal=45%	6203/51023/56342/65003/4193/283/60493/23107/10436/6208/55272/55052/6125/55299/6122/6175/6135/29074/55037/22868/6136/80135/6133/6188/6205/9188/6191/4869/6147/9349
BP	GO:0030099	myeloid cell differentiation	327	0.351686	1.71821	2.187e-06	0.000399701	0.000349208	3058	tags=36%, list=23%, signal=28%	2185/2316/4055/23218/5777/2539/2242/1050/10312/1441/6688/51341/10370/22904/7040/4792/4627/920/537/10320/3726/7124/11006/87/6714/10163/5371/22985/10859/5971/11025/10365/3635/3059/975/3665/2033/7538/5914/8861/3297/8314/56834/7030/2309/54681/80762/677/54623/1051/2101/28996/10019/3707/9948/405/972/3718/1053/10538/51621/5293/1436/2812/7067/4067/2194/604/1777/6777/211/51327/6348/3071/2068/10766/3624/74…
BP	GO:0045785	positive regulation of cell adhesion	418	0.333302	1.66321	2.23912e-06	0.000399709	0.000349215	2006	tags=23%, list=15%, signal=20%	2185/8289/2316/5034/2319/5777/25865/6604/207/101/10370/6601/9466/7297/3689/3678/6597/11151/25/920/1445/240/140885/7124/6603/23149/60/11006/9780/6714/1785/57178/10859/8943/54440/3611/5970/3135/51043/6850/975/6602/3566/9647/3728/5914/10211/8861/3561/177/7030/2309/811/29108/7016/10326/3654/960/1947/3965/3105/8764/26073/6598/3707/30835/972/864/3718/3133/6599/572/1991/4088/9435/4067/604/463/55626/6237…
BP	GO:0002694	regulation of leukocyte activation	489	0.317264	1.60427	2.87246e-06	0.000501114	0.00043781	1809	tags=22%, list=14%, signal=20%	3727/8289/2319/5777/6813/1209/2268/6604/2242/207/101/678/1050/6778/6688/7040/6601/9466/2896/7297/3689/6597/11151/5585/399687/25/920/5880/1445/140885/3726/7124/6603/23149/60/11006/4615/6830/90379/6714/57178/10859/3635/8943/7133/54440/3162/3135/51043/6850/975/6602/3566/5914/3561/177/2309/1845/80762/677/29108/25807/1051/10326/1947/3965/3105/8764/8993/6598/3707/148022/79155/8741/30835/972/864/3718/95…
BP	GO:0002685	regulation of leukocyte migration	198	0.392852	1.8211	3.0365e-06	0.000506699	0.000442689	2200	tags=28%, list=17%, signal=24%	2185/63940/207/101/391/6688/3570/9466/11151/4478/6793/25/5880/7124/51157/4615/728/3162/79890/975/80024/4267/1265/177/5595/811/29108/11240/3965/8764/3579/972/1991/1436/7423/9435/4067/3383/3958/6369/6348/3071/4354/2155/613/2529/5879/7422/84830/1230/59341/3204/79647/27202/11314
BP	GO:0022407	regulation of cell-cell adhesion	406	0.331519	1.65269	2.99824e-06	0.000506699	0.000442689	2777	tags=30%, list=21%, signal=24%	8289/2319/5777/5580/6604/207/101/53827/6688/10370/7040/6601/9466/7297/3689/6597/11151/25/920/1445/240/140885/7124/6603/50488/23149/60/11006/9780/6714/57178/10859/8943/54440/5970/3135/51043/6850/975/6602/3566/9647/5914/10211/3561/177/9314/2309/1845/80762/29108/4155/1051/10326/3654/960/1947/4855/3965/3105/8764/10019/6598/3707/5598/30835/972/864/3718/3133/6599/572/1991/9435/4067/8379/55714/604/3958/…
CC	GO:0015935	small ribosomal subunit	61	-0.510126	-2.19135	3.1555e-06	0.000515353	0.00045025	2103	tags=46%, list=16%, signal=39%	54505/23107/51650/10240/6217/6223/6194/6208/60488/51021/6227/6235/55037/63931/6206/6188/6230/6205/3921/56945/7818/28977/6189/6191/4869/6229/6210/6187
CC	GO:0070820	tertiary granule	139	0.430525	1.89666	3.7306e-06	0.00057712	0.000504214	2289	tags=35%, list=17%, signal=29%	23218/5777/11322/6813/1509/2548/124583/101/10312/1729/5768/5199/3689/1471/161/140885/6709/527/226/9725/7226/8514/79930/1265/23250/3903/138050/1476/8993/6556/2207/978/535/3687/7077/79792/4069/3958/3916/5004/3071/5879/10288/1512/23352/11314/4318/5646
BP	GO:0006909	phagocytosis	212	0.38239	1.78868	3.9848e-06	0.00057712	0.000504214	2123	tags=28%, list=16%, signal=24%	10347/311/5580/2268/3683/391/5199/3689/4627/11151/399687/25/1201/3055/5880/1445/140885/7124/23396/4035/4615/6714/1785/6850/1265/5914/3561/2934/4689/811/29108/63916/8291/3385/10326/9777/6556/5338/2207/79767/1053/1991/55113/55198/4067/5027/7879/9844/566/7409/2219/3071/5031/7410/613/5879/8394/7305/8877/949
BP	GO:0050870	positive regulation of T cell activation	220	0.376096	1.76634	3.8229e-06	0.00057712	0.000504214	1787	tags=26%, list=14%, signal=23%	8289/2319/5777/6604/207/101/6601/9466/7297/6597/11151/25/920/1445/140885/6603/23149/60/11006/6714/57178/10859/8943/54440/3135/51043/6850/975/6602/3566/5914/3561/177/2309/29108/10326/1947/3965/3105/8764/6598/3707/30835/972/864/3718/3133/6599/572/4067/604/55626/6777/7409/9092/3071/1725/10524
CC	GO:0005765	lysosomal membrane	309	0.353028	1.72188	3.89475e-06	0.00057712	0.000504214	2174	tags=30%, list=16%, signal=26%	7942/7317/2783/23646/1509/57192/2548/10312/11182/1441/23339/79643/5119/2896/1497/79803/1186/1201/537/968/161/23334/51296/10548/527/23400/4035/2647/5476/23207/10948/8943/9725/10970/1175/7226/9842/10211/23385/23250/56834/408/9114/138050/26001/6396/5660/215/20/2782/9681/8904/91782/1211/10043/1173/55652/4758/2767/9145/972/535/155066/64601/162/55361/56848/221960/79888/1889/309/29988/967/9296/4067/3134…
CC	GO:0098852	lytic vacuole membrane	309	0.353028	1.72188	3.89475e-06	0.00057712	0.000504214	2174	tags=30%, list=16%, signal=26%	7942/7317/2783/23646/1509/57192/2548/10312/11182/1441/23339/79643/5119/2896/1497/79803/1186/1201/537/968/161/23334/51296/10548/527/23400/4035/2647/5476/23207/10948/8943/9725/10970/1175/7226/9842/10211/23385/23250/56834/408/9114/138050/26001/6396/5660/215/20/2782/9681/8904/91782/1211/10043/1173/55652/4758/2767/9145/972/535/155066/64601/162/55361/56848/221960/79888/1889/309/29988/967/9296/4067/3134…
BP	GO:1903706	regulation of hemopoiesis	328	0.347253	1.69767	3.95757e-06	0.00057712	0.000504214	3201	tags=37%, list=24%, signal=29%	2185/8289/5777/1209/6604/2242/101/678/1050/1441/6688/7040/6601/4792/6597/25/920/3726/7124/6603/60/11006/22985/57178/10859/11025/3635/8943/54440/3135/51043/6850/3059/3665/6602/3566/7538/5914/8861/3297/3561/177/56834/3106/7030/2309/54681/80762/677/54623/1051/2101/3965/8993/6598/3707/405/972/864/3718/6599/572/10538/55365/51621/4067/604/3659/55626/6777/7862/9092/6348/3071/10524/25793/10766/6469/3624/…
CC	GO:0005884	actin filament	94	0.473977	1.96447	4.1508e-06	0.000590029	0.000515492	2663	tags=37%, list=20%, signal=30%	64236/254102/9260/57175/1729/11151/3055/5880/7171/60/87/6714/11344/9051/3059/440915/23406/147179/7454/4650/9817/10634/2011/4640/23433/6525/5879/70/7169/1627/5881/83715/10297/5058/8572
CC	GO:0042788	polysomal ribosome	28	-0.657393	-2.33486	4.55432e-06	0.000613315	0.000535837	1398	tags=50%, list=11%, signal=45%	1660/6227/6235/6135/6141/6169/6142/6128/689/6130/6160/6171/6152/8667
BP	GO:0051493	regulation of cytoskeleton organization	429	0.326413	1.63128	4.47366e-06	0.000613315	0.000535837	2952	tags=32%, list=22%, signal=26%	2185/2316/1639/5580/57175/2242/396/391/1729/5829/4926/79643/5119/11151/55201/10432/2314/25/1201/9181/10263/5987/256364/3055/2288/5216/5880/7408/832/6709/4035/10163/58526/23636/11344/116985/7226/3059/23406/3265/822/23647/9647/7454/118/6280/10602/10460/5595/2934/8558/10093/388/29108/6548/7016/10300/274/51466/29109/55114/1613/10634/1020/91782/9948/8045/54961/2011/10435/23433/389/10174/28964/4204/143…
MF	GO:0004672	protein kinase activity	457	0.314833	1.58288	4.53959e-06	0.000613315	0.000535837	3159	tags=35%, list=24%, signal=27%	10155/2185/2870/5605/25865/5580/2268/8878/2242/207/7297/8536/5585/6793/25/5127/10295/57787/3055/5315/1445/9261/896/6195/8986/50488/6714/3985/1460/7867/3611/10494/2580/23031/208/6850/23476/4296/2022/9064/5566/5595/8558/1455/10922/2931/7016/6046/1018/11184/3654/1613/1025/10188/8408/28996/1020/5261/9578/369/5871/8425/5598/818/1119/9149/728642/3718/6199/5681/2011/2872/51231/25778/3551/54101/1436/7204…
BP	GO:0042110	T cell activation	457	0.314109	1.57923	5.03034e-06	0.000665739	0.000581639	1845	tags=23%, list=14%, signal=20%	8289/2319/5777/1209/6604/3683/207/101/678/10312/6778/6688/3570/6601/9466/7297/4627/6597/11151/4478/25/920/7157/5880/1445/140885/896/3726/6603/23149/60/11006/6714/57178/10859/55716/5971/602/8943/7133/54440/2000/3135/51043/6850/975/6602/3566/7454/5914/64218/23385/3561/177/2934/2309/79865/1845/80762/677/29108/10945/1051/2280/10326/960/1947/3965/3105/8764/6598/3707/6556/2207/30835/972/864/3718/3133/6…
MF	GO:0008135	translation factor activity, RNA binding	66	-0.475132	-2.07664	5.56086e-06	0.000723477	0.000632082	2493	tags=47%, list=19%, signal=38%	23708/1937/8665/10767/9669/10987/54505/1967/8562/8891/8894/1975/8892/1968/1977/2107/8669/64506/4528/28985/8664/1965/10480/9470/1983/1915/1933/51386/1974/3646/8667
MF	GO:0003743	translation initiation factor activity	44	-0.555127	-2.22308	5.70864e-06	0.000730326	0.000638066	2375	tags=55%, list=18%, signal=45%	8665/9669/10987/54505/1967/8562/8891/8894/1975/8892/1968/1977/8669/4528/28985/8664/1965/10480/9470/1983/51386/1974/3646/8667
BP	GO:0006337	nucleosome disassembly	16	0.774165	2.18784	6.68669e-06	0.000841427	0.000735132	1310	tags=69%, list=10%, signal=62%	8289/6604/6601/6597/4778/6603/3159/6749/6602/6598/6599
BP	GO:0022604	regulation of cell morphogenesis	251	0.363513	1.73909	6.82039e-06	0.000844408	0.000737737	2301	tags=28%, list=17%, signal=23%	2185/2316/5034/81/2268/57175/2242/391/51177/1729/3689/4627/11151/4478/23654/25/752/3055/5880/832/29882/6714/1785/226/23129/3611/116985/1072/64218/10602/811/388/7016/1855/57154/960/9203/1613/9948/2011/10435/23433/389/10507/1436/29780/5064/9344/9368/2048/79784/1857/6369/23580/6348/5879/79594/9820/10458/7422/3706/1364/127833/1627/816/5881/5365/81848/6792/11135
CC	GO:0005938	cell cortex	238	0.367046	1.74959	7.50388e-06	0.000914283	0.000798784	2684	tags=31%, list=20%, signal=25%	2185/64236/2316/2319/1639/81/11336/391/5829/1487/4926/4627/11151/7127/752/1212/5216/5880/22906/832/6709/7171/60/10121/87/29959/208/23265/3059/23406/23647/9854/10211/4650/2934/1455/388/80762/50855/1211/9948/4640/389/3927/6261/4354/23187/1500/1778/4082/5879/1488/59341/1627/57817/5881/10487/4771/8419/9322/10755/364/4843/3996/1522/6786/8312/7122/2995/27289/4643/1742/6624
BP	GO:0016236	macroautophagy	231	0.374524	1.77832	7.74331e-06	0.000928714	0.000811392	1747	tags=29%, list=13%, signal=26%	9146/826/8878/7249/1509/57192/2548/207/10312/5768/23339/79643/5119/11337/11152/1201/7157/79720/527/23400/27183/6714/6829/51322/26100/3162/823/23241/9842/23265/23647/51160/81876/5566/23192/5595/8897/10919/9114/79065/23130/488/550/11140/57154/11331/8408/26073/1020/91782/11178/10043/10715/535/155066/64601/60673/3064/29978/51368/26471/8517/10013/55626/7879/6048/65018
BP	GO:1902105	regulation of leukocyte differentiation	267	0.350939	1.69129	8.64967e-06	0.00102146	0.000892422	2894	tags=35%, list=22%, signal=28%	8289/5777/1209/6604/2242/101/678/7040/6601/6597/25/920/3726/7124/6603/60/11006/22985/57178/10859/11025/3635/8943/54440/3135/51043/6850/3059/3665/6602/3566/5914/3297/3561/177/56834/3106/7030/2309/80762/677/1051/2101/3965/8993/6598/3707/972/864/3718/6599/572/10538/55365/4067/604/3659/55626/6777/9092/6348/3071/10524/25793/10766/6469/3624/10288/1493/9398/8737/1230/7305/3204/28959/6988/56998/54997/409…
MF	GO:0001221	transcription coregulator binding	94	0.46537	1.9288	9.46858e-06	0.00110122	0.000962111	2636	tags=40%, list=20%, signal=33%	23625/3727/10014/6604/51341/1487/6597/6256/3068/3159/5970/2033/5914/7709/2309/10919/4005/80764/1025/864/9572/4088/81857/604/4772/6667/10013/8237/1488/10458/58525/5465/2113/7015/2353/8841/6496/1108
BP	GO:0042274	ribosomal small subunit biogenesis	61	-0.493676	-2.12069	1.10218e-05	0.00126274	0.00110322	1722	tags=41%, list=13%, signal=36%	6217/8780/10436/6223/6194/6208/25983/11157/55272/11056/6227/404672/55781/6169/55813/25926/6230/3921/10199/7520/51077/55127/4869/10885/6229
CC	GO:0030139	endocytic vesicle	292	0.345958	1.68213	1.25883e-05	0.0014004	0.00122349	2143	tags=27%, list=16%, signal=23%	2319/311/9146/6844/7791/57192/101/10312/1441/11151/7431/23166/920/752/1212/161/5880/6892/527/10938/81622/653361/4035/409/1785/3107/79890/1175/3135/9605/6850/7454/3106/2934/4689/9114/811/8291/3105/9170/8993/1211/6556/1173/818/972/535/155066/10525/3133/10435/1991/55198/9610/29988/4067/3134/55626/7879/10618/3916/2535/23580/4353/6810/7316/9230/9463/1493/11021/5878/9830/54361/163/127833/8877/5869/949/…
MF	GO:0003682	chromatin binding	462	0.313165	1.57698	1.25466e-05	0.0014004	0.00122349	2584	tags=29%, list=20%, signal=24%	10155/8289/81/23523/9112/26155/1050/6881/6688/10370/22904/1487/8535/6601/6597/5585/84759/7157/3661/9968/23135/5428/6603/7376/2355/3159/60/5430/6830/2962/23636/23558/57680/473/57658/1460/6829/51322/22907/1107/6472/1059/5970/6749/23476/6602/2033/1912/5914/8861/3297/64743/8314/8019/9314/2309/23125/10919/7343/339287/23060/6046/79685/54623/116138/1051/23468/5089/53615/6015/5976/3054/1025/23309/6598/47…
MF	GO:0061629	RNA polymerase II-specific DNA-binding transcription factor binding	307	0.341047	1.66055	1.29069e-05	0.00141534	0.00123654	2571	tags=31%, list=19%, signal=25%	3727/8289/10014/81/6604/1616/9112/1050/6881/6688/51341/10370/1487/4792/6597/6256/5585/7157/2288/9968/7376/3159/60/10474/6714/23558/1460/5970/11176/3059/2033/79447/1877/118/8861/3297/9314/811/4005/25855/10025/3164/1051/11240/9049/9150/9817/11331/4209/8553/10634/28996/3315/6598/8904/7205/405/2002/4088/81857/4772/6667/6777/54828/4654/2637/10766/1488/64210/947/6878/9862/24148/65992/64324/1959/6874/37…
BP	GO:0034660	ncRNA metabolic process	433	-0.265516	-1.5196	1.49829e-05	0.00161984	0.00141521	1988	tags=26%, list=15%, signal=23%	55278/51575/51067/11137/55140/54901/6894/5073/10269/6217/8780/8850/3091/652/23404/10436/10352/6223/4931/11062/57038/10969/64863/6194/55164/1787/51106/2091/10813/1662/6208/25983/23369/55661/65080/112479/11157/55272/25821/11102/4087/6619/55759/1022/6125/55299/55596/10200/5978/64425/11056/60487/6227/55035/54680/26156/6741/404672/84705/11103/79664/54802/51574/6135/11340/1653/9045/7247/55511/10208/104…
BP	GO:0031400	negative regulation of protein modification process	392	0.320545	1.58949	1.60604e-05	0.00171222	0.00149592	2366	tags=26%, list=18%, signal=22%	5339/5777/5580/2539/8878/578/7249/23645/64780/10362/207/26155/1050/6688/706/1487/7040/79643/10636/5585/51035/1981/25/5987/2874/8815/140885/23770/7124/11284/2950/4035/11006/2771/6830/26277/409/11338/23636/7529/58190/6992/5970/7531/9647/51160/2022/5518/9021/408/1845/29108/1032/7016/80764/1855/2280/50855/58509/3315/9961/1020/10019/6598/493/84619/10106/3551/10507/54880/56848/6895/1026/23624/4067/6609…
CC	GO:0030055	cell-substrate junction	384	0.319284	1.57991	1.69422e-05	0.00178149	0.00155644	1903	tags=24%, list=14%, signal=21%	2185/5339/2316/5034/6522/2319/5605/9260/81/2783/7791/57175/2242/391/5829/3689/4627/3678/7431/4478/2314/9181/3055/5216/7094/5880/7408/527/7171/23396/682/4035/3159/60/87/6714/1785/7529/3611/3695/2580/1072/823/7531/975/9754/4267/1265/3728/10211/118/2022/23385/5595/2934/811/388/6548/3660/51466/5094/7106/3603/960/5297/3315/7205/5786/22888/10525/8321/23164/10174/6204/3927/28964/309/29780/1465/3383/6222…
BP	GO:0035304	regulation of protein dephosphorylation	70	0.506067	2.0087	1.73585e-05	0.00180059	0.00157313	2370	tags=44%, list=18%, signal=37%	5580/23645/7040/22870/7124/2771/7529/1460/6992/7531/5725/8189/5300/2280/1827/5528/3064/51231/3551/6609/3958/55626/3071/65018/9701/10288/5511/11314/801/1003/23141
BP	GO:0007033	vacuole organization	158	0.39573	1.78186	1.91666e-05	0.00193583	0.00169128	1747	tags=30%, list=13%, signal=27%	7942/1509/2548/10312/5298/79643/5119/2896/11151/11337/11152/1201/537/1200/527/23400/27183/26100/51172/23241/23647/81876/23192/8897/10919/79065/23130/488/57154/3257/8408/91782/4669/10043/535/64601/60673/2055/29978/26471/9296/5027/55626/7879/6048/53/3073/65018
BP	GO:0000375	RNA splicing, via transesterification reactions	238	-0.315025	-1.67015	1.89399e-05	0.00193583	0.00169128	2229	tags=34%, list=17%, signal=29%	6633/202559/51319/23064/10492/10929/4691/6627/4236/3550/51747/79005/27257/6629/55660/55796/64783/51340/1660/55280/51362/8559/5411/60625/3185/55234/10659/10236/11157/9733/55596/5978/8899/4116/51691/58155/11066/10150/5935/51574/27258/3189/11168/1653/1207/96764/9588/4154/9584/91746/6634/25949/10772/3183/2332/3181/6426/2483/7072/55696/6432/10179/6733/8487/8087/22938/9879/10199/220988/9589/6430/988/10…
CC	GO:0030667	secretory granule membrane	242	0.36463	1.74466	1.96069e-05	0.00195457	0.00170766	2209	tags=30%, list=17%, signal=26%	2319/23218/11322/11336/6844/3683/2548/101/391/10312/1729/3689/221/6793/968/161/140885/527/27180/682/728/3107/11025/7133/9725/10970/7226/8514/79930/10555/23385/23250/3106/3903/8694/138050/9761/10326/5660/960/8904/6556/3163/10043/3579/2207/9145/535/64386/3687/79888/967/3958/5023/7879/3916/566/3071/11001/5879/6861/63910/334/10288/5878/7305/2171/127833/5869/23352/11314/5864/5329
BP	GO:0032271	regulation of protein polymerization	156	0.396964	1.781	2.06847e-05	0.00203558	0.00177843	2820	tags=38%, list=21%, signal=30%	2185/1639/5580/2242/4926/11151/2314/25/3055/2288/5216/7408/832/6709/11344/3059/23406/822/118/10602/2934/10093/29108/274/51466/54961/10435/28964/4204/6904/54434/55626/84722/6369/23580/24139/3071/65018/5879/51673/10458/55755/1627/11135/26999/64223/1003/50853/3303/27124/22924/2885/10095/1859/5058/10094/11075/29098/9113
BP	GO:0002263	cell activation involved in immune response	238	0.359572	1.71397	2.26893e-05	0.00220459	0.00192609	1809	tags=26%, list=14%, signal=23%	2185/5777/6813/2268/6844/3683/2242/6778/6688/22904/3570/7040/9466/2896/3689/11151/25/7157/11027/5880/3726/4035/4615/6830/10859/5971/602/4242/3162/51043/6850/975/3566/5914/64218/80762/29108/8291/3965/8993/6556/148022/2207/8741/972/3718/10538/56848/5293/4067/3596/3383/604/3958/3134/1113/3916/6348/3071/6810/54518/2067/613
BP	GO:0000377	RNA splicing, via transesterification reactions with bulged adenosine as nucleophile	234	-0.313998	-1.6681	2.33071e-05	0.00220871	0.00192969	2229	tags=34%, list=17%, signal=29%	6633/202559/51319/23064/10492/10929/4691/6627/4236/3550/51747/79005/6629/55660/55796/64783/51340/1660/55280/51362/8559/5411/60625/3185/55234/10659/10236/11157/9733/55596/5978/8899/4116/51691/58155/11066/10150/5935/51574/27258/3189/11168/1653/1207/96764/9588/4154/9584/91746/6634/25949/10772/3183/2332/3181/6426/2483/7072/55696/6432/10179/6733/8487/8087/22938/9879/220988/9589/6430/988/10465/6936/234…
BP	GO:0000398	mRNA splicing, via spliceosome	234	-0.313998	-1.6681	2.33071e-05	0.00220871	0.00192969	2229	tags=34%, list=17%, signal=29%	6633/202559/51319/23064/10492/10929/4691/6627/4236/3550/51747/79005/6629/55660/55796/64783/51340/1660/55280/51362/8559/5411/60625/3185/55234/10659/10236/11157/9733/55596/5978/8899/4116/51691/58155/11066/10150/5935/51574/27258/3189/11168/1653/1207/96764/9588/4154/9584/91746/6634/25949/10772/3183/2332/3181/6426/2483/7072/55696/6432/10179/6733/8487/8087/22938/9879/220988/9589/6430/988/10465/6936/234…
BP	GO:0043254	regulation of protein-containing complex assembly	320	0.325002	1.58524	2.4025e-05	0.00224897	0.00196486	2381	tags=30%, list=18%, signal=25%	2185/1639/5580/578/2242/8775/7040/23339/4926/10273/11151/4478/2314/1981/25/7157/3055/2288/5216/7408/832/6709/7124/7376/4615/9780/6714/51112/11344/6850/3059/23406/822/2033/118/10602/3297/2934/10093/56926/29108/274/51466/3054/8408/148022/8543/54961/3931/50807/64601/10435/389/28964/4204/6904/54434/81857/7067/3958/10013/9641/55626/84722/6369/23580/24139/3071/65018/5894/10113/5526/5879/51673/54922/498…
MF	GO:0003712	transcription coregulator activity	392	0.317714	1.57545	2.51814e-05	0.00232883	0.00203463	2611	tags=32%, list=20%, signal=26%	10155/8289/81/51586/6604/22992/1616/9112/26155/10370/5829/1487/6478/8535/6601/6597/3068/5585/4793/10432/25/5987/2874/9968/8295/6603/22913/3159/10474/87/23558/57178/473/57658/602/23476/6602/2033/7832/3337/3728/8861/408/23125/10498/4005/10025/79685/10589/7090/7706/9049/3054/28996/27005/23309/6598/23082/9149/8543/83637/1820/79364/6599/5036/1991/7536/54880/63035/9189/4204/2002/26471/10409/6837/23648/…
BP	GO:0046777	protein autophosphorylation	193	0.376884	1.74296	2.64878e-05	0.00236419	0.00206553	3145	tags=40%, list=24%, signal=31%	10155/2185/5605/25865/2268/2242/207/6793/25/3055/1445/9261/23400/50488/6714/7867/10494/6850/4296/2022/5566/5595/7016/11184/3654/1613/8408/9961/1020/9149/60673/2011/2872/1436/790/9344/4067/1636/65018/1196/6794/5526/8569/10645/7422/8737/9776/22853/22848/816/1198/3725/2041/5753/3643/801/6792/7786/9706/2049/4215/1859/4140/5058/5062/3645/7070/8576/23617/8428/2261/2324/4294/51755/2932/5292/8550/27102
BP	GO:0051258	protein polymerization	218	0.365713	1.71558	2.6229e-05	0.00236419	0.00206553	2381	tags=31%, list=18%, signal=26%	2185/1639/5580/2242/1729/4926/11151/2314/25/3055/51734/2288/5216/7408/832/6709/58526/11344/27338/9051/3059/23406/822/7454/118/10602/10844/2934/10093/7283/29108/274/51466/8636/54961/2801/79585/10435/28964/4204/6904/54434/55626/84722/6369/23580/1453/24139/3071/65018/5879/51673/10458/55755/8936/59341/1627/11135/26999/64223/1003/50853/3303/79778/27124/22924/2885
BP	GO:0051249	regulation of lymphocyte activation	417	0.314887	1.57089	2.61851e-05	0.00236419	0.00206553	1787	tags=22%, list=14%, signal=19%	8289/2319/5777/1209/2268/6604/207/101/678/6778/7040/6601/9466/7297/6597/11151/5585/25/920/5880/1445/140885/3726/6603/23149/60/11006/4615/6830/90379/6714/57178/10859/3635/8943/7133/54440/3135/51043/6850/975/6602/3566/5914/3561/177/2309/1845/80762/677/29108/25807/1051/10326/1947/3965/3105/8764/8993/6598/3707/148022/79155/8741/30835/972/864/3718/3133/6599/572/10538/7293/1026/4067/2048/8379/3596/604/…
CC	GO:0101003	ficolin-1-rich granule membrane	49	0.549116	2.02865	2.9553e-05	0.00259763	0.00226948	2200	tags=45%, list=17%, signal=38%	23218/2548/101/10312/1729/3689/161/140885/527/7226/79930/6556/2207/535/3687/3958/3916/3071/5879/10288/23352/11314
BP	GO:0002366	leukocyte activation involved in immune response	235	0.357085	1.69749	2.978e-05	0.00259763	0.00226948	1809	tags=26%, list=14%, signal=23%	2185/5777/6813/2268/6844/3683/2242/6778/6688/22904/3570/7040/9466/2896/3689/11151/25/7157/11027/5880/3726/4615/6830/10859/5971/602/4242/3162/51043/6850/975/3566/5914/64218/80762/29108/8291/3965/8993/6556/148022/2207/8741/972/3718/10538/56848/5293/4067/3596/3383/604/3958/3134/1113/3916/6348/3071/6810/54518/2067/613
CC	GO:0101002	ficolin-1-rich granule	166	0.393386	1.78442	3.02247e-05	0.0026068	0.00227749	2452	tags=39%, list=19%, signal=32%	5709/23218/1509/2548/124583/101/10312/1729/3689/1471/3101/161/5315/2821/5211/240/140885/527/2950/1460/226/823/7226/79930/23406/3728/327/2934/80301/1476/10120/9961/6556/1508/5265/2207/47/978/535/79169/3687/7077/79792/3958/11333/3916/1938/2219/3071/3310/1675/5879/10075/10288/7415/1512/23352/11314/4318/5553/3303/5223/1522/1432
BP	GO:0071222	cellular response to lipopolysaccharide	182	0.388742	1.78571	3.1372e-05	0.00267569	0.00233767	2495	tags=32%, list=19%, signal=27%	10318/207/6688/706/22904/7040/4792/7431/4793/25/968/3055/11027/3661/140885/7124/2950/4615/6714/10859/7133/5970/7538/5914/3297/5595/59307/29108/10594/54623/1051/3654/5976/58509/4790/148022/79155/23328/9572/1053/8106/28964/4067/2048/671/6348/613/10288/6915/949/57817/1019/2693/445/4843/10270/8140/1432/92140
BP	GO:0051651	maintenance of location in cell	189	0.383334	1.76831	3.28749e-05	0.00276973	0.00241984	1829	tags=26%, list=14%, signal=23%	2185/2316/5777/5905/57192/2548/207/1729/706/25792/10956/11151/25/920/5371/11344/8943/7226/80024/6280/5566/2934/811/2512/10945/2280/10523/3098/5335/1020/11014/54923/3064/2946/309/2812/22821/4067/6261/3596/3934/8733/5027/6348/3954/3073/65018/5031/25777
CC	GO:0005925	focal adhesion	377	0.321539	1.58908	3.31963e-05	0.00276973	0.00241984	1903	tags=24%, list=14%, signal=22%	2185/5339/2316/5034/6522/2319/5605/9260/81/2783/7791/57175/2242/391/5829/3689/4627/3678/7431/4478/2314/9181/3055/5216/7094/5880/7408/527/7171/23396/682/4035/3159/60/87/6714/1785/7529/3611/3695/2580/1072/823/7531/975/9754/4267/1265/3728/10211/118/2022/23385/5595/2934/811/388/6548/3660/51466/5094/7106/3603/960/5297/3315/7205/5786/22888/10525/8321/23164/10174/6204/3927/28964/309/29780/1465/3383/6222…
BP	GO:0035303	regulation of dephosphorylation	101	0.450635	1.89027	3.38008e-05	0.00278984	0.00243741	2370	tags=39%, list=18%, signal=32%	5580/23645/7040/22870/7124/2771/6714/7529/1460/6992/7531/5725/8189/8897/5300/2280/1827/23381/5528/3064/51231/3551/10507/4088/9887/6609/3958/55626/3071/65018/9701/10288/5511/11314/9110/801/5341/1003/23141
MF	GO:0003713	transcription coactivator activity	226	0.358895	1.69628	3.43953e-05	0.0028087	0.00245389	2611	tags=35%, list=20%, signal=28%	10155/8289/81/6604/1616/9112/10370/1487/6601/6597/5585/4793/10432/25/5987/2874/9968/6603/3159/10474/87/23558/57178/473/57658/602/23476/6602/2033/3728/408/23125/10498/4005/10025/10589/7706/9049/3054/28996/27005/6598/23082/9149/8543/83637/79364/6599/9189/2002/26471/23648/57326/4261/10524/23076/4851/1488/9794/64210/7789/6878/9830/9862/24148/9477/10521/51442/10084/7041/6737/84148/2113/11243/92140/578…
BP	GO:0007265	Ras protein signal transduction	282	0.338942	1.63914	3.54259e-05	0.00286241	0.00250081	2036	tags=26%, list=15%, signal=22%	10155/23550/393/8878/28511/396/27128/391/2664/11337/25/9181/253980/7157/5880/9826/9138/8216/6714/10163/1785/23636/9909/392/1072/5900/79930/9754/3265/7454/10211/10602/4650/22898/408/9267/1796/388/9266/55114/9046/2782/8625/9922/3707/10235/27352/2889/8567/10435/28964/54869/5863/22821/1026/2048/11188/604/6237/9844/23580/5894/57493/613/55738/5879/398/4851/54922/2859/8936/11021
MF	GO:0019902	phosphatase binding	157	0.391694	1.75785	4.40877e-05	0.00352518	0.00307985	2663	tags=36%, list=20%, signal=29%	7249/23645/6778/5829/22870/29888/7157/1445/54976/140885/11006/8178/2962/10859/6992/7531/6850/3728/5595/8897/6548/23589/26133/23381/5499/9961/493/6780/3718/572/51231/5514/1436/4088/9887/9368/3958/9641/55626/9814/9701/10288/7415/8877/3784/5465/7187/9110/1003/5770/23141/2885/1432/23139/286/1742/8572
CC	GO:0035580	specific granule lumen	56	0.523718	1.99698	4.49986e-05	0.00356092	0.00311108	3087	tags=55%, list=23%, signal=43%	5777/1509/124583/5768/5199/6709/1265/3728/54472/8993/4790/4758/8566/1991/7077/79792/671/3934/4069/5004/26/1116/10855/6590/1522/30/1669/10562/2919/3837/820
BP	GO:0000422	autophagy of mitochondrion	74	0.487993	1.95445	4.74602e-05	0.00367984	0.00321498	2047	tags=42%, list=15%, signal=36%	8878/7249/706/11337/11152/7157/23400/26100/6721/23647/23192/2931/79065/23130/11140/11331/8408/10715/2011/3064/51024/10013/55626/65018/1459/25793/79594/27429/10645/10075/9776
BP	GO:0061726	mitochondrion disassembly	74	0.487993	1.95445	4.74602e-05	0.00367984	0.00321498	2047	tags=42%, list=15%, signal=36%	8878/7249/706/11337/11152/7157/23400/26100/6721/23647/23192/2931/79065/23130/11140/11331/8408/10715/2011/3064/51024/10013/55626/65018/1459/25793/79594/27429/10645/10075/9776
BP	GO:1903037	regulation of leukocyte cell-cell adhesion	315	0.330221	1.61117	4.88695e-05	0.00375122	0.00327734	2777	tags=31%, list=21%, signal=25%	8289/2319/5777/6604/207/101/6601/9466/7297/3689/6597/11151/25/920/1445/240/140885/7124/6603/23149/60/11006/6714/57178/10859/8943/54440/5970/3135/51043/6850/975/6602/3566/5914/3561/177/9314/2309/1845/80762/29108/1051/10326/3654/960/1947/3965/3105/8764/6598/3707/30835/972/864/3718/3133/6599/572/1991/9435/4067/8379/604/3958/3659/55626/6777/7409/9092/3071/1725/10524/2529/6469/10288/1493/84830/5465/11…
BP	GO:0010563	negative regulation of phosphorus metabolic process	334	0.322146	1.57873	4.9901e-05	0.00379248	0.00331339	2370	tags=27%, list=18%, signal=23%	5339/5777/5580/578/7249/23645/64780/207/1050/706/7040/79643/10636/5585/1981/25/5987/7157/1445/140885/23770/7124/2950/4035/11006/2771/409/23636/7529/58190/6992/7531/9647/2022/5518/9021/2931/1845/29108/1032/7016/1855/2280/20/50855/58509/3315/9961/10019/84619/978/10106/3551/10507/28964/26471/79888/6895/1026/23624/51024/4067/6609/2048/3958/55861/3071/57493/25793/4298/1609/54922/3624/103/5511/55755/37…
BP	GO:0008360	regulation of cell shape	126	0.411128	1.79288	5.07428e-05	0.00381864	0.00333625	1981	tags=31%, list=15%, signal=27%	2185/2268/2242/391/51177/1729/3689/4627/11151/4478/23654/752/3055/5880/226/23129/116985/64218/10602/388/1613/9948/2011/10435/23433/389/10507/1436/29780/5064/9344/9368/79784/6369/23580/6348/5879/10458/7422
CC	GO:0031234	extrinsic component of cytoplasmic side of plasma membrane	79	0.46591	1.88217	5.96133e-05	0.00444264	0.00388141	1299	tags=27%, list=10%, signal=24%	2185/6277/2783/2268/2242/207/2787/5127/3055/2769/2778/2771/6714/8514/6850/9267/2782/10188/2767/3092/23344
BP	GO:0009896	positive regulation of catabolic process	391	0.313182	1.55363	6.20104e-05	0.00457684	0.00399867	2566	tags=31%, list=19%, signal=26%	2185/7942/5580/7249/7917/207/28952/101/678/1050/91304/10273/4478/11337/11152/4849/5127/9810/5987/127544/7124/79016/4035/8570/10444/51343/6829/51322/112398/57104/7133/3162/208/975/7832/7538/23053/51160/9567/5886/3297/6449/5595/2309/2931/80762/677/1642/6811/23130/25807/1855/57154/9817/215/20/5976/56478/8408/9681/5261/4947/10043/148022/10715/27352/23163/8078/8742/405/572/60673/3064/10425/29978/26058…
BP	GO:1902903	regulation of supramolecular fiber organization	299	0.330372	1.60623	6.60758e-05	0.00483045	0.00422024	2936	tags=34%, list=22%, signal=27%	2185/2316/1639/5580/57175/2242/5829/4926/11151/55201/2314/25/9181/5987/3055/2288/5216/7408/832/6709/10163/58526/11344/116985/3059/23406/822/23647/9647/7454/118/10602/2934/10093/29108/6548/7016/10300/274/51466/29109/1613/9948/54961/10435/389/10174/28964/4204/6904/54434/4088/79709/10013/84722/6369/23580/24139/3071/7148/5879/9463/10458/55755/8936/25876/54361/59341/1627/2041/4771/5341/11135/26999/642…
BP	GO:0097191	extrinsic apoptotic signaling pathway	195	0.367964	1.70649	6.82691e-05	0.00494371	0.00431919	3052	tags=35%, list=23%, signal=27%	4055/578/207/1616/6688/3570/6478/7040/11337/8794/9181/10197/7124/2950/6714/8682/5371/7133/3162/5970/599/5518/598/2309/2931/29108/9191/5499/5598/8742/8567/4000/572/10572/2872/3064/4088/51304/3383/3958/5027/7132/6810/5894/10616/6272/50486/3624/27429/8737/581/3303/1621/970/7015/51079/5062/8996/3875/2730/672/2876/2261/2852/9531/6498/204851/55367
CC	GO:0022627	cytosolic small ribosomal subunit	38	-0.549988	-2.12616	6.93597e-05	0.00497575	0.00434718	1722	tags=42%, list=13%, signal=37%	6217/6223/6194/6208/6227/6235/6206/6188/6230/6205/3921/6189/6191/6229/6210/6187
BP	GO:0007264	small GTPase mediated signal transduction	399	0.312441	1.55193	7.27859e-05	0.00512573	0.00447821	2036	tags=23%, list=15%, signal=20%	10155/23550/393/8878/7249/28511/396/6494/27128/29/391/51291/50619/10287/6478/2664/11337/4924/25/9181/253980/7157/5880/9826/9138/89941/8216/6714/10163/1785/23636/9909/392/116985/1072/3162/5900/79930/9754/3265/23647/7454/10211/10602/4650/22898/408/9267/1796/388/9266/55114/9046/2782/8625/10188/9922/3707/5338/10235/27352/2889/8567/10435/23433/389/28964/54869/23094/7204/5863/22821/1026/2048/11188/604/…
BP	GO:0008380	RNA splicing	338	-0.271328	-1.49829	7.27068e-05	0.00512573	0.00447821	1522	tags=25%, list=11%, signal=23%	55660/55796/64783/64863/51340/9360/1660/5295/55280/51362/8559/5411/151987/60625/6883/3185/55234/27332/10659/10236/11157/9295/9733/55596/5978/8899/10915/7369/4116/51691/58155/11066/10150/5935/51574/27258/10625/3189/11168/1653/1207/96764/11319/9588/4154/9584/91746/6634/25949/57396/10772/3183/2332/3181/6426/2483/7072/55696/80746/6432/10179/6733/8487/8087/22938/9879/10199/220988/9984/55578/9589/6430/…
BP	GO:0008154	actin polymerization or depolymerization	149	0.394969	1.75483	7.80742e-05	0.00539908	0.00471703	2477	tags=34%, list=19%, signal=28%	2185/5580/64780/1729/11151/2314/25/3055/51734/5216/7408/832/6709/11344/9645/1072/9051/3059/23406/822/7454/118/10602/2934/10093/29108/274/51466/9948/54961/79585/10435/54434/6369/23580/3071/5879/10458/8936/1627/2693/5341/11135/26999/64223/50853/79778/2885/23616/10095
BP	GO:0031348	negative regulation of defense response	196	0.373396	1.72989	7.74353e-05	0.00539908	0.00471703	3135	tags=40%, list=24%, signal=31%	5580/2268/79651/2896/3055/2874/240/8815/140885/7376/2950/6714/409/10859/7133/3135/6850/7538/9021/3106/9314/80762/5094/3965/3105/58509/8993/5335/4790/55666/84243/5598/9572/3133/1991/28964/4088/79671/6895/4067/23170/3596/3134/60343/5045/6773/7132/613/710/2294/79594/103/57817/5465/2693/1003/100507436/6737/1432/10906/335/4940/4277/26146/4598/2876/81858/4192/54/325/64127/2852/1398/8530/3949/1813/9636/…
MF	GO:0045182	translation regulator activity	108	-0.372445	-1.73723	8.29425e-05	0.00568453	0.00496642	2564	tags=36%, list=19%, signal=29%	23191/23708/1937/8665/10767/9669/10987/54505/1967/8562/8891/8894/1975/8892/1968/6208/1977/2107/10643/406991/8669/64506/4528/28985/8664/2332/1965/1617/10480/8087/9470/1983/1915/1933/51386/1974/3646/6146/8667
CC	GO:0005844	polysome	57	-0.468117	-1.97548	8.5899e-05	0.00583505	0.00509793	1672	tags=44%, list=13%, signal=38%	8939/6194/1660/26019/6227/140801/6235/6135/6141/7411/6169/2332/1965/6142/6128/689/6188/8087/5682/6130/6160/6171/6191/6152/8667
BP	GO:0002250	adaptive immune response	388	0.307729	1.52463	8.81757e-05	0.00593717	0.00518714	1899	tags=21%, list=14%, signal=19%	2185/7942/4791/5777/25865/5580/23765/57192/6494/10312/6778/3570/7040/9466/7297/5585/79168/920/5987/127544/1445/3726/7124/81622/11006/4615/6830/10859/3107/5971/602/11025/3635/7133/54440/3135/51043/6850/975/3665/3265/3566/7454/64218/177/3106/3903/7030/80762/29108/11024/3105/8764/6556/973/2207/8741/30835/972/3718/54923/3133/10538/5293/64170/4067/51279/2048/3383/604/3134/3659/5027/974/5817/3071/2067/…
BP	GO:0071216	cellular response to biotic stimulus	209	0.356072	1.66279	9.2103e-05	0.00614767	0.00537106	2495	tags=31%, list=19%, signal=26%	10318/207/6688/706/22904/7040/4792/7431/4793/25/7157/968/3055/11027/3661/140885/7124/2950/4615/6714/10859/7133/5970/6850/7538/5914/3297/5595/59307/29108/10594/54623/1051/3654/80198/5976/58509/4790/148022/79155/23328/978/9572/1053/8106/28964/4067/2048/671/6348/8243/613/4851/10288/6915/949/57817/1019/2693/445/4843/10270/8140/1432/92140
BP	GO:0000423	mitophagy	27	0.636906	2.05407	9.29943e-05	0.00615366	0.00537629	2420	tags=56%, list=18%, signal=45%	8878/7249/7157/23647/23192/11140/11331/10715/10013/55626/65018/27429/10075/9776/7416
BP	GO:0032273	positive regulation of protein polymerization	72	0.473223	1.88581	9.72558e-05	0.00638064	0.0055746	2381	tags=39%, list=18%, signal=32%	2185/1639/2242/4926/3055/5216/7408/10602/29108/274/51466/10435/28964/4204/55626/84722/6369/23580/3071/65018/5879/51673/10458/55755/11135/64223/3303/2885
BP	GO:0002183	cytoplasmic translational initiation	35	-0.552896	-2.07069	0.000102342	0.00665744	0.00581642	2375	tags=57%, list=18%, signal=47%	8665/54505/8562/8891/8894/1975/1968/4690/6451/8669/28985/8664/23521/10480/1983/22916/51386/1974/3646/8667
BP	GO:0051495	positive regulation of cytoskeleton organization	164	0.384496	1.73539	0.00010388	0.00670068	0.0058542	2381	tags=32%, list=18%, signal=26%	2185/1639/2242/5829/4926/25/5987/3055/5216/7408/10163/23636/3059/3265/9647/7454/10602/2934/29108/7016/10300/274/51466/29109/1020/9948/10435/389/10174/28964/4204/4088/5027/84722/6369/23580/3071/54828/1778/5879/10458/55755/8936/54361/59341/2041/4771/5341/11135/64223/3303/2885
CC	GO:0045335	phagocytic vesicle	117	0.413339	1.77872	0.000105708	0.00676182	0.00590762	1751	tags=34%, list=13%, signal=30%	311/9146/7791/57192/101/10312/11151/7431/752/5880/6892/527/81622/653361/1785/3107/3135/6850/7454/3106/2934/4689/9114/811/3105/8993/6556/535/155066/3133/10435/1991/55198/3134/55626/7879/3916/23580/4353/6810
BP	GO:0060627	regulation of vesicle-mediated transport	436	0.300327	1.50551	0.00010732	0.00680816	0.00594811	2839	tags=30%, list=21%, signal=24%	10347/5605/9146/6813/2268/7249/6844/64780/2242/6688/5199/3689/11151/4478/399687/25/1201/3055/5880/1445/140885/7124/23400/10938/27183/7376/4035/2771/6714/409/1785/392/10859/3162/79890/208/1175/6850/3566/9094/1265/51160/10211/3561/5595/408/811/29108/274/488/8291/1855/9784/10326/20/3965/10188/1020/6556/5338/1173/2207/3092/79872/29978/28964/55198/56848/8527/967/51272/4067/6609/3596/3958/3134/5023/560…
BP	GO:1904358	positive regulation of telomere maintenance via telomere lengthening	32	-0.566359	-2.0731	0.000116407	0.00717078	0.00626492	882	tags=41%, list=7%, signal=38%	5588/545/908/472/10575/140609/3181/25913/22948/10576/7520/10694/3178
CC	GO:0042641	actomyosin	66	0.472492	1.84923	0.000116241	0.00717078	0.00626492	2684	tags=39%, list=20%, signal=32%	64236/9260/81/7791/57175/5829/4627/399687/7171/87/3611/1265/29109/10634/9578/7205/23094/79784/4624/59/1627/79778/4486/2275/8572/6624
BP	GO:0002275	myeloid cell activation involved in immune response	83	0.452432	1.84886	0.000118641	0.00717078	0.00626492	2200	tags=39%, list=17%, signal=32%	5777/6813/2268/6844/2242/6688/22904/2896/3689/11027/5880/4615/3162/6850/3566/29108/8291/3965/148022/2207/56848/5293/4067/3596/1113/6348/6810/613/2294/7305/7462/11314
BP	GO:0010821	regulation of mitochondrion organization	123	0.417057	1.81689	0.000118565	0.00717078	0.00626492	3128	tags=42%, list=24%, signal=33%	8878/578/7249/207/706/7157/23400/89941/409/10105/6721/2033/599/10493/598/2931/29108/27141/10715/293/4000/572/3064/51024/10013/55626/6773/65018/1459/25793/79594/27429/10645/10075/80179/4318/5329/64083/581/3303/7416/51547/5910/8996/2021/4836/2876/2852/54978/7755/64423/2932
BP	GO:0050777	negative regulation of immune response	159	0.374102	1.68619	0.000116195	0.00717078	0.00626492	2699	tags=37%, list=20%, signal=30%	5777/2268/79651/6778/6688/9466/2896/5987/3055/8815/7376/11006/6714/409/10859/3635/3162/3135/51043/6850/3566/3106/80762/3965/3105/8764/58509/8993/5335/84243/3718/3133/79671/4067/23170/604/3958/3134/60343/5045/6773/3071/5133/613/710/2294/79594/103/1493/11314/100507436/6737/1432/10906/4092/3077/4940/3142/259307
BP	GO:0032956	regulation of actin cytoskeleton organization	286	0.332369	1.60951	0.000117328	0.00717078	0.00626492	2952	tags=32%, list=22%, signal=26%	2185/2316/5580/57175/2242/396/391/5829/11151/2314/25/5987/3055/5216/5880/7408/832/6709/4035/10163/11344/116985/7226/3059/23406/3265/822/23647/9647/7454/118/10602/2934/8558/10093/388/29108/6548/7016/274/51466/29109/55114/1613/1020/9948/54961/10435/23433/389/10174/1436/54434/4088/9344/6369/23580/3071/54828/5879/9463/10458/8936/54361/1627/5881/2041/4771/5341/11135/26999/64223/50853/2885/23616/10095/…
BP	GO:1903008	organelle disassembly	109	0.416843	1.78222	0.000120523	0.0072276	0.00631456	2119	tags=39%, list=16%, signal=33%	8878/7249/706/10226/11337/11152/7157/23400/84164/26100/57104/6721/23647/23192/2931/6811/27341/79065/23130/3831/11140/11331/8408/10715/2801/2011/3064/51368/51024/10013/55626/65018/10524/1459/25793/79594/27429/10645/10075/9776/7415/65992/1263
CC	GO:0032432	actin filament bundle	65	0.479577	1.8701	0.000126925	0.00755252	0.00659844	2684	tags=38%, list=20%, signal=31%	64236/2316/9260/81/7791/57175/5829/4627/7171/87/3611/1265/29109/10634/7205/23094/79784/4624/4082/59/79778/4486/2275/8572/6624
CC	GO:0034774	secretory granule lumen	290	0.328685	1.59481	0.000130127	0.00768351	0.00671287	2732	tags=33%, list=21%, signal=27%	5709/5777/6282/5580/81/2268/4125/1509/124583/5768/7040/2896/5199/3101/5315/2821/5211/240/6709/10383/2950/87/5476/1460/226/203068/23406/1265/3728/10493/6280/80142/2934/54472/29108/2512/7076/1476/11240/10120/8993/9961/54863/353/4790/5265/4758/47/54676/978/5036/8566/79169/1991/7077/51368/7423/79792/8635/671/3934/4069/566/1938/2219/5004/4353/3310/26/1675/1116/1778/710/7422/10075/7415/2171/10855/2588/…
BP	GO:0032984	protein-containing complex disassembly	184	0.370433	1.70517	0.000132445	0.00776069	0.00678031	1315	tags=23%, list=10%, signal=21%	8289/64780/57192/6604/8775/6601/79643/5119/6597/55201/2314/1201/9181/4778/832/6709/7124/6603/27183/3159/58526/6455/11344/9645/2580/1072/6749/6602/822/327/118/2934/10300/488/3831/5976/5499/6598/91782/10043/9948/6599/64601
BP	GO:0045936	negative regulation of phosphate metabolic process	333	0.319101	1.56405	0.000138512	0.00798025	0.00697213	2370	tags=27%, list=18%, signal=23%	5339/5777/5580/578/7249/23645/64780/207/1050/706/7040/79643/10636/5585/1981/25/5987/7157/1445/140885/23770/7124/2950/4035/11006/2771/409/23636/7529/58190/6992/7531/9647/2022/5518/9021/1845/29108/1032/7016/1855/2280/20/50855/58509/3315/9961/10019/84619/978/10106/3551/10507/28964/26471/79888/6895/1026/23624/51024/4067/6609/2048/3958/55861/3071/57493/25793/4298/1609/54922/3624/103/5511/55755/3725/54…
CC	GO:0005667	transcription regulator complex	415	0.306893	1.53123	0.000139311	0.00798025	0.00697213	3086	tags=32%, list=23%, signal=25%	3727/10155/51586/9112/1050/6778/6881/6688/1487/6256/3068/55957/10432/4802/7157/4778/2874/8295/3726/7376/2355/3159/10474/84164/6257/2962/5971/83463/1107/5970/3059/2033/9013/5914/8861/53635/54815/9314/2309/4005/6776/274/10025/3164/1051/10589/23468/5089/53615/7090/9328/10379/8625/28996/1388/8543/405/864/1053/10538/22809/5451/1991/7027/1869/2968/4088/1874/81857/6837/10660/7464/4772/6667/23648/1628/46…
BP	GO:0006897	endocytosis	477	0.294434	1.4847	0.000138159	0.00798025	0.00697213	2281	tags=24%, list=17%, signal=21%	10347/26020/9260/9146/7249/6844/391/5298/5199/3689/4627/55911/399687/25/1201/23166/1212/161/5880/9261/10938/7376/23396/4035/23149/60/11006/6714/10163/409/1785/6455/10859/55716/7867/8943/2580/9051/3636/79890/1175/6850/975/3265/9094/51160/10211/79958/598/177/8906/5595/2934/1455/408/23307/29108/274/9266/9784/20/113419/85377/10188/1020/1211/10043/1173/3579/2207/30835/3092/6614/23433/79872/29978/55113…
MF	GO:0019903	protein phosphatase binding	124	0.400389	1.74222	0.000140742	0.00800249	0.00699156	2663	tags=37%, list=20%, signal=30%	23645/6778/5829/22870/29888/7157/1445/54976/140885/11006/2962/10859/6992/7531/3728/8897/6548/23381/5499/9961/493/6780/3718/572/51231/5514/1436/9887/3958/9641/55626/9701/10288/7415/8877/3784/7187/9110/1003/5770/23141/2885/1432/286/1742/8572
CC	GO:0010008	endosome membrane	405	0.304502	1.51593	0.000141847	0.00800603	0.00699465	2185	tags=27%, list=17%, signal=23%	7317/10347/9146/23646/1509/57192/10066/10312/81926/23339/79643/5119/10226/79803/55630/1201/537/968/161/9744/51296/79720/527/23400/10938/27183/113178/23396/2217/4615/8216/6455/5371/23207/392/3107/10948/8943/1175/3135/9842/3665/51160/23385/3106/8906/4689/9114/388/80762/26001/79065/81609/9784/3654/20/85377/3105/91782/1211/6556/10043/148022/1173/55652/51107/23163/10397/535/155066/10454/3133/64601/553…
BP	GO:0018212	peptidyl-tyrosine modification	326	0.321852	1.57024	0.000145079	0.00812868	0.00710181	2923	tags=30%, list=22%, signal=24%	2185/5777/5605/5580/2268/2242/3570/7040/79643/7297/3689/6464/3678/25/9181/920/7157/3055/5315/1445/7124/653361/11006/6714/409/6850/3059/975/9640/9094/5518/3297/9021/5595/7016/960/8764/10188/28996/9961/10019/9148/84619/1119/9149/972/3718/25778/10507/1436/23624/4067/1636/2048/3596/5604/7132/1196/9031/8459/613/5008/9361/5526/1609/2689/2051/10645/7422/1969/1198/2041/11314/5753/4771/3643/64223/5770/448…
CC	GO:0060205	cytoplasmic vesicle lumen	293	0.325909	1.58359	0.000146469	0.00814707	0.00711788	2732	tags=33%, list=21%, signal=27%	5709/5777/6282/5580/81/2268/4125/1509/124583/5768/7040/2896/5199/3101/5315/2821/5211/240/6709/10383/2950/87/5476/1460/226/203068/23406/1265/3728/10493/6280/80142/2934/54472/29108/2512/7076/1476/11240/10120/8993/9961/54863/353/4790/5265/4758/47/54676/978/5036/8566/79169/1991/7077/51368/7423/79792/8635/671/3934/4069/566/1938/2219/5004/4353/3310/26/1675/1116/1778/710/7422/10075/7415/2171/10855/2588/…
BP	GO:0032970	regulation of actin filament-based process	322	0.3191	1.55809	0.000152348	0.00841311	0.0073503	2952	tags=31%, list=22%, signal=25%	2185/2316/5580/57175/2242/396/391/5829/4627/11151/2314/25/5987/3055/5216/5880/7408/832/6709/4035/10163/11344/116985/7226/3059/23406/3265/822/23647/9647/1265/3728/7454/118/10602/2934/8558/10093/388/29108/6548/7016/274/488/51466/29109/55114/1613/1020/9948/54961/10435/23433/389/10174/1436/54434/4088/9344/6369/23580/3071/54828/5879/7139/9463/10458/8936/54361/59/7134/1627/5881/2041/4771/5341/11135/269…
BP	GO:0042773	ATP synthesis coupled electron transport	73	-0.426792	-1.88109	0.000161811	0.0087469	0.00764194	3545	tags=49%, list=27%, signal=36%	4709/27069/51142/6391/4718/4725/1337/4724/4694/4722/9167/4695/6390/51103/1350/4697/1340/4698/54205/1716/1329/4701/4720/4700/29796/1345/4726/1738/6392/7381/4702/1347/1348/7385/11315/4711
BP	GO:0042775	mitochondrial ATP synthesis coupled electron transport	73	-0.426792	-1.88109	0.000161811	0.0087469	0.00764194	3545	tags=49%, list=27%, signal=36%	4709/27069/51142/6391/4718/4725/1337/4724/4694/4722/9167/4695/6390/51103/1350/4697/1340/4698/54205/1716/1329/4701/4720/4700/29796/1345/4726/1738/6392/7381/4702/1347/1348/7385/11315/4711
BP	GO:0032091	negative regulation of protein binding	72	0.46662	1.85949	0.000160944	0.0087469	0.00764194	2558	tags=36%, list=19%, signal=29%	8751/5580/207/10273/8536/489/60/409/2962/8189/5595/488/1855/5300/5499/2801/1026/1636/1663/3300/5465/6590/581/56998/1522/3077
BP	GO:1903131	mononuclear cell differentiation	401	0.309306	1.53811	0.000164047	0.00880579	0.00769338	2894	tags=30%, list=22%, signal=25%	2185/8289/4055/5777/10014/1209/578/6604/2242/101/678/10312/6778/6688/51341/3570/6601/4627/6597/25/920/7157/2874/10320/3726/6603/60/11006/22985/57178/10859/55716/5971/602/4242/3635/8943/54440/3135/7226/51043/6850/3665/6602/3566/2033/5914/64218/3561/177/3106/2309/80762/677/10945/1051/4066/3965/8993/6598/3707/973/2207/972/864/3718/6599/572/10538/55365/5293/1436/4067/2194/604/3659/4772/55626/6777/740…
CC	GO:0045171	intercellular bridge	73	0.456846	1.83118	0.000170234	0.00901183	0.00787339	3273	tags=44%, list=25%, signal=33%	1639/64780/27128/63935/5768/10383/10381/203068/9094/79650/2101/14/8625/2944/2946/26471/2947/11188/23187/947/11021/2948/84861/10297/1135/10562/29781/22994/347733/10382/60509/10039
BP	GO:0071219	cellular response to molecule of bacterial origin	188	0.373104	1.72031	0.000170216	0.00901183	0.00787339	2495	tags=31%, list=19%, signal=26%	10318/207/6688/706/22904/7040/4792/7431/4793/25/968/3055/11027/3661/140885/7124/2950/4615/6714/10859/7133/5970/7538/5914/3297/5595/59307/29108/10594/54623/1051/3654/5976/58509/4790/148022/79155/23328/9572/1053/8106/28964/4067/2048/671/6348/613/10288/6915/949/57817/1019/2693/445/4843/10270/8140/1432/92140
BP	GO:0032496	response to lipopolysaccharide	284	0.328891	1.5905	0.000180008	0.009464	0.00826845	2595	tags=28%, list=20%, signal=23%	3727/10318/207/6688/706/22904/7040/4792/7431/4793/25/968/3055/11027/3661/140885/9261/7124/2950/4615/5739/6714/10859/7867/7133/5970/7538/5914/6280/3297/5595/59307/29108/10594/3164/54623/1051/3654/5976/3965/58509/6556/4790/148022/79155/23328/9572/1053/8106/1991/28964/4067/1636/2048/3596/671/5027/4353/6348/613/4851/10288/6915/949/57817/6590/1019/5106/2693/445/8792/4843/10270/8140/1432/92140/2353/406…
BP	GO:0060326	cell chemotaxis	273	0.331559	1.59496	0.000181622	0.00948387	0.0082858	3294	tags=33%, list=25%, signal=26%	2185/5339/25865/5580/23765/63940/57175/101/391/1441/6688/3570/3689/11151/5880/240/51157/23396/682/728/409/79890/7226/6850/80024/6280/5595/4363/811/3164/63916/3603/11240/3965/3315/3579/4814/2207/972/5293/1436/7423/4067/2867/3958/6369/1113/566/7409/6348/3071/4354/2155/5879/4851/8394/7422/1969/1230/59341/79647/27202/2829/5365/1399/8792/27237/8817/10663/2621/10488/1907/4192/2919/5025/64127/1398/8729/…
BP	GO:0071356	cellular response to tumor necrosis factor	188	0.37182	1.71438	0.000185551	0.00962357	0.00840786	3639	tags=43%, list=27%, signal=32%	2185/81/28511/207/678/1050/4792/9181/7157/2874/7124/2950/10365/7133/3611/5970/6850/7538/5595/2309/677/29108/10594/8764/58509/8904/4790/9572/7293/3551/4772/6369/10670/7132/6348/4654/1116/56928/8737/8877/57817/7187/5106/445/3303/8792/970/1432/51588/9825/2353/335/8718/8996/3875/8372/2621/11093/672/5516/81858/2852/1277/10068/204851/820/7185/10401/11173/6868/8717/5594/958/51763/7805/6517/60401/3576/83…
BP	GO:1902107	positive regulation of leukocyte differentiation	165	0.36415	1.64658	0.000191503	0.00973029	0.00850109	2062	tags=29%, list=16%, signal=25%	8289/6604/2242/101/7040/6601/6597/920/7124/6603/60/11006/22985/57178/3635/8943/54440/3135/51043/6850/3059/6602/3566/5914/3297/3561/177/2309/677/3965/6598/3707/972/864/6599/572/604/55626/6777/9092/3071/10524/6469/10288/9398/8737/1230/7305
BP	GO:1903708	positive regulation of hemopoiesis	165	0.36415	1.64658	0.000191503	0.00973029	0.00850109	2062	tags=29%, list=16%, signal=25%	8289/6604/2242/101/7040/6601/6597/920/7124/6603/60/11006/22985/57178/3635/8943/54440/3135/51043/6850/3059/6602/3566/5914/3297/3561/177/2309/677/3965/6598/3707/972/864/6599/572/604/55626/6777/9092/3071/10524/6469/10288/9398/8737/1230/7305
BP	GO:0010506	regulation of autophagy	272	0.32784	1.57906	0.000189129	0.00973029	0.00850109	2526	tags=33%, list=19%, signal=27%	7942/826/7249/207/706/5768/11152/1981/25/5127/1201/5987/7157/527/23400/5476/6829/51322/3162/6721/823/23265/2033/6625/5566/56834/5595/8897/2309/2931/10919/9114/29108/23130/3607/5660/9817/1613/11180/8408/9681/3315/26073/1020/11178/10043/148022/10715/535/155066/572/60673/2801/3064/29978/26471/8517/10013/55626/6048/10670/65018/6794/10524/1459/25793/54922/27429/10645/58528/9776/8131/9830/1263/23274/52…
BP	GO:0002237	response to molecule of bacterial origin	297	0.323392	1.57316	0.000194817	0.00973029	0.00850109	2595	tags=28%, list=20%, signal=23%	3727/10318/207/6688/706/22904/7040/4792/7431/4793/25/968/3055/11027/3661/140885/9261/7124/2950/4615/728/5739/6714/10859/7867/7133/5970/7538/5914/6280/3297/5595/59307/29108/10594/3164/54623/1051/3654/5976/3663/3965/58509/6556/4790/148022/79155/23328/9572/1053/8106/1991/28964/64170/4067/1636/2048/3596/671/5027/4353/6348/613/4851/10288/6915/949/57817/6590/1019/5106/2693/445/8792/4843/10270/8140/1432…
MF	GO:0030695	GTPase regulator activity	344	0.311009	1.52461	0.000195214	0.00973029	0.00850109	1820	tags=22%, list=14%, signal=20%	26000/23550/393/7249/63940/5905/396/6494/27128/29/51291/50619/10636/2664/4924/9181/2874/9744/140885/79735/9826/9138/54662/11033/5739/9909/392/116985/6305/79890/9605/5900/2873/55357/9754/7454/79958/4650/22898/8498/408/9267/9266/55114/84364/3257/259173/10188/9922/9681/10235/27352/2889/8567/50807/10435/28964/54869/23094/6904/23637/7204/9610/5863/23258/22821/9844/7409/26037/3071/23061/26297/10113/798…
MF	GO:0060589	nucleoside-triphosphatase regulator activity	344	0.311009	1.52461	0.000195214	0.00973029	0.00850109	1820	tags=22%, list=14%, signal=20%	26000/23550/393/7249/63940/5905/396/6494/27128/29/51291/50619/10636/2664/4924/9181/2874/9744/140885/79735/9826/9138/54662/11033/5739/9909/392/116985/6305/79890/9605/5900/2873/55357/9754/7454/79958/4650/22898/8498/408/9267/9266/55114/84364/3257/259173/10188/9922/9681/10235/27352/2889/8567/50807/10435/28964/54869/23094/6904/23637/7204/9610/5863/23258/22821/9844/7409/26037/3071/23061/26297/10113/798…
MF	GO:0004674	protein serine/threonine kinase activity	340	0.314926	1.54251	0.000198761	0.00984316	0.0085997	3159	tags=37%, list=24%, signal=29%	2185/2870/5605/25865/5580/8878/207/8536/5585/6793/5127/10295/57787/9261/896/6195/8986/50488/3985/1460/7867/3611/10494/2580/23031/208/6850/23476/4296/2022/9064/5566/5595/8558/1455/10922/2931/7016/6046/1018/11184/3654/1613/1025/10188/8408/28996/1020/5261/9578/369/5871/8425/5598/818/9149/728642/6199/5681/2011/2872/51231/25778/3551/54101/7204/5129/9344/90956/5604/9641/1453/6348/4261/6196/65018/1196/6…
BP	GO:0030041	actin filament polymerization	127	0.405041	1.77207	0.000200542	0.00986769	0.00862113	2381	tags=33%, list=18%, signal=27%	2185/5580/1729/11151/2314/25/3055/51734/5216/7408/832/6709/11344/9051/3059/23406/822/7454/118/10602/2934/10093/29108/274/51466/54961/79585/10435/54434/6369/23580/3071/5879/10458/8936/1627/11135/26999/64223/50853/79778/2885
CC	GO:0031983	vesicle lumen	295	0.32458	1.57712	0.000206711	0.0101064	0.00882972	2732	tags=33%, list=21%, signal=27%	5709/5777/6282/5580/81/2268/4125/1509/124583/5768/7040/2896/5199/3101/5315/2821/5211/240/6709/10383/2950/87/5476/1460/226/203068/23406/1265/3728/10493/6280/80142/2934/54472/29108/2512/7076/1476/11240/10120/8993/9961/54863/353/4790/5265/4758/47/54676/978/5036/8566/79169/1991/7077/51368/7423/79792/8635/671/3934/4069/566/1938/2219/5004/4353/3310/26/1675/1116/1778/710/7422/10075/7415/2171/10855/2588/…
BP	GO:0036230	granulocyte activation	40	0.539338	1.91419	0.000211251	0.010206	0.00891667	2200	tags=42%, list=17%, signal=36%	5580/6813/6844/6688/2896/3689/11027/7124/4615/6850/3579/2207/6348/6810/613/7305/11314
BP	GO:0044089	positive regulation of cellular component biogenesis	395	0.300819	1.4936	0.000211405	0.010206	0.00891667	2972	tags=32%, list=22%, signal=26%	10155/2185/1639/9146/578/2242/997/5829/7040/4926/10273/4478/11152/1981/25/57787/7157/3055/5216/5880/7408/7124/23400/27183/7376/4615/9780/6714/10163/1785/23636/11344/116985/9842/6850/3265/9647/10211/64218/10602/3297/22883/29108/7016/274/23130/51466/29109/8408/26073/22880/9148/50807/10435/23433/389/3064/10174/10507/28964/54869/4204/4088/5064/81857/2048/9746/3958/5027/55626/84722/6369/7879/1113/2358…
BP	GO:0031532	actin cytoskeleton reorganization	91	0.424954	1.75276	0.000215743	0.0103503	0.00904274	2682	tags=36%, list=20%, signal=29%	2185/5339/2316/2242/396/4627/6464/25/3055/50488/116985/7226/3059/3265/2934/1613/1020/9578/1436/29780/11132/26037/54828/8394/10458/59341/5341/5770/79778/2885/5058/8572/3645
BP	GO:0018108	peptidyl-tyrosine phosphorylation	324	0.321385	1.56927	0.000222363	0.0106016	0.00926234	2923	tags=30%, list=22%, signal=24%	2185/5777/5605/5580/2268/2242/3570/7040/79643/7297/3689/6464/3678/25/9181/920/7157/3055/5315/1445/7124/653361/11006/6714/409/6850/3059/975/9640/9094/5518/3297/9021/5595/7016/960/8764/10188/28996/9961/10019/9148/84619/1119/9149/972/3718/25778/10507/1436/23624/4067/1636/2048/3596/5604/7132/1196/9031/613/5008/9361/5526/1609/2689/2051/10645/7422/1969/1198/2041/11314/5753/4771/3643/64223/5770/4486/204…
CC	GO:0098798	mitochondrial protein-containing complex	188	-0.323121	-1.65824	0.000226271	0.0107214	0.00936696	2919	tags=40%, list=22%, signal=32%	51023/63875/1337/4724/51318/4694/10845/83447/63899/65003/28957/100287932/4722/64975/9167/10884/4695/8050/5162/1737/23107/51650/11232/6390/51103/1350/10240/56922/594/25874/9801/10440/4697/3032/51660/1340/4698/8801/3313/65080/60488/55052/51021/1629/1329/26515/4701/55669/29074/139322/11222/29093/55037/4720/3419/4700/29796/1345/55750/63931/4726/79135/1738/6392/78988/7381/4702/56945/1347/9804/7818/134…
MF	GO:0090079	translation regulator activity, nucleic acid binding	81	-0.408713	-1.82169	0.000230895	0.0108733	0.00949973	2493	tags=40%, list=19%, signal=32%	23708/1937/8665/10767/9669/10987/54505/1967/8562/8891/8894/1975/8892/1968/1977/2107/8669/64506/4528/28985/8664/1965/1617/10480/9470/1983/1915/1933/51386/1974/3646/8667
BP	GO:2000630	positive regulation of miRNA metabolic process	46	0.533918	1.94558	0.000232728	0.0108928	0.00951673	2695	tags=43%, list=20%, signal=35%	6688/7040/6597/7157/7124/7376/6721/5970/3265/23053/9314/2309/4790/4088/3725/2113/7015/2353/1958/8061
CC	GO:0005775	vacuolar lumen	150	0.379978	1.68872	0.000234615	0.0109146	0.00953576	2099	tags=29%, list=16%, signal=25%	5580/23646/4125/1509/2548/2896/1200/10383/23400/5476/3425/203068/6448/10493/80142/54472/3423/29108/2512/138050/5660/11240/4669/1508/4758/47/972/5036/1991/9672/6609/8635/671/4069/566/4353/53/3073/1778/8722/7415/2171/10855/2588
BP	GO:1902905	positive regulation of supramolecular fiber organization	150	0.379546	1.6868	0.000244191	0.0112916	0.00986518	2843	tags=35%, list=21%, signal=28%	2185/1639/2242/5829/4926/25/5987/3055/5216/7408/10163/9647/7454/10602/2934/29108/7016/10300/274/51466/29109/9948/10435/389/10174/28964/4204/4088/79709/84722/6369/23580/3071/7148/5879/10458/55755/8936/54361/59341/2041/4771/5341/11135/64223/3303/2885/335/5058/11075/6281/673/2876
BP	GO:0031331	positive regulation of cellular catabolic process	306	0.317605	1.54751	0.000252646	0.0116126	0.0101457	2560	tags=31%, list=19%, signal=25%	2185/7942/5580/7249/207/28952/101/678/1050/10273/11337/11152/4849/5127/5987/127544/7124/79016/8570/10444/51343/6829/51322/57104/7133/3162/208/7832/7538/23053/9567/5886/3297/6449/5595/2309/2931/677/23130/1855/57154/9817/215/20/5976/56478/8408/9681/5261/10043/148022/10715/8078/405/572/60673/3064/10425/29978/26058/23640/8517/5027/55626/5045/1453/65018/6794/10524/25793/10645/54915/9776/7415/8131/9830…
BP	GO:0016052	carbohydrate catabolic process	130	0.395461	1.73513	0.00025702	0.0117434	0.0102599	2451	tags=32%, list=19%, signal=26%	2548/7167/11182/51341/3101/7157/5315/2821/5211/4967/226/2033/5226/4668/2931/3607/2584/5499/3098/5261/4758/405/5207/572/2592/28964/26471/4123/5027/5313/5214/2529/11181/5465/3643/64223/5834/2760/2526/5223/6652
BP	GO:0050727	regulation of inflammatory response	299	0.319089	1.55137	0.000264065	0.0119939	0.0104787	2204	tags=25%, list=17%, signal=21%	5580/23765/2268/63940/7791/10318/79651/101/1050/22904/4792/2896/3055/3661/2874/240/140885/7124/2950/653361/4615/6714/7133/2678/5970/22861/6850/975/23476/7538/6280/9021/177/8314/9314/4363/80762/29108/25807/1051/3603/8993/5335/4790/4814/5598/9572/3133/1991/28964/4088/79671/26471/4067/1636/2867/3596/604/5045/6369/6777/7132/6348/613/5008/2529/2294/747/8737/59341/8877/57817/5465/4318
CC	GO:0030427	site of polarized growth	135	0.391732	1.72391	0.000277604	0.0125346	0.0109512	2737	tags=35%, list=21%, signal=28%	2185/2316/80228/393/11336/25/2288/51393/6714/1785/11344/10381/1072/23265/3059/81544/23307/9513/10300/10280/9266/3831/1855/23162/1020/10540/55361/9344/10409/79784/65018/1500/2596/59341/22853/1627/5881/6792/7786/50861/27124/1314/23046/6624/7070/55811/11075
BP	GO:0006325	chromatin organization	428	0.296476	1.48213	0.000283744	0.012737	0.0111279	1787	tags=21%, list=14%, signal=19%	10155/10445/8289/10014/6604/22992/7917/10362/1616/9112/6688/51341/1487/8535/6601/6597/5585/29890/23030/9810/5987/79903/4778/8815/8295/10320/23135/6603/83444/3159/60/6830/23558/9757/57680/473/51322/10365/9275/9274/1107/55723/5970/6749/11176/23476/57798/6602/2033/8314/8242/8019/54815/55257/2931/10919/10498/339287/6046/23468/23569/53615/11240/6015/1613/3054/27005/9130/6598/79711/22880/55209/4524/400…
BP	GO:0032212	positive regulation of telomere maintenance via telomerase	30	-0.562682	-2.02845	0.000286532	0.0127873	0.0111719	882	tags=40%, list=7%, signal=37%	5588/545/908/472/10575/140609/25913/22948/10576/7520/10694/3178
BP	GO:0002697	regulation of immune effector process	314	0.311792	1.52121	0.000294754	0.0130782	0.0114261	1906	tags=25%, list=14%, signal=22%	5777/6813/2268/2242/6778/6688/7040/9466/2896/5199/3689/5585/399687/5880/2821/9261/3726/7124/653361/11006/4615/6830/409/10859/7133/54440/3162/3135/51043/6850/975/3566/7454/5914/177/3106/80762/29108/3965/3105/11331/8764/3098/8993/148022/8741/972/3718/3133/10538/7293/79004/55198/56848/79671/64170/4067/2048/2867/3596/3383/604/3958/3134/5027/6777/3916/7409/2219/5817/3071/9437/6810/613/2529/710/2294
BP	GO:0032635	interleukin-6 production	122	0.397627	1.72864	0.000308148	0.0135162	0.0118088	2260	tags=32%, list=17%, signal=27%	5777/23765/3570/9466/9181/11027/1445/140885/9261/7124/11006/4615/409/10365/3635/6850/177/3106/408/29108/4155/1051/3603/3965/148022/972/5452/56848/79671/64170/671/5027/5004/3071/10288/7305/59341/27202/2693
BP	GO:0032675	regulation of interleukin-6 production	122	0.397627	1.72864	0.000308148	0.0135162	0.0118088	2260	tags=32%, list=17%, signal=27%	5777/23765/3570/9466/9181/11027/1445/140885/9261/7124/11006/4615/409/10365/3635/6850/177/3106/408/29108/4155/1051/3603/3965/148022/972/5452/56848/79671/64170/671/5027/5004/3071/10288/7305/59341/27202/2693
MF	GO:0001222	transcription corepressor binding	35	0.558049	1.91791	0.000325024	0.0141142	0.0123312	2569	tags=49%, list=19%, signal=39%	23625/10014/51341/1487/3068/10919/80764/864/9572/604/10013/8237/1488/58525/2113/8841/6496
BP	GO:0019646	aerobic electron transport chain	67	-0.429184	-1.88185	0.000330176	0.0141142	0.0123312	3147	tags=46%, list=24%, signal=35%	4718/4725/1337/4724/4694/4722/9167/4695/6390/51103/1350/4697/1340/4698/54205/1329/4701/4720/4700/29796/1345/4726/1738/6392/7381/4702/1347/1348/7385/11315/4711
BP	GO:0050728	negative regulation of inflammatory response	122	0.396491	1.72369	0.000330973	0.0141142	0.0123312	3135	tags=40%, list=24%, signal=31%	5580/2268/79651/2896/3055/2874/240/140885/2950/6714/7133/6850/7538/9021/9314/80762/8993/5335/4790/5598/9572/1991/28964/4088/79671/4067/3596/5045/7132/613/2294/57817/5465/2693/1003/1432/335/4598/2876/81858/4192/54/325/64127/2852/8530/3949/134/55870
BP	GO:0045619	regulation of lymphocyte differentiation	178	0.357549	1.63431	0.000330232	0.0141142	0.0123312	2014	tags=28%, list=15%, signal=24%	8289/5777/1209/6604/101/678/6601/6597/25/3726/6603/60/11006/57178/3635/8943/54440/3135/51043/6850/6602/3566/5914/3561/2309/80762/677/3965/8993/6598/3707/972/864/3718/6599/572/10538/604/3659/55626/6777/9092/3071/10524/25793/6469/3624/10288/1493
BP	GO:0050863	regulation of T cell activation	315	0.315833	1.54097	0.000328269	0.0141142	0.0123312	1787	tags=22%, list=14%, signal=19%	8289/2319/5777/1209/6604/207/101/6601/9466/7297/6597/11151/25/920/5880/1445/140885/3726/6603/23149/60/11006/6714/57178/10859/8943/7133/54440/3135/51043/6850/975/6602/3566/5914/3561/177/2309/1845/80762/29108/1051/10326/1947/3965/3105/8764/6598/3707/30835/972/864/3718/3133/6599/572/10538/4067/8379/604/3958/3659/55626/6777/7409/9092/3071/1725/10524
BP	GO:0034612	response to tumor necrosis factor	204	0.345703	1.61285	0.000346025	0.0146745	0.0128207	3639	tags=42%, list=27%, signal=31%	2185/81/28511/207/678/1050/4792/9181/7157/2874/7124/2950/10365/7133/3611/5970/6850/7538/5595/2309/677/29108/10594/4155/8764/58509/8904/4790/9572/7293/3551/6609/4772/6369/10670/7132/6348/4654/1116/56928/8737/8877/57817/7187/5106/445/3303/8792/970/1432/51588/9825/2353/335/8718/8996/3875/8372/2621/2021/11093/672/5516/81858/2852/929/1277/10068/204851/820/7185/10401/11173/6868/8717/5594/958/51763/7805…
BP	GO:0046939	nucleotide phosphorylation	86	0.421228	1.7286	0.000353261	0.0147371	0.0128754	2402	tags=31%, list=18%, signal=26%	7167/11182/51341/3101/5315/2821/5211/11284/4833/4967/226/2033/3607/2584/3098/405/5207/28964/26471/5027/4832/5313/5214/5465/3643/64223/5223
MF	GO:0004713	protein tyrosine kinase activity	126	0.387349	1.68918	0.000352661	0.0147371	0.0128754	3077	tags=37%, list=23%, signal=29%	2185/5605/5580/2268/2242/7297/25/3055/5315/1445/6714/6850/7016/10188/28996/1119/9149/3718/25778/1436/4067/2048/5604/1196/9031/613/1944/2051/10645/1969/1198/2041/5753/3643/4486/2049/7075/1859/1945/3645/4145/8576/2261/2324/10420/204851/3482
BP	GO:0005975	carbohydrate metabolic process	475	0.290285	1.46353	0.000352333	0.0147371	0.0128754	2452	tags=25%, list=19%, signal=22%	2185/2539/4125/2548/207/7167/11182/51341/7040/3101/10295/7157/5315/2821/1431/5211/23038/25796/7124/23193/6714/3425/11253/4967/226/26229/51172/3636/208/3421/6576/5973/3418/2033/9526/5226/4668/3705/7841/9334/27090/2931/1642/54344/7165/3607/9761/7355/217/50515/2997/64847/2584/5499/3098/5261/8703/3632/92579/51005/4790/4758/55741/3651/405/6483/5207/9572/572/55501/3613/2592/28964/4204/9435/26471/51094/…
BP	GO:0032986	protein-DNA complex disassembly	18	0.686925	2.01868	0.000364746	0.015098	0.0131907	1310	tags=61%, list=10%, signal=55%	8289/6604/6601/6597/4778/6603/3159/6749/6602/6598/6599
BP	GO:0007009	plasma membrane organization	114	0.406089	1.74075	0.000365844	0.015098	0.0131907	1971	tags=28%, list=15%, signal=24%	5339/10347/5580/207/79643/5119/4627/1201/27183/1785/23207/208/10211/6280/2934/274/79065/488/8291/215/85377/91782/10397/50807/55113/309/6609/9368/5027/6810/55909/10458
BP	GO:0097553	calcium ion transmembrane import into cytosol	152	0.377364	1.68429	0.000373215	0.0153198	0.0133845	3210	tags=34%, list=24%, signal=26%	2185/2316/5777/578/57192/1729/11151/25/51393/5371/7226/80024/5566/2280/10523/5335/493/54923/3064/2906/2946/2812/22821/4067/6261/3596/5023/5027/6348/3954/5031/2902/59341/2829/801/581/773/53373/2815/8996/7070/784/2904/5024/5025/2852/5319/1813/57158/779/6543/3932
BP	GO:0010507	negative regulation of autophagy	68	0.468715	1.8471	0.000380127	0.0153571	0.0134171	2448	tags=35%, list=18%, signal=29%	7249/207/706/5768/1981/7157/5476/3162/6625/10919/3607/11180/26073/11178/2801/26471/6048/10670/65018/54922/23274/64223/84861/8140
BP	GO:0045582	positive regulation of T cell differentiation	107	0.398318	1.69731	0.000376849	0.0153571	0.0134171	2006	tags=32%, list=15%, signal=27%	8289/6604/101/6601/6597/6603/60/11006/57178/8943/54440/3135/51043/6850/6602/3566/5914/3561/2309/3965/6598/3707/972/864/6599/572/604/55626/6777/9092/3071/10524/6469/10288
BP	GO:0001818	negative regulation of cytokine production	234	0.338241	1.60599	0.000379627	0.0153571	0.0134171	2668	tags=31%, list=20%, signal=25%	5777/706/7040/9466/5987/1445/9454/8815/140885/7124/8986/2950/11006/409/5371/10859/5971/602/10365/3635/6992/3162/7538/5914/177/59307/408/9314/80762/29108/215/3965/58509/8993/6556/4790/55666/3718/1991/79004/28964/55198/79671/2048/3596/671/604/3134/5045/5004/3071/10524/5879/79594/3624/51564/1969/947/7305/27202/5465/2693/9683/5553/336/10270/4092/3077/335/4940/5678/26146
BP	GO:0000470	maturation of LSU-rRNA	23	-0.605184	-2.03462	0.000387284	0.0153628	0.0134221	1053	tags=43%, list=8%, signal=40%	55759/54680/26156/10412/51018/80135/6130/9326/8886/6129
BP	GO:0048010	vascular endothelial growth factor receptor signaling pathway	46	0.522538	1.90411	0.000387983	0.0153628	0.0134221	2919	tags=41%, list=22%, signal=32%	2185/25865/9146/3678/9261/6714/7867/3315/405/7423/7409/7410/7422/5770/1432/8817/5062/11117/2324
BP	GO:0071674	mononuclear cell migration	170	0.356757	1.62071	0.000386942	0.0153628	0.0134221	2400	tags=26%, list=18%, signal=21%	2185/5339/3683/207/101/6688/3570/9466/11151/4478/6793/25/240/140885/7124/728/3695/7226/80024/4267/177/5595/811/29108/11240/3965/8764/3579/5293/1436/4067/3383/3958/6369/6348/2529/9048/84830/1230/59341/79647/1399/8792/2526
MF	GO:0045296	cadherin binding	282	0.320649	1.55067	0.000388274	0.0153628	0.0134221	2357	tags=29%, list=18%, signal=24%	56904/5339/2316/79180/6282/11336/5905/57175/53827/4627/10226/5315/5093/5216/7094/7408/832/6709/8407/11313/10938/682/6714/10163/6455/392/7529/11344/226/9973/7531/55357/822/3337/23647/1265/3728/118/6811/7706/11273/85377/54862/5297/5499/22827/3054/55898/11187/3069/10397/10652/50807/23164/2801/2011/3927/26058/54869/2194/5331/1938/1453/5214/57142/1500/10726/64837/9230/8502/10458/1969/1627/11135/23513/…
MF	GO:0050839	cell adhesion molecule binding	466	0.290324	1.46265	0.000400744	0.0157749	0.0137821	2917	tags=29%, list=22%, signal=23%	56904/5339/2316/79180/5034/5777/8751/6282/81/11336/5905/57175/3683/101/53827/3689/4627/3678/10226/4478/5315/5093/5216/7094/7408/832/140885/6709/8407/11313/10938/682/87/6714/10163/6455/392/7529/11344/226/3695/9973/7531/6850/975/55357/822/3337/23647/1265/3728/118/811/6811/3385/7106/7706/11273/85377/54862/5297/5499/22827/3054/55898/11187/8425/4814/3069/10397/10652/50807/23164/2801/2011/3687/3927/260…
CC	GO:0035060	brahma complex	13	0.739805	1.96838	0.000412088	0.0161387	0.0141	1310	tags=62%, list=10%, signal=56%	8289/6604/6601/6603/60/6602/6598/6599
BP	GO:0006165	nucleoside diphosphate phosphorylation	84	0.422189	1.72593	0.00042122	0.0164126	0.0143393	2402	tags=31%, list=18%, signal=25%	7167/11182/51341/3101/5315/2821/5211/4833/4967/226/2033/3607/2584/3098/405/5207/28964/26471/5027/4832/5313/5214/5465/3643/64223/5223
CC	GO:0098576	lumenal side of membrane	25	0.612573	1.94248	0.000427888	0.0165049	0.0144199	1931	tags=44%, list=15%, signal=38%	6892/5476/3107/3135/3106/811/3105/972/3133/3134/56928
MF	GO:0140640	catalytic activity, acting on a nucleic acid	402	-0.252297	-1.42862	0.000426047	0.0165049	0.0144199	2667	tags=30%, list=20%, signal=25%	64794/1654/23395/51110/8732/9937/4848/2956/1655/5985/51163/283/11201/10728/1105/55006/29102/10111/79009/8438/563/5928/9044/29104/1763/23064/54505/64421/29063/51651/8634/55278/11232/51067/6419/64848/54901/23626/6894/5073/201626/10621/23404/5983/10436/10352/4436/9156/11062/79068/57038/6996/5422/64863/1787/1660/51106/2091/5984/1662/60625/55703/5557/10973/5884/29883/27030/55661/10146/112479/11102/596…
CC	GO:0030426	growth cone	130	0.385771	1.69261	0.000438606	0.0168337	0.0147071	2737	tags=35%, list=21%, signal=28%	2185/2316/80228/393/11336/25/2288/51393/6714/1785/11344/10381/1072/23265/81544/23307/9513/10300/10280/9266/3831/1855/23162/1020/10540/9344/10409/79784/65018/1500/2596/59341/22853/1627/5881/6792/7786/50861/27124/1314/23046/6624/7070/55811/11075
BP	GO:2000628	regulation of miRNA metabolic process	63	0.475134	1.84958	0.000452642	0.017286	0.0151023	2695	tags=40%, list=20%, signal=32%	6688/7040/6597/7157/7124/7376/11006/6721/5970/3265/23053/5914/9314/2309/4790/57473/4088/3725/5465/4775/2113/7015/2353/1958/8061
MF	GO:0004683	calmodulin-dependent protein kinase activity	22	0.648856	1.99294	0.000459292	0.0174531	0.0152483	2142	tags=50%, list=16%, signal=42%	2185/8536/9261/7867/5261/818/2872/8569/10645/3706/816
MF	GO:0031490	chromatin DNA binding	89	0.42657	1.75201	0.000465811	0.0176136	0.0153886	1899	tags=31%, list=14%, signal=27%	81/1050/22904/6601/6597/23135/6603/7376/60/23558/5970/2033/5914/3297/8314/9314/2309/1051/53615/6598/6599/4088/7067/9878/604/92822/4654/4851
MF	GO:0043621	protein self-association	56	0.485244	1.85028	0.000471757	0.017751	0.0155086	1733	tags=32%, list=13%, signal=28%	2185/5339/6844/101/25/7157/256364/4615/22861/8861/3297/6449/29109/51614/8636/64170/9368/24139
BP	GO:0008630	intrinsic apoptotic signaling pathway in response to DNA damage	88	0.427364	1.75969	0.000480696	0.0179991	0.0157254	1998	tags=34%, list=15%, signal=29%	578/7917/25/7157/7124/5371/602/7133/3162/2033/599/598/29108/1032/27141/960/28996/138151/972/572/5883/1869/26471/79073/1026/9641/1396/7132/27429/1969
BP	GO:1902893	regulation of miRNA transcription	56	0.483143	1.84226	0.000485945	0.0180199	0.0157435	2695	tags=39%, list=20%, signal=31%	6688/7040/6597/7157/7124/7376/11006/6721/5970/5914/9314/2309/57473/4088/3725/5465/4775/2113/7015/2353/1958/8061
BP	GO:1902806	regulation of cell cycle G1/S phase transition	151	0.364779	1.622	0.000485744	0.0180199	0.0157435	1488	tags=24%, list=11%, signal=21%	8289/5777/6604/207/6601/6597/1981/10263/7157/10197/896/6603/60/5371/51322/56257/58190/9275/9274/6602/79447/8558/9314/1032/54623/11331/6598/493/138151/6599/10106/7027/55198/26058/1869/1026
BP	GO:0002573	myeloid leukocyte differentiation	184	0.354237	1.63062	0.000492225	0.018165	0.0158703	2452	tags=30%, list=19%, signal=25%	4055/2242/1050/10312/6688/10370/22904/7040/4627/920/537/3726/7124/11006/6714/22985/10859/5971/11025/3635/3059/975/3665/5914/3297/8314/56834/7030/80762/677/1051/2101/972/1053/10538/5293/1436/4067/2194/6348/10766/3624/7422/1969/9398/8737/1230/7305/3204/3725/4318/6988/8792/56998/54997/1432
BP	GO:0044843	cell cycle G1/S phase transition	209	0.339908	1.58731	0.000505151	0.0185528	0.0162091	2517	tags=30%, list=19%, signal=25%	8289/5777/6604/207/997/6881/6601/6597/1981/5127/10263/7157/10197/896/6603/60/5371/51322/56257/58190/9275/9274/23476/4296/6602/79447/1978/8558/9314/1032/1018/54623/11331/1020/6598/493/138151/6599/10106/7027/55198/26058/1869/1026/5129/1874/898/55626/25799/25793/3624/65992/1263/1019/595/29933/5426/4221/8328/25959/23133/7015/9032
BP	GO:0032535	regulation of cellular component size	289	0.314495	1.52411	0.000509711	0.0186312	0.0162775	2477	tags=26%, list=19%, signal=22%	2185/393/5580/23645/11151/4478/2664/2314/25/1201/3055/51393/5216/7408/832/23038/6709/23400/29882/2647/1785/11344/79890/3059/23406/822/7454/118/64218/10602/56996/2934/10093/29108/274/51466/57154/5499/8408/1020/1173/9948/54961/10435/2055/10507/54910/54434/1874/9368/10723/5027/6369/7409/23580/3071/7410/57142/5879/10458/7422/11194/59341/1627/6343/6792/5341/11135/26999/64223/50853/2885/9706/23616/6560…
BP	GO:0051345	positive regulation of hydrolase activity	459	0.286069	1.43937	0.000521543	0.0189733	0.0165765	2576	tags=26%, list=19%, signal=22%	2185/26000/25865/5580/578/7249/5905/23645/1509/207/6494/29/391/51291/2896/10636/489/2769/79735/10197/7124/11047/54662/7376/11033/728/5371/116985/208/22861/6850/5900/55357/3265/9647/6280/3297/5330/23385/177/2934/29108/8698/274/4155/5300/5660/27141/3965/11331/9170/9922/10235/51107/27352/2889/3092/50807/572/389/51231/10507/23094/23637/4088/5863/51024/64170/4067/57333/1857/5023/10316/6369/7409/26037/…
BP	GO:0007040	lysosome organization	71	0.459789	1.82914	0.000535629	0.0192126	0.0167855	1746	tags=32%, list=13%, signal=28%	7942/2548/10312/5298/79643/5119/2896/11151/1201/537/1200/527/51172/3257/91782/4669/535/2055/9296/5027/7879/53/3073
BP	GO:0080171	lytic vacuole organization	71	0.459789	1.82914	0.000535629	0.0192126	0.0167855	1746	tags=32%, list=13%, signal=28%	7942/2548/10312/5298/79643/5119/2896/11151/1201/537/1200/527/51172/3257/91782/4669/535/2055/9296/5027/7879/53/3073
BP	GO:0006338	chromatin remodeling	240	0.330295	1.57687	0.000534041	0.0192126	0.0167855	1787	tags=23%, list=14%, signal=20%	10155/10445/8289/10014/6604/1616/9112/51341/1487/6601/6597/23030/79903/4778/23135/6603/83444/3159/60/6830/23558/57680/473/9275/9274/1107/55723/6749/11176/23476/57798/6602/2033/8242/8019/54815/6046/23569/53615/11240/3054/6598/22880/4524/4000/6599/56848/4204/4798/100129583/22955/22893/2186/9031/10524
BP	GO:0042176	regulation of protein catabolic process	281	0.316173	1.52774	0.000550027	0.0195463	0.0170771	2566	tags=32%, list=19%, signal=26%	5709/2316/9146/8263/7917/207/101/1050/79643/91304/10273/1471/4478/11337/51035/9810/127544/10197/7124/23400/79016/4035/5476/10444/51343/51322/112398/7133/5970/975/51160/6625/5886/6449/5566/2931/80762/1642/9191/6811/7076/25807/1855/5300/9817/20/4947/369/9491/27352/23163/8078/8742/6599/27351/7077/10425/29978/23640/4088/26471/79888/5045/7879/1453/65018/23450/6469/10869/7415/65992/1263/3300/5704/57817…
CC	GO:0099513	polymeric cytoskeletal fiber	494	0.284911	1.44149	0.000547917	0.0195463	0.0170771	2689	tags=26%, list=20%, signal=22%	64236/5339/254102/1639/393/5605/9260/64780/57175/9112/1729/4926/79643/5119/10636/54867/11151/7431/55201/11337/9181/10263/256364/3055/2288/5880/10383/7171/60/87/6714/58526/1785/11344/10381/9051/203068/8514/3059/440915/4296/23406/3728/147179/7454/10844/4650/2931/10376/7283/29108/10300/7461/3831/1855/7278/9817/10634/7203/1020/91782/3881/83658/23623/10397/4000/84790/10540/2801/2011/4640/9654/23433/51…
BP	GO:0043300	regulation of leukocyte degranulation	44	0.511945	1.84854	0.000599021	0.0211893	0.0185125	1906	tags=43%, list=14%, signal=37%	6813/2268/2242/6688/3689/5880/3162/6850/3566/3965/56848/4067/3596/3134/3916/3071/6810/613/2294
BP	GO:0002534	cytokine production involved in inflammatory response	44	0.510384	1.8429	0.000628785	0.0217412	0.0189947	3035	tags=52%, list=23%, signal=40%	23765/63940/23646/240/140885/7124/11006/4615/8314/29108/215/148022/79004/55198/64170/2048/5465/4843/1432/5678/64127/113/6774
BP	GO:1900015	regulation of cytokine production involved in inflammatory response	44	0.510384	1.8429	0.000628785	0.0217412	0.0189947	3035	tags=52%, list=23%, signal=40%	23765/63940/23646/240/140885/7124/11006/4615/8314/29108/215/148022/79004/55198/64170/2048/5465/4843/1432/5678/64127/113/6774
BP	GO:0022904	respiratory electron transport chain	87	-0.379776	-1.72285	0.0006211	0.0217412	0.0189947	3545	tags=48%, list=27%, signal=36%	4709/27069/51142/6391/4718/4725/1337/4724/4694/10165/2110/4722/9167/4695/11232/6390/10891/51103/1350/4697/1340/4698/23369/54205/1716/1329/4701/4720/4700/29796/1345/2108/4726/1738/6392/7381/4702/1347/1348/7385/11315/4711
BP	GO:0030218	erythrocyte differentiation	107	0.391057	1.66637	0.000619339	0.0217412	0.0189947	2459	tags=36%, list=19%, signal=29%	2539/6688/51341/10370/10320/22985/10365/3635/3059/7538/8861/8314/2309/54681/677/28996/10019/405/3718/51621/7067/4067/604/1777/6777/211/51327/3071/2068/3624/7422/103/3784/212/3303/1054/1432/2113
CC	GO:0150034	distal axon	221	0.334377	1.57406	0.000628362	0.0217412	0.0189947	3142	tags=34%, list=24%, signal=26%	2185/2316/80228/393/11336/64780/25/9810/2288/51393/60/6714/1785/11344/10381/8943/1072/23265/81544/23307/9114/9513/10300/274/10280/9266/3831/1855/23162/1020/5798/10540/28964/6623/2002/790/9344/10409/79784/65018/794/1500/2596/4985/2902/59341/22853/22848/1627/5881/5864/6792/7786/50861/27124/1314/6572/23046/6624/7070/55811/11075/2691/10814/5024/10497/5025/2852/5020/23767/1813/5727/10439/134/6543
BP	GO:0010586	miRNA metabolic process	72	0.443127	1.76587	0.000636243	0.0219005	0.0191338	2695	tags=38%, list=20%, signal=30%	6688/7040/6597/7157/7124/7376/11006/8570/6721/5970/3265/23053/5914/9314/2309/4790/57473/4088/3725/5465/4775/10521/2113/7015/2353/1958/8061
BP	GO:0070316	regulation of G0 to G1 transition	30	0.565497	1.88448	0.000655429	0.0224602	0.0196228	1310	tags=40%, list=10%, signal=36%	8289/6604/6601/6597/6603/60/9275/9274/3135/6602/6598/6599
MF	GO:0140098	catalytic activity, acting on RNA	237	-0.281149	-1.48615	0.000671904	0.0229224	0.0200267	2806	tags=34%, list=21%, signal=27%	55106/81627/63899/64794/1654/23395/51110/8732/4848/1655/51163/283/55006/29102/79009/563/54505/29063/51651/8634/55278/51067/64848/54901/6894/5073/201626/10621/23404/10436/10352/9156/11062/79068/57038/64863/1787/1660/51106/2091/1662/60625/55703/5557/29883/55661/10146/112479/11102/5440/6038/11056/60487/54802/1653/96764/246243/6039/51567/10557/11325/5393/8846/9836/9337/27292/10775/9533/80746/54482/98…
BP	GO:0045655	regulation of monocyte differentiation	16	0.676617	1.91216	0.000675326	0.0229372	0.0200396	2894	tags=62%, list=22%, signal=49%	2242/920/22985/3635/3665/677/972/3204/56998/325
BP	GO:1901652	response to peptide	438	0.287269	1.44181	0.000694876	0.0234972	0.0205289	2957	tags=29%, list=22%, signal=24%	3727/10014/5580/7249/5905/6844/7351/22937/207/6778/5447/5829/4792/7297/6464/7431/10603/9181/9810/7157/5315/1445/23038/896/7124/682/4035/2771/6714/10365/3636/1537/208/5970/22861/51043/7832/9640/599/3297/9021/177/2309/4363/2931/677/6548/6776/3164/7076/2101/3663/1020/782/353/4790/5786/3718/5207/6599/23433/6429/5791/55198/51094/29988/64170/4067/6337/2048/3383/11132/6667/6777/3177/5967/6773/6794/5313/…
BP	GO:0002443	leukocyte mediated immunity	336	0.296695	1.45285	0.000703038	0.0236689	0.0206789	1906	tags=22%, list=14%, signal=20%	5777/5580/6813/2268/6844/2242/10312/6778/6688/7040/9466/3689/11151/127544/5880/10383/7124/11006/4615/6830/409/23207/10859/602/3635/7133/54440/3162/203068/3135/6850/975/3665/3566/7454/177/3106/80762/3965/3105/148022/9948/2207/8741/972/3718/3133/10538/1991/56848/5293/64170/4067/51279/1636/3596/3383/604/3134/5027/6777/1113/3916/566/7409/5817/6348/3071/9437/6810/2067/613/2529/710/2294
MF	GO:0016922	nuclear receptor binding	127	0.387248	1.69423	0.000717904	0.0240639	0.021024	2461	tags=34%, list=19%, signal=28%	3727/8289/81/6604/1616/6881/51341/6597/6256/5585/2288/9968/7376/3159/10474/6714/23558/11176/2033/79447/811/10025/3164/1051/11240/11331/10634/7205/4088/81857/6777/54828/4654/10766/1488/64210/9862/24148/64324/7041/79039/9612/10579
BP	GO:0030838	positive regulation of actin filament polymerization	39	0.524163	1.84373	0.000723985	0.0241622	0.0211099	2381	tags=41%, list=18%, signal=34%	2185/3055/5216/7408/10602/29108/274/51466/10435/6369/23580/3071/10458/11135/64223/2885
BP	GO:0051098	regulation of binding	309	0.31	1.51201	0.000739175	0.0245624	0.0214595	2627	tags=30%, list=20%, signal=24%	10155/8751/10014/5580/6604/207/6881/51341/7040/4792/10273/8536/1981/25/489/55182/4035/60/5986/6714/409/2962/1460/56257/602/4242/23129/3162/8189/2033/5914/10211/118/3297/177/5566/6612/5595/9314/10498/488/1855/5300/2280/5499/201501/1025/28996/26073/1020/8904/148022/3651/2801/2011/1869/4088/1026/81857/1636/8663/57326/4188/4654/2068/1488/1663/6497/65992/3300/64324/3725/5465/4318/5329/6590/26206/801/5…
CC	GO:0098800	inner mitochondrial membrane protein complex	91	-0.360635	-1.64797	0.00074432	0.0246267	0.0215157	3545	tags=47%, list=27%, signal=35%	4709/29928/92609/6391/54927/4718/10989/4725/1337/4724/4694/100287932/4722/9167/4695/6390/51103/1350/25874/10440/4697/51660/1340/4698/3313/1329/26515/4701/139322/4720/4700/29796/1345/55750/4726/79135/6392/7381/4702/1347/1348/7385/4711
BP	GO:0030490	maturation of SSU-rRNA	42	-0.477192	-1.89041	0.000756342	0.0248106	0.0216764	1722	tags=40%, list=13%, signal=35%	6217/8780/6223/6208/25983/11157/55272/11056/6227/404672/55781/55813/25926/10199/51077/55127/10885
BP	GO:0006446	regulation of translational initiation	70	-0.410422	-1.79321	0.000755794	0.0248106	0.0216764	963	tags=31%, list=7%, signal=29%	4690/253943/6451/6198/5436/1653/28969/4528/8872/23521/2332/8846/1965/1617/10959/9689/1983/4869/22916/1974/3646/8667
BP	GO:0002683	negative regulation of immune system process	360	0.29937	1.47303	0.000779901	0.0254746	0.0222564	3043	tags=33%, list=23%, signal=26%	5777/2268/207/79651/8525/1050/6778/6688/7040/9466/2896/5585/5987/968/3055/2874/8815/7124/7376/11006/6714/409/10859/11025/3635/3162/79890/3135/51043/6850/3566/1265/5914/56834/3106/1845/80762/25807/1051/11240/3965/3105/8764/58509/8993/5335/84243/972/864/3718/9572/3133/55365/79004/79671/4067/23170/8379/671/604/3958/3134/3659/60343/5045/6773/6348/3071/5133/613/25793/10766/710/2294/6469/79594/3624/103…
BP	GO:0033151	V(D)J recombination	16	-0.639226	-1.9117	0.000786284	0.0255742	0.0223435	2062	tags=50%, list=16%, signal=42%	5423/64421/64919/472/79840/7518/5896/3146
BP	GO:1902895	positive regulation of miRNA transcription	42	0.510222	1.83355	0.000800152	0.0259155	0.0226417	2695	tags=40%, list=20%, signal=32%	6688/7040/6597/7157/7124/7376/6721/5970/9314/2309/4088/3725/2113/7015/2353/1958/8061
CC	GO:0071564	npBAF complex	13	0.723154	1.92407	0.000828247	0.0260558	0.0227643	1310	tags=62%, list=10%, signal=56%	8289/6604/6601/6597/60/6602/6598/6599
CC	GO:0001725	stress fiber	59	0.467988	1.79658	0.000827574	0.0260558	0.0227643	2684	tags=39%, list=20%, signal=31%	64236/9260/81/7791/57175/5829/4627/7171/87/3611/1265/29109/10634/7205/23094/79784/4624/59/79778/4486/2275/8572/6624
CC	GO:0097517	contractile actin filament bundle	59	0.467988	1.79658	0.000827574	0.0260558	0.0227643	2684	tags=39%, list=20%, signal=31%	64236/9260/81/7791/57175/5829/4627/7171/87/3611/1265/29109/10634/7205/23094/79784/4624/59/79778/4486/2275/8572/6624
BP	GO:0031334	positive regulation of protein-containing complex assembly	152	0.367003	1.63805	0.000827049	0.0260558	0.0227643	2381	tags=34%, list=18%, signal=28%	2185/1639/578/2242/7040/4926/10273/4478/1981/7157/3055/5216/7408/7124/7376/4615/9780/6714/6850/10602/29108/274/51466/50807/10435/389/28964/4204/81857/3958/55626/84722/6369/23580/3071/65018/5526/5879/51673/54922/10458/7422/55755/7415/5341/11135/64223/581/1003/3303/2885
BP	GO:0045732	positive regulation of protein catabolic process	161	0.352005	1.58283	0.000815367	0.0260558	0.0227643	2566	tags=35%, list=19%, signal=28%	7917/207/101/1050/91304/10273/4478/11337/9810/127544/7124/79016/4035/10444/51343/112398/7133/975/51160/5886/6449/2931/80762/1642/6811/25807/1855/9817/20/4947/27352/23163/8078/8742/10425/29978/23640/26471/79888/5045/7879/1453/7415/65992/1263/3300/5704/57817/3303/8312/11267/10297/51079/8975/4092/55823
BP	GO:0051924	regulation of calcium ion transport	215	0.33559	1.57279	0.000827419	0.0260558	0.0227643	3105	tags=30%, list=23%, signal=23%	2185/5777/2539/578/1729/706/11151/25/920/5987/11027/51393/9454/2771/409/5371/10859/7531/80024/5566/6548/274/2280/3603/5335/1020/782/818/3718/54923/3064/2946/56848/4067/1636/3596/3958/5023/5027/6348/5031/4985/2859/10288/2902/1230/4987/816/801/581/7416/6786/51475/28954/7070/784/56344/5024/5025/2852/5319/1813/57158/387
BP	GO:0090130	tissue migration	275	0.309039	1.48743	0.000822325	0.0260558	0.0227643	2943	tags=31%, list=22%, signal=25%	2185/10014/25865/57175/207/5829/7040/2896/4627/11151/5585/25/1201/5216/2821/7124/51157/6714/1460/23129/3162/9647/3728/64218/9314/811/388/7016/6776/3164/51466/14/5335/9922/3315/493/8742/23328/4204/5293/51094/6667/10013/6237/3868/54828/57142/5879/4851/70/2294/11156/51564/7422/1969/6915/2196/84830/59/949/1512/3725/4318/72/5646/10755/1003/23616/2113/25959/6286/23598/335/4215/3640/8817/285/1907/2876/2…
CC	GO:0005767	secondary lysosome	16	0.669813	1.89293	0.000853414	0.0266437	0.0232779	827	tags=50%, list=6%, signal=47%	8878/2548/101/1201/653361/9842/4689/2512
BP	GO:0045185	maintenance of protein location	78	0.436009	1.75794	0.000860819	0.0266437	0.0232779	1829	tags=31%, list=14%, signal=27%	2316/5905/207/28952/706/25792/10956/4792/4793/920/5371/7529/11344/2934/10945/9817/3098/1020/4794/11014/8733/65018/4188/25777
BP	GO:0140053	mitochondrial gene expression	107	-0.350651	-1.63554	0.000857148	0.0266437	0.0232779	2919	tags=44%, list=22%, signal=35%	51023/63875/51318/63899/65003/23395/28957/64975/55006/10884/60493/23107/51650/79736/55278/51067/10128/10240/9801/10352/57038/64863/51106/28958/65080/60488/79072/25821/55052/79675/51021/4701/54802/29074/11222/29093/55037/4528/22868/63931/8846/7978/5562/78988/56945/7818/28977
MF	GO:0051020	GTPase binding	237	0.325687	1.55378	0.000858763	0.0266437	0.0232779	2365	tags=28%, list=18%, signal=23%	2316/2783/7249/5905/64780/1729/5585/2664/22870/79803/9181/253980/752/537/5216/10938/54662/8216/392/79890/9605/4296/23647/7454/4650/274/1855/57819/50855/85377/2782/1613/259173/8408/1211/79711/9578/27352/23163/10397/10435/28964/56848/23637/9610/23258/5875/1857/23299/55626/7879/23580/10113/23062/54922/78992/3706/58528/8936/89781/80223/5830/6792/30000/26999/79778
BP	GO:0002764	immune response-regulating signaling pathway	347	0.300178	1.47228	0.000877188	0.0270413	0.0236253	2760	tags=29%, list=21%, signal=23%	5777/25865/5580/2268/7917/10318/8525/4792/25/10603/3055/11027/3661/1445/2874/51296/9261/7124/81622/23149/11006/4615/728/6714/409/10859/7867/3635/5970/22861/3135/6850/975/3665/3265/2033/10211/1845/29108/3654/3105/11331/58509/5335/5338/148022/79155/55666/4814/973/2207/54923/9572/3551/55198/5293/79671/8517/4067/2867/3958/3659/7409/51324/974/2219/3071/6794/10616/7410/23098/57142/23151/10288/1493/7305…
BP	GO:0002274	myeloid leukocyte activation	195	0.341609	1.58427	0.000882713	0.0271028	0.023679	2200	tags=29%, list=17%, signal=24%	3727/4055/5777/5580/6813/2268/6844/2242/1050/6688/22904/2896/3689/399687/11027/5880/7124/11006/4615/728/5971/3162/6850/3566/177/29108/64784/8291/3965/6556/148022/79155/3579/2207/972/10397/9572/10538/56848/5293/4067/3596/671/1113/64109/566/6348/6810/613/2294/7305/8877/57817/7462/3725/11314
BP	GO:0010035	response to inorganic substance	470	0.28135	1.41865	0.000887749	0.0271488	0.0237192	3170	tags=30%, list=24%, signal=24%	3727/2185/5339/311/5580/2539/578/57192/7351/207/6494/1616/1050/10312/6778/706/2664/25/2821/140885/23135/3726/23400/51157/682/653361/2937/6714/1785/10105/10365/10494/9973/3162/5970/7226/553115/118/3297/23385/8314/5595/2309/2931/811/388/4155/4520/10280/5499/8904/2354/3707/10235/7390/5598/3651/493/10397/955/3931/572/3613/6609/6261/5536/3756/5027/10013/55139/1396/4353/65018/5313/2067/26/9361/10587/68…
MF	GO:0019783	ubiquitin-like protein peptidase activity	68	-0.407188	-1.7874	0.000897881	0.0272977	0.0238493	2557	tags=44%, list=19%, signal=36%	23032/389856/115201/8665/8287/55031/10987/9097/64854/57337/9736/92552/8239/10600/7398/26054/10617/55325/7347/10010/84669/9100/10208/51377/219333/51138/79184/4287/29761/8667
BP	GO:0009132	nucleoside diphosphate metabolic process	109	0.383287	1.63875	0.00089973	0.0272977	0.0238493	1801	tags=26%, list=14%, signal=22%	7167/11182/51341/3101/5315/2821/5211/4833/4967/226/2033/79873/3607/2584/3098/2987/405/5207/955/572/28964/26471/790/5027/4832/4354/5313/5214
BP	GO:0006397	mRNA processing	359	-0.252069	-1.40649	0.000904175	0.0273246	0.0238728	2272	tags=29%, list=17%, signal=25%	55149/56903/79810/6633/202559/51319/23064/60493/10492/10929/4691/6627/4236/3550/51747/10891/79005/57187/201626/27257/6629/55660/55796/64783/51340/1660/55280/51362/8559/5411/151987/60625/3185/55234/10659/23283/10236/11157/9295/1479/9733/55596/5978/8899/10915/4116/51691/58155/11066/10150/5935/55197/83448/51574/27258/3189/11168/1653/1207/96764/64506/11319/9588/4154/1477/9584/91746/6634/25949/10772/3…
BP	GO:0045023	G0 to G1 transition	32	0.546715	1.84703	0.000910685	0.0274134	0.0239504	1310	tags=41%, list=10%, signal=37%	8289/6604/6601/6597/6603/60/9275/9274/3135/6602/1018/6598/6599
BP	GO:0021915	neural tube development	129	0.374936	1.64396	0.000919413	0.027568	0.0240854	2571	tags=33%, list=19%, signal=26%	6692/7249/10370/7040/23654/25/5216/55182/8985/7408/9968/23770/5914/3705/5566/6768/677/6046/1855/9742/8543/4524/10522/8321/54910/1857/23648/55626/2535/10653/10524/4082/2637/4851/6469/1969/6497/23513/140467/7289/80199/5916
BP	GO:2000147	positive regulation of cell motility	460	0.280037	1.40918	0.000938501	0.0280309	0.0244898	2204	tags=21%, list=17%, signal=18%	23625/2185/5605/6282/25865/81/2268/63940/207/101/6688/1729/3570/7040/4150/2896/3678/11151/25/9181/5216/5880/2821/7124/51157/2771/728/6714/3162/208/3265/4267/9647/64218/177/5595/811/388/29108/23060/6776/14/3965/1613/8764/5335/9922/3315/7205/3579/972/23328/389/3687/10507/79872/54910/5293/1436/7423/4088/4067/2048/3383/3958/6667/10013/6237/6369/6348/3071/6810/2155/5031/54828/25777/57142/2529/5879/485…
BP	GO:0001731	formation of translation preinitiation complex	10	-0.763072	-1.97499	0.000944948	0.028114	0.0245625	2752	tags=90%, list=21%, signal=71%	1939/54505/8562/8894/1975/1968/28985/23521/1983
BP	GO:0006096	glycolytic process	74	0.442134	1.77078	0.000955877	0.0282204	0.0246554	2402	tags=32%, list=18%, signal=27%	7167/11182/51341/3101/5315/2821/5211/4967/226/2033/3607/2584/3098/405/5207/28964/26471/5027/5313/5214/5465/3643/64223/5223
BP	GO:0006757	ATP generation from ADP	74	0.442134	1.77078	0.000955877	0.0282204	0.0246554	2402	tags=32%, list=18%, signal=27%	7167/11182/51341/3101/5315/2821/5211/4967/226/2033/3607/2584/3098/405/5207/28964/26471/5027/5313/5214/5465/3643/64223/5223
BP	GO:0006403	RNA localization	166	-0.304808	-1.54232	0.000983369	0.0289209	0.0252674	1509	tags=27%, list=11%, signal=24%	5901/55164/4927/1660/2091/26097/23279/5903/7514/79023/26019/51092/10643/4116/54680/6741/545/29074/908/472/55746/91746/10575/57122/27067/2332/57097/3181/6426/8480/9908/6432/22948/53371/10576/9984/9326/9804/10694/4869/22916/55916/3178/6428
CC	GO:0001726	ruffle	148	0.356673	1.58293	0.000996525	0.0291959	0.0255077	2403	tags=29%, list=18%, signal=24%	23550/10347/9260/6282/6277/2268/51177/1729/4627/3678/25/9181/7094/23396/87/6714/10163/1785/1072/208/822/23647/4650/50855/5335/10235/55198/54869/9368/5879/8394/10458/1969/5141/59341/5753/81848/4771/6792/5341/64419/27124/54997
MF	GO:0005080	protein kinase C binding	44	0.499458	1.80344	0.00100953	0.0293529	0.0256449	2291	tags=36%, list=17%, signal=30%	2316/10014/25865/8878/5589/5585/25/6714/11344/50855/3315/4082/9463/51564/59341/5341
BP	GO:0016032	viral process	358	0.295286	1.45175	0.00100803	0.0293529	0.0256449	2273	tags=26%, list=17%, signal=22%	10155/8662/5034/3609/6510/10318/4245/1487/79643/5119/3678/6597/920/5987/7157/5093/7392/79581/8815/79720/7124/7342/27183/682/11282/11253/3695/1072/975/3665/5725/2033/7538/6404/51160/81876/5886/598/7841/27090/2934/2931/1642/5094/7706/9150/50855/3965/8764/3054/1025/6598/91782/22880/1508/55741/6780/30835/972/6483/6614/10572/7293/9189/4061/1436/6895/6609/28972/3383/6667/5045/7879/3916/2219/5817/6348/4…
CC	GO:0009898	cytoplasmic side of plasma membrane	142	0.369638	1.63344	0.00101508	0.0294028	0.0256884	1521	tags=25%, list=11%, signal=22%	2185/5605/6277/2539/2783/2268/2242/207/4627/2787/5127/3055/2769/161/2778/11006/2771/6714/1175/8514/6850/79058/3728/9854/9267/2782/10188/1173/2767/3092/23344/3551/22821/5064/4067
BP	GO:0001667	ameboidal-type cell migration	374	0.294017	1.45025	0.00103056	0.0297389	0.0259821	2984	tags=28%, list=23%, signal=22%	2185/5339/393/10014/25865/57175/207/5829/7040/2896/4627/11151/5585/25/1201/5216/2821/7124/51157/6714/10163/5371/1460/23129/3611/3695/3162/9647/3728/64218/9314/811/388/7016/6776/3164/8879/7076/51466/1947/14/5335/9922/3315/493/8742/23328/10507/54910/55198/4204/5293/309/51094/9368/6667/10013/6237/3868/54828/57142/2637/5879/4851/6469/8394/11156/51564/7422/1969/6915/2196/84830/59/949/1512/3725/4318/10…
BP	GO:0030595	leukocyte chemotaxis	208	0.330013	1.54355	0.00104347	0.0299986	0.026209	2181	tags=24%, list=16%, signal=20%	2185/5339/23765/63940/101/1441/6688/3570/3689/11151/5880/240/51157/23396/682/728/79890/7226/6850/80024/6280/5595/811/3603/11240/3965/3579/4814/2207/972/5293/1436/7423/4067/2867/3958/6369/1113/566/7409/6348/3071/4354/2155/5879/7422/1230/59341/79647/27202
BP	GO:0033209	tumor necrosis factor-mediated signaling pathway	85	0.411341	1.68472	0.00108062	0.0309508	0.0270409	3258	tags=48%, list=25%, signal=37%	2185/81/28511/4792/7157/2874/7124/2950/7133/3611/5970/6850/2309/29108/8764/8904/7293/3551/10670/7132/56928/8737/8877/7187/3303/8792/970/51588/9825/335/8718/8996/3875/2621/5516/81858/204851/7185/10401/6868/8717
BP	GO:0061614	miRNA transcription	57	0.471351	1.80149	0.00109758	0.0309744	0.0270615	2695	tags=39%, list=20%, signal=31%	6688/7040/6597/7157/7124/7376/11006/6721/5970/5914/9314/2309/57473/4088/3725/5465/4775/2113/7015/2353/1958/8061
BP	GO:0045834	positive regulation of lipid metabolic process	128	0.369841	1.61896	0.00109675	0.0309744	0.0270615	2330	tags=25%, list=18%, signal=21%	2185/5580/2268/22937/207/8525/23399/5447/7040/7124/7376/6714/58526/57104/208/975/215/972/9572/56848/4067/55626/10524/7410/54361/949/5465/2693/6343/336/116986/64223
BP	GO:0019318	hexose metabolic process	189	0.347531	1.60316	0.00109055	0.0309744	0.0270615	2540	tags=31%, list=19%, signal=25%	2539/4125/2548/207/7167/3101/10295/7157/5315/2821/5211/23038/7124/6714/226/3636/208/6576/2033/2931/1642/3607/7355/2584/3098/5261/92579/3651/5207/572/2592/51094/5373/4123/60343/1196/6794/5214/2529/1609/51181/5950/2171/3784/6097/23509/9563/5465/5372/5210/5106/3643/231/2526/6652/1432/140710/51547
BP	GO:0032102	negative regulation of response to external stimulus	330	0.301207	1.47351	0.00109443	0.0309744	0.0270615	3251	tags=32%, list=25%, signal=25%	5580/2268/57175/79651/2896/3055/11027/2874/240/8815/140885/29956/7124/7376/2950/6714/409/57680/10859/7133/79890/3135/6850/7538/64218/9021/3106/59307/9314/1845/80762/5094/1855/11240/3965/3105/58509/8993/5335/10019/4790/55666/84243/5598/9572/3133/1991/10507/54910/28964/4088/79671/6895/4067/23170/3596/3134/60343/5045/6773/7132/613/710/4851/2294/79594/103/947/84830/54361/57817/27202/5465/5329/2693/10…
BP	GO:0019216	regulation of lipid metabolic process	274	0.308588	1.48419	0.00110507	0.0310716	0.0271464	2330	tags=23%, list=18%, signal=19%	2185/10347/5580/2268/22937/207/8525/23399/5447/706/7040/10273/2874/23038/29956/7124/7376/6714/58526/57104/208/975/37/8897/64784/79143/5660/215/20/26580/11331/4790/972/9572/7536/55198/56848/79888/51094/80207/7067/4067/60343/55626/6777/29095/10524/7410/1609/54361/2171/8877/6097/949/9563/5465/1019/9110/2693/6343/336/116986/64223
CC	GO:0071556	integral component of lumenal side of endoplasmic reticulum membrane	21	0.630721	1.90765	0.00112825	0.0314926	0.0275143	1931	tags=48%, list=15%, signal=41%	6892/3107/3135/3106/811/3105/972/3133/3134/56928
CC	GO:0098553	lumenal side of endoplasmic reticulum membrane	21	0.630721	1.90765	0.00112825	0.0314926	0.0275143	1931	tags=48%, list=15%, signal=41%	6892/3107/3135/3106/811/3105/972/3133/3134/56928
CC	GO:0098562	cytoplasmic side of membrane	159	0.345902	1.55908	0.00113334	0.03152	0.0275381	1521	tags=23%, list=11%, signal=21%	2185/5605/6277/2539/2783/2268/2242/207/4627/2787/5127/3055/2769/161/2778/11006/2771/2647/6714/1175/8514/6850/79058/3728/9854/9267/2280/2782/10188/1173/2767/3092/23344/3551/22821/5064/4067
BP	GO:0002687	positive regulation of leukocyte migration	130	0.371571	1.63031	0.00114274	0.0316666	0.0276663	2178	tags=26%, list=16%, signal=22%	2185/63940/101/6688/3570/11151/25/5880/7124/51157/728/4267/177/5595/811/29108/3965/8764/3579/972/1436/7423/3383/3958/6369/6348/3071/2155/2529/5879/7422/1230/59341/79647
CC	GO:0005839	proteasome core complex	17	-0.649525	-1.9765	0.00115931	0.0319606	0.0279232	1711	tags=59%, list=13%, signal=51%	5695/5685/5686/5684/5689/5691/5683/5688/5682/5692
BP	GO:0110053	regulation of actin filament organization	210	0.330257	1.54241	0.00116584	0.0319606	0.0279232	2936	tags=34%, list=22%, signal=27%	2185/2316/5580/57175/5829/11151/2314/25/5987/3055/5216/7408/832/6709/10163/11344/116985/3059/23406/822/23647/9647/7454/118/10602/2934/10093/29108/6548/7016/274/51466/29109/9948/54961/10435/389/10174/54434/4088/6369/23580/3071/5879/9463/10458/8936/54361/1627/2041/4771/5341/11135/26999/64223/50853/2885/23616/10095/335/5058/5062/23370/10094/375/6281/9113/673/2909/256949/55160
CC	GO:0005743	mitochondrial inner membrane	307	-0.254585	-1.39597	0.0011621	0.0319606	0.0279232	2919	tags=32%, list=22%, signal=25%	51023/63875/1337/4724/9016/51318/4694/10845/55486/10165/83447/2235/80219/65003/28957/100287932/2110/4722/64975/29957/8034/9167/10884/4695/60558/23107/79714/51650/10131/6390/1585/51103/1350/10240/1160/25874/9801/10229/729515/5321/10440/4697/5018/3032/51660/1340/57380/259/28958/4698/3052/3313/3329/65080/60488/55052/2628/51021/54205/25880/1329/26515/4701/1371/29074/139322/11222/29093/55037/4720/4700…
BP	GO:0043299	leukocyte degranulation	70	0.436058	1.73081	0.00119975	0.032657	0.0285315	2200	tags=39%, list=17%, signal=32%	6813/2268/6844/2242/6688/3689/11151/3055/5880/3162/6850/3566/3965/56848/5293/4067/3596/3134/1113/3916/6348/3071/6810/613/2294/7462/11314
BP	GO:0006816	calcium ion transport	344	0.293757	1.44004	0.00119728	0.032657	0.0285315	3105	tags=29%, list=23%, signal=23%	2185/2316/80228/5777/2539/578/57192/1729/706/11151/25/920/489/5987/11027/51393/9454/2771/409/5371/10859/7226/7531/80024/5566/6548/274/488/2280/26133/3603/10523/5335/1020/29927/782/818/493/3718/54923/93129/3064/2906/2946/56848/309/2812/22821/4067/6261/1636/3596/3958/5023/5027/10267/10316/6348/3954/5031/4985/2859/10288/2902/1230/59341/4987/816/2829/23413/801/8913/581/7416/6786/773/53373/51475/28954…
CC	GO:0043202	lysosomal lumen	86	0.402209	1.65055	0.00120632	0.0327198	0.0285864	2099	tags=28%, list=16%, signal=24%	23646/4125/1509/2548/1200/23400/5476/3425/6448/3423/138050/5660/4669/1508/4758/972/9672/6609/8635/53/3073/8722/10855/2588
BP	GO:0030335	positive regulation of cell migration	447	0.281738	1.41604	0.00122628	0.033144	0.0289571	2204	tags=21%, list=17%, signal=18%	23625/2185/6282/25865/81/2268/63940/207/101/6688/1729/3570/7040/4150/2896/3678/11151/25/9181/5216/5880/2821/7124/51157/2771/728/6714/3162/208/3265/4267/9647/64218/177/5595/811/388/29108/23060/6776/14/3965/1613/8764/5335/9922/3315/7205/3579/972/23328/389/3687/10507/79872/54910/5293/1436/7423/4088/4067/2048/3383/3958/6667/10013/6237/6369/6348/3071/6810/2155/5031/54828/25777/57142/2529/5879/4851/229…
CC	GO:0140288	GBAF complex	12	0.735103	1.88912	0.00124411	0.0333915	0.0291733	2141	tags=58%, list=16%, signal=49%	6597/60/9275/9274/6602/6599/65980
BP	GO:0051283	negative regulation of sequestering of calcium ion	105	0.386754	1.64124	0.00124413	0.0333915	0.0291733	2694	tags=31%, list=20%, signal=25%	2185/2316/5777/57192/1729/11151/25/7226/80024/5566/2280/10523/5335/54923/3064/2946/309/2812/22821/4067/6261/3596/5027/6348/3954/5031/2829/801/581/53373/2815/8996/7070
MF	GO:0016655	oxidoreductase activity, acting on NAD(P)H, quinone or similar compound as acceptor	43	-0.470492	-1.86844	0.00127401	0.0340742	0.0297697	3545	tags=53%, list=27%, signal=39%	4709/1728/4718/1429/4725/4724/4694/874/4722/1645/4695/8644/873/4697/4698/9946/4701/4720/4700/84869/4726/4702/4711
BP	GO:0022408	negative regulation of cell-cell adhesion	159	0.343359	1.54762	0.00128529	0.0342566	0.0299291	2771	tags=33%, list=21%, signal=26%	5777/5580/207/53827/6688/7040/25/11006/10859/3135/51043/3566/9647/9314/1845/80762/4155/1051/4855/3965/8764/10019/5598/972/864/3718/8379/604/3958/3659/3071/10653/4851/6469/7422/10288/1493/84830/59341/5465/11314/4771/64600/445/23513/4092/3077/335/3557/3142/259307/8651
BP	GO:0045055	regulated exocytosis	195	0.337021	1.56299	0.0013092	0.0347732	0.0303804	2329	tags=28%, list=18%, signal=24%	6813/2268/6844/64780/2242/8775/6688/3689/4627/11151/3055/5880/23396/51150/2771/3162/9144/6850/3566/8676/488/1855/55114/3965/1020/9145/28964/56848/5293/4067/3596/3134/5023/5027/1113/3916/6348/3071/6810/613/8447/6861/4851/2294/1488/9230/127833/80223/7462/11314/5864/5341/8913/23513/10755
BP	GO:0042119	neutrophil activation	36	0.527069	1.81798	0.00132172	0.0349846	0.0305651	2200	tags=39%, list=17%, signal=33%	5580/6813/6688/2896/3689/11027/7124/4615/6850/3579/2207/613/7305/11314
BP	GO:0002283	neutrophil activation involved in immune response	18	0.642262	1.88742	0.0013331	0.0350887	0.030656	2062	tags=50%, list=16%, signal=42%	6813/6688/3689/11027/4615/6850/2207/613/7305
BP	GO:0040017	positive regulation of locomotion	473	0.280847	1.41641	0.00133479	0.0350887	0.030656	2204	tags=21%, list=17%, signal=18%	23625/2185/5605/6282/25865/81/2268/63940/207/101/6688/1729/3570/7040/4150/2896/3678/11151/25/9181/5216/5880/2821/7124/51157/2771/728/6714/3162/208/3265/4267/9647/64218/177/5595/811/388/29108/23060/6776/3603/14/3965/1613/8764/5335/9922/3315/7205/3579/972/23328/389/3687/10507/79872/54910/5293/1436/7423/4088/4067/2048/3383/3958/6667/10013/6237/6369/566/6348/3071/6810/2155/5031/54828/25777/57142/2529…
BP	GO:0000054	ribosomal subunit export from nucleus	13	-0.701763	-1.99766	0.00135555	0.0353918	0.0309209	1509	tags=54%, list=11%, signal=48%	5901/4927/7514/55781/6059/51068/4869
BP	GO:0033750	ribosome localization	13	-0.701763	-1.99766	0.00135555	0.0353918	0.0309209	1509	tags=54%, list=11%, signal=48%	5901/4927/7514/55781/6059/51068/4869
BP	GO:0046031	ADP metabolic process	81	0.42014	1.71221	0.00139513	0.0361191	0.0315563	2402	tags=31%, list=18%, signal=25%	7167/11182/51341/3101/5315/2821/5211/4967/226/2033/3607/2584/3098/405/5207/572/28964/26471/5027/5313/5214/5465/3643/64223/5223
BP	GO:0051208	sequestering of calcium ion	110	0.376784	1.6079	0.00139195	0.0361191	0.0315563	1804	tags=25%, list=14%, signal=21%	2185/2316/5777/57192/1729/11151/25/7226/80024/5566/811/2280/10523/5335/54923/3064/2946/309/2812/22821/4067/6261/3596/5027/6348/3954/5031
BP	GO:0006417	regulation of translation	297	-0.257496	-1.39704	0.00139752	0.0361191	0.0315563	3136	tags=37%, list=24%, signal=29%	3192/23178/79727/22794/4076/57472/7175/3184/6203/55226/9728/7555/399664/63899/65109/1654/9939/4848/23191/53918/283/10140/10767/9669/65981/54542/60558/10492/54505/4691/23107/6093/5997/29063/23173/10131/10128/55140/55024/5073/201626/27257/23404/10600/1975/9475/79068/1660/8892/1968/28958/6208/1977/25983/23369/29883/79072/2107/6125/8507/4690/10643/406991/253943/4116/6451/6197/6198/5436/5935/113251/11…
BP	GO:0045637	regulation of myeloid cell differentiation	164	0.35299	1.59319	0.00141047	0.0362351	0.0316577	2571	tags=31%, list=19%, signal=25%	2185/2242/1441/6688/7040/4792/920/7124/11006/22985/10859/11025/3635/3059/3665/7538/5914/8861/3297/56834/7030/2309/54681/80762/677/54623/1051/2101/3707/405/972/51621/4067/6777/6348/3071/10766/3624/9398/8737/1230/7305/3204/6988/3303/56998/54997/1432/2113/2353/5916
CC	GO:0005911	cell-cell junction	393	0.288298	1.42974	0.00141145	0.0362351	0.0316577	2774	tags=27%, list=21%, signal=22%	64236/2316/7317/2319/5777/8751/5605/9260/6282/5580/7791/207/5829/4627/3678/11151/4478/9181/7094/1445/7408/23396/60/87/10163/8189/1265/3728/7454/10211/118/9267/6548/9266/29109/55114/50855/5499/10188/26073/11187/9578/79629/9948/27352/10397/2700/23094/6904/4067/24146/5027/5348/7409/9618/1308/23580/5817/4354/794/57493/6010/26/1500/23769/4851/54922/8502/10458/7422/11007/1969/2196/1364/29855/59341/1627…
BP	GO:0009060	aerobic respiration	134	-0.321357	-1.57686	0.00144725	0.0368203	0.032169	2226	tags=32%, list=17%, signal=27%	9167/4695/5162/1737/538/158/79736/6390/51103/1350/3417/201626/3091/4436/9650/4697/5018/1340/4698/8801/54205/1716/1329/4701/80025/4720/3419/4700/29796/1345/4726/1738/2271/6392/7381/3416/4702/1347/1348/7385/4190/11315/4711
BP	GO:0045862	positive regulation of proteolysis	293	0.304642	1.48025	0.00144319	0.0368203	0.032169	2136	tags=26%, list=16%, signal=22%	2185/578/1509/7917/10318/207/28952/101/1050/2896/91304/4627/10273/11337/9810/489/127544/10197/7124/11047/79016/6714/5371/10444/51343/7133/22861/6850/9647/6280/5886/3297/23385/6449/177/2934/2931/29108/4155/1855/57154/27141/9817/3965/54998/51107/8078/3092/572/10425/29978/23640/4088/26471/51024/64170/4067/57333/5023/5045/1453/65018/1944/79594/27429/6300/23151/2902/1364/7415/65992/1263/3300/5704/1512
BP	GO:0070661	leukocyte proliferation	299	0.303805	1.47706	0.00144864	0.0368203	0.032169	1647	tags=20%, list=12%, signal=18%	5777/5580/10312/6778/9466/7297/11151/5585/4478/25/7157/5880/896/3726/2950/11006/4615/10859/55716/3635/7133/54440/2000/3135/51043/6850/975/1265/23385/598/177/8314/5595/80762/29108/1051/1947/3965/3105/8764/6556/148022/973/30835/972/3718/3133/7293/1436/1026/4067/1636/2048/8379/3596/604/3958/3659/5027/6777/63925
BP	GO:0002532	production of molecular mediator involved in inflammatory response	66	0.432492	1.69268	0.00146901	0.0372148	0.0325136	1677	tags=35%, list=13%, signal=31%	23765/63940/23646/2896/240/140885/7124/653361/11006/4615/6850/3566/8314/29108/215/148022/79004/55198/64170/4067/2048/5023/57326
MF	GO:0034987	immunoglobulin receptor binding	13	0.703028	1.87053	0.00150067	0.0373307	0.0326149	105	tags=23%, list=1%, signal=23%	2316/2268/2242
BP	GO:0046339	diacylglycerol metabolic process	20	0.617363	1.85761	0.00151249	0.0373307	0.0326149	2298	tags=50%, list=17%, signal=41%	8525/57104/1606/8694/8527/1608/23659/1609/747/336
CC	GO:0070821	tertiary granule membrane	61	0.450963	1.74209	0.00150921	0.0373307	0.0326149	1369	tags=26%, list=10%, signal=24%	23218/11322/2548/101/3689/140885/527/9725/7226/8514/23250/3903/138050/6556/2207/3687
MF	GO:0051219	phosphoprotein binding	82	0.419596	1.71523	0.00149666	0.0373307	0.0326149	3362	tags=44%, list=25%, signal=33%	5777/2268/63935/5589/8535/6464/25/3055/2288/5216/6714/7529/6452/7531/6850/9021/5595/5300/23624/4067/7409/10670/7410/1399/2885/53358/4221/2810/55011/1398/23168/3482/3932/5594/9967/26119
BP	GO:0032543	mitochondrial translation	84	-0.354327	-1.59078	0.00148709	0.0373307	0.0326149	2919	tags=44%, list=22%, signal=35%	51023/63875/51318/63899/65003/23395/28957/64975/10884/23107/51650/55278/51067/10128/10240/9801/10352/57038/28958/65080/60488/79072/55052/51021/4701/29074/11222/29093/55037/4528/22868/63931/8846/78988/56945/7818/28977
CC	GO:0030176	integral component of endoplasmic reticulum membrane	117	0.369556	1.59031	0.0014843	0.0373307	0.0326149	2483	tags=34%, list=19%, signal=28%	57130/1201/6892/23770/3107/6721/3135/6238/3106/811/8879/54344/550/64834/113419/26580/3105/51614/29927/1388/57171/972/3133/23344/28972/8733/3134/10113/57142/11001/9986/56928/6252/51604/9524/54020/23141/8818/6786/6253
BP	GO:0051056	regulation of small GTPase mediated signal transduction	236	0.318738	1.5182	0.00149957	0.0373307	0.0326149	1974	tags=23%, list=15%, signal=20%	23550/393/8878/7249/396/6494/27128/29/51291/50619/11337/25/9181/253980/9826/9138/8216/6714/1785/23636/9909/392/116985/9754/10211/4650/22898/408/9267/9266/55114/9922/3707/27352/8567/28964/54869/23094/7204/5863/22821/2048/604/7409/26037/5894/57493/7410/613/55738/5879/4851/54922/2859
BP	GO:0009991	response to extracellular stimulus	422	0.285823	1.42641	0.00150803	0.0373307	0.0326149	3361	tags=32%, list=25%, signal=25%	5339/7942/2539/7351/2242/207/6494/5447/706/6256/10226/11337/11152/55630/1981/7157/968/23334/7392/7124/7376/2771/6714/26100/3162/6721/7538/5914/3297/5595/8897/2309/10919/1032/191/26001/3607/53615/7706/27141/10634/8408/9681/3651/4524/25828/5207/1312/55198/79792/1026/4067/1636/435/6667/5027/55626/10670/4353/5313/2155/10524/2067/26/54828/4654/353500/2689/9463/6915/58528/8131/54361/59341/3141/57817/79…
MF	GO:0070742	C2H2 zinc finger domain binding	13	0.701135	1.86549	0.00156627	0.0380465	0.0332402	1964	tags=46%, list=15%, signal=39%	11338/23524/10919/80764/79364/7789
BP	GO:0045746	negative regulation of Notch signaling pathway	29	0.551844	1.81835	0.00155115	0.0380465	0.0332402	3730	tags=59%, list=28%, signal=42%	207/51341/4792/408/1018/9148/604/9139/65989/11060/55662/79094/23462/3955/84934/55343/51441
CC	GO:0070469	respirasome	69	-0.393975	-1.72659	0.00155911	0.0380465	0.0332402	3147	tags=43%, list=24%, signal=33%	4718/4725/1337/4724/4694/4722/9167/4695/6390/51103/1350/4697/1340/4698/54205/1329/4701/4720/4700/29796/1345/25994/4726/6392/7381/4702/1347/1348/7385/4711
BP	GO:0005996	monosaccharide metabolic process	201	0.332242	1.54387	0.00155391	0.0380465	0.0332402	2540	tags=29%, list=19%, signal=24%	2539/4125/2548/207/7167/3101/10295/7157/5315/2821/5211/23038/7124/6714/226/3636/208/6576/2033/5226/2931/1642/3607/7355/2584/3098/5261/92579/3651/5207/572/2592/51094/5373/4123/60343/1196/6794/5214/2529/1609/51181/5950/2171/3784/6097/23509/9563/5465/5372/5210/5106/3643/231/2526/6652/1432/140710/51547
BP	GO:0031667	response to nutrient levels	398	0.288876	1.435	0.00156327	0.0380465	0.0332402	3217	tags=31%, list=24%, signal=24%	5339/7942/2539/7351/2242/207/5447/706/6256/10226/11337/11152/55630/1981/7157/968/23334/7392/7124/7376/2771/6714/26100/3162/6721/7538/5914/3297/5595/8897/2309/10919/1032/191/26001/3607/53615/7706/27141/10634/8408/9681/3651/4524/25828/5207/1312/55198/1026/1636/435/6667/55626/10670/4353/5313/2155/10524/2067/26/54828/4654/353500/2689/9463/6915/58528/8131/54361/59341/3141/57817/79726/23274/5465/5106/5…
BP	GO:0007229	integrin-mediated signaling pathway	96	0.393506	1.64164	0.00158524	0.0383858	0.0335366	1674	tags=22%, list=13%, signal=19%	2185/2316/8751/2268/7791/3683/3689/4627/3678/25/3055/7094/6714/3611/3695/6850/7076/5786/3687/967/7409
BP	GO:0030833	regulation of actin filament polymerization	104	0.386895	1.63217	0.00161471	0.0389765	0.0340527	2477	tags=33%, list=19%, signal=27%	2185/5580/11151/2314/3055/5216/7408/832/6709/11344/3059/23406/822/118/10602/2934/10093/29108/274/51466/54961/10435/54434/6369/23580/3071/10458/1627/11135/26999/64223/50853/2885/10095
BP	GO:0050921	positive regulation of chemotaxis	128	0.364125	1.59394	0.00162355	0.0390476	0.0341149	2178	tags=25%, list=16%, signal=21%	2185/25865/63940/6688/3570/7040/5880/51157/728/9647/177/5595/811/3603/3965/3315/3579/972/1436/7423/4088/566/6348/3071/6810/2155/5879/9048/7422/1230/59341/79647
BP	GO:0001819	positive regulation of cytokine production	395	0.282763	1.40395	0.00162783	0.0390476	0.0341149	2101	tags=23%, list=16%, signal=20%	25865/23765/2268/63940/101/3570/7040/9466/7297/25/9181/920/5987/11027/3661/9261/7124/51157/4615/728/6714/10859/602/54440/3162/5970/22861/3135/51043/6850/10554/975/3665/3265/3566/10555/5914/10211/177/29108/4155/1051/3603/3654/3663/3965/3105/8764/3098/3315/6556/148022/2207/405/972/5452/3133/10538/1991/56848/5293/1436/4088/79792/64170/2048/2867/3596/3134/3659/5027/5045/6777/64109/566/2219/5004/6348/…
BP	GO:0032715	negative regulation of interleukin-6 production	39	0.50938	1.79173	0.00165174	0.0394977	0.034508	2260	tags=41%, list=17%, signal=34%	5777/9466/1445/140885/7124/11006/409/10365/3635/408/79671/671/5004/3071/27202/2693
BP	GO:0010875	positive regulation of cholesterol efflux	24	0.589227	1.84959	0.00167658	0.0399672	0.0349183	399	tags=25%, list=3%, signal=24%	10347/4792/6256/2874/7376/4035
BP	GO:2000819	regulation of nucleotide-excision repair	26	0.572512	1.82815	0.00172553	0.0410067	0.0358264	1310	tags=42%, list=10%, signal=38%	8289/6604/6601/6597/6603/60/9275/9274/6602/6598/6599
BP	GO:0002431	Fc receptor mediated stimulatory signaling pathway	30	0.539078	1.79644	0.00176003	0.0416974	0.0364299	1806	tags=43%, list=14%, signal=38%	5580/2268/25/3055/1445/6714/6850/5338/2207/55198/4067/7409/7410
CC	GO:0019898	extrinsic component of membrane	245	0.312665	1.49317	0.00179449	0.042383	0.0370289	2510	tags=27%, list=19%, signal=22%	2185/6277/2783/2268/2242/207/4926/11152/2787/5127/9810/3055/2769/653361/2778/2771/6714/5371/26100/8514/6850/37/79058/3728/9021/6768/8897/9267/274/23130/2280/85377/2782/10188/8408/1271/2767/9921/3092/23344/5293/7204/4067/7879/566/2219/23098/1500/7316/5879/9776/22848/23533/5329/525/5753/55697/23513/1003/2802/1399/27124/51025/27163/10297
CC	GO:0000502	proteasome complex	51	-0.425069	-1.75004	0.00182605	0.0429962	0.0375647	2227	tags=47%, list=17%, signal=39%	9097/5707/5713/5702/5718/5695/23198/5685/5686/5684/9861/5706/5689/5716/5691/5701/5683/5688/51377/5710/5682/5692/5717/5700
BP	GO:0045621	positive regulation of lymphocyte differentiation	120	0.371713	1.61249	0.00183474	0.0430688	0.0376281	2006	tags=29%, list=15%, signal=25%	8289/6604/101/6601/6597/6603/60/11006/57178/3635/8943/54440/3135/51043/6850/6602/3566/5914/3561/2309/3965/6598/3707/972/864/6599/572/604/55626/6777/9092/3071/10524/6469/10288
BP	GO:0031110	regulation of microtubule polymerization or depolymerization	72	0.422205	1.6825	0.00186795	0.0437145	0.0381922	2774	tags=42%, list=21%, signal=33%	1639/2242/4926/55201/25/9181/2288/58526/10300/10634/28964/4204/6904/10013/84722/24139/5879/55755/25876/59341/1003/50861/3303/27124/22924/10297/1859/5058/11075/29098
BP	GO:0043534	blood vessel endothelial cell migration	109	0.369857	1.58133	0.00188754	0.0439675	0.0384132	2984	tags=36%, list=23%, signal=28%	2185/10014/25865/207/7040/4627/25/1201/7124/1460/3162/3728/9314/6776/3164/5335/3315/493/4204/6667/4851/51564/7422/1969/6915/84830/949/1003/23616/2113/335/4215/8817/285/2876/22846/5025/29775/1960
BP	GO:0009895	negative regulation of catabolic process	255	0.313418	1.50428	0.00189021	0.0439675	0.0384132	2558	tags=30%, list=19%, signal=25%	2316/8263/7249/7917/207/706/5768/1471/51035/1981/7157/9261/7124/23400/8241/4615/5476/55544/5371/51322/3162/5970/7538/6625/9704/6449/2931/10919/9191/64784/7076/3607/5300/26580/56478/11180/28996/26073/11187/6556/11178/9491/493/6599/2801/7077/28964/1869/4088/26471/9641/5045/6048/10670/65018/23450/1459/8148/6469/54922/10869/65992/1676/23274/5465/9683/336/116986/10755/64223/84861/4843/8140/1432/55625/…
BP	GO:0043393	regulation of protein binding	164	0.34788	1.57012	0.00192807	0.0446557	0.0390145	2619	tags=32%, list=20%, signal=26%	8751/10014/5580/6604/207/10273/8536/25/489/4035/60/5986/6714/409/2962/4242/23129/8189/2033/10211/118/3297/5566/5595/488/1855/5300/2280/5499/28996/26073/1020/148022/2801/2011/1026/1636/1663/3300/5465/4318/6590/26206/581/22924/56998/1522/4221/6737/7015/7122/3077/4140
BP	GO:0001933	negative regulation of protein phosphorylation	252	0.312733	1.49804	0.00193143	0.0446557	0.0390145	2820	tags=31%, list=21%, signal=25%	5339/5777/5580/578/7249/64780/207/1050/7040/79643/10636/5585/1981/25/5987/140885/23770/2950/4035/11006/409/23636/58190/9647/2022/5518/9021/1845/29108/1032/7016/1855/50855/58509/3315/9961/10019/84619/10106/10507/6895/1026/23624/4067/6609/2048/55861/57493/25793/4298/1609/54922/103/55755/3725/2041/11314/5753/81848/4771/801/581/1399/5770/27124/4221/4092/5575/1849/26146/5062/1030/7070/1848/8651/11117/…
BP	GO:0071675	regulation of mononuclear cell migration	104	0.382521	1.61372	0.00194036	0.0447273	0.0390771	2178	tags=26%, list=16%, signal=22%	2185/207/101/6688/9466/11151/4478/6793/25/7124/728/80024/177/5595/811/29108/11240/3965/8764/1436/4067/3958/6348/84830/1230/59341/79647
BP	GO:0022900	electron transport chain	134	-0.31762	-1.55852	0.00196458	0.0451501	0.0394465	3022	tags=37%, list=23%, signal=29%	4725/8630/3620/1337/4724/4694/4129/10165/2110/4722/4200/8560/9167/4695/11232/8574/6390/10891/51103/1350/1536/4697/1340/4698/314/23369/54205/128/1716/1329/4701/4720/4700/29796/1345/10495/2108/4726/444/1738/6392/1353/7381/4702/1347/1348/7385/11315/4711
BP	GO:0000027	ribosomal large subunit assembly	21	-0.584142	-1.91939	0.00199257	0.0452514	0.039535	1113	tags=52%, list=8%, signal=48%	55052/6125/55299/140801/6175/6135/22868/6169/6128/6152/6147
BP	GO:2000251	positive regulation of actin cytoskeleton reorganization	18	0.628275	1.84632	0.00198995	0.0452514	0.039535	1971	tags=44%, list=15%, signal=38%	2242/25/3055/3059/3265/1020/54828/10458
CC	GO:0016514	SWI/SNF complex	26	0.567639	1.81259	0.00197881	0.0452514	0.039535	1739	tags=46%, list=13%, signal=40%	8289/6604/6601/6597/6603/60/9275/9274/6602/6598/6599/9437
BP	GO:0006654	phosphatidic acid biosynthetic process	25	0.5685	1.80272	0.00198222	0.0452514	0.039535	1876	tags=48%, list=14%, signal=41%	8525/56894/10554/10555/1606/5338/8527/79888/254531/79575/1608/1609
BP	GO:0002700	regulation of production of molecular mediator of immune response	157	0.34108	1.5307	0.00200901	0.0453564	0.0396267	1610	tags=25%, list=12%, signal=23%	6778/7040/9466/5585/2821/9261/7124/11006/4615/6830/10859/7133/54440/3162/3135/6850/975/3566/80762/29108/3105/11331/8764/3098/148022/8741/972/3718/3133/7293/79004/56848/79671/64170/2048/2867/3596/604/3134/5027
BP	GO:0010256	endomembrane system organization	405	0.281902	1.40342	0.00200718	0.0453564	0.0396267	2251	tags=25%, list=17%, signal=21%	5339/1639/10347/5605/9146/5580/8878/7917/207/23399/79643/5119/4627/399687/79803/1201/537/8815/79720/527/27183/2647/738/1785/51112/23207/8943/10494/2580/9144/26993/208/51160/81876/10211/6280/8676/6449/5595/2934/64598/274/6811/79065/488/8291/64689/11018/215/85377/3257/259173/91782/29927/10043/5798/55666/9145/10397/535/50807/4000/23344/2801/79585/3064/51308/162/55113/55361/309/9296/6609/9368/5027/56…
BP	GO:0098780	response to mitochondrial depolarisation	17	0.647725	1.85946	0.00201693	0.0454016	0.0396662	2420	tags=65%, list=18%, signal=53%	8878/2874/11140/10013/55626/65018/79594/27429/10075/9776/7416
BP	GO:0009135	purine nucleoside diphosphate metabolic process	90	0.399038	1.64297	0.00203357	0.0455092	0.0397602	2402	tags=31%, list=18%, signal=26%	7167/11182/51341/3101/5315/2821/5211/4967/226/2033/79873/3607/2584/3098/2987/405/5207/572/28964/26471/5027/4354/5313/5214/5465/3643/64223/5223
BP	GO:0009179	purine ribonucleoside diphosphate metabolic process	90	0.399038	1.64297	0.00203357	0.0455092	0.0397602	2402	tags=31%, list=18%, signal=26%	7167/11182/51341/3101/5315/2821/5211/4967/226/2033/79873/3607/2584/3098/2987/405/5207/572/28964/26471/5027/4354/5313/5214/5465/3643/64223/5223
BP	GO:2000249	regulation of actin cytoskeleton reorganization	35	0.520276	1.78809	0.00205927	0.0459504	0.0401457	1971	tags=37%, list=15%, signal=32%	2185/2242/396/25/3055/7226/3059/3265/1613/1020/1436/54828/10458
BP	GO:0008064	regulation of actin polymerization or depolymerization	118	0.365944	1.57658	0.00209636	0.0466425	0.0407503	2477	tags=32%, list=19%, signal=26%	2185/5580/11151/2314/3055/5216/7408/832/6709/11344/3059/23406/822/7454/118/10602/2934/10093/29108/274/51466/9948/54961/10435/54434/6369/23580/3071/10458/1627/5341/11135/26999/64223/50853/2885/23616/10095
BP	GO:0002262	myeloid cell homeostasis	146	0.349641	1.55293	0.00210332	0.046662	0.0407673	2459	tags=34%, list=19%, signal=28%	2539/578/6688/51341/10370/2821/10320/22985/10365/3635/3162/3059/7538/8861/23385/8314/2309/54681/677/28996/10019/3707/3579/405/3718/51621/55113/5293/7067/4067/604/1777/6777/211/51327/3071/2068/3624/7422/103/3784/57817/212/581/3303/1054/2176/1432/2113
BP	GO:1900026	positive regulation of substrate adhesion-dependent cell spreading	40	0.495389	1.75821	0.0021098	0.0466711	0.0407753	2952	tags=40%, list=22%, signal=31%	2316/5034/25/1785/3611/811/7016/5879/5881/1399/335/10562/6281/673/4192/1398
BP	GO:0002719	negative regulation of cytokine production involved in immune response	34	0.515763	1.76152	0.0021238	0.046763	0.0408556	3799	tags=62%, list=29%, signal=44%	7040/7124/11006/10859/3162/3718/79004/79671/604/3134/5553/336/4092/3077/335/54/64127/7043/50943/3440/7042
BP	GO:0034101	erythrocyte homeostasis	116	0.377588	1.62173	0.00212615	0.046763	0.0408556	2459	tags=34%, list=19%, signal=28%	2539/6688/51341/10370/2821/10320/22985/10365/3635/3162/3059/7538/8861/8314/2309/54681/677/28996/10019/405/3718/51621/7067/4067/604/1777/6777/211/51327/3071/2068/3624/7422/103/3784/212/3303/1054/1432/2113
BP	GO:1903146	regulation of autophagy of mitochondrion	33	0.523653	1.77665	0.00215079	0.0470054	0.0410674	1962	tags=45%, list=15%, signal=39%	7249/706/7157/23400/6721/2931/10715/3064/10013/55626/65018/1459/25793/27429/10645
BP	GO:0061912	selective autophagy	62	0.447468	1.73966	0.00216867	0.0470054	0.0410674	2420	tags=42%, list=18%, signal=34%	8878/7249/2548/7157/26100/23647/23192/5595/23130/550/11140/11331/8408/10715/3064/51368/10013/55626/7879/65018/27429/10075/9776/65992/9706/7416
BP	GO:0031663	lipopolysaccharide-mediated signaling pathway	56	0.453106	1.72773	0.00219228	0.0470054	0.0410674	1724	tags=32%, list=13%, signal=28%	207/6688/7040/4792/3055/11027/3661/7124/4615/5595/59307/3654/58509/148022/23328/4067/671/6348
BP	GO:0032642	regulation of chemokine production	81	0.412334	1.6804	0.00216865	0.0470054	0.0410674	2065	tags=32%, list=16%, signal=27%	23765/3570/140885/7124/2950/11006/4615/3162/6850/3566/177/59307/9314/29108/4155/3965/148022/972/1991/1436/64170/2867/566/79594/1969/59341
BP	GO:0001843	neural tube closure	73	0.414156	1.66006	0.00219165	0.0470054	0.0410674	1742	tags=30%, list=13%, signal=26%	6692/7249/10370/7040/23654/25/5216/7408/9968/5914/5566/6768/6046/1855/8543/4524/10522/8321/54910/1857/2535/10653
BP	GO:0060606	tube closure	73	0.414156	1.66006	0.00219165	0.0470054	0.0410674	1742	tags=30%, list=13%, signal=26%	6692/7249/10370/7040/23654/25/5216/7408/9968/5914/5566/6768/6046/1855/8543/4524/10522/8321/54910/1857/2535/10653
CC	GO:0005766	primary lysosome	126	0.360631	1.57267	0.00217018	0.0470054	0.0410674	2693	tags=37%, list=20%, signal=30%	311/5580/6813/4125/2548/2896/968/10383/527/5476/203068/10970/10493/80142/23385/54472/29108/2512/5660/11240/8904/10043/47/9145/5036/1991/79888/967/8635/671/4069/3916/566/4353/3073/1778/5878/7415/2171/2588/10487/5834/2760/5657/5284/2720/1669
CC	GO:0042582	azurophil granule	126	0.360631	1.57267	0.00217018	0.0470054	0.0410674	2693	tags=37%, list=20%, signal=30%	311/5580/6813/4125/2548/2896/968/10383/527/5476/203068/10970/10493/80142/23385/54472/29108/2512/5660/11240/8904/10043/47/9145/5036/1991/79888/967/8635/671/4069/3916/566/4353/3073/1778/5878/7415/2171/2588/10487/5834/2760/5657/5284/2720/1669
BP	GO:0090132	epithelium migration	270	0.301212	1.45051	0.00219196	0.0470054	0.0410674	2984	tags=30%, list=23%, signal=24%	2185/10014/25865/57175/207/5829/7040/2896/4627/11151/5585/25/1201/5216/2821/7124/51157/6714/1460/23129/3162/9647/3728/64218/9314/811/388/7016/6776/3164/51466/14/5335/9922/3315/493/8742/23328/4204/5293/51094/6667/10013/6237/3868/54828/57142/5879/4851/11156/51564/7422/1969/6915/2196/84830/949/1512/3725/4318/5646/10755/1003/23616/2113/25959/6286/23598/335/4215/3640/8817/285/1907/2876/22846/5025/2324…
MF	GO:0005200	structural constituent of cytoskeleton	98	0.389986	1.63625	0.00219878	0.0470135	0.0410744	3112	tags=38%, list=24%, signal=29%	5339/7431/4478/7094/6709/10383/60/10381/203068/440915/10093/10376/7283/7278/3881/3092/4000/84790/10174/3866/5630/3868/51807/80086/8419/50853/10095/286/10880/636/10094/84823/3857/23136/347733/51412/10382
BP	GO:0002523	leukocyte migration involved in inflammatory response	18	0.622754	1.8301	0.00224065	0.0475472	0.0415407	1845	tags=44%, list=14%, signal=38%	101/240/7124/6280/4814/1991/2867/2529
BP	GO:0006476	protein deacetylation	92	0.393913	1.62946	0.00223145	0.0475472	0.0415407	2636	tags=35%, list=20%, signal=28%	2316/10014/25865/9112/1487/10432/7157/10474/1107/26993/51043/11176/2033/54815/25855/53615/23309/56848/604/10013/65018/51564/7422/6497/54531/10270/57805/51547/6907/8841/1859/1108
BP	GO:0010631	epithelial cell migration	268	0.302745	1.46043	0.00224232	0.0475472	0.0415407	2984	tags=31%, list=23%, signal=24%	2185/10014/25865/57175/207/5829/7040/2896/4627/11151/5585/25/1201/5216/2821/7124/51157/6714/1460/23129/3162/9647/3728/64218/9314/811/388/7016/6776/3164/51466/14/5335/9922/3315/493/8742/23328/4204/5293/51094/6667/10013/6237/3868/54828/57142/5879/4851/11156/51564/7422/1969/6915/2196/84830/949/1512/3725/4318/5646/10755/1003/23616/2113/25959/6286/23598/335/4215/3640/8817/285/1907/2876/22846/5025/2324…
CC	GO:0032040	small-subunit processome	28	-0.524363	-1.86237	0.00225862	0.0475901	0.0415782	1632	tags=43%, list=12%, signal=38%	10436/2091/10813/25983/55272/11103/55813/10199/7520/51077/55127/10885
BP	GO:0051209	release of sequestered calcium ion into cytosol	104	0.38032	1.60444	0.00226601	0.0475901	0.0415782	2694	tags=31%, list=20%, signal=25%	2185/2316/5777/57192/1729/11151/25/7226/80024/5566/2280/10523/5335/54923/3064/2946/2812/22821/4067/6261/3596/5027/6348/3954/5031/2829/801/581/53373/2815/8996/7070
BP	GO:2000045	regulation of G1/S transition of mitotic cell cycle	133	0.362245	1.59149	0.00227375	0.0475901	0.0415782	1488	tags=24%, list=11%, signal=22%	8289/5777/6604/207/6601/6597/1981/10263/7157/10197/896/6603/60/5371/51322/56257/58190/9275/9274/6602/8558/9314/1032/6598/138151/6599/10106/7027/55198/26058/1869/1026
BP	GO:0007163	establishment or maintenance of cell polarity	192	0.320495	1.48057	0.00227535	0.0475901	0.0415782	2397	tags=27%, list=18%, signal=23%	23625/2185/2319/1639/391/10312/4926/4627/4478/399687/25/5880/9826/60/3611/10494/2934/9267/388/6548/81609/50855/9578/9948/4000/79585/2011/23433/389/3064/4134/23094/29780/9368/3071/10653/6794/10524/54828/5879/2294/6469/55755/25794/5881/64083/10487/23513/1003/1399/3996/23616
BP	GO:0030003	cellular cation homeostasis	392	0.281118	1.39399	0.00226154	0.0475901	0.0415782	2773	tags=25%, list=21%, signal=20%	2185/2316/6522/5777/578/57192/2907/28952/10312/1729/2896/57130/11151/55630/25/1201/489/537/527/23400/5371/8943/3162/7226/23241/7531/80024/6280/5566/5595/9114/811/80762/2512/6548/488/2280/9997/10523/9777/5335/6556/493/54923/535/155066/6553/3064/1991/2946/475/309/2812/22821/51024/9296/4067/6261/6337/3596/3934/5023/5027/23315/7879/6348/3954/794/4097/5031/84560/1230/59341/6507/57817/2829/525/4494/801…
BP	GO:0034248	regulation of cellular amide metabolic process	346	-0.241457	-1.33677	0.00229262	0.047821	0.0417799	2139	tags=27%, list=16%, signal=23%	60558/10492/54505/4691/23107/6093/5997/29063/23173/10131/10128/55140/54103/55024/5073/8301/201626/27257/23404/10600/5165/1975/9475/79068/1660/836/8892/1968/28958/6208/1977/25983/23369/29883/79072/2107/6125/8507/4690/10643/406991/253943/4116/6451/6197/6198/5436/5935/113251/11340/1653/55037/64506/28969/4528/22868/6059/8664/8872/6169/23521/4292/2332/10418/5393/51334/8846/3458/1965/1617/23657/9221/56…
MF	GO:0016408	C-acyltransferase activity	16	-0.606858	-1.81489	0.00233489	0.0485708	0.0424351	3120	tags=56%, list=24%, signal=43%	123876/55304/38/3032/10449/6296/171546/6342/10558
BP	GO:0051090	regulation of DNA-binding transcription factor activity	353	0.290203	1.42349	0.00235473	0.0488511	0.0426799	3165	tags=31%, list=24%, signal=24%	2316/2319/10014/25865/207/28952/101/6688/51341/4792/6597/4793/9181/5987/3055/55182/7124/8986/4615/409/602/3162/5970/6850/3059/2033/3728/10211/6280/3297/177/5595/59307/408/9314/51389/29108/25855/64784/7706/3654/9817/3965/11331/8553/58509/28996/6598/4794/148022/23082/4762/8321/7293/3551/54101/7027/28232/1869/4088/26471/8517/64170/83696/9641/2535/23373/65018/10616/4188/5526/6469/4985/7422/8737/9830/…
BP	GO:0006470	protein dephosphorylation	190	0.327496	1.51	0.00236206	0.0488711	0.0426974	2370	tags=32%, list=18%, signal=26%	5777/5580/23645/23399/7040/22870/7124/26469/2771/5496/7529/1460/58190/6992/6305/7531/5725/8189/9647/5518/8897/1845/5300/2280/1827/5528/9150/5499/994/5786/54961/10106/3064/51231/3551/5791/54434/80895/6609/5536/3958/55626/5520/5531/3071/1844/65018/6794/5526/9701/11156/10288/5511/11314/9110/5780/801/1003/5770/23141
BP	GO:0032602	chemokine production	82	0.410343	1.67741	0.00237541	0.0489682	0.0427822	2065	tags=32%, list=16%, signal=27%	23765/3570/140885/7124/2950/11006/4615/3162/6850/3566/177/59307/9314/29108/4155/3965/148022/972/1991/1436/64170/2867/566/79594/1969/59341
BP	GO:0071496	cellular response to external stimulus	272	0.302523	1.45712	0.00237951	0.0489682	0.0427822	2953	tags=29%, list=22%, signal=23%	5339/7942/4055/578/7351/2242/6494/6256/10226/11337/11152/55630/1981/7157/968/23334/7392/4615/9780/26100/3162/6721/1265/2022/5595/8897/2309/10919/6548/26001/10634/8408/9681/4790/25828/978/1312/572/79792/1026/4067/3596/3659/6667/5027/55626/10670/7132/10524/26/943/4654/9463/58528/8131/54361/79726/23274/5465/10514/64223/3992/8792/8140/25959/2353/28960/3191/1030/8061/2621/2350/8428/4521/632/7378/2909/…
BP	GO:0045428	regulation of nitric oxide biosynthetic process	50	0.450887	1.67703	0.00239024	0.0490575	0.0428602	2294	tags=36%, list=17%, signal=30%	2185/207/706/140885/7124/8570/1785/10365/9314/148022/493/4088/435/5879/23564/947/3643/445
BP	GO:1904356	regulation of telomere maintenance via telomere lengthening	47	-0.436339	-1.7602	0.0023976	0.0490772	0.0428774	882	tags=30%, list=7%, signal=28%	5588/545/908/472/10575/3183/140609/3181/25913/22948/10576/7520/10694/3178
BP	GO:0051282	regulation of sequestering of calcium ion	106	0.382587	1.62678	0.00244352	0.0495343	0.0432768	2694	tags=31%, list=20%, signal=25%	2185/2316/5777/57192/1729/11151/25/7226/80024/5566/2280/10523/5335/54923/3064/2946/309/2812/22821/4067/6261/3596/5027/6348/3954/5031/2829/801/581/53373/2815/8996/7070
BP	GO:0051222	positive regulation of protein transport	258	0.307622	1.48006	0.00243904	0.0495343	0.0432768	3486	tags=36%, list=26%, signal=27%	10155/2316/5580/6844/101/7040/3689/8536/399687/1201/5880/7124/23400/7376/6714/26229/6721/208/7226/7531/3059/975/3265/3728/9854/51160/5566/8314/2931/50855/9777/1020/51614/4947/55741/3651/65985/572/10425/4088/2850/51024/3596/11132/5027/10307/65018/6810/1459/54828/8447/6469/27429/10075/9776/5950/89781/1263/64083/5106/79778/1432/8841/55823/9520/2621/8934/4836/2810/22994/10497/2852/9531/5319/2737/5116…
CC	GO:0030133	transport vesicle	327	0.290793	1.42071	0.00244574	0.0495343	0.0432768	2371	tags=26%, list=18%, signal=22%	6844/22937/6494/25844/10226/5127/1201/537/3055/1212/527/23400/3107/4900/6721/9144/3135/10961/8677/553115/11316/81876/8676/23385/598/3106/8906/9114/274/6811/10945/6396/9632/57799/3105/9922/79641/1211/5798/51107/11014/9145/972/535/10652/155066/3133/162/54910/10567/29988/9296/9570/3134/5045/7879/5016/10618/1113/3916/51324/6810/6272/23423/2550/6861/9230/4985/9463/80023/2902/78992/11021/127833/3784/58…
BP	GO:0006873	cellular ion homeostasis	406	0.281568	1.40367	0.00243539	0.0495343	0.0432768	2773	tags=25%, list=21%, signal=20%	2185/2316/6522/5777/578/57192/2907/28952/10312/1729/2896/57130/11151/55630/25/1201/489/537/527/23400/5371/8943/3162/7226/23241/7531/80024/6280/5566/5595/9114/811/80762/2512/6548/488/1152/2280/9997/10523/9777/5335/6556/493/54923/535/155066/6553/3064/1991/2946/475/309/2812/22821/51024/9296/4067/6261/6337/9368/3596/3934/5023/5027/23315/7879/6348/3954/794/4097/5031/84560/1230/59341/6507/3784/57817/28…

## Sheet: NELFB_KEGG
ID	Description	setSize	enrichmentScore	NES	pvalue	p.adjust	qvalue	rank	leading_edge	core_enrichment
hsa03010	Ribosome	113	-0.548478	-2.64437	1e-10	3.33e-08	2.03158e-08	1722	tags=44%, list=13%, signal=39%	6217/9801/6223/51121/6194/6208/55052/6125/51021/6122/6227/140801/6175/6235/6135/6141/29074/9045/11222/29093/6169/23521/63931/6136/6137/6142/6133/6206/6128/6188/6230/6205/3921/6166/6130/6160/6138/6171/6124/51187/6189/6191/6152/6229/6210/6187/6129/6146/6147/9349
hsa04662	B cell receptor signaling pathway	76	0.531034	2.16017	4.1332e-07	6.88178e-05	4.19846e-05	2577	tags=54%, list=19%, signal=44%	5777/5605/207/4792/4793/79168/11027/5880/11006/10859/11025/3635/3636/208/5970/6850/975/3265/5595/11024/4794/4790/973/3551/5293/8517/4067/4772/5604/7409/974/5894/7410/5879/10288/3725/5881/4775/2885/2353/8519
hsa04062	Chemokine signaling pathway	171	0.416947	1.9117	9.64092e-07	0.000107014	6.52876e-05	3128	tags=41%, list=24%, signal=32%	2185/2870/5580/2783/2268/207/5829/4792/6464/4793/2787/3055/5880/653361/2771/6714/409/208/5970/3265/7454/5330/5566/5595/408/2309/2931/2782/5335/4790/3579/10235/3718/572/3551/5293/8517/4067/5331/5604/6369/6777/9844/7409/6773/6348/5894/7410/5879/1230/23533/5881/2829/1399/115/2885/53358/112/5058/10663/6654/107/673/2919/1398/113/2784/6774/387/2932
hsa05163	Human cytomegalovirus infection	203	0.397155	1.85651	1.48132e-06	0.00012332	7.52354e-05	3305	tags=43%, list=25%, signal=33%	2185/5605/2783/578/7249/207/3570/5829/4792/2787/7157/3661/5880/6892/7124/9826/9138/2778/2771/6714/3107/208/5970/3135/3265/1978/5330/5566/3106/5595/811/2782/3105/4790/1388/3579/2767/6199/3133/3551/2002/5293/1869/1026/8517/5331/3134/4772/6667/5604/7132/6348/5894/5879/6300/7422/8737/1230/5881/1019/4775/595/801/581/1399/115/2885/1432/5732/112/51806/6654/107/10488/3587/5600/1398/113/2784/6774/387/2932…
hsa04666	Fc gamma R-mediated phagocytosis	87	0.494991	2.05134	2.35188e-06	0.000130529	7.96339e-05	2101	tags=44%, list=16%, signal=37%	5580/207/3055/5880/7408/23396/653361/65108/10163/8681/1785/3985/3635/1072/3636/208/6850/7454/5595/2934/10093/274/5335/5338/6199/50807/56848/5293/4067/5604/7409/5894/7410/4082/5879/8394/8936/8877
hsa05135	Yersinia infection	127	0.445566	1.94516	2.07969e-06	0.000130529	7.96339e-05	2542	tags=41%, list=19%, signal=33%	2185/5605/207/391/5829/4792/3678/5585/920/3661/5880/7124/9138/6195/23396/60/4615/6714/10163/208/5970/147179/7454/5595/10093/29108/63916/3654/5335/4790/148022/10454/3551/5293/8517/4772/5604/9844/7409/6196/7410/5879/8394/10458/6300/3725/5881/4775/1399/1432/10095/2353
hsa04144	Endocytosis	208	0.382078	1.79346	5.49828e-06	0.000261561	0.000159574	2143	tags=31%, list=16%, signal=26%	56904/2870/23550/9146/377/381/27128/79643/5119/1212/161/832/9744/79720/10938/27183/23396/6714/409/1785/6455/5371/3107/116985/1175/3135/3265/147179/51160/3561/3106/408/9267/10093/274/9266/57154/50855/84364/3105/9922/91782/1211/5338/1173/3579/50807/3133/28964/4088/23624/3134/29924/7879/51324/3310/55738/9230/8394/11021/5878/163/5869/80223
hsa05220	Chronic myeloid leukemia	73	0.499715	2.00567	9.00515e-06	0.000299872	0.000182947	2414	tags=48%, list=18%, signal=39%	5605/578/207/1487/7040/4792/6464/25/7157/208/5970/3265/598/5595/6776/369/4790/572/3551/5293/1869/4088/1026/8517/5604/6777/5894/613/1488/1019/595/581/1399/2885/53358
hsa04142	Lysosome	117	0.433926	1.87453	8.67475e-06	0.000299872	0.000182947	2912	tags=47%, list=22%, signal=37%	4125/1509/57192/2548/10312/1497/1201/537/968/1212/1200/527/5476/3425/8943/51172/6448/4668/8906/3423/9114/138050/5660/20/1211/4669/6556/1508/4758/23163/535/162/967/6609/1777/3916/53/3073/6272/23062/23659/8722/2588/1512/8218/1174/2760/1522/533/2720/8372/10053/9516/54/26088
hsa05171	Coronavirus disease - COVID-19	215	-0.328457	-1.7129	7.77674e-06	0.000299872	0.000182947	1955	tags=27%, list=15%, signal=23%	29110/8503/6164/1536/3444/6217/6223/51121/730/6194/5295/59272/5336/6208/5290/51135/6125/6122/6227/140801/6175/6235/6135/6141/2212/9045/6169/23521/6136/5291/6137/6142/6133/6206/6128/6188/6230/6205/3921/6166/6130/6885/6160/6138/6171/6124/51187/6189/6191/6152/6229/6210/6187/834/6129/6146/6147/9349
hsa04722	Neurotrophin signaling pathway	111	0.444395	1.91056	1.26344e-05	0.000328744	0.000200561	3306	tags=51%, list=25%, signal=39%	5605/5580/396/207/4792/6464/4793/25/10603/7157/9261/6195/208/5970/7531/3265/5595/2309/25970/3654/5335/10019/4794/4790/5598/818/2889/572/3551/5293/5604/6196/5894/6272/5879/398/6300/816/3725/801/581/1399/2885/53358/1432/4215/51806/6654/4145/673/5600/1398/387/2932/5594/91860/627
hsa04072	Phospholipase D signaling pathway	134	0.417373	1.8463	1.10832e-05	0.000328744	0.000200561	2414	tags=33%, list=18%, signal=27%	2185/5605/7249/207/8525/27128/6464/23396/2778/8681/1785/56894/208/6850/10554/5900/3265/10555/5330/1606/5595/9267/9266/9170/5335/5338/3579/2207/56848/5293/8527/5331/5604/6237/5894/1608/1609/8394/8877/23533/3643/115/2885/53358
hsa05131	Shigellosis	197	0.381186	1.77953	1.28338e-05	0.000328744	0.000200561	2034	tags=31%, list=15%, signal=27%	5580/81/826/8878/10318/207/27128/1729/5829/4792/3678/4793/3101/9181/7157/3661/5216/7094/7124/60/4615/87/6714/10163/26100/3611/208/5970/823/3059/5330/598/5595/9267/2309/10093/2931/29108/63916/9266/7322/960/3098/5335/4790/6199/10454/3551/5293/8517/5331/9844/10670/7132/10616/7316/5879/6300/58528/8936/8737
hsa04380	Osteoclast differentiation	123	0.43368	1.89309	1.99667e-05	0.000369383	0.000225355	2062	tags=35%, list=16%, signal=30%	3727/4791/8878/207/6688/7040/4792/7297/79168/11027/140885/3726/7124/2355/653361/11006/10859/5971/11025/208/5970/6850/9021/5595/4689/11024/10326/10379/2354/4790/10454/3551/5293/1436/8517/4772/5604/6773/7132/5879/6300/10288/7305
hsa05225	Hepatocellular carcinoma	149	0.412243	1.85876	1.8802e-05	0.000369383	0.000225355	2510	tags=35%, list=19%, signal=29%	8289/5605/578/6604/207/7040/6601/6464/6597/7157/6603/2950/60/23401/3162/208/6602/3265/598/5595/1855/9817/5335/6598/369/6199/8321/6599/572/2944/2946/2002/5293/1869/4088/1026/2947/1857/5604/2535/5894/10587/54361/1019/595/2948/581/2885/53358/8312/7015/10297
hsa05130	Pathogenic Escherichia coli infection	173	0.384668	1.76463	1.93234e-05	0.000369383	0.000225355	2773	tags=36%, list=21%, signal=29%	5777/578/27128/4792/4627/4793/25/9181/4542/10383/7124/9826/9138/60/4615/6714/10163/10381/203068/5970/3059/147179/5595/9267/10093/10376/29108/9266/9632/3654/7278/9170/4790/10454/84790/4640/3551/8517/9368/79784/24146/7132/3071/5879/10458/6300/8936/8737/10061/1364/51807/3725/26999/581/1432/10095/7122/2353/5058/4643/5062/10094/375
hsa05166	Human T-cell leukemia virus 1 infection	205	0.373256	1.74819	1.8696e-05	0.000369383	0.000225355	2785	tags=39%, list=21%, signal=31%	4055/4791/5605/3683/207/6688/706/7040/4792/3689/920/7157/7094/2874/8295/896/7124/29882/3107/5971/208/5970/3135/3265/2033/7538/3561/598/5566/3106/5595/8498/811/6776/64784/3105/4790/1388/293/3718/3133/3551/2002/5293/1869/4088/1026/8517/898/8379/3383/3134/4772/5604/6777/23373/7132/10524/1959/3725/1019/4775/595/55697/581/115/7416/25906/2113/7015/2353/1958/4215/112/1030/8061/107/916/3111/10488
hsa05132	Salmonella infection	218	0.36286	1.71082	1.87447e-05	0.000369383	0.000225355	2349	tags=33%, list=18%, signal=27%	2316/1639/5605/578/207/27128/391/23339/4792/5585/5216/10383/7124/60/10121/4615/1785/23207/10381/203068/208/5970/9842/23265/8677/3265/5595/9267/10093/10376/388/29108/63916/9266/3831/29109/3840/3654/7278/10120/4790/83658/25828/10454/84790/10540/64601/3551/5293/79792/8517/5604/6237/7879/9844/7132/3071/5894/1778/5879/64837/6300/8737/5878/51807/5869/3725/4636/26999/581/11258
hsa05221	Acute myeloid leukemia	66	0.509712	2.00338	2.41652e-05	0.00040235	0.000245467	1759	tags=39%, list=13%, signal=34%	5605/207/1050/6688/5371/208/5970/3265/3728/5914/1978/5595/6776/369/4790/6199/1053/572/3551/5293/1436/8517/5604/6777/4353/5894
hsa04010	MAPK signaling pathway	274	0.349529	1.67319	2.30265e-05	0.00040235	0.000245467	2985	tags=35%, list=23%, signal=28%	3727/2316/4791/5605/207/1616/7040/7157/5880/9261/7124/6195/8986/4615/409/8681/5971/7867/208/5970/4296/3265/9064/5566/5595/408/1845/3164/11184/2323/3654/3315/23162/782/369/5871/4790/10235/5598/994/10454/51295/2872/3551/2002/1436/7423/9344/8517/5536/4772/5604/6237/2251/7132/6196/1844/5894/3310/1944/5879/8569/6300/7422/1969/3725/5881/4775/3643/7786/8913/3303/1399/2885/1432/773/2353/4215/1849/5058/88…
hsa04015	Rap1 signaling pathway	190	0.377418	1.75136	2.59643e-05	0.00041172	0.000251184	3352	tags=39%, list=25%, signal=30%	5605/25865/3683/207/6494/3689/10636/5216/7094/5880/7408/60/2778/2771/6714/208/5900/3265/5330/5595/51466/50855/9170/5335/10235/2889/23094/5293/1436/7423/5331/5604/6237/2251/7409/26037/54518/5894/7410/1500/1944/5879/6300/7422/1969/2902/5881/3643/801/1399/115/1432/112/51806/8817/1945/107/2904/285/673/2261/2324/5600/1398/113/1813/1943/9855/387/3937/109/5594/91860/51378
hsa04912	GnRH signaling pathway	81	0.475408	1.94924	4.22836e-05	0.00064002	0.000390466	3309	tags=49%, list=25%, signal=37%	2185/5605/5580/2778/6714/8681/3265/5330/5566/5595/5338/5598/818/2767/2797/2002/5331/5604/5894/6300/816/3725/801/115/2885/1432/1958/4215/112/51806/6654/107/5600/113/779/109/4313/5594/91860/2798
hsa05231	Choline metabolism in cancer	86	0.455122	1.88462	5.55243e-05	0.000803895	0.000490443	2381	tags=41%, list=18%, signal=34%	5605/7249/207/8525/5880/23396/10163/8681/208/5900/3265/7454/1978/1606/5595/5335/5338/1119/6199/5293/8527/6667/5604/5894/1608/1120/1609/5879/8394/8936/80736/3725/5881/5130/2885
hsa04370	VEGF signaling pathway	53	0.514323	1.96151	6.53584e-05	0.000870573	0.000531123	2194	tags=43%, list=17%, signal=36%	5605/207/5829/5880/9261/6714/8681/7867/208/3265/5595/5335/3315/572/56848/5293/5604/5894/5879/6300/7422/8877/5881
hsa05203	Viral carcinogenesis	157	0.383504	1.73777	6.45026e-05	0.000870573	0.000531123	2381	tags=38%, list=18%, signal=31%	4055/4791/10014/81/578/5829/4792/7157/5315/3661/9261/896/87/6714/7529/3107/5970/3135/7531/6850/3665/3265/2033/5566/3106/5595/2934/9114/1642/6776/10379/3105/4790/1388/3718/3133/572/5293/2968/1026/8517/4067/898/8379/3134/10013/6777/5879/51564/1959/23352/3725/7187/1019/595/55697/23513/581/2885
hsa05167	Kaposi sarcoma-associated herpesvirus infection	176	0.382897	1.75814	6.90022e-05	0.000883758	0.000539167	2452	tags=34%, list=19%, signal=28%	5605/2783/578/207/4792/7297/2787/7157/3055/3661/9261/6714/3107/208/5970/3135/6850/3665/3265/2033/7538/3106/5595/1827/2782/10379/3105/5335/4790/148022/3133/3551/5293/1869/1026/8517/4067/3383/3134/4772/5604/9641/6773/7132/5894/7316/5879/6300/7422/1230/23533/3725/7187/1019/4775/595/801/581/100507436/1432
hsa05165	Human papillomavirus infection	298	0.332344	1.60891	9.11554e-05	0.00112425	0.000685887	2510	tags=30%, list=19%, signal=24%	5605/578/7249/207/10312/5829/7297/3678/537/7157/5315/3661/896/7124/527/2778/10474/5986/3107/4242/3695/1298/208/5970/3135/3265/2033/1978/5518/5566/3106/5595/7283/9114/1855/5528/4855/50855/10379/3105/4790/148022/6199/535/155066/8321/3133/572/7059/3551/5293/1869/55844/1026/9296/8517/9368/898/1857/3134/3659/5604/9641/5520/2535/10319/1292/6773/7132/7148/5894/5526/4851/9794/7422/54361/23352/7187/525/10…
hsa04613	Neutrophil extracellular trap formation	104	0.431989	1.84363	0.000119863	0.00139677	0.000852147	1979	tags=35%, list=15%, signal=30%	5605/10014/3683/207/3689/5880/27180/653361/60/728/6714/10105/208/5970/6850/6404/5330/177/5595/4689/23569/5335/4790/293/1991/5293/79792/5331/10013/5604/566/4353/5894/5879/6300/51564
hsa05161	Hepatitis B	152	0.37939	1.71758	0.000121641	0.00139677	0.000852147	2452	tags=35%, list=19%, signal=29%	2185/5605/207/6778/7040/4792/7297/537/7157/3661/7124/4615/6714/7529/208/5970/3665/3265/2033/5595/1642/6776/3654/369/4790/148022/1388/3718/10454/572/3551/2002/5293/1869/4088/1026/8517/898/4772/5604/9641/6777/6773/5894/6300/1959/3725/7187/4318/4775/581/2885/1432
hsa04137	Mitophagy - animal	60	0.47826	1.86844	0.000146345	0.00162443	0.000991035	1866	tags=42%, list=14%, signal=36%	7942/8878/10370/11337/7157/79735/89941/6714/1460/5970/3265/598/7030/2309/79065/8408/1869/51024/6667/55626/6237/7879/65018/1459/7316
hsa05170	Human immunodeficiency virus 1 infection	185	0.362852	1.67326	0.000155428	0.0016696	0.0010186	2670	tags=35%, list=20%, signal=28%	2185/5605/2783/578/207/5829/4792/2787/920/3661/5880/6892/7124/2771/4615/3985/3107/7133/1072/208/5970/3135/3265/598/3106/8906/5595/811/1642/3654/2782/3105/5335/4790/2767/6199/10454/3133/572/162/3551/5293/8517/3134/4772/5604/7132/5894/5879/6300/8737/3725/5881/4775/1174/801/581/1399/1432/2353/9616/5058/51806/5062
hsa04625	C-type lectin receptor signaling pathway	96	0.427853	1.79726	0.000170555	0.00177483	0.0010828	2274	tags=38%, list=17%, signal=31%	4791/5580/207/4792/9261/7124/6714/5971/602/4046/208/5970/6850/3265/5595/29108/10379/4790/2207/30835/3551/5293/8517/64170/3659/4772/9641/6237/6773/5894/6300/1263/1959/3725/4775/801
hsa04071	Sphingolipid signaling pathway	108	0.412026	1.77074	0.000247616	0.00249867	0.0015244	2194	tags=35%, list=17%, signal=30%	5605/1509/207/7157/5880/29956/7124/2771/208/5970/3265/5518/5330/5595/4363/8698/8879/5528/4790/5338/10715/2207/56848/5293/55844/6609/5331/5604/5520/7132/5894/5526/5879/4985/6300/6610/8877/5881
hsa04919	Thyroid hormone signaling pathway	113	0.40636	1.7548	0.00037577	0.00362179	0.00220959	2072	tags=31%, list=16%, signal=26%	5605/7249/207/6256/489/7157/5211/9968/60/6257/6714/208/3265/2033/5330/5566/5595/6548/10025/488/1827/4855/5335/572/23439/5293/7067/5331/5604/4624/5894/5214/4851/54361/9862
hsa04910	Insulin signaling pathway	125	0.391587	1.70964	0.000380668	0.00362179	0.00220959	2827	tags=41%, list=21%, signal=32%	2319/5605/7249/207/6464/3101/10603/3636/208/23265/3265/10211/1978/9021/5566/5595/2997/5499/3098/5261/3632/92579/369/2889/6199/572/2872/23433/3551/2002/5293/2194/5604/5313/5894/8569/5106/3643/801/9322/5834/1399/5770/2885/53358/5575/51806/5836/6654/8651/673
hsa05160	Hepatitis C	143	0.371517	1.66341	0.000395415	0.00365759	0.00223144	3145	tags=41%, list=24%, signal=31%	5605/578/207/4792/7297/6256/7157/3661/10197/7124/7529/208/5970/7531/975/3665/3265/5518/9021/5595/10379/369/4790/148022/572/3551/5293/1869/55844/1026/8517/24146/5604/9641/5520/6773/7132/5894/8737/1364/949/5465/7187/1019/595/581/2885/7122/4940/6654/5516/673/4599/3949/6774/4939/2932/27102
hsa05207	Chemical carcinogenesis - receptor activation	168	0.358927	1.63901	0.000414403	0.00372962	0.00227538	2812	tags=33%, list=21%, signal=26%	5605/207/6256/896/6195/2778/2771/6257/6714/409/208/5970/2052/3265/1978/5566/5595/408/9314/6776/3840/9049/4790/1388/405/6199/572/2944/2946/5293/1869/2947/604/5604/9641/6777/2251/6196/5894/7422/54490/3725/5465/595/2948/115/2885/773/2353/112/8817/6654/107/10488/79852
hsa03050	Proteasome	41	-0.488957	-1.91405	0.000437391	0.00383293	0.00233841	2087	tags=54%, list=16%, signal=45%	5707/5713/5702/5718/5695/23198/5685/5686/5684/9861/5706/5689/5691/5701/5683/5688/3458/5710/5682/5692/5717/5700
hsa04926	Relaxin signaling pathway	115	0.393658	1.69768	0.000457466	0.00390606	0.00238302	3029	tags=42%, list=23%, signal=32%	5605/2783/207/7040/4792/6464/2787/2769/2778/2771/6714/409/208/5970/3265/5330/5566/5595/408/2782/4790/1388/5293/7423/5331/5604/5894/6300/7422/59/3725/4318/115/2885/4843/53358/1432/2353/3640/112/6654/107/10488/5600/10022/1277/113/2784
hsa04928	Parathyroid hormone synthesis, secretion and action	99	0.402931	1.70594	0.000648281	0.00539694	0.00329258	3267	tags=41%, list=25%, signal=31%	3727/6256/9826/9138/2778/2771/6257/409/4326/5330/5566/5595/408/4209/369/5338/1388/2767/64386/1026/9368/5331/6667/5604/5894/5141/4324/115/2353/1958/112/5745/107/10488/673/632/113/387/11214/109/5594
hsa00564	Glycerophospholipid metabolism	67	0.450712	1.78316	0.000712292	0.00567564	0.00346262	2687	tags=42%, list=20%, signal=33%	23646/8525/10908/11313/8681/56894/10554/10555/1606/5833/79143/10423/5338/1119/3931/9791/8527/79888/254531/1608/23659/1120/1609/64600/5130/81490/10400/51365
hsa04915	Estrogen signaling pathway	121	0.380923	1.65275	0.000715847	0.00567564	0.00346262	3305	tags=42%, list=25%, signal=32%	5605/5580/1509/207/6464/2288/2778/2771/6714/208/3265/5914/5330/5566/5595/3881/1388/5293/5331/6667/5604/3866/5894/3868/3310/2550/3725/4318/801/3763/3303/115/2885/53358/2353/112/192666/51806/3875/6654/107/10488/7031/3860/3857/2852/113/109/4313/5594/91860
hsa04218	Cellular senescence	140	0.364077	1.62125	0.000852693	0.00660341	0.00402864	2459	tags=34%, list=19%, signal=28%	5605/8878/7249/207/678/7040/55957/7157/9261/896/3107/208/5970/823/3135/3265/1978/3106/5595/2309/677/3105/5499/28996/4790/293/3133/5883/5293/1869/4088/1026/1874/898/3134/4772/5604/6237/5894/6300/59341/1019/4775/595/801/7416/1432/2113
hsa01522	Endocrine resistance	90	0.408708	1.70286	0.00102989	0.00779439	0.00475523	3267	tags=49%, list=25%, signal=37%	5605/207/6464/7157/2778/6714/208/3265/5566/5595/10498/4855/369/6199/572/5293/1869/1026/6667/5604/5894/4851/6300/3725/4318/1019/595/581/115/2885/53358/1432/2353/1565/112/6654/107/673/2852/5600/113/109/4313/5594
hsa05169	Epstein-Barr virus infection	190	0.335051	1.55477	0.00116563	0.00862566	0.00526237	2452	tags=32%, list=19%, signal=26%	5709/4791/578/3683/207/4792/7297/7431/4793/7157/3661/6892/896/7124/11047/4615/3107/5971/208/5970/3135/6850/3665/3106/811/79685/3654/960/10379/3105/4794/4790/864/3718/10454/3133/3551/5293/1869/1026/8517/4067/898/3383/3134/9641/6773/5879/6300/8737/5704/3725/7187/5714/1019/595/581/8819/9612/1432
hsa05206	MicroRNAs in cancer	149	0.35613	1.60576	0.00153973	0.0111463	0.00680018	3271	tags=36%, list=25%, signal=28%	5605/10014/578/6464/3678/7431/25/7157/3162/3265/2033/599/5595/6768/4363/960/4855/5335/4790/5598/994/3551/5293/1869/1026/898/5604/7148/5894/4082/1944/4851/7422/4318/595/1399/2885/27165/10297/1945/6624/6654/8651/672/2261/9759/1398/6774/1943/387/5292/5328/5594/10018
hsa01523	Antifolate resistance	28	0.54946	1.78703	0.00159902	0.0113292	0.00691176	1512	tags=36%, list=11%, signal=32%	7124/6472/5970/4363/2356/4790/6573/4524/3551/8517
hsa05223	Non-small cell lung cancer	70	0.419097	1.67472	0.00169168	0.011736	0.00715995	2381	tags=36%, list=18%, signal=29%	5605/578/207/6256/7157/6257/208/3265/5595/2309/6776/5335/369/3718/572/5293/1869/1026/5604/6777/5894/1019/595/581/2885
hsa04935	Growth hormone synthesis, secretion and action	110	0.376283	1.62467	0.00190303	0.0126742	0.00773233	3267	tags=44%, list=25%, signal=33%	5605/207/6464/3726/2778/2771/208/3265/2033/5330/9021/5566/5595/6776/5335/1388/2767/5293/5331/5604/6777/5894/2689/6300/2693/1399/115/2885/53358/1432/2353/112/6654/55811/107/8651/10488/2691/6751/5600/1398/113/6774/6755/779/2932/109/5594
hsa05200	Pathways in cancer	488	0.275951	1.39252	0.00187333	0.0126742	0.00773233	3271	tags=30%, list=25%, signal=23%	4791/5605/2783/578/207/1050/6778/1441/6688/3570/1487/7040/4792/6256/2787/25/7157/5880/896/9826/9138/2950/2778/2771/6257/5371/112398/23401/3162/208/5970/5900/3265/3566/2033/3728/5914/5330/3561/7709/598/5566/5595/6776/1855/2323/4855/9817/2782/1613/9170/5335/369/4790/5338/10235/818/2767/405/3718/6199/8321/572/2944/3551/2946/2002/5293/1436/1869/7423/4088/1026/8517/898/2947/1857/3596/5331/6667/5604/67…
hsa05418	Fluid shear stress and atherosclerosis	128	0.363242	1.58502	0.00210476	0.0134786	0.00822306	2657	tags=34%, list=20%, signal=27%	8878/207/9181/7157/5880/7124/2950/653361/60/6714/10365/3162/208/5970/6612/9817/4790/5598/25828/2944/3551/2946/5293/8517/2947/3383/7132/5879/6300/7422/59341/3725/5881/4318/2948/801/445/1003/1432/51588/2353/93/51806
hsa04210	Apoptosis	129	0.357207	1.56523	0.00206937	0.0134786	0.00822306	2192	tags=28%, list=17%, signal=24%	5605/578/1509/207/1616/4792/7157/6709/7124/60/208/5970/823/3265/598/5595/10376/7278/4790/1508/4000/84790/572/3551/5293/8517/5604/7132/5894/8722/27429/8737/51807/1676/1512/3725
hsa05212	Pancreatic cancer	75	0.409859	1.66115	0.00237895	0.014454	0.00881814	2331	tags=39%, list=18%, signal=32%	578/207/7040/7157/5880/208/5970/5900/598/5595/369/4790/5338/6199/572/3551/5293/1869/4088/1026/8517/5604/5894/5879/7422/5881/1019/595/581
hsa05164	Influenza A	159	0.346957	1.57301	0.00234406	0.014454	0.00881814	2638	tags=32%, list=20%, signal=26%	5605/578/207/4792/7297/11100/4793/3661/896/7124/60/4615/5371/208/5970/3665/2033/3337/9021/5595/29108/7706/10379/100529063/4790/148022/293/8106/3551/5293/79671/8517/3383/5604/9641/6773/7132/4261/5894/10482/9230/103/7187/1019/5646/581/7177/7416/56649/4940/64499
hsa04810	Regulation of actin cytoskeleton	206	0.321453	1.50539	0.00238729	0.014454	0.00881814	2952	tags=31%, list=22%, signal=25%	5605/81/3683/207/1729/5829/3689/4627/3678/4478/5216/5880/9138/23396/60/87/6714/10163/3985/3695/1072/208/3265/5595/2934/10093/6548/9170/5499/369/54961/3687/28964/5293/54434/79784/5604/6237/2251/7409/3071/5894/7410/5879/8394/10458/8936/5881/4636/26999/1399/10095/10297/5058/8817/5062/3645/6654/10094/3691/673/2261/2909/1398
hsa03008	Ribosome biogenesis in eukaryotes	56	-0.412725	-1.74026	0.00255231	0.0151771	0.00925933	1632	tags=50%, list=12%, signal=44%	1457/10799/56000/54433/23560/55226/10940/29102/10436/4931/5901/2091/10813/7514/55272/102157402/29889/55781/10557/55813/51068/10775/10199/10556/51077/55127/10885/55916
hsa04658	Th1 and Th2 cell differentiation	84	0.391216	1.61192	0.00280903	0.0162305	0.00990197	2777	tags=35%, list=21%, signal=27%	6778/4792/7297/4793/920/5970/3566/3561/5595/6776/5335/4794/4790/864/3718/3551/8517/3596/4772/6777/4851/9794/6300/3725/4775/1432/2353/916/3111
hsa04145	Phagosome	137	0.349032	1.54821	0.00282694	0.0162305	0.00990197	2283	tags=31%, list=17%, signal=26%	9146/10312/3689/3678/11151/537/10383/527/653361/60/3107/10381/203068/3135/10952/3106/4689/10376/9114/811/7278/3105/29927/30835/535/155066/84790/3133/7059/9296/3134/7879/3916/4353/1778/5879/5878/51807/5869/949/525/55176
hsa00051	Fructose and mannose metabolism	28	0.532514	1.73192	0.00303048	0.0165435	0.0100929	3715	tags=68%, list=28%, signal=49%	7167/3101/5211/226/3098/5207/5373/5214/29926/5372/5210/231/2762/6652/230/2203/80201/8789/55556
hsa05235	PD-L1 expression and PD-1 checkpoint pathway in cancer	80	0.390378	1.59369	0.00297955	0.0165435	0.0100929	2582	tags=40%, list=20%, signal=32%	5777/5605/207/4792/4793/920/4615/1460/208/5970/3265/5595/5335/4794/4790/148022/6199/10538/3551/5293/8517/4772/5604/5894/1459/5133/6300/3725/4775/1432/2353/4215
hsa04650	Natural killer cell mediated cytotoxicity	115	0.365238	1.57512	0.00301948	0.0165435	0.0100929	2725	tags=34%, list=21%, signal=27%	2185/5777/5605/3683/3689/6464/5880/7124/3107/6452/3135/6850/3265/3106/5595/3105/5335/369/2207/3133/5293/3383/4772/5604/7409/9437/5894/7410/3804/5879/7305/5881/2885/100507436/53358/5058/4277/6654/259197
hsa04660	T cell receptor signaling pathway	97	0.371276	1.56208	0.00321927	0.0172565	0.0105279	3267	tags=42%, list=25%, signal=32%	5777/5605/207/4792/4793/920/7124/208/5970/3265/5595/5335/4794/4790/3551/5293/8517/4772/5604/7409/5894/7410/5133/6300/1493/3725/1019/4775/2885/1432/2353/5058/5062/6654/916/5600/387/2932/3937/3932/5594
hsa04261	Adrenergic signaling in cardiomyocytes	134	0.347155	1.53568	0.00326475	0.0172565	0.0105279	3396	tags=39%, list=26%, signal=29%	207/489/7171/2778/2771/208/5518/5330/5566/5595/6548/488/5528/5499/782/1388/818/493/23439/55844/5331/5520/4624/5526/70/7139/7169/6300/7134/3784/816/23533/801/115/1432/112/51806/784/107/10488/5516/5600/113/779/6543/7170/4634/109/5594/91860/483/476
hsa04664	Fc epsilon RI signaling pathway	62	0.42744	1.67045	0.00344313	0.0173924	0.0106108	2452	tags=40%, list=19%, signal=33%	5605/207/5880/240/7124/8681/3635/208/6850/3265/5595/5335/2207/5293/4067/3596/5604/7409/5894/7410/5879/6300/5881/2885/1432
hsa04917	Prolactin signaling pathway	67	0.421523	1.66768	0.00344714	0.0173924	0.0106108	3128	tags=45%, list=24%, signal=34%	5605/207/6464/6714/208/5970/3265/9021/5595/2309/6776/4790/2592/5293/3659/5604/6777/5894/6300/595/8792/2885/53358/1432/2353/6654/8651/5600/6774/2932
hsa05100	Bacterial invasion of epithelial cells	64	0.412054	1.62132	0.00343656	0.0173924	0.0106108	2477	tags=36%, list=19%, signal=29%	391/5829/6464/3678/1212/60/6714/10163/1785/3611/3059/10093/63916/1211/79767/5293/9844/5879/8936/8218/1399/53358/10095
hsa05142	Chagas disease	97	0.368187	1.54909	0.00360448	0.0179148	0.0109295	2810	tags=37%, list=21%, signal=29%	207/7040/4792/2769/7124/2778/2771/4615/208/5970/5518/5330/5595/811/3654/4790/148022/2767/3551/5293/55844/8517/1636/5331/5520/7132/6348/6300/713/3725/4843/1432/2353/107/916/5516
hsa04659	Th17 cell differentiation	99	0.374819	1.58692	0.00384534	0.0188309	0.0114884	1643	tags=25%, list=12%, signal=22%	6778/3570/7040/9466/4792/7297/6256/4793/920/6257/5970/3566/5914/3561/5595/6776/5335/4794/4790/3718/3551/4088/8517/4772/6777
hsa04961	Endocrine and other factor-regulated calcium reabsorption	50	0.441699	1.65969	0.00468027	0.0225874	0.0137802	3817	tags=52%, list=29%, signal=37%	1212/161/2778/1785/1175/5330/5566/1211/1173/493/23439/5331/163/8218/115/112/5745/6543/3816/483/476/1759/2099/5582/492/3817
hsa00480	Glutathione metabolism	45	0.454029	1.6656	0.00503701	0.0239618	0.0146187	3303	tags=42%, list=25%, signal=32%	2539/2950/2937/2678/3418/5226/2944/6723/2946/2687/2947/2948/2936/2730/26873/2876/2879/9027/79094
hsa00531	Glycosaminoglycan degradation	19	0.58601	1.73998	0.00535097	0.0244823	0.0149363	2688	tags=53%, list=20%, signal=42%	3425/6448/3423/138050/4669/3073/10855/2588/2720/8372
hsa04730	Long-term depression	54	0.442414	1.69831	0.00531949	0.0244823	0.0149363	1812	tags=30%, list=14%, signal=26%	5605/2778/2771/8681/3265/5518/5330/5595/369/2767/4067/6261/5331/5604/5894/1392
hsa05214	Glioma	69	0.401061	1.5977	0.005367	0.0244823	0.0149363	2827	tags=39%, list=21%, signal=31%	5605/578/207/6464/8536/7157/208/3265/5595/5335/369/818/5293/1869/1026/5604/5894/816/1019/595/801/581/2885/53358/51806/6654/673
hsa05120	Epithelial cell signaling in Helicobacter pylori infection	65	0.413565	1.63211	0.00557792	0.0245594	0.0149833	2951	tags=42%, list=22%, signal=32%	10312/4792/537/1445/527/6714/5970/9114/5335/4790/3579/535/155066/3551/28964/9296/8517/4067/5879/6300/3725/525/1432/533/5058/2919/5600
hsa05219	Bladder cancer	41	0.454837	1.63083	0.00560516	0.0245594	0.0149833	3679	tags=59%, list=28%, signal=42%	5605/7157/1890/6714/3265/5595/1613/369/1869/1026/5604/5894/7422/4318/1019/595/7380/673/2261/4313/5594/1612/3576/11186
hsa04510	Focal adhesion	186	0.322982	1.49033	0.00560009	0.0245594	0.0149833	3128	tags=32%, list=24%, signal=25%	2316/81/7791/207/1729/5829/6464/3678/7094/5880/7408/896/23396/60/87/6714/3611/3695/1298/208/3265/5595/5499/2889/572/7059/2002/5293/7423/29780/5604/7409/10319/1292/7148/5894/7410/5879/8394/7422/3725/5881/595/4636/1399/2885/53358/5058/5062/6654/3691/673/7450/2909/2324/1398/1277/387/10398/2932
hsa05110	Vibrio cholerae infection	44	0.458747	1.67295	0.0061349	0.0261913	0.0159789	2773	tags=50%, list=21%, signal=40%	10312/537/527/60/2778/10952/5566/9114/10945/5335/29927/11014/535/155066/9296/9601/3784/525/55176/115/533/375
hsa04012	ErbB signaling pathway	79	0.390145	1.59272	0.00610964	0.0261913	0.0159789	2952	tags=39%, list=22%, signal=31%	5605/207/6464/25/6714/208/3265/1978/5595/6776/5335/369/818/6199/572/2002/5293/1026/5604/6777/5894/816/3725/1399/2885/53358/5058/5062/6654/673/1398
hsa04024	cAMP signaling pathway	197	0.307777	1.43682	0.00657651	0.0277212	0.0169123	3396	tags=38%, list=26%, signal=29%	5605/207/4792/489/5880/2778/2771/208/5970/2033/5566/5595/6548/488/5499/4790/5338/818/493/572/23439/2906/5293/2867/4772/5604/6237/5348/7409/5894/7410/1392/2550/5879/8310/2902/5141/4881/816/3725/5465/5881/2693/801/115/2353/5732/112/5058/51806/55811/107/10488/2904/673/1907/6751/5020/113/2737/6755/1813/1258/5727/779/387/10398/134/610/109/5594/91860/627/483/476
hsa05034	Alcoholism	89	0.362396	1.51199	0.00681083	0.0283501	0.0172959	3306	tags=45%, list=25%, signal=34%	10014/2783/6464/2787/2778/2771/3265/5566/5595/2782/5499/2030/2354/369/1388/2906/10013/5604/3177/5894/1392/10645/51564/2902/801/2885/53358/8841/51806/6654/10488/2904/673/9759/2784/1813/79885/5594/91860/627
hsa04520	Adherens junction	64	0.397206	1.5629	0.00702123	0.0285117	0.0173946	2357	tags=31%, list=18%, signal=26%	5777/81/5880/60/87/6714/10163/1460/2033/7454/5595/4088/1459/1500/5879/10458/8936/5881/3643/5770
hsa04621	NOD-like receptor signaling pathway	150	0.332588	1.50353	0.00719215	0.0285117	0.0173946	1766	tags=25%, list=13%, signal=22%	5580/63940/4792/7297/5585/4793/11337/51393/3661/7124/4615/9051/5970/22861/7226/7531/3665/5330/598/5595/29108/10379/4790/1508/148022/7205/25828/10454/3551/79671/79792/8517/64170/5331/5027/9641/6773/10616
hsa04141	Protein processing in endoplasmic reticulum	142	0.336125	1.50234	0.00697841	0.0285117	0.0173946	2346	tags=29%, list=18%, signal=24%	5034/578/23645/5589/10956/10273/51035/23193/11253/10970/823/10961/10952/3337/5886/6238/7841/811/6396/9632/7322/29927/64215/64374/1388/55666/55741/10525/29978/23640/6048/10113/3310/26232/9601/79748/7415/3300/55176/581/3303
hsa04014	Ras signaling pathway	203	0.303131	1.417	0.00711452	0.0285117	0.0173946	3105	tags=33%, list=23%, signal=25%	5605/2783/207/6464/2787/25/5880/8681/208/5970/5900/3265/598/5566/5595/2323/2782/5335/4790/5338/10235/572/3551/3363/2002/5293/1436/7423/9610/5863/22821/8517/5604/6237/2251/5894/1944/5879/7422/1969/2902/5878/5869/5881/64600/3643/801/2885/53358/2113/5058/51806/8817/1945/5062/51365/6654/2904/285/2261/3481/2324/5319/2784/1943/387
hsa04721	Synaptic vesicle cycle	66	0.402263	1.58106	0.00747842	0.0292978	0.0178741	2897	tags=38%, list=22%, signal=30%	6844/10312/8775/1212/161/527/1785/1175/9114/1211/1173/535/155066/9296/163/6507/5864/8218/525/6572/773/533/6534/10814/10497
hsa04929	GnRH secretion	59	0.41684	1.62532	0.00802409	0.030784	0.0187808	3267	tags=39%, list=25%, signal=29%	5605/207/409/208/3265/5330/5595/408/2767/2797/5293/5331/5604/5894/2550/3763/8913/2852/8912/779/610/3783/5594
hsa04540	Gap junction	81	0.381564	1.56447	0.00804266	0.030784	0.0187808	3267	tags=41%, list=25%, signal=31%	5605/10383/2778/2771/6714/10381/203068/3265/5330/5566/5595/10376/7278/5598/2767/84790/5331/5604/1453/5894/51807/115/2885/112/6654/107/113/1813/347733/10382/79861/109/5594
hsa04970	Salivary secretion	77	0.389427	1.58887	0.00857177	0.0319747	0.0195072	3396	tags=38%, list=26%, signal=28%	6522/6844/1471/2778/5330/5566/6548/5542/493/1472/23439/5331/4069/1473/1470/5554/801/115/112/51806/107/727897/113/820/3783/109/91860/483/476
hsa05162	Measles	130	0.335381	1.47345	0.0086418	0.0319747	0.0195072	2346	tags=30%, list=18%, signal=25%	578/207/4792/7297/4478/4793/7157/3661/896/4615/1460/208/5970/3665/3561/598/6776/3654/10379/4790/30835/3718/572/3551/5293/8517/898/9641/6777/6773/1459/3310/103/3725/7187/1019/595/581/3303
hsa04151	PI3K-Akt signaling pathway	321	0.277216	1.35138	0.00847126	0.0319747	0.0195072	1998	tags=20%, list=15%, signal=17%	5605/2783/7249/207/1441/3570/3678/6256/5585/2787/7157/896/7529/3695/1298/208/5970/7531/6850/3265/3566/1978/5518/3561/598/5595/2309/3164/11140/2323/5528/2997/2782/9170/92579/4790/1388/3718/6199/572/7059/3551/5293/1436/55844/7423/1026/8517/898/5604/2251/5520/10319/1292/7148/6794/5894/5008/5526/1944/5879/2689/7422/1969
hsa05211	Renal cell carcinoma	65	0.398863	1.57409	0.00893462	0.0326948	0.0199466	2952	tags=45%, list=22%, signal=35%	5605/207/7040/112398/5546/208/3265/2033/5595/7030/369/2889/405/572/5293/1026/5604/5894/5879/7422/3725/1399/2885/2113/5058/5062/6654/673/1398
hsa05417	Lipid and atherosclerosis	196	0.305338	1.42655	0.00925604	0.0335028	0.0204395	2346	tags=27%, list=18%, signal=23%	207/4792/6256/7157/3661/7124/9138/653361/4615/6257/6714/208/5970/3665/3265/5330/598/177/5595/4689/29108/3654/5335/4790/148022/818/5452/10454/572/5451/3551/5293/8517/4067/3383/5331/4772/9641/7409/7132/6348/3310/7410/5879/6300/816/3725/7187/4318/4775/801/581/3303
hsa05230	Central carbon metabolism in cancer	66	0.394548	1.55074	0.00979727	0.0350806	0.0214021	1801	tags=27%, list=14%, signal=24%	5605/2539/6510/207/3101/7157/5315/5211/208/3418/3265/5595/9997/3098/5293/5604/5894/5214
hsa04330	Notch signaling pathway	49	0.417126	1.55986	0.0102893	0.0360669	0.0220038	2091	tags=31%, list=16%, signal=26%	1487/113878/5986/4242/2033/23385/1855/7090/4855/51107/1857/4851/1488/9794/171558
hsa04612	Antigen processing and presentation	70	0.377418	1.50817	0.0102222	0.0360669	0.0220038	1832	tags=26%, list=14%, signal=22%	920/4802/6892/10197/7124/3107/3135/3106/811/3105/8625/1508/972/3133/3134/4261/3310/3804
hsa00561	Glycerolipid metabolism	42	0.446264	1.60438	0.0104731	0.0363286	0.0221635	2308	tags=33%, list=17%, signal=28%	8525/56894/223/57104/10554/10555/1606/8694/217/8527/1608/1609/219/231
hsa04920	Adipocytokine signaling pathway	65	0.393121	1.55143	0.0115524	0.0387658	0.0236504	2385	tags=34%, list=18%, signal=28%	207/4792/6256/4793/7124/6257/7133/208/5970/9021/92579/4794/4790/3551/51094/8517/7132/6794/10645/5465/5106/181
hsa04623	Cytosolic DNA-sensing pathway	53	0.406106	1.5488	0.0116414	0.0387658	0.0236504	2034	tags=32%, list=15%, signal=27%	4792/5434/4793/3661/5441/5970/3665/29108/4790/3551/8517/1777/9641/661/51728/103/8737
hsa04925	Aldosterone synthesis and secretion	85	0.355902	1.46972	0.0113474	0.0387658	0.0236504	3396	tags=36%, list=26%, signal=27%	25865/8536/2778/5330/5566/3164/1388/818/493/2767/23439/5331/747/4881/949/816/801/8913/115/112/51806/107/10488/8912/3949/113/779/109/91860/483/476
hsa03040	Spliceosome	105	-0.306304	-1.46223	0.0115078	0.0387658	0.0236504	2637	tags=39%, list=20%, signal=32%	9939/7307/1655/6434/10286/9410/6633/10929/6627/57187/6629/55660/51340/51362/8559/11157/10915/4116/51691/27258/6634/25949/11325/10772/3183/6426/55696/6432/23350/22938/9879/220988/9984/6430/988/10465/1665/23451/22916/3178/6428
hsa05416	Viral myocarditis	55	0.412829	1.58795	0.0129536	0.0405309	0.0247272	2238	tags=31%, list=17%, signal=26%	3683/3689/1981/25/5880/60/3107/3135/3106/3105/3133/3383/3134/4624/5879/5881/595
hsa03250	Viral life cycle - HIV-1	57	0.408174	1.5868	0.0129447	0.0405309	0.0247272	1871	tags=30%, list=14%, signal=26%	25920/9146/79643/55201/920/27183/8178/6829/2033/5300/1025/6598/79869/23299/5045/51497/4298
hsa05216	Thyroid cancer	36	0.45241	1.55536	0.0126725	0.0405309	0.0247272	3267	tags=42%, list=25%, signal=31%	5605/578/6256/7157/6257/3265/5595/1026/5604/595/581/673/4616/7170/5594
hsa04070	Phosphatidylinositol signaling system	83	0.366612	1.50504	0.0127444	0.0405309	0.0247272	2338	tags=34%, list=18%, signal=28%	8525/5298/9807/23396/3635/3636/5330/3705/1606/8897/10423/5297/5335/3632/3707/3613/55361/5293/8527/5331/1608/1609/8394/3706/3631/9110/801/64419
hsa04270	Vascular smooth muscle contraction	114	0.34062	1.47002	0.0130234	0.0405309	0.0247272	3305	tags=36%, list=25%, signal=27%	5605/5580/4627/9826/9138/2778/5739/8681/5330/5566/5595/5499/369/2767/79784/5331/5604/10267/5894/4881/59/72/64600/801/115/79924/112/51806/107/673/4880/1907/3779/5319/113/779/387/10398/109/5594/91860
hsa05152	Tuberculosis	164	0.310812	1.41832	0.0130226	0.0405309	0.0247272	2452	tags=29%, list=19%, signal=24%	1509/207/10312/7040/3689/11151/4802/537/7124/527/4615/6714/4046/208/5970/6850/2033/5595/9114/1051/3654/8625/4790/818/2207/30835/972/535/572/3687/56848/64170/7879/3916/7132/4261/5894/6300/5878/8877/5869/1263/816/801/581/1054/4843/1432
hsa05020	Prion disease	218	-0.246373	-1.29478	0.0124242	0.0405309	0.0247272	2226	tags=28%, list=17%, signal=23%	9167/5601/4695/5707/5713/7417/6390/8503/5702/1350/5718/1536/6263/5695/5685/730/5686/4697/836/5295/1340/858/5684/4698/5290/9861/3799/5706/54205/1329/5689/4701/5691/5701/4685/1386/4720/5683/4700/29796/1345/5688/1965/4726/5291/1385/5710/5621/6392/7381/5682/4702/5692/1347/5717/7385/7419/5567/5700/4711
hsa03013	Nucleocytoplasmic transport	92	-0.316461	-1.46092	0.0141173	0.0434215	0.0264908	3132	tags=46%, list=24%, signal=35%	3839/23534/56000/22794/10762/7175/9972/348995/65109/9939/55161/3838/3841/81929/25909/3843/3842/57187/5901/23039/4927/5411/23279/5903/7514/387082/79023/26019/4116/10527/55746/57122/51068/8480/1434/7341/53371/9984/1915/22916/55916/10284
hsa05012	Parkinson disease	204	-0.250359	-1.29602	0.014213	0.0434215	0.0264908	3022	tags=36%, list=23%, signal=28%	4725/10213/5705/1812/1337/4724/4694/4129/2861/83447/5708/4780/2770/4722/7326/25800/6647/9167/5601/4695/7494/5707/5713/7417/10131/6390/5702/1350/5718/6263/5695/4891/5685/5686/4697/836/1340/5684/4698/9861/3799/5706/54205/7314/1329/5689/4701/5691/5701/55669/4720/5683/2773/4700/29796/1345/5688/1965/4726/5710/6392/7381/5682/4702/5692/1347/5717/7385/11315/7419/5567/5700/4711
hsa04066	HIF-1 signaling pathway	103	0.33618	1.43132	0.0143685	0.0434974	0.026537	1981	tags=27%, list=15%, signal=23%	4055/5605/207/3570/3101/5211/112398/226/3162/208/5970/2033/1978/5595/7076/3098/5335/4790/818/405/6199/2872/5293/1026/5604/5214/8569/7422
hsa05213	Endometrial cancer	56	0.409855	1.58121	0.0148208	0.0443364	0.0270489	3267	tags=46%, list=25%, signal=35%	5605/578/207/7157/3611/208/3265/5595/2309/369/572/2002/5293/1026/5604/5894/595/581/2885/8312/10297/6654/673/4616/2932/5594
hsa05017	Spinocerebellar ataxia	131	-0.283998	-1.40688	0.0149119	0.0443364	0.0270489	2111	tags=31%, list=16%, signal=27%	5601/7494/5707/5713/7417/8503/92552/5702/5718/5695/5685/5686/3516/5295/1600/9821/25814/5684/5290/23369/6095/9861/5706/54205/9519/5689/5691/5701/30849/5683/5688/4976/5291/5710/4287/2959/5682/5692/5717/7419/5700
hsa05205	Proteoglycans in cancer	189	0.299837	1.38843	0.0151389	0.0446127	0.0272175	2238	tags=24%, list=17%, signal=21%	2316/5777/5605/207/5829/7040/3678/4478/7157/7124/9138/60/6714/208/3059/3265/5566/5595/6548/960/5499/5335/369/818/6199/8321/2002/5293/1026/967/5604/6237/7409/2535/5894/7410/5879/6469/6300/7422/54361/10855/816/4318/5329/595
hsa00010	Glycolysis / Gluconeogenesis	58	0.400035	1.55874	0.0154176	0.0448286	0.0273492	3555	tags=43%, list=27%, signal=32%	7167/3101/221/5315/2821/5211/223/226/217/3098/92579/5313/5214/5106/219/5223/230/2203/92483/5160/2645/80201/3948/2023/8789
hsa04620	Toll-like receptor signaling pathway	94	0.34571	1.45291	0.015616	0.0448286	0.0273492	2198	tags=29%, list=17%, signal=24%	5605/207/4792/3661/7124/4615/208/5970/3665/5595/54472/3654/3663/4790/148022/10454/3551/5293/8517/5604/9641/6348/5879/6300/8737/3725/7187
hsa05226	Gastric cancer	135	0.311398	1.38164	0.0155885	0.0448286	0.0273492	2707	tags=29%, list=20%, signal=23%	5605/578/207/7040/6464/6256/7157/6257/23401/208/3265/3728/5595/1855/369/6199/8321/5293/1869/4088/1026/898/1857/5604/2251/2535/5894/6469/54361/595/581/2885/53358/8312/7015/10297/8817/1030/6654
hsa04933	AGE-RAGE signaling pathway in diabetic complications	97	0.340624	1.43312	0.0161167	0.0458707	0.027985	2575	tags=31%, list=19%, signal=25%	5580/207/1729/7040/7124/208/5970/3265/5330/177/5595/6776/5335/4790/5293/7423/4088/3383/5331/4772/6777/5879/6300/7422/3725/1019/595/581/1432/1958
hsa05133	Pertussis	67	0.38136	1.50878	0.0164568	0.0464418	0.0283334	3305	tags=42%, list=25%, signal=32%	3689/3678/3661/7124/2771/4615/1072/5970/5595/29108/3654/4790/148022/3659/710/6300/713/3725/801/4843/1432/2353/51806/5600/929/387/5594/91860
hsa04670	Leukocyte transendothelial migration	100	0.350696	1.49002	0.0170949	0.0474383	0.0289413	2511	tags=30%, list=19%, signal=24%	2185/81/3683/6494/5829/3689/4478/5880/7408/653361/60/2771/87/4267/4689/5335/5293/3383/24146/7409/7410/1500/5879/6300/1364/4318/4636/1003/1432/7122
hsa00190	Oxidative phosphorylation	90	-0.310878	-1.4262	0.0170438	0.0474383	0.0289413	2874	tags=39%, list=22%, signal=31%	1337/4724/4694/8992/51382/4722/23545/9167/10063/50617/4695/529/6390/5464/1350/4697/1340/4698/54205/27068/1329/4701/528/4720/4700/29796/1345/4726/6392/1353/7381/4702/1347/7385/4711
hsa04916	Melanogenesis	87	0.340128	1.40956	0.0179046	0.0492745	0.0300616	3305	tags=36%, list=25%, signal=27%	5605/2778/2771/3265/2033/5330/5566/5595/1855/818/8321/1857/5331/5604/2535/5894/54361/816/801/115/112/51806/107/4286/10488/113/2932/7299/109/5594/91860

## Sheet: SFSWAP_GO
ONTOLOGY	ID	Description	setSize	enrichmentScore	NES	pvalue	p.adjust	qvalue	rank	leading_edge	core_enrichment
CC	GO:0022626	cytosolic ribosome	89	-0.606048	-3.01537	1e-10	9.595e-08	8.55263e-08	1901	tags=54%, list=14%, signal=46%	140801/6232/6217/6208/6181/6144/6201/11224/6125/6223/6202/6227/6138/6135/6189/54505/6193/6187/116832/6210/6129/6191/6137/6142/6146/6155/51121/6205/9349/6228/6170/6188/6235/6166/6229/6165/6233/6128/6133/6164/6152/6160/6167/51065/6157/6169/9045/6230
MF	GO:0003735	structural constituent of ribosome	131	-0.555855	-2.96208	1e-10	9.595e-08	8.55263e-08	1901	tags=48%, list=14%, signal=42%	140801/51318/6232/6217/6208/28977/6181/6144/55052/7818/6201/11224/6125/6223/6202/6227/10884/122704/6138/6135/78988/6189/6193/10240/6187/116832/65080/9553/6210/55133/6129/6191/28998/29074/6137/6142/6146/6155/51121/6205/9349/6228/6170/6188/9801/6235/6166/6229/6165/6233/11222/6128/6133/6164/6152/6160/6167/51065/6157/6169/51187/9045/6230
BP	GO:0002181	cytoplasmic translation	136	-0.544701	-2.89295	1e-10	9.595e-08	8.55263e-08	1845	tags=50%, list=14%, signal=43%	6232/1974/6217/6208/3184/1660/3646/2332/7812/6181/6144/1968/6201/11224/6125/6223/6202/6227/6138/6135/6189/54505/6193/6187/120526/9147/28985/6210/6129/6191/10605/6451/6137/10492/6142/6146/6155/8669/51121/6205/9349/3192/51611/51441/6228/6170/6188/55854/6235/1975/4690/7555/6229/6165/6233/22849/6128/6133/6164/6152/6160/6167/10480/8562/6157/6169/9045/6230
CC	GO:0044391	ribosomal subunit	144	-0.515291	-2.75731	1e-10	9.595e-08	8.55263e-08	1901	tags=47%, list=14%, signal=40%	140801/54148/51318/6232/6217/6208/28977/6181/6144/55052/7818/6201/28957/11224/6125/6223/6202/6227/10884/122704/6138/6135/78988/6189/54505/6193/10240/6187/116832/65080/9553/6210/6129/6191/28998/63899/29074/6137/6142/6146/6155/51121/6205/23107/9349/6228/6170/6188/9801/6235/6166/6229/6165/6233/4869/11222/6128/6133/6164/6152/6160/6167/51065/6157/6169/9045/6230
CC	GO:0005840	ribosome	165	-0.493161	-2.72652	1e-10	9.595e-08	8.55263e-08	1901	tags=44%, list=14%, signal=38%	140801/54148/51318/6232/6217/6208/1660/689/28977/6181/6144/55052/7818/6201/28957/11224/6125/6223/6202/6227/10884/122704/6138/6135/78988/6189/54505/6193/10240/6187/116832/65080/9553/6210/6129/6191/28998/63899/29074/6137/6142/6146/6155/51121/6205/23107/9349/27230/6228/6170/6188/9801/6235/6166/4690/6229/6165/6233/4869/11222/6128/6133/8939/6164/6152/6160/6167/51065/6157/6169/51187/9045/6230
BP	GO:0042254	ribosome biogenesis	235	-0.370287	-2.1108	1e-10	9.595e-08	8.55263e-08	1845	tags=32%, list=14%, signal=28%	6232/6217/25983/51388/10775/10885/6208/10969/2091/8450/64216/10412/55052/55299/57050/6201/1736/11224/11137/6125/9816/6223/6202/54433/6227/79979/6135/54505/27292/6193/25926/51001/65080/11340/55661/51018/10813/6129/63899/404672/5591/6155/55781/51121/11157/23160/51096/5901/55127/2752/8451/2483/29081/55319/8886/51441/54700/6229/55003/6165/4869/6128/6059/23560/6152/29889/51065/11103/51068/10438/51077/…
BP	GO:0022613	ribonucleoprotein complex biogenesis	357	-0.330265	-1.95548	1e-10	9.595e-08	8.55263e-08	1845	tags=31%, list=14%, signal=28%	6232/192670/6217/6732/25983/51388/10775/10885/6208/1660/3326/10969/2091/8450/11051/3646/6634/64216/10412/55052/10978/55299/1968/57050/1207/6201/1736/51340/11224/10772/11137/96764/6125/9816/6223/6202/10659/54433/6227/9879/79979/11168/6135/54505/27292/27336/6193/25926/8487/51001/65080/11340/28985/55661/51018/10813/11171/6129/8161/63899/404672/23405/5591/6155/8669/55781/51121/10713/11157/23160/51096…
BP	GO:0006412	translation	490	-0.309487	-1.92571	1e-10	9.595e-08	8.55263e-08	1924	tags=30%, list=15%, signal=27%	351/140801/54148/1979/51318/6232/192670/1974/6217/25983/6208/3184/1660/26610/1933/10289/167227/57472/1917/3646/23112/5436/55024/2332/7812/79048/28977/6181/6144/55052/55699/1968/113251/7818/6201/28957/11224/6125/6223/6202/6227/1936/10884/7965/122704/6138/6135/78988/23708/6189/54505/9470/6193/51067/9939/10240/85476/6187/116832/120526/65080/11340/9147/9553/10102/28985/9728/6210/55133/6129/6191/28998…
BP	GO:0042773	ATP synthesis coupled electron transport	73	-0.555298	-2.62661	1.59531e-10	1.22456e-07	1.09153e-07	2279	tags=52%, list=17%, signal=43%	4717/4726/1355/29103/6391/7386/1337/4702/4713/29796/6390/4712/4711/4724/4725/4709/1345/1738/4707/54205/6622/4718/4700/4710/7385/4694/27069/1348/6392/9167/7381/1329/1347/7388/4698/4697/1349/11315
BP	GO:0042775	mitochondrial ATP synthesis coupled electron transport	73	-0.555298	-2.62661	1.59531e-10	1.22456e-07	1.09153e-07	2279	tags=52%, list=17%, signal=43%	4717/4726/1355/29103/6391/7386/1337/4702/4713/29796/6390/4712/4711/4724/4725/4709/1345/1738/4707/54205/6622/4718/4700/4710/7385/4694/27069/1348/6392/9167/7381/1329/1347/7388/4698/4697/1349/11315
BP	GO:0019646	aerobic electron transport chain	67	-0.567621	-2.63289	2.64462e-10	1.84546e-07	1.64498e-07	2279	tags=55%, list=17%, signal=46%	4717/4726/1355/29103/6391/7386/1337/4702/4713/29796/6390/4712/4711/4724/4725/4709/1345/1738/4707/54205/6622/4718/4700/4710/7385/4694/1348/6392/9167/7381/1329/1347/7388/4698/4697/1349/11315
CC	GO:0015934	large ribosomal subunit	87	-0.5046	-2.48931	8.64611e-10	5.53063e-07	4.9298e-07	1542	tags=48%, list=12%, signal=43%	140801/54148/51318/28977/6181/6144/55052/11224/6125/10884/122704/6138/6135/78988/116832/65080/9553/6129/28998/63899/29074/6137/6142/6146/6155/51121/9349/6170/9801/6166/6165/4869/11222/6128/6133/6164/6152/6160/6167/6157/6169/9045
BP	GO:0022904	respiratory electron transport chain	87	-0.48811	-2.40796	3.72709e-09	2.2007e-06	1.96163e-06	2281	tags=46%, list=17%, signal=38%	2110/4717/4726/1355/29103/6391/7386/1337/4702/4713/29796/6390/4712/4711/4724/4725/4709/1345/1738/4707/54205/6622/4718/4700/4710/7385/4694/27069/1348/6392/2108/9167/7381/1329/1347/7388/4698/4697/1349/11315
BP	GO:0006119	oxidative phosphorylation	92	-0.481441	-2.41159	7.22489e-09	3.96131e-06	3.53096e-06	2304	tags=46%, list=17%, signal=38%	26471/4717/4726/1355/29103/6391/7386/205/538/1337/4702/4713/29796/6390/4712/4711/4724/4725/4709/1345/1738/4707/54205/6622/4718/4700/4710/7385/4694/27069/1348/6392/9167/79736/7381/1329/1347/7388/4698/4697/1349/11315
CC	GO:0015935	small ribosomal subunit	61	-0.555945	-2.57402	8.28875e-09	4.24163e-06	3.78083e-06	2551	tags=52%, list=19%, signal=43%	55173/28973/60488/51650/51373/6232/6217/6208/28977/7818/6201/28957/6223/6202/6227/6189/54505/6193/10240/6187/6210/6191/6205/23107/6228/6188/6235/6229/6233/4869/51065/6230
CC	GO:0022627	cytosolic small ribosomal subunit	38	-0.653087	-2.67656	1.5348e-08	7.36319e-06	6.56327e-06	1845	tags=55%, list=14%, signal=48%	6232/6217/6208/6201/6223/6202/6227/6189/54505/6193/6187/6210/6191/6205/6228/6188/6235/6229/6233/51065/6230
CC	GO:0022625	cytosolic large ribosomal subunit	51	-0.590694	-2.61521	2.545e-08	1.14914e-05	1.0243e-05	1520	tags=51%, list=11%, signal=45%	6181/6144/11224/6125/6138/6135/116832/6129/6137/6142/6146/6155/51121/9349/6170/6166/6165/6128/6133/6164/6152/6160/6167/6157/6169/9045
CC	GO:0098798	mitochondrial protein-containing complex	188	-0.352825	-1.9745	3.40526e-08	1.45215e-05	1.2944e-05	2591	tags=41%, list=20%, signal=34%	29088/51660/55173/3313/28973/60488/56922/4717/4726/64976/29103/6391/7386/51650/3419/51373/1337/54148/51318/4702/4713/29796/8050/6390/80273/28977/55052/4712/25813/7818/28957/4711/139322/10884/4724/122704/4725/78988/9804/10240/65080/9553/3032/55750/28998/63899/8801/4709/29074/1345/1738/4707/23107/100287932/5162/4718/4700/4710/7385/4694/1348/9512/10440/25874/221154/10845/9801/6392/54927/9167/7381/11…
CC	GO:0070469	respirasome	69	-0.496678	-2.30923	1.67554e-07	6.76919e-05	6.03381e-05	2279	tags=51%, list=17%, signal=42%	4717/4726/1355/6391/7386/1337/4702/4713/29796/6390/4712/4711/4724/4725/4709/1345/23530/4707/54205/4718/4700/4710/7385/4694/1348/6392/9167/7381/1329/1347/7388/4698/4697/25994/1349
CC	GO:0005746	mitochondrial respirasome	65	-0.494601	-2.29313	2.62592e-07	0.000100783	8.9834e-05	2279	tags=51%, list=17%, signal=42%	4717/4726/1355/6391/7386/1337/4702/4713/29796/6390/4712/4711/4724/4725/4709/1345/23530/4707/4718/4700/4710/7385/4694/1348/6392/9167/7381/1329/1347/7388/4698/4697/1349
MF	GO:0004672	protein kinase activity	457	0.351461	1.62957	3.204e-07	0.000117114	0.000104391	3861	tags=40%, list=29%, signal=30%	23476/818/6046/1196/2580/2011/3654/4296/4215/9020/5894/7297/57787/1453/1455/23387/7204/23031/10922/728642/5598/50488/5315/8408/65018/2931/9024/10295/5127/1436/10641/3611/8550/3551/1026/11184/2872/1445/25865/790/5256/8986/3718/5260/7016/551/9344/369/5261/5605/1198/2242/5580/1460/5616/2022/1018/6195/4342/1459/2185/22983/23552/816/640/10494/5579/375449/23617/780/9149/8569/2268/5566/25778/4261/1612/3…
MF	GO:0019003	GDP binding	60	-0.516527	-2.39904	3.80072e-07	0.000132611	0.000118204	2303	tags=45%, list=17%, signal=37%	9367/382/2770/8934/64121/2773/5867/57826/5908/373/5873/403/51143/5901/54471/6009/6729/5899/5898/4893/5634/5906/3845/5868/9364/5912/5862
BP	GO:0022900	electron transport chain	134	-0.375373	-1.97502	7.73233e-07	0.000258058	0.000230024	2281	tags=37%, list=17%, signal=31%	79689/2110/4717/4726/1355/29103/6391/7386/5860/1337/4702/4713/29796/6390/1528/4712/6715/4711/4724/4725/4709/1345/1738/4707/54205/51022/6622/1353/4718/4700/4710/7385/4694/27069/1348/4129/6392/2108/9167/7381/1329/1347/7388/8560/4698/128/4697/1349/11315
CC	GO:0098803	respiratory chain complex	62	-0.497923	-2.29762	8.13626e-07	0.000260225	0.000231955	2279	tags=50%, list=17%, signal=42%	4717/4726/6391/7386/1337/4702/4713/29796/6390/4712/4711/4724/4725/4709/1345/4707/4718/4700/4710/7385/4694/1348/6392/9167/7381/1329/1347/7388/4698/4697/1349
BP	GO:0006120	mitochondrial electron transport, NADH to ubiquinone	38	-0.589019	-2.41398	1.24047e-06	0.000366285	0.000326493	2279	tags=53%, list=17%, signal=44%	4717/4726/29103/4702/4713/4712/4711/4724/4725/4709/1738/4707/6622/4718/4700/4710/4694/4698/4697/11315
CC	GO:0098800	inner mitochondrial membrane protein complex	91	-0.422271	-2.10274	1.24067e-06	0.000366285	0.000326493	2279	tags=45%, list=17%, signal=38%	4717/4726/29103/6391/7386/1337/4702/4713/29796/6390/80273/4712/25813/4711/139322/4724/4725/55750/4709/1345/4707/100287932/4718/4700/4710/7385/4694/1348/10440/25874/221154/6392/54927/9167/7381/1329/1347/7388/4698/4697/1349
MF	GO:0008137	NADH dehydrogenase (ubiquinone) activity	29	-0.64893	-2.49801	1.48416e-06	0.000421941	0.000376103	2279	tags=55%, list=17%, signal=46%	4717/4726/4702/4713/4712/4711/4724/4725/4709/4707/4718/4700/4710/4694/4698/4697
MF	GO:0004674	protein serine/threonine kinase activity	340	0.358614	1.63801	1.79429e-06	0.000491892	0.000438455	2824	tags=33%, list=21%, signal=27%	23476/818/6046/1196/2580/2011/3654/4296/4215/9020/5894/57787/1453/1455/23387/7204/23031/10922/728642/5598/50488/8408/65018/2931/9024/10295/5127/3611/8550/3551/11184/2872/25865/5256/8986/5260/7016/9344/369/5261/5605/1198/5580/1460/5616/2022/1018/6195/4342/1459/2185/22983/23552/816/10494/5579/375449/23617/9149/8569/5566/25778/4261/1612/3984/9641/6793/208/8737/54101/8536/10188/207/1020/5681/1956/559…
BP	GO:0009060	aerobic respiration	134	-0.364162	-1.91604	2.25276e-06	0.000596282	0.000531504	2304	tags=39%, list=17%, signal=32%	26471/4717/4726/1355/29103/6391/7386/2271/205/3419/538/1337/4702/4713/29796/3091/6390/4712/4711/4724/4725/3417/9650/8801/4709/1345/23530/1738/4707/54205/6622/5162/8803/4718/4700/4710/7385/4694/27069/1348/3658/6392/9167/79736/7381/1329/1347/7388/4698/4697/1349/11315
BP	GO:0006364	rRNA processing	173	-0.338618	-1.86816	2.441e-06	0.000604423	0.00053876	1845	tags=31%, list=14%, signal=27%	6232/6217/25983/10775/10885/6208/10969/2091/64216/10412/55299/57050/6201/1736/11224/11137/6125/6223/6202/54433/6227/79979/6135/27292/25926/65080/11340/55661/51018/10813/6129/63899/404672/5591/6155/55781/11157/23160/51096/55127/2483/29081/8886/51441/6229/6165/23560/11103/10438/51077/80135/9045/6230
BP	GO:0010975	regulation of neuron projection development	365	0.354592	1.62724	2.41143e-06	0.000604423	0.00053876	4269	tags=41%, list=32%, signal=29%	818/2580/2011/64689/9139/23654/10498/23129/64218/1072/8408/2931/9024/2896/25793/23258/8175/2664/393/5605/54915/2033/56965/2242/5526/10300/1523/9037/7431/2185/816/10494/1600/23373/7248/9820/11202/23316/23105/3792/22902/29882/386724/6585/3984/9314/8482/9638/8536/10519/207/1020/1002/4803/50674/1000/1942/4914/3675/3280/57187/6324/57118/2316/5780/57556/10507/23028/2889/1268/2048/57154/8321/7070/5789/1…
BP	GO:0016072	rRNA metabolic process	199	-0.309982	-1.7495	2.65045e-06	0.000635776	0.000566707	1845	tags=29%, list=14%, signal=25%	6232/6217/25983/10775/10885/6208/10969/2091/64216/84172/10412/55299/57050/9014/6201/1736/11224/55106/11137/6125/6223/6202/54433/6227/79979/6135/27292/25926/65080/11340/55661/51018/10813/6129/63899/404672/5591/6155/55781/11157/23160/51096/55127/2483/29081/8886/51441/6229/6165/23560/11103/10438/51077/4691/80135/9045/6230
MF	GO:0050136	NADH dehydrogenase (quinone) activity	30	-0.623934	-2.42506	3.97072e-06	0.000923613	0.000823275	2279	tags=53%, list=17%, signal=44%	4717/4726/4702/4713/4712/4711/4724/4725/4709/4707/4718/4700/4710/4694/4698/4697
MF	GO:0009055	electron transfer activity	97	-0.404127	-2.04322	4.31639e-06	0.000946646	0.000843806	2358	tags=40%, list=18%, signal=33%	79689/2110/4717/4726/1355/6391/7386/5860/1337/4702/4713/29796/6390/1528/4712/6715/4711/4724/4725/4709/4707/54205/51022/1353/4718/4700/4710/4694/4129/6392/2108/9167/1329/7388/8560/4698/128/4697/1349
BP	GO:0045333	cellular respiration	163	-0.327047	-1.80261	4.30671e-06	0.000946646	0.000843806	2304	tags=35%, list=17%, signal=29%	26471/2110/4717/3588/4726/1355/29103/6391/7386/2271/205/3419/538/1337/4702/4713/29796/3091/6390/4712/4711/5290/4724/4725/3417/9650/8801/4709/1345/23530/1738/4707/54205/6622/5162/8803/4718/4700/4710/7385/4694/27069/1348/3658/6392/2108/80219/9167/79736/7381/1329/1347/7388/4698/4697/1349/11315
CC	GO:0031252	cell leading edge	351	0.351235	1.60635	5.79609e-06	0.00123586	0.0011016	2814	tags=30%, list=21%, signal=24%	5879/56623/10235/1785/4650/8729/23616/8861/64419/54518/9780/4627/9051/23647/9181/23129/29959/8525/5829/1072/10013/8874/23550/54869/2550/3611/3678/5141/3636/51763/65979/23396/832/7016/491/10163/7094/1729/60/7431/64411/2185/10211/322/1639/51177/3747/7248/9368/8976/2319/3749/11151/6277/1500/2268/7408/51466/6282/23625/3746/5311/6809/55198/72/22902/5152/3984/208/10519/207/1020/1956/1000/22848/23109/11…
MF	GO:0003954	NADH dehydrogenase activity	32	-0.604061	-2.40458	6.08138e-06	0.00126164	0.00112458	2279	tags=50%, list=17%, signal=41%	4717/4726/4702/4713/4712/4711/4724/4725/4709/4707/4718/4700/4710/4694/4698/4697
MF	GO:0015453	oxidoreduction-driven active transmembrane transporter activity	49	-0.512433	-2.24461	7.91541e-06	0.00159891	0.00142521	2279	tags=51%, list=17%, signal=42%	4717/4726/1355/7386/1337/4702/4713/29796/1528/4712/4711/4724/4725/4709/4707/4718/4700/4710/4694/9167/1329/7388/4698/4697/1349
CC	GO:0005681	spliceosomal complex	151	-0.332724	-1.80737	8.48709e-06	0.00167043	0.00148896	1802	tags=35%, list=14%, signal=31%	55280/55192/50804/3185/8539/6634/55660/1207/51340/51362/9410/10236/4236/55596/9879/55110/10465/27336/8896/55119/9939/8487/3550/6434/10492/3181/10713/11157/3312/3192/2483/55696/220988/6009/10285/3183/55015/55234/6637/3190/6426/27258/6632/8559/23658/8458/22938/25949/10286/5935/4691/4116/6635
BP	GO:0000375	RNA splicing, via transesterification reactions	238	-0.289031	-1.6423	9.33104e-06	0.00179063	0.0015961	1833	tags=32%, list=14%, signal=28%	6732/55280/55192/3185/51319/23210/1660/9588/6634/2332/55660/1207/51340/51163/51362/10772/96764/9410/10284/10659/10236/4236/55596/9879/8621/55110/11168/10465/83989/27336/8896/9939/8487/10150/9589/11171/8161/3550/6434/4154/10492/3181/10713/11157/3312/64783/3192/2483/55696/220988/10285/3183/55015/55234/6637/3190/6426/27258/6632/4869/8559/23658/22938/25949/10286/11017/6428/5935/10179/6606/8087/4691/5…
BP	GO:0045785	positive regulation of cell adhesion	418	0.337859	1.56172	9.79329e-06	0.00183349	0.00163431	3197	tags=33%, list=24%, signal=25%	5879/3654/1785/9647/8943/7030/7297/8861/7409/864/54518/9780/10859/54440/920/8874/5970/3566/10272/3965/30008/402/3611/3678/10288/2309/1445/25865/3133/3561/3105/2525/3718/4088/8289/9466/7016/140885/912/8600/604/3728/60/2303/2185/10211/1725/972/5296/7248/3135/5724/2319/11151/3689/6469/3592/6602/6809/5777/6604/959/50848/23308/2529/3170/8995/51043/29984/10519/4852/101/207/5578/3481/3675/3280/57178/811…
BP	GO:0042274	ribosomal small subunit biogenesis	61	-0.464672	-2.15143	1.03287e-05	0.00188769	0.00168262	2184	tags=43%, list=16%, signal=36%	23212/7520/6232/6217/25983/10885/6208/57050/6201/6223/6202/6227/6193/25926/404672/5591/55781/11157/23160/55127/6229/4869/51065/51077/6169/6230
BP	GO:0000729	DNA double-strand break processing	14	-0.778993	-2.3969	1.52235e-05	0.00254034	0.00226436	2367	tags=79%, list=18%, signal=65%	641/5932/5893/10111/55218/55100/83990/4683/51444/7334/7336
BP	GO:0000377	RNA splicing, via transesterification reactions with bulged adenosine as nucleophile	234	-0.289471	-1.65592	1.4743e-05	0.00254034	0.00226436	1833	tags=32%, list=14%, signal=28%	6732/55280/55192/3185/51319/23210/1660/9588/6634/2332/55660/1207/51340/51163/51362/10772/96764/9410/10284/10659/10236/4236/55596/9879/8621/55110/11168/10465/83989/27336/8896/9939/8487/10150/9589/11171/8161/3550/6434/4154/10492/3181/10713/11157/3312/64783/3192/2483/55696/220988/3183/55015/55234/6637/3190/6426/27258/6632/4869/8559/23658/22938/25949/10286/11017/6428/5935/10179/6606/8087/4691/5978/41…
BP	GO:0000398	mRNA splicing, via spliceosome	234	-0.289471	-1.65592	1.4743e-05	0.00254034	0.00226436	1833	tags=32%, list=14%, signal=28%	6732/55280/55192/3185/51319/23210/1660/9588/6634/2332/55660/1207/51340/51163/51362/10772/96764/9410/10284/10659/10236/4236/55596/9879/8621/55110/11168/10465/83989/27336/8896/9939/8487/10150/9589/11171/8161/3550/6434/4154/10492/3181/10713/11157/3312/64783/3192/2483/55696/220988/3183/55015/55234/6637/3190/6426/27258/6632/4869/8559/23658/22938/25949/10286/11017/6428/5935/10179/6606/8087/4691/5978/41…
BP	GO:0032102	negative regulation of response to external stimulus	330	0.350443	1.59956	1.51763e-05	0.00254034	0.00226436	4072	tags=39%, list=31%, signal=28%	4790/79671/23005/10062/7133/22933/10859/79132/64218/5598/409/60343/3965/58509/59307/2896/2874/3134/7132/3133/79890/3105/4088/23170/140885/103/9037/5580/23332/63906/7376/3106/7128/2950/55666/2147/10019/3135/64838/11202/56339/2268/3949/23609/55870/55737/1365/81858/6585/9314/84243/8482/83737/4852/5045/79651/27293/7301/58529/57556/6773/10507/11005/240/5624/55966/3805/1398/11027/313/11240/1813/54209/5…
BP	GO:0006909	phagocytosis	212	0.383781	1.69374	1.79226e-05	0.00286612	0.00255475	3187	tags=37%, list=24%, signal=29%	5879/1785/10062/23616/1201/7409/4627/391/1445/8877/23396/3561/4035/140885/5199/9777/5580/399687/5338/80208/3394/4689/11151/2268/3949/3689/2219/79767/6556/55198/8398/2621/3984/1089/7410/1411/929/25875/7305/9844/811/57118/7301/8291/4486/5880/949/7275/3385/4615/5581/311/4647/54209/653509/25/3683/3601/6714/4067/717/7087/2207/135/55113/22918/1265/5582/613/27102/10461/51411/5914/3684/3055/3495/7052/103…
MF	GO:0106310	protein serine kinase activity	290	0.357973	1.6224	1.78517e-05	0.00286612	0.00255475	2824	tags=33%, list=21%, signal=27%	818/1196/2580/2011/3654/4296/4215/9020/5894/57787/1453/1455/23387/7204/23031/10922/728642/5598/50488/8408/65018/2931/9024/5127/3611/8550/3551/11184/2872/25865/8986/5260/7016/9344/369/5605/1198/5580/5616/1018/6195/4342/1459/22983/23552/816/10494/5579/375449/23617/9149/8569/5566/25778/4261/1612/3984/6793/208/8737/54101/8536/10188/207/1020/5681/5595/9261/5578/22848/6300/57118/2081/10645/5585/7867/10…
BP	GO:0034470	ncRNA processing	305	-0.266787	-1.59088	1.92236e-05	0.00301144	0.00268429	2371	tags=31%, list=18%, signal=26%	55152/9277/5303/64852/79753/26156/55798/79828/92342/22916/23212/55164/8575/79693/54901/23404/6232/192670/6217/25983/10775/10885/6208/26610/10969/2091/51002/64216/10412/10269/10978/55299/57050/6201/1736/11224/11137/4087/6125/25940/6223/6202/54433/6227/55596/339175/79979/6135/55623/25821/27292/25926/65080/11340/55039/25896/26512/55661/51018/10813/6129/63899/404672/23405/80746/5591/6155/55781/3181/1…
BP	GO:0000423	mitophagy	27	0.643944	2.03954	2.63382e-05	0.00396416	0.00353351	3154	tags=63%, list=24%, signal=48%	23647/10013/65018/11140/10075/11331/23192/9776/7249/27429/8473/9927/81631/292/8878/7157/22863
CC	GO:0030027	lamellipodium	170	0.39603	1.7135	2.58711e-05	0.00396416	0.00353351	2520	tags=31%, list=19%, signal=26%	5879/1785/4650/23616/54518/9780/9051/23129/29959/8525/5829/1072/8874/3611/3636/65979/832/7016/10163/60/64411/2185/10211/322/7248/8976/2319/11151/1500/7408/51466/23625/5311/6809/72/22902/3984/10519/207/1020/1000/11133/3737/5034/29780/5880/1495/10381/26986/57175/960/70/11344
MF	GO:0004683	calmodulin-dependent protein kinase activity	22	0.687563	2.08137	2.7759e-05	0.00403445	0.00359616	2121	tags=68%, list=16%, signal=57%	818/8550/2872/5256/5260/5261/2185/816/8569/1612/8536/9261/57118/10645/7867
BP	GO:0042273	ribosomal large subunit biogenesis	61	-0.448544	-2.07675	2.78564e-05	0.00403445	0.00359616	1901	tags=39%, list=14%, signal=34%	140801/51388/10969/10412/55052/55299/11224/6125/6135/51018/6129/51121/55319/8886/55003/6165/4869/6128/23560/6152/6169/80135/51187/9045
BP	GO:0022411	cellular component disassembly	383	0.335545	1.54326	2.86368e-05	0.00407068	0.00362845	2986	tags=33%, list=23%, signal=26%	2580/2011/118/8729/23616/1201/6709/1659/7040/9922/5976/23647/57326/9181/64780/11152/23175/3064/1072/10013/8408/65018/11140/2931/10075/327/11331/23192/2314/64601/9776/2801/10226/1471/6720/25793/80279/488/8289/4035/832/50853/3297/8775/23399/7249/57104/79929/23274/10300/9037/23332/57731/23130/51024/1459/3159/27429/10211/1639/5579/11337/780/57192/706/10763/51368/6721/83743/26100/6602/11132/81858/2581…
BP	GO:0010959	regulation of metal ion transport	326	0.348757	1.59296	2.928e-05	0.00408642	0.00364248	3649	tags=38%, list=28%, signal=28%	818/1785/3779/56848/8514/2771/2539/10859/3064/920/409/7439/54923/945/10288/51763/2783/3718/7009/81/5371/6844/57731/1729/53827/2185/816/10768/80208/22953/2280/79570/5023/3747/6640/2147/9368/706/11151/5987/3781/9454/5566/3792/3746/5311/3783/2035/5777/930/7531/8398/9478/29098/5957/1636/4544/4842/207/1020/1908/5026/3280/6324/2316/2902/6352/7070/3060/468/3784/3077/1760/11027/80024/493/5581/9914/4734/4…
CC	GO:0071556	integral component of lumenal side of endoplasmic reticulum membrane	21	0.690124	2.06459	3.13838e-05	0.00422636	0.00376722	1802	tags=52%, list=14%, signal=45%	6892/3134/3133/3105/56928/972/3106/3135/5311/3107/811
CC	GO:0098553	lumenal side of endoplasmic reticulum membrane	21	0.690124	2.06459	3.13838e-05	0.00422636	0.00376722	1802	tags=52%, list=14%, signal=45%	6892/3134/3133/3105/56928/972/3106/3135/5311/3107/811
BP	GO:0046777	protein autophosphorylation	193	0.382636	1.67398	3.20608e-05	0.00424308	0.00378212	3197	tags=37%, list=24%, signal=29%	1196/2011/3654/4296/4215/50488/8408/65018/1436/8550/9776/11184/2872/1445/25865/790/7016/9344/5605/1198/2242/5526/2022/4342/2185/816/10494/23617/780/9149/8569/2268/5566/1612/23400/6793/1636/8737/9961/207/1020/1956/5595/9261/4914/22848/7301/10155/2081/10645/7070/7867/23604/9625/5159/25/8428/6714/4067/2047/5582/27102/2041/3630/2932/3055/5170/4058/4294/9706/6850/7535
CC	GO:0005747	mitochondrial respiratory chain complex I	33	-0.559467	-2.2301	4.62733e-05	0.00579294	0.00516361	2279	tags=48%, list=17%, signal=40%	4717/4726/4702/4713/4712/4711/4724/4725/4709/4707/4718/4700/4710/4694/4698/4697
CC	GO:0030964	NADH dehydrogenase complex	33	-0.559467	-2.2301	4.62733e-05	0.00579294	0.00516361	2279	tags=48%, list=17%, signal=40%	4717/4726/4702/4713/4712/4711/4724/4725/4709/4707/4718/4700/4710/4694/4698/4697
CC	GO:0045271	respiratory chain complex I	33	-0.559467	-2.2301	4.62733e-05	0.00579294	0.00516361	2279	tags=48%, list=17%, signal=40%	4717/4726/4702/4713/4712/4711/4724/4725/4709/4707/4718/4700/4710/4694/4698/4697
MF	GO:0003955	NAD(P)H dehydrogenase (quinone) activity	33	-0.55924	-2.2292	4.67903e-05	0.00579294	0.00516361	2279	tags=48%, list=17%, signal=40%	4717/4726/4702/4713/4712/4711/4724/4725/4709/4707/4718/4700/4710/4694/4698/4697
BP	GO:0033108	mitochondrial respiratory chain complex assembly	57	-0.449755	-2.0356	4.86776e-05	0.00588628	0.00524681	2727	tags=49%, list=21%, signal=39%	55863/79072/55471/4717/28958/51287/7386/4702/4713/4712/25813/10063/4711/4724/4725/4709/4707/4718/4700/4710/25880/29078/4694/51241/80224/79145/7019/4698
BP	GO:0000422	autophagy of mitochondrion	74	0.486445	1.88378	5.06116e-05	0.00588628	0.00524681	2849	tags=47%, list=22%, signal=37%	2011/23647/11152/3064/10013/8408/65018/11140/2931/10075/11331/23192/9776/6720/25793/7249/23130/51024/1459/27429/11337/706/6721/26100/23400/1513/8473/10645/79065/9927/55294/81631/292/8878/7157
BP	GO:0061726	mitochondrion disassembly	74	0.486445	1.88378	5.06116e-05	0.00588628	0.00524681	2849	tags=47%, list=22%, signal=37%	2011/23647/11152/3064/10013/8408/65018/11140/2931/10075/11331/23192/9776/6720/25793/7249/23130/51024/1459/27429/11337/706/6721/26100/23400/1513/8473/10645/79065/9927/55294/81631/292/8878/7157
BP	GO:0035303	regulation of dephosphorylation	101	0.453671	1.82889	4.92421e-05	0.00588628	0.00524681	2986	tags=42%, list=23%, signal=32%	7040/2771/23175/3064/65018/7529/5725/945/10288/3551/80279/51763/6992/4088/9701/6609/5580/8189/1460/22870/2280/650/7248/1408/7531/51231/9887/10507/66036/26051/1813/5159/5525/23645/6714/8725/23381/5478/2281/8897/8776/2932
CC	GO:0098687	chromosomal region	287	-0.263742	-1.51669	5.98201e-05	0.00685342	0.00610888	2300	tags=31%, list=17%, signal=26%	79003/23347/54820/5892/10111/5931/6249/29082/11144/4659/23122/8243/7520/9984/7486/5431/6672/55143/56897/5000/10671/25983/23219/11130/1111/64859/10051/5111/6990/55166/2332/324/27243/8655/675/10951/84516/10274/1452/7517/6117/51164/55746/54433/27309/23137/55791/5515/4683/1783/55320/25978/5501/25909/23244/51652/348995/54386/5928/25913/4085/5591/51143/3070/10735/25936/3181/80351/23279/4999/5885/81929/…
BP	GO:0042776	proton motive force-driven mitochondrial ATP synthesis	36	-0.530945	-2.14362	6.17975e-05	0.00689136	0.0061427	2279	tags=50%, list=17%, signal=42%	4717/4726/6391/4702/4713/6390/4712/4711/4724/4725/4709/4707/4718/4700/4710/4694/6392/4698
BP	GO:0010720	positive regulation of cell development	265	0.350222	1.57825	6.19468e-05	0.00689136	0.0061427	3580	tags=37%, list=27%, signal=27%	5879/1785/118/23654/7040/7133/22933/23129/8874/3611/63925/7016/2664/51593/5605/56965/8600/1523/9037/816/2290/10494/650/9820/706/6663/23316/6469/23013/22902/10215/29882/6604/50848/3984/8482/1636/10519/10636/1002/4803/7305/3280/811/2316/10507/5034/23028/5624/652/2048/57154/5789/1826/5063/1398/5604/1813/25/4067/4653/646/11344/3207/1382/65981/79791/8140/6692/3037/1605/4851/2247/1627/429/11078/7052/39…
MF	GO:0043021	ribonucleoprotein complex binding	117	-0.341661	-1.77036	6.30708e-05	0.00691617	0.00616482	1721	tags=30%, list=13%, signal=26%	1660/10289/2332/79048/51009/10196/55106/10465/54505/9147/9728/11171/29789/1965/57003/23107/79139/3192/55319/26046/6729/1975/26135/23480/6637/6632/4869/22849/6059/23560/51068/5935/54499/253943/6726
BP	GO:0008380	RNA splicing	338	-0.246981	-1.45831	6.40163e-05	0.00692097	0.0061691	1833	tags=28%, list=14%, signal=25%	6732/55280/55192/64121/3185/51319/23210/1660/11319/9588/6634/10137/2332/56943/10978/55660/1207/51340/51163/51362/10772/96764/9410/10284/5295/25940/10659/10236/4236/55596/9879/8621/55110/11168/10465/5515/83989/6883/27336/8896/55119/9939/3303/8487/10150/9589/11171/285672/8161/3550/389677/6434/4154/10492/80746/3181/10713/11157/3312/64783/3192/2483/55696/220988/9541/10285/3183/55015/6314/3188/23091/5…
BP	GO:0031589	cell-substrate adhesion	311	0.342279	1.55405	7.60263e-05	0.00810524	0.00722472	3606	tags=35%, list=27%, signal=26%	5879/1785/9647/3687/8861/4221/5829/50488/8874/7791/30008/402/3611/3678/7059/4088/7016/81/9344/604/23332/7094/3728/7205/2185/1896/7248/780/11151/3232/3689/10174/7414/7450/1029/7471/2621/29984/25992/10519/4852/1020/1942/3675/811/7301/2316/10894/5034/29780/5880/1435/7070/55966/8516/10516/2192/1398/5581/8500/8455/9806/25/3683/81792/6714/10319/960/4653/2047/5318/79778/3691/3037/9480/1605/613/10461/485…
BP	GO:0000054	ribosomal subunit export from nucleus	13	-0.745115	-2.23955	9.76712e-05	0.0101314	0.00903076	737	tags=46%, list=6%, signal=44%	23212/55781/5901/4869/6059/51068
BP	GO:0033750	ribosome localization	13	-0.745115	-2.23955	9.76712e-05	0.0101314	0.00903076	737	tags=46%, list=6%, signal=44%	23212/55781/5901/4869/6059/51068
BP	GO:0006413	translational initiation	100	-0.359457	-1.8237	0.00010688	0.0109388	0.00975045	1882	tags=33%, list=14%, signal=29%	1979/1974/10289/3646/5436/55024/2332/7812/1968/6189/54505/9470/6193/28985/1965/10605/6451/8669/28969/51441/10987/10959/6188/9689/1975/1964/4690/4869/6059/10480/8562/253943/1977
MF	GO:0030695	GTPase regulator activity	344	0.336068	1.53532	0.000110236	0.0109892	0.00979541	2342	tags=27%, list=18%, signal=23%	9909/23061/5863/10235/4650/79874/8729/23616/7409/7454/7204/9922/23092/6305/5900/63940/9181/9138/27352/8874/8131/23550/54869/51291/10641/6494/9815/23268/11033/2874/4924/23258/116985/23102/9744/9826/79890/79958/3257/2664/392/393/7249/55114/58504/140885/9905/6654/54662/10113/85360/27128/64411/115703/54509/50807/141/8976/22894/2776/9610/119385/396/6004/79735/29098/29984/153/7410/23216/10636/10188/843…
MF	GO:0060589	nucleoside-triphosphatase regulator activity	344	0.336068	1.53532	0.000110236	0.0109892	0.00979541	2342	tags=27%, list=18%, signal=23%	9909/23061/5863/10235/4650/79874/8729/23616/7409/7454/7204/9922/23092/6305/5900/63940/9181/9138/27352/8874/8131/23550/54869/51291/10641/6494/9815/23268/11033/2874/4924/23258/116985/23102/9744/9826/79890/79958/3257/2664/392/393/7249/55114/58504/140885/9905/6654/54662/10113/85360/27128/64411/115703/54509/50807/141/8976/22894/2776/9610/119385/396/6004/79735/29098/29984/153/7410/23216/10636/10188/843…
BP	GO:0031348	negative regulation of defense response	196	0.375167	1.64174	0.000112428	0.011064	0.00986207	2823	tags=34%, list=21%, signal=27%	4790/79671/23005/10062/7133/22933/10859/79132/5598/409/60343/3965/58509/2896/2874/3134/7132/3133/3105/4088/23170/140885/103/5580/63906/7376/3106/7128/2950/55666/3135/64838/56339/2268/3949/23609/55870/55737/81858/9314/84243/83737/4852/5045/79651/27293/7301/6773/11005/240/5624/3805/1398/313/1813/54209/6714/4067/25939/2853/4940/100/135/6895/613/55061
BP	GO:0051056	regulation of small GTPase mediated signal transduction	236	0.357484	1.59769	0.000117248	0.0113924	0.0101547	3467	tags=37%, list=26%, signal=28%	5879/9909/5863/23636/1785/4650/8729/5894/23616/7409/7204/9922/23092/253980/9181/9138/27352/23550/54869/51291/6494/9815/23268/116985/9826/8216/392/393/7249/55114/58504/6654/604/85360/27128/64411/10211/54509/11337/396/50848/29984/7410/8473/4803/64423/4914/11214/6655/3675/55200/5909/9743/1435/8567/50619/2048/9639/55160/1398/22899/26030/5159/9927/25/2203/6714/4653/9828/8878/64787/613/4851/9754/55701/…
BP	GO:0045017	glycerolipid biosynthetic process	191	0.371545	1.62654	0.000131836	0.0126497	0.0112755	3441	tags=38%, list=26%, signal=29%	56623/1120/8694/5297/10062/1201/64419/9600/79143/10554/23175/8525/8527/1606/5106/5293/3636/6720/51763/23396/3635/79575/54872/23399/5298/57104/55697/824/9091/9489/5338/7376/83394/51205/5296/79888/3949/3631/30837/8398/84720/23659/8396/3613/10400/949/8871/1119/63874/65258/27315/8651/5105/51604/55294/9791/10524/56994/2247/8897/8776/93210/1040/55361/22863/5294/1609/8733/246/8760/57048/150094/8818
BP	GO:0045953	negative regulation of natural killer cell mediated cytotoxicity	17	0.703932	1.99519	0.000158382	0.0130725	0.0116523	2156	tags=59%, list=16%, signal=49%	10859/409/3965/3134/3133/3105/3106/3135/3805/1398
BP	GO:0018027	peptidyl-lysine dimethylation	21	0.665103	1.98974	0.000158276	0.0130725	0.0116523	2626	tags=48%, list=20%, signal=38%	4297/55011/10919/9739/23067/9757/55870/6839/56950/6598
MF	GO:0032396	inhibitory MHC class I receptor activity	12	0.769623	1.9819	0.000155432	0.0130725	0.0116523	2209	tags=50%, list=17%, signal=42%	11025/10859/10288/11024/79168/11027
MF	GO:0016278	lysine N-methyltransferase activity	36	0.570112	1.93627	0.000143377	0.0130725	0.0116523	1442	tags=33%, list=11%, signal=30%	4297/2145/30827/10919/9869/9739/79091/23067/9757/55209/55870/6839
MF	GO:0016279	protein-lysine N-methyltransferase activity	36	0.570112	1.93627	0.000143377	0.0130725	0.0116523	1442	tags=33%, list=11%, signal=30%	4297/2145/30827/10919/9869/9739/79091/23067/9757/55209/55870/6839
CC	GO:0071013	catalytic step 2 spliceosome	71	-0.399773	-1.89763	0.000152965	0.0130725	0.0116523	1368	tags=35%, list=10%, signal=32%	51340/51362/9410/10236/55596/55110/8896/9939/10492/3181/3192/2483/55696/220988/3183/6637/3190/6426/27258/6632/22938/25949/10286/4116/6635
BP	GO:0050770	regulation of axonogenesis	136	0.412256	1.73922	0.000139606	0.0130725	0.0116523	4078	tags=44%, list=31%, signal=31%	2011/23654/23129/64218/8408/9024/2664/393/5605/9037/10494/1600/23105/3792/22902/29882/6585/3984/8482/1020/1002/4803/1000/1942/57556/10507/2048/57154/7070/1826/5063/5604/57715/11344/54910/1382/1630/1627/2932/6900/9706/659/6405/27185/51393/2909/23499/7869/2335/5365/8829/6794/2043/9423/10505/4155/57142/7143/9723/26037
BP	GO:0001959	regulation of cytokine-mediated signaling pathway	118	0.412325	1.70307	0.000145115	0.0130725	0.0116523	2590	tags=37%, list=20%, signal=30%	3654/3661/10062/10554/11140/28511/54765/9825/58509/59307/3551/2874/7132/8877/3665/23170/3263/103/56928/972/7376/389856/7128/2950/10019/56339/81858/5777/2621/9641/8737/6773/6352/1435/7186/57663/8651/8996/11240/3557/54209/6586/25939/4940
CC	GO:0000775	chromosome, centromeric region	178	-0.294157	-1.61712	0.000147652	0.0130725	0.0116523	2300	tags=31%, list=17%, signal=26%	79003/54820/6249/29082/4659/23122/8243/55143/10671/25983/23219/11130/10051/6990/55166/2332/324/27243/8655/10951/84516/10274/1452/51164/55746/27309/23137/5515/1783/55320/25978/5501/25909/23244/51652/348995/4085/51143/3070/10735/25936/23279/4999/5885/81929/3192/86/5527/9184/8467/23047/51510/6605/64769/11335
BP	GO:0002263	cell activation involved in immune response	238	0.353828	1.58464	0.000145453	0.0130725	0.0116523	3187	tags=34%, list=24%, signal=26%	56848/8729/54518/7040/10859/64218/5971/3566/3965/6778/6830/2896/5293/6688/3134/3383/3718/8741/4035/9466/6844/2242/604/6097/2185/972/640/7248/5724/3394/602/11151/2268/6813/3689/6556/3955/5777/930/4063/959/8995/27040/2067/51043/4242/7305/3570/10814/8291/5880/22904/4615/2623/11027/5581/5105/54209/25/3683/10538/4067/2207/100/6774/3430/6363/30009/8809/613/5729/7157/55846/5914/3684/5590/5170/975/5294/2…
BP	GO:0002366	leukocyte activation involved in immune response	235	0.347229	1.55136	0.000157808	0.0130725	0.0116523	3187	tags=34%, list=24%, signal=26%	56848/54518/7040/10859/64218/5971/3566/3965/6778/6830/2896/5293/6688/3134/3383/3718/8741/9466/6844/2242/604/6097/2185/972/640/7248/5724/3394/602/11151/2268/6813/3689/6556/3955/5777/930/4063/959/8995/27040/2067/51043/4242/7305/3570/10814/8291/5880/22904/4615/2623/11027/5581/5105/54209/25/3683/10538/4067/2207/100/6774/3430/6363/30009/8809/613/5729/7157/55846/5914/3684/5590/5170/975/5294/2625/6850
BP	GO:0044057	regulation of system process	473	0.309612	1.43812	0.000157831	0.0130725	0.0116523	4261	tags=37%, list=32%, signal=26%	818/3687/10062/9921/7133/2771/2539/23175/2931/7137/7132/6720/2309/8877/51763/3350/488/4088/6804/491/551/1890/57731/3728/40/2185/816/27302/7376/9150/6336/5575/5023/3623/6640/9368/5724/706/11202/7032/1408/489/3781/6663/23316/9454/5566/2035/3778/7125/7531/5152/2621/2903/29098/1636/153/4544/4842/5578/3164/1908/4205/6324/7136/2548/2316/2902/3625/10242/22839/57596/6508/3060/3784/1760/493/8996/552/1813/…
CC	GO:0019866	organelle inner membrane	352	-0.241376	-1.4155	0.000155695	0.0130725	0.0116523	2281	tags=30%, list=17%, signal=25%	2110/1591/4717/55972/4726/1355/64976/29103/6391/3284/4001/28958/7386/51650/113612/253512/51373/5321/1337/54148/51318/4702/4713/29796/6390/55486/80273/28977/10269/55052/54968/4712/25813/7818/3945/28957/57380/23592/4711/139322/10884/4724/122704/4725/78988/10240/5743/9782/65080/9553/3708/3032/1371/55750/28998/4709/6434/3329/29074/11342/1345/23530/4707/54205/23107/100287932/1353/4718/4700/4710/26092/…
BP	GO:0015986	proton motive force-driven ATP synthesis	39	-0.502482	-2.0565	0.000160696	0.0131224	0.0116968	2279	tags=49%, list=17%, signal=40%	4717/4726/6391/4702/4713/6390/4712/4711/4724/4725/4709/4707/4718/4700/4710/4694/6392/4698/523
BP	GO:1903320	regulation of protein modification by small protein conjugation or removal	195	-0.283353	-1.59398	0.000165051	0.0133361	0.0118873	1994	tags=30%, list=15%, signal=26%	9733/10210/10055/9709/10253/9529/2729/9474/9111/3091/3326/11146/7337/23142/26271/6201/7046/10196/6125/55208/3301/7965/6135/51138/3303/6187/330/9320/79444/4085/23376/79139/9349/25898/9373/25950/648/9318/10987/26354/10920/7189/6188/7321/9184/5716/9978/4869/10054/23560/7334/6167/6500/10010/1499/8915/11315/54165/7336
MF	GO:0046965	nuclear retinoid X receptor binding	15	0.719283	1.96492	0.000167194	0.0133686	0.0119162	1084	tags=53%, list=8%, signal=49%	10865/81857/7421/6867/5916/3159/7376/9612
MF	GO:0019843	rRNA binding	52	-0.429521	-1.92127	0.000169633	0.0134237	0.0119654	2184	tags=35%, list=16%, signal=29%	23212/51373/6208/55052/55299/6125/6135/6193/6191/29074/6205/23107/9349/6188/4869/6133/6167/80135
MF	GO:0050321	tau-protein kinase activity	20	0.669048	1.97483	0.000173236	0.013569	0.0120949	703	tags=45%, list=5%, signal=43%	2011/57787/1453/23387/2931/9024/5260/9344/5261
BP	GO:0060759	regulation of response to cytokine stimulus	125	0.412043	1.72412	0.000175467	0.0136049	0.0121269	2590	tags=37%, list=20%, signal=30%	3654/3661/10062/10554/5598/11140/28511/54765/9825/58509/59307/3551/2874/7132/8877/3665/23170/3263/103/56928/972/7376/389856/7128/2950/10019/56339/81858/5777/2621/9641/9314/8737/6773/6352/1435/7186/57663/8651/8996/11240/3557/54209/6586/25939/4940
BP	GO:0006397	mRNA processing	359	-0.244163	-1.4463	0.000194619	0.0149389	0.013316	1837	tags=28%, list=14%, signal=25%	79810/6732/55280/55192/3185/51319/23210/1660/11319/9588/22944/11051/6634/2332/22828/6827/10978/55660/1207/51340/51585/51163/51362/10772/96764/9410/10284/10659/10236/4236/55596/9879/8621/55110/11168/10465/55149/83989/27336/8896/55119/9939/8487/10150/9589/11171/285672/8161/3550/10914/6434/4154/10492/81608/80746/3181/9238/580/10713/11157/3312/64783/10949/3192/2483/55696/23283/220988/9541/10285/3183/…
MF	GO:0008135	translation factor activity, RNA binding	66	-0.400025	-1.86665	0.000205282	0.0154869	0.0138045	2113	tags=39%, list=16%, signal=33%	1938/8892/1974/1933/10289/1917/3646/1968/1936/23708/54505/9470/85476/10102/28985/10767/1965/8669/10987/1975/1964/22849/10480/1915/8562/1977
MF	GO:0001216	DNA-binding transcription activator activity	380	0.324234	1.48895	0.000205793	0.0154869	0.0138045	4162	tags=40%, list=31%, signal=28%	22877/4790/4772/3661/7030/10062/51621/27287/5326/8609/5970/6778/8022/2120/4775/1961/6688/4097/2000/6720/2309/4088/1874/3660/3297/6257/100271849/63974/8061/7008/2116/8456/2303/3211/2295/4782/51157/5307/7376/3659/64763/28999/171017/6663/3232/11108/3236/4901/3727/1649/9189/8521/4520/9314/3663/4209/51043/30062/7023/6689/50674/3164/2355/4205/1052/8928/7757/3229/7629/7593/1316/5993/4808/2002/4605/5309/…
BP	GO:0010257	NADH dehydrogenase complex assembly	39	-0.497008	-2.03409	0.00022203	0.0161397	0.0143864	1853	tags=54%, list=14%, signal=46%	4706/4695/55863/55471/4717/4702/4713/4712/4711/4724/4725/4709/4707/4718/4700/4710/25880/29078/4694/80224/4698
BP	GO:0032981	mitochondrial respiratory chain complex I assembly	39	-0.497008	-2.03409	0.00022203	0.0161397	0.0143864	1853	tags=54%, list=14%, signal=46%	4706/4695/55863/55471/4717/4702/4713/4712/4711/4724/4725/4709/4707/4718/4700/4710/25880/29078/4694/80224/4698
MF	GO:0017171	serine hydrolase activity	148	0.381385	1.61637	0.000222878	0.0161397	0.0143864	4984	tags=51%, list=38%, signal=32%	9159/1506/1200/327/5476/49/649/27429/9361/13/2147/64063/339105/11012/11202/8720/25818/8398/3004/1513/1636/10747/101/64499/5045/2159/54878/23430/5125/5624/5550/7177/43/5644/1512/1675/717/715/26085/7093/6768/1504/5327/8492/5340/4327/3083/5653/5328/5645/7174/4322/4318/4018/8192/43847/1515/23436/25807/1075/164656/3818/440387/9407/5046/3816/11330/4323/5652/3426/10003/5949/56649/5646/154754
CC	GO:0005743	mitochondrial inner membrane	307	-0.249091	-1.48602	0.000218321	0.0161397	0.0143864	2281	tags=30%, list=17%, signal=25%	2110/1591/4717/55972/4726/1355/64976/29103/6391/3284/28958/7386/51650/113612/253512/51373/5321/1337/54148/51318/4702/4713/29796/6390/55486/80273/28977/55052/54968/4712/25813/7818/3945/28957/57380/4711/139322/10884/4724/122704/4725/78988/10240/65080/9553/3032/1371/55750/28998/4709/3329/29074/1345/23530/4707/54205/23107/100287932/1353/4718/4700/4710/25880/29078/7385/4694/27069/51241/1348/10730/9512…
BP	GO:0010977	negative regulation of neuron projection development	116	0.418289	1.72525	0.000229048	0.0164315	0.0146464	3909	tags=43%, list=30%, signal=31%	2580/9139/10498/64218/8408/2931/23258/2664/393/9037/7431/1600/7248/11202/23105/22902/386724/6585/8482/10519/1020/1942/3280/57187/2316/5780/57556/10507/2048/7070/1948/57715/29956/54910/1400/1630/9706/6405/5800/7869/8829/2043/9423/1809/10505/4155/112/5376/57142/7143
BP	GO:0072599	establishment of protein localization to endoplasmic reticulum	31	-0.523587	-2.06425	0.000238291	0.0169363	0.0150964	2957	tags=68%, list=22%, signal=53%	25782/6728/8266/6731/3309/29082/10952/6747/9709/4121/9695/7095/58477/22930/60559/6729/6727/23480/9789/6726/23471
BP	GO:0061564	axon development	397	0.318379	1.46695	0.000243127	0.0171215	0.0152615	4770	tags=43%, list=36%, signal=28%	5879/2011/1785/23334/23654/7204/23129/64218/10013/8609/8408/9024/1436/8022/391/2896/27023/2664/9344/393/5605/54915/6654/9037/57731/60/10211/322/80208/2290/10494/1600/780/23768/706/11202/6277/23105/7408/6469/3792/22902/29882/7414/6585/3984/9314/1267/8482/9638/1020/1002/4803/107/1000/1942/4914/1908/6324/2316/57556/10507/5880/1268/2048/57154/7070/886/1948/1826/5063/5604/1495/10381/655/1813/6586/25/8…
BP	GO:0051438	regulation of ubiquitin-protein transferase activity	45	-0.473248	-2.04433	0.000256868	0.0179247	0.0159775	1942	tags=42%, list=15%, signal=36%	10210/9529/23142/26271/6201/6125/55208/6135/6187/4085/9349/648/10116/9184/7334/6167/6500/11315/54165
BP	GO:0015980	energy derivation by oxidation of organic compounds	235	-0.261859	-1.49271	0.000272544	0.0188473	0.0167998	2304	tags=30%, list=17%, signal=25%	26471/2110/4717/3588/4726/3667/1355/29103/6391/7386/2271/205/3419/538/1337/4702/4713/2673/29796/3091/6390/7360/4712/4711/5290/4724/3643/4725/3417/5501/9650/34/8801/4709/9821/2998/1345/23530/1738/4707/54205/6622/5162/8803/4718/4700/4710/2632/178/7385/4694/27069/1348/7262/3658/6392/2108/80219/9167/79736/7381/1329/1347/10728/7388/4698/4697/1349/11315/5500
BP	GO:0002716	negative regulation of natural killer cell mediated immunity	18	0.674983	1.9302	0.000278744	0.0191039	0.0170285	2156	tags=56%, list=16%, signal=47%	10859/409/3965/3134/3133/3105/3106/3135/3805/1398
BP	GO:0006814	sodium ion transport	189	0.36984	1.61421	0.000286027	0.0194296	0.0173188	5425	tags=54%, list=41%, signal=33%	1785/124565/53373/55238/6539/8884/81/64078/7226/57731/53827/40/10768/6336/79570/6540/6640/9368/23315/9058/5311/6326/29098/26504/4842/207/6554/6324/55117/6520/6535/3784/10991/1760/80024/493/5581/4734/486/1188/23327/1813/6536/57835/26249/55515/288/53826/5318/483/477/10021/476/8912/6584/6327/6528/525/6339/10916/150094/6548/5027/51297/57282/2259/482/5025/6531/54716/7533/6335/6533/54946/54795/7402/234…
MF	GO:0004712	protein serine/threonine/tyrosine kinase activity	43	0.530198	1.86653	0.000297765	0.0200495	0.0178714	2796	tags=40%, list=21%, signal=31%	1196/8550/7016/5605/1198/6195/9149/5566/25778/10188/207/5595/7867/5063/5604/5594/5582
BP	GO:0071526	semaphorin-plexin signaling pathway	41	0.532102	1.86514	0.000307815	0.0203689	0.0181561	5295	tags=76%, list=40%, signal=46%	5879/23616/23654/23129/64218/9037/396/8482/2316/57556/10507/8828/57715/54910/6405/9855/7869/5365/8829/10505/1889/9723/5361/1906/5364/10154/9464/10500/4233/1909/55558
BP	GO:0045834	positive regulation of lipid metabolic process	128	0.405332	1.69834	0.000307025	0.0203689	0.0181561	3154	tags=38%, list=24%, signal=29%	56848/10062/7040/8525/22937/6720/551/23399/57104/824/5580/26119/215/2185/2246/972/7376/13/2147/2268/3949/930/8398/64223/208/9619/7410/207/949/6770/5447/64410/5581/51085/552/5159/58526/6714/4067/10524/6363/23410/344/2247/2488/3630/975/22863
BP	GO:0035304	regulation of protein dephosphorylation	70	0.459338	1.7579	0.00031831	0.0208833	0.0186146	2986	tags=41%, list=23%, signal=32%	7040/2771/3064/65018/7529/5725/945/10288/3551/6992/9701/6609/5580/8189/1460/22870/2280/7248/1408/7531/51231/26051/1813/5159/5525/23645/5478/2281/2932
MF	GO:0043130	ubiquitin binding	75	0.461179	1.78922	0.000326214	0.0211238	0.018829	3283	tags=45%, list=25%, signal=34%	23163/8517/23636/57787/22933/5886/404093/11047/10013/79004/9683/10616/25793/4088/26088/9146/127544/550/7128/55666/81858/23062/4734/55294/10043/3720/8878/55968/8078/3300/51160/7345/51271/51035
CC	GO:0015629	actin cytoskeleton	393	0.311898	1.43545	0.00032748	0.0211238	0.018829	4241	tags=41%, list=32%, signal=29%	5879/2011/118/4650/10307/6709/7454/254102/4627/9051/64780/5829/1072/4542/7791/10095/7137/2314/10120/3611/10487/4046/832/6804/81/10163/50853/9344/10634/824/57731/56928/1729/3728/60/399687/9696/7205/10211/64236/5579/50807/7248/11337/9368/23406/8976/2319/80179/11151/55909/2268/7408/10093/72/881/7414/7125/29844/23164/1612/6455/1410/23307/81569/101/27289/1000/29109/11214/11133/7136/2316/10540/10881/58…
BP	GO:0006414	translational elongation	36	-0.494634	-1.99702	0.000338292	0.0216394	0.0192886	2486	tags=58%, list=19%, signal=48%	9325/10600/6176/1938/1933/1917/79048/6181/1936/85476/120526/65080/9147/10102/9728/10767/51611/26046/22849/1915/6726
BP	GO:1903131	mononuclear cell differentiation	401	0.314004	1.44636	0.000349637	0.0221803	0.0197707	2861	tags=30%, list=22%, signal=24%	4066/4772/2648/8943/10312/56998/7409/864/4627/10859/64218/54440/920/5971/1209/10014/3566/3965/6778/1436/5293/6688/10288/2874/25793/2309/3635/4495/3561/3718/8289/3665/4055/2033/912/7226/6654/2242/678/51341/604/6097/10945/60/8456/2185/972/973/3659/3106/8326/640/5296/7248/3623/23598/3135/3394/26279/602/54856/56339/6469/6602/3955/5777/930/4063/6604/959/2529/7471/2621/8995/1513/51043/4242/101/8325/491…
BP	GO:0022604	regulation of cell morphogenesis	251	0.349252	1.56927	0.00035885	0.0225782	0.0201253	3603	tags=36%, list=27%, signal=27%	5879/2011/1785/23654/4627/23129/64218/1072/8874/9203/1436/3611/391/23268/752/116985/832/7016/81/9344/56965/2242/1523/1856/1729/64411/2185/816/51177/54509/2147/9368/9820/11151/2268/23316/3689/1365/2035/29882/50848/29984/10519/23426/27289/811/2316/10507/5034/29780/5880/23433/2048/57154/5789/2192/5063/1398/22836/23327/25/57175/6714/960/4653/1857/5318/65981/79791/23580/389/3037/1605/1627/11078/3055/6…
MF	GO:0032393	MHC class I receptor activity	17	0.68452	1.94017	0.000374601	0.0233776	0.0208379	2554	tags=41%, list=19%, signal=33%	11025/10859/10288/11024/79168/11027/1512
MF	GO:0001228	DNA-binding transcription activator activity, RNA polymerase II-specific	377	0.323762	1.48801	0.000379736	0.023489	0.0209373	4162	tags=40%, list=31%, signal=28%	22877/4790/4772/3661/7030/10062/51621/27287/5326/8609/5970/6778/8022/2120/4775/1961/6688/4097/2000/6720/2309/4088/1874/3660/3297/6257/100271849/63974/8061/7008/2116/8456/2303/3211/2295/4782/51157/5307/7376/3659/64763/28999/171017/6663/3232/11108/3236/4901/3727/1649/9189/8521/4520/9314/3663/4209/51043/30062/7023/6689/50674/3164/2355/4205/1052/8928/7757/3229/7629/7593/1316/5993/4808/2002/4605/5309/…
BP	GO:0043632	modification-dependent macromolecule catabolic process	484	-0.210105	-1.2977	0.000382508	0.023489	0.0209373	2233	tags=27%, list=17%, signal=23%	5700/29082/10134/9960/1457/7347/25852/64750/10952/6386/5689/23404/51449/2768/8453/10213/10210/23304/9709/9861/996/9529/2729/147339/5686/5684/4121/7398/23607/9695/3093/3326/80267/5713/11146/7337/8450/9690/324/10269/26091/27243/10475/7184/27246/51009/1452/9655/6201/56893/6125/5685/23032/23287/26994/55284/6135/4534/56929/25978/3303/7326/11340/9147/5691/5701/9320/9101/51652/5695/6451/11342/6049/57003…
BP	GO:0060284	regulation of cell development	426	0.310179	1.43332	0.000386684	0.0235571	0.0209979	4300	tags=40%, list=32%, signal=28%	5879/64689/1785/118/9921/23654/7040/7133/22933/10859/23129/64218/8874/8408/2931/9682/3611/2896/63925/3551/7132/7016/2664/81/393/51593/5605/56965/8600/1523/9037/816/2290/430/10494/650/1600/2147/9820/706/6663/3949/23316/23105/6469/23013/55198/22902/10215/29882/7414/6604/6585/50848/3984/8482/1636/10519/5744/10636/207/1020/1002/4803/2487/7305/3280/811/2316/57556/10507/5034/23028/5624/652/2048/57154/5…
BP	GO:0019221	cytokine-mediated signaling pathway	408	0.312414	1.44	0.000391713	0.0236755	0.0211035	3510	tags=33%, list=27%, signal=25%	3654/3661/7297/10062/11025/7133/10859/10554/920/5970/3566/1441/83483/11140/28511/6778/1436/54765/9825/58509/3611/59307/6688/10288/3551/2874/7132/2309/8877/8986/3561/3718/9466/3665/81/6358/23170/3263/103/6654/8600/1460/56928/3587/2185/84818/972/7376/3659/389856/7128/2950/10019/8717/7032/56339/5566/79155/5355/81858/55198/11024/5777/79168/2621/8995/9641/3663/8737/10519/207/5595/8718/3570/10401/26280…
CC	GO:0043202	lysosomal lumen	86	0.443154	1.75104	0.000413933	0.0248231	0.0221264	4396	tags=55%, list=33%, signal=37%	1200/410/4125/138050/6448/2588/2720/8029/5476/4758/6609/176/4126/972/9672/2990/23646/53/3425/23400/1513/8635/4669/2548/63827/3073/2717/1508/5159/356/5549/2331/2638/2239/3423/4958/950/27163/5641/10437/2517/6948/1440/2262/1509/10855/1515
BP	GO:0006123	mitochondrial electron transport, cytochrome c to oxygen	17	-0.647202	-2.10913	0.000473424	0.0279539	0.0249171	753	tags=59%, list=6%, signal=56%	1355/1337/1345/54205/1348/9167/1329/1347/4697/1349
BP	GO:0006301	postreplication repair	22	-0.583963	-2.05611	0.000470811	0.0279539	0.0249171	1791	tags=45%, list=14%, signal=39%	22890/7398/5111/5980/51455/25898/5429/7320/7334/7336
BP	GO:0051091	positive regulation of DNA-binding transcription factor activity	225	0.34874	1.55096	0.000561411	0.0328961	0.0293224	2148	tags=28%, list=16%, signal=24%	8517/3654/28232/9181/64170/5970/64784/10014/65018/3965/11331/2535/23082/10616/3551/8877/25865/8986/4088/51389/3297/2033/5526/8600/51341/1856/8061/3728/10211/10392/1896/5579/650/9830/23373/2319/8717/5987/6469/1649/959/7471/8995/9641/8737/54101/10519/101/207/107/55367/49860/4914/57118/55182/7726/23028/55223/4808/8321/7480/7186/4615/4040
CC	GO:0000502	proteasome complex	51	-0.431629	-1.91098	0.000589423	0.03427	0.030547	2903	tags=51%, list=22%, signal=40%	5698/5682/9352/5717/3315/5700/5689/10213/9861/5686/5684/5713/7337/9690/5685/5691/5701/5695/5683/5887/51377/5702/5716/5718/5710/5706
BP	GO:0031346	positive regulation of cell projection organization	292	0.332576	1.50826	0.000593787	0.03427	0.030547	3598	tags=36%, list=27%, signal=27%	5879/2011/1785/2648/9139/57787/23654/23129/3064/8874/54869/2896/116985/8175/2664/10163/5605/2033/56965/2242/5526/10300/1523/9037/1856/9696/2185/816/54849/10494/23373/8976/9820/23316/22902/29882/7471/3984/5216/8482/9638/8536/23426/1002/4803/4914/55835/3675/6324/57118/2316/80199/10507/23028/2889/5880/1268/23433/2048/57154/8321/5789/1826/5063/5604/655/25/10938/57175/8428/6714/4067/11344/1857/1382/65…
CC	GO:0098576	lumenal side of membrane	25	0.619763	1.93404	0.000634233	0.0363311	0.0323842	2005	tags=52%, list=15%, signal=44%	6892/3134/3133/3105/5476/56928/972/3106/3135/5311/3107/811/359
BP	GO:0002764	immune response-regulating signaling pathway	347	0.320064	1.46371	0.000645438	0.0366991	0.0327123	2668	tags=27%, list=20%, signal=22%	8517/3654/22861/3661/79671/10062/7409/7917/81622/10859/79132/8525/11120/409/5970/11331/58509/10616/54923/945/5293/10288/3551/2874/1445/25865/3635/3105/3665/2033/9473/6654/5580/63906/51296/728/10211/5338/10392/973/3659/933/7128/640/5579/55666/3135/2268/10657/2219/79155/3783/55198/5777/930/8398/23308/3984/10917/7410/83737/929/10318/9261/7305/27293/4814/7301/59338/7070/7867/4615/100132285/5063/11027…
BP	GO:0050807	regulation of synapse organization	157	0.373047	1.59662	0.000657775	0.0371256	0.0330924	3601	tags=40%, list=27%, signal=30%	1201/81926/64218/1072/10288/58504/79414/40/3587/816/1639/1981/55209/23768/11202/23316/55737/29882/386724/6585/8536/1020/1000/1942/4914/26280/10507/2048/8321/6495/5789/8128/5063/1760/54674/4734/22899/547/1813/54209/25/8828/4884/9762/54413/2047/65981/1605/2895/1627/2239/26050/3630/9746/5100/6405/27185/5800/2043/9423/9148/23237/79953
BP	GO:0051924	regulation of calcium ion transport	215	0.349276	1.54625	0.000670952	0.0374587	0.0333894	3849	tags=39%, list=29%, signal=28%	818/56848/2771/2539/10859/3064/920/409/7439/54923/945/10288/51763/3718/7009/5371/1729/2185/816/80208/22953/2280/5023/2147/706/11151/5987/9454/5566/5311/2035/5777/930/7531/8398/9478/5957/1636/4842/1020/5026/3280/2902/6352/7070/3060/11027/80024/5581/9914/8614/1813/5159/25/3753/4067/135/477/6373/2281/5170/4987/6786/781/5294/7349/3306/51393/3603/2946/8832/6548/3270/5027/57165/9495/846/7222/6781/63892…
MF	GO:0003682	chromatin binding	462	0.305475	1.41839	0.000673438	0.0374587	0.0333894	2924	tags=32%, list=22%, signal=26%	23476/6046/4790/10865/23309/4297/23636/2648/339287/3661/51547/2145/10062/8648/8861/4221/473/5976/22933/5252/1912/23558/22907/5970/2071/23523/57658/1107/6830/84656/8888/1108/6688/23125/6720/2309/9968/23060/6881/4088/9985/8289/1874/6829/81/3297/27000/10919/9869/5916/2033/5424/51564/604/6015/8932/1460/84759/1663/60/2303/3159/8314/53615/9112/322/7376/9612/5579/8535/6665/23598/4335/57332/23135/9557/66…
BP	GO:0046631	alpha-beta T cell activation	142	0.37755	1.59439	0.000685799	0.0378719	0.0337576	3197	tags=35%, list=24%, signal=27%	8943/10312/7297/864/10859/64218/54440/5971/3566/3965/6778/2000/3133/3561/3105/3718/604/6097/3659/26279/602/6469/3592/4063/2529/8995/51043/83737/3570/3077/64410/8651/25/10538/100/6774/6363/30009/8809/7704/135/5914/3630/177/5590/11006/975/2625/6850/7535
MF	GO:0018024	histone-lysine N-methyltransferase activity	32	0.569105	1.86891	0.000694173	0.0379361	0.0338149	1442	tags=34%, list=11%, signal=31%	4297/2145/30827/10919/9869/9739/23067/9757/55209/55870/6839
BP	GO:0018108	peptidyl-tyrosine phosphorylation	324	0.322938	1.47452	0.000696847	0.0379361	0.0338149	3575	tags=34%, list=27%, signal=25%	1196/7297/7040/9181/920/409/5315/1436/653361/3678/9094/7132/1445/3718/7016/3297/5605/84619/3263/1198/2242/5526/1856/5580/6464/2185/972/9361/640/10019/780/9149/2268/3689/3592/9640/5777/25778/64223/2621/8995/1636/9031/9961/10188/1956/5595/1942/4914/3481/3280/5518/2688/7301/1442/3570/79643/10507/6352/4486/10645/2048/7070/1119/2623/5604/5581/8651/9625/5007/5159/54209/55294/25/6714/4067/960/2047/23568…
BP	GO:0002250	adaptive immune response	388	0.314413	1.44685	0.000713484	0.0385683	0.0343784	3197	tags=29%, list=24%, signal=23%	10865/10312/7030/7297/7454/7040/11025/7133/81622/10859/64218/54440/64170/920/5971/3566/6778/6830/6494/54923/5293/10288/3134/1445/3383/25865/3133/3635/3105/3718/8741/9466/3665/912/3263/604/5580/6097/127544/2185/972/973/3659/3106/7942/7128/5579/7248/3135/602/57192/5987/3592/6556/3107/11024/5777/731/930/4063/79168/959/23308/2529/8995/27040/3004/713/2067/51043/10747/3570/5909/64421/5585/2048/4791/718…
BP	GO:0007409	axonogenesis	357	0.318899	1.45979	0.000720076	0.0386525	0.0344534	4853	tags=44%, list=37%, signal=29%	5879/2011/1785/23334/23654/7204/23129/64218/10013/8609/8408/9024/1436/8022/391/27023/2664/9344/393/5605/54915/6654/9037/57731/60/10211/322/80208/2290/10494/1600/23768/6277/23105/7408/6469/3792/22902/29882/7414/6585/3984/1267/8482/9638/1020/1002/4803/107/1000/1942/4914/1908/6324/57556/10507/5880/2048/57154/7070/886/1948/1826/5063/5604/10381/655/1813/6586/25/8828/57715/4884/288/11344/54413/2047/549…
BP	GO:0048710	regulation of astrocyte differentiation	26	0.589596	1.85971	0.000755679	0.0388927	0.0346675	4288	tags=69%, list=32%, signal=47%	9682/650/1600/2147/3949/6469/3280/54209/4851/6900/3976/27339/2043/7101/274/9572/4916/3398
BP	GO:2000318	positive regulation of T-helper 17 type immune response	11	0.746163	1.85071	0.000737746	0.0388927	0.0346675	263	tags=27%, list=2%, signal=27%	10865/7297/64170
BP	GO:0032543	mitochondrial translation	84	-0.346992	-1.70135	0.000749995	0.0388927	0.0346675	2600	tags=43%, list=20%, signal=35%	79072/29088/55173/28973/51335/708/60488/79828/64976/28958/51650/283459/51373/54148/51318/28977/55052/55699/7818/28957/10884/122704/78988/51067/10240/85476/65080/9553/10102/28998/63899/29074/23107/9801/11222/55005
BP	GO:0071826	ribonucleoprotein complex subunit organization	175	-0.27897	-1.54256	0.00073189	0.0388927	0.0346675	2419	tags=37%, list=18%, signal=31%	1653/8667/79833/79753/6733/6636/23212/55164/7520/3320/9733/140801/6232/192670/6732/55192/6208/1660/3326/11051/3646/6634/55052/10978/55299/1968/1207/51340/10772/96764/6125/6223/10659/9879/11168/6135/54505/27336/6193/8487/28985/11171/8161/23405/5591/8669/10713/79752/55015/1975/6637/3799/6426/6632/6128/8559/10728/79577/6152/10480/51065/8562/6606/6169/6635
BP	GO:0001818	negative regulation of cytokine production	234	0.337571	1.50792	0.000755072	0.0388927	0.0346675	1748	tags=23%, list=13%, signal=20%	5879/4790/10270/79671/23005/7040/10859/54476/79132/5971/409/79004/9683/3965/58509/59307/945/3134/1445/3635/6992/8986/3718/9466/5371/140885/51564/604/63906/215/7128/2950/55666/3623/2147/602/706/5987/3592/51665/9454/6556/1649/55198/5777/4828/2621/9314/1411/83737/7356/5045/7305
BP	GO:0019216	regulation of lipid metabolic process	274	0.330893	1.4937	0.000760019	0.0388927	0.0346675	3189	tags=32%, list=24%, signal=25%	4790/56848/10062/7040/79143/23175/8525/64784/7536/60343/22937/11331/2874/6720/8877/551/23399/57104/824/10273/5580/6097/26119/215/2185/2246/972/7376/37/650/13/2147/706/79888/2268/3949/8720/27120/23038/55198/930/8398/64223/8396/208/9619/7410/53345/33/207/949/1268/8647/66036/6770/5447/64410/113791/51094/5581/51085/552/5105/5159/54209/55294/5525/58526/6714/4067/10524/29956/6363/23410/344/476/2247/248…
BP	GO:0034660	ncRNA metabolic process	433	-0.217057	-1.32933	0.00074775	0.0388927	0.0346675	1845	tags=23%, list=14%, signal=20%	6232/192670/6217/25983/10775/10885/6208/2908/3091/26610/23379/10969/2091/51002/64216/84172/10412/10269/55699/10978/55299/57050/9014/6201/1736/11224/55106/11137/4087/6125/25940/6223/6202/54433/6227/55596/339175/79979/79664/6135/55623/25821/27292/51067/25926/65080/11340/55039/25896/26512/55661/51018/10813/6129/63899/404672/23405/80746/7702/5591/6155/10302/55781/3181/11157/23160/57570/51096/7257/545…
BP	GO:1901976	regulation of cell cycle checkpoint	42	-0.446249	-1.88251	0.000775088	0.0394012	0.0351207	2683	tags=48%, list=20%, signal=38%	9587/55872/80185/11200/891/55795/1407/1843/9984/55143/79184/675/54465/7517/9675/4085/51143/580/8451/10116
BP	GO:0034329	cell junction assembly	336	0.319605	1.45956	0.000781366	0.039459	0.0351723	3606	tags=34%, list=27%, signal=25%	5879/9647/23616/8861/23654/23129/64218/8874/402/3678/261734/3551/23396/4088/9344/79414/51564/23332/7094/3728/60/40/7205/2185/10211/1981/5010/55209/7248/23768/5317/1500/23316/5566/55737/1365/7414/386724/6585/50848/4868/51599/1636/29984/1020/1000/5578/4914/9074/56125/5339/26280/10507/2889/8642/2048/8321/7070/6495/5789/1948/8128/1826/1016/43/54674/1495/1813/9806/25/6714/4884/4653/54413/79629/2047/53…
MF	GO:0045182	translation regulator activity	108	-0.322807	-1.6605	0.000814907	0.0408838	0.0364424	1882	tags=31%, list=14%, signal=26%	1979/1974/6208/1933/10289/1917/3646/2332/1968/1936/23708/54505/9470/85476/10102/28985/10767/1965/10605/6146/8669/10987/3658/1975/1964/7555/22849/10480/51065/1915/8562/8087/1977
BP	GO:0031396	regulation of protein ubiquitination	158	-0.280822	-1.54006	0.000820703	0.0409073	0.0364632	1942	tags=30%, list=15%, signal=26%	10210/9709/10253/9529/2729/9474/9111/3326/11146/7337/23142/26271/6201/7046/10196/6125/55208/3301/7965/6135/3303/6187/330/9320/79444/4085/23376/79139/9349/25898/9373/648/7189/6188/7321/9184/5716/9978/4869/23560/7334/6167/6500/8915/11315/54165/7336
BP	GO:1904666	regulation of ubiquitin protein ligase activity	20	-0.591262	-2.04192	0.000831528	0.0409155	0.0364705	1561	tags=40%, list=12%, signal=35%	26271/6201/6125/6135/4085/9349/6167/6500
BP	GO:0046339	diacylglycerol metabolic process	20	0.633696	1.87048	0.000828207	0.0409155	0.0364705	1529	tags=40%, list=12%, signal=35%	8694/8525/8527/1606/57104/9489/3991/23659
MF	GO:0042054	histone methyltransferase activity	43	0.509225	1.79269	0.000855764	0.0418398	0.0372944	2511	tags=40%, list=19%, signal=32%	4297/2145/10498/30827/10919/9869/9739/23067/9757/55209/55870/3275/6839/3276/56950/59336/54496
BP	GO:0034497	protein localization to phagophore assembly site	15	0.674156	1.84165	0.000866327	0.0420882	0.0375158	2939	tags=60%, list=22%, signal=47%	23241/23647/11152/23192/9776/26100/79065/9927/55014
BP	GO:0046460	neutral lipid biosynthetic process	29	0.573449	1.8469	0.000882988	0.0420982	0.0375248	2538	tags=48%, list=19%, signal=39%	8694/10062/23175/5106/6720/23399/57104/7376/3949/23659/949/5105/55294/10524
BP	GO:0046463	acylglycerol biosynthetic process	29	0.573449	1.8469	0.000882988	0.0420982	0.0375248	2538	tags=48%, list=19%, signal=39%	8694/10062/23175/5106/6720/23399/57104/7376/3949/23659/949/5105/55294/10524
MF	GO:0008236	serine-type peptidase activity	145	0.37165	1.57389	0.000879759	0.0420982	0.0375248	4984	tags=50%, list=38%, signal=31%	9159/1506/1200/327/5476/49/649/27429/9361/2147/64063/339105/11012/11202/8720/25818/3004/1513/1636/10747/101/64499/5045/2159/54878/23430/5125/5624/5550/7177/5644/1512/1675/717/715/26085/7093/6768/1504/5327/8492/5340/4327/3083/5653/5328/5645/7174/4322/4318/4018/8192/43847/1515/23436/25807/1075/164656/3818/440387/9407/5046/3816/11330/4323/5652/3426/10003/5949/56649/5646/154754
BP	GO:0019941	modification-dependent protein catabolic process	479	-0.209008	-1.27835	0.000896149	0.042462	0.037849	1982	tags=24%, list=15%, signal=21%	51449/2768/8453/10213/10210/23304/9709/9861/996/9529/2729/147339/5686/5684/4121/7398/23607/9695/3093/3326/80267/5713/11146/7337/8450/9690/324/10269/26091/27243/10475/7184/27246/51009/1452/9655/6201/56893/6125/5685/23032/23287/26994/55284/6135/4534/56929/25978/3303/7326/9147/5691/5701/9320/9101/51652/5695/6451/11342/6049/57003/55236/8697/4189/7494/5683/26234/23376/79139/9349/5887/7323/10206/25898/…
CC	GO:0001931	uropod	12	0.72814	1.87507	0.000907255	0.042464	0.0378508	1208	tags=50%, list=9%, signal=45%	4627/9051/6404/23396/10211/2319
CC	GO:0031254	cell trailing edge	12	0.72814	1.87507	0.000907255	0.042464	0.0378508	1208	tags=50%, list=9%, signal=45%	4627/9051/6404/23396/10211/2319
BP	GO:0031345	negative regulation of cell projection organization	155	0.369179	1.57825	0.000935199	0.0432545	0.0385555	4072	tags=41%, list=31%, signal=28%	2580/64689/1785/9139/10498/64218/8408/2931/23258/832/7016/2664/393/9037/5580/7431/1600/7248/11202/23105/51466/22902/386724/6585/8482/10519/1020/1942/3675/3280/57187/2316/5780/57556/5909/10507/2048/7070/1948/57715/29956/54910/1400/1630/9706/6405/5800/7869/5365/8829/2043/9423/348110/1809/10505/4155/112/5376/57142/7143/7533/347240/9723
BP	GO:1902532	negative regulation of intracellular signal transduction	401	0.305786	1.40851	0.000935416	0.0432545	0.0385555	3872	tags=37%, list=29%, signal=27%	79726/56623/599/23636/23334/79671/23005/23616/23295/4221/253980/79132/9181/5598/8527/409/5970/8131/65018/2931/10641/58509/8550/6688/2874/1445/80279/51763/7009/8216/6609/7249/140885/51564/604/5580/7498/5514/63906/64411/27429/972/933/55841/7128/5296/650/2950/55666/7248/10019/9368/3135/23609/9454/55870/1649/5777/2907/10131/8737/4544/10519/3276/1411/10636/83737/207/10318/6317/51231/1942/1032/3675/260…
BP	GO:0045047	protein targeting to ER	28	-0.518863	-1.97828	0.000971434	0.044598	0.0397531	2851	tags=68%, list=22%, signal=53%	6728/8266/6731/3309/29082/10952/6747/9709/4121/9695/7095/58477/60559/6729/6727/23480/9789/6726/23471
MF	GO:0016655	oxidoreductase activity, acting on NAD(P)H, quinone or similar compound as acceptor	43	-0.443049	-1.89973	0.000976091	0.044598	0.0397531	2279	tags=40%, list=17%, signal=33%	4717/4726/4702/4713/9946/4712/4711/4724/4725/4709/4707/4718/4700/4710/4694/4698/4697
MF	GO:0042800	histone methyltransferase activity (H3-K4 specific)	15	0.670362	1.83128	0.0010164	0.0450975	0.0401982	1316	tags=40%, list=10%, signal=36%	4297/30827/9739/23067/9757/55870
BP	GO:0000768	syncytium formation by plasma membrane fusion	47	0.483203	1.72421	0.00101416	0.0450975	0.0401982	3553	tags=45%, list=27%, signal=33%	4627/3566/824/10211/51177/9149/8521/7471/4868/8536/4842/7305/22904/54209/10938/3756/8912/975/50937/4656/6988
BP	GO:0140253	cell-cell fusion	47	0.483203	1.72421	0.00101416	0.0450975	0.0401982	3553	tags=45%, list=27%, signal=33%	4627/3566/824/10211/51177/9149/8521/7471/4868/8536/4842/7305/22904/54209/10938/3756/8912/975/50937/4656/6988
BP	GO:0010770	positive regulation of cell morphogenesis involved in differentiation	71	0.44418	1.70235	0.00100937	0.0450975	0.0401982	2935	tags=37%, list=22%, signal=29%	5879/1785/8874/3611/7016/56965/1523/816/9820/23316/29882/10519/811/2316/5034/2048/5789/5063/1398/25/4653/65981/79791/3037/1627/11078
BP	GO:0010821	regulation of mitochondrion organization	123	0.391836	1.62808	0.00101226	0.0450975	0.0401982	3393	tags=43%, list=26%, signal=32%	599/51547/3064/10013/409/27141/65018/2931/10075/6720/25793/551/7249/2033/51024/1459/27429/89941/8326/706/80179/6721/55737/23259/27113/8398/23400/207/64423/6773/10645/598/5138/8996/2021/54209/55294/4836/5329/292/10449/638/8878/10493/7157/293/2932/64429/5599/79594/29108/57048/572
BP	GO:0050777	negative regulation of immune response	159	0.359697	1.54467	0.0010271	0.0453104	0.0403881	3455	tags=38%, list=26%, signal=28%	79671/10062/10859/79132/409/3566/60343/3965/6778/58509/2896/6688/3134/3133/3635/3105/3718/9466/23170/103/604/7376/3106/7128/3135/5987/56339/2268/23609/5777/8995/84243/51043/4852/5045/79651/7301/6773/11005/3805/3077/1398/1813/54209/6714/4067/25939/4940/30009/613/55061/3630/3055/11006/6850/79594/246/10906/8832/2
BP	GO:0018212	peptidyl-tyrosine modification	326	0.321425	1.46812	0.00103639	0.0454588	0.0405203	3575	tags=33%, list=27%, signal=25%	1196/7297/7040/9181/920/409/5315/1436/653361/3678/9094/7132/1445/3718/7016/3297/5605/84619/3263/1198/2242/5526/1856/5580/6464/2185/972/9361/640/10019/780/9149/2268/3689/3592/9640/5777/25778/64223/2621/8995/1636/9031/9961/10188/1956/5595/1942/4914/3481/3280/5518/2688/7301/1442/3570/79643/10507/6352/4486/10645/2048/7070/1119/2623/5604/5581/8651/9625/5007/5159/54209/55294/25/6714/4067/960/2047/23568…
BP	GO:0050803	regulation of synapse structure or activity	160	0.366935	1.57253	0.00107251	0.0467761	0.0416945	3601	tags=39%, list=27%, signal=29%	1201/81926/64218/1072/10288/58504/79414/40/3587/816/1639/1981/55209/23768/11202/23316/55737/29882/386724/6585/8536/1020/1000/1942/4914/26280/10507/2048/8321/6495/5789/8128/5063/1760/54674/4734/22899/547/1813/54209/25/8828/4884/9762/54413/2047/65981/1605/2895/1627/2239/26050/3630/9746/5100/6405/27185/5800/2043/9423/9148/23237/79953
MF	GO:0043621	protein self-association	56	0.475519	1.75974	0.00109948	0.0476023	0.042431	3508	tags=48%, list=27%, signal=36%	22861/8861/256364/64170/51614/3297/6844/1856/2185/79188/7128/9368/101/29109/5339/6352/189/4615/1398/43/25/7157/6900/8312/24139/57048/2039
BP	GO:0002832	negative regulation of response to biotic stimulus	95	0.407926	1.62558	0.00110386	0.0476023	0.042431	2949	tags=40%, list=22%, signal=31%	79671/23005/10062/22933/10859/79132/409/60343/3965/58509/59307/2896/3134/3133/3105/23170/103/63906/7376/3106/7128/55666/3135/56339/84243/83737/7301/6773/11005/3805/1398/11027/1813/25939/4940/6895/55061/3630
BP	GO:0032633	interleukin-4 production	29	0.568563	1.83117	0.00112095	0.0478024	0.0426093	3970	tags=59%, list=30%, signal=41%	54440/3965/3133/1649/959/7356/8288/2207/8140/5914/5590/2625/6850/1051/3662/5553/80762
BP	GO:0032673	regulation of interleukin-4 production	29	0.568563	1.83117	0.00112095	0.0478024	0.0426093	3970	tags=59%, list=30%, signal=41%	54440/3965/3133/1649/959/7356/8288/2207/8140/5914/5590/2625/6850/1051/3662/5553/80762
BP	GO:1904667	negative regulation of ubiquitin protein ligase activity	10	-0.739423	-2.04545	0.001131	0.0479643	0.0427536	1561	tags=70%, list=12%, signal=62%	26271/6201/6125/6135/4085/9349/6167
MF	GO:0090079	translation regulator activity, nucleic acid binding	81	-0.349057	-1.69156	0.00115456	0.0486945	0.0434045	1836	tags=35%, list=14%, signal=30%	1938/8892/1974/1933/10289/1917/3646/1968/1936/23708/54505/9470/85476/10102/28985/10767/1965/10605/8669/10987/1975/1964/22849/10480/51065/1915/8562/1977
CC	GO:0044304	main axon	56	0.473707	1.75304	0.00116726	0.0489609	0.043642	4201	tags=54%, list=32%, signal=37%	8514/7133/22933/2550/57731/3747/10382/3746/6326/3737/6324/7070/3756/3736/4653/288/4642/1740/3785/135/1605/6900/7349/60484/57165/747/4155/1742/7881/274

## Sheet: SFSWAP_KEGG
ID	Description	setSize	enrichmentScore	NES	pvalue	p.adjust	qvalue	rank	leading_edge	core_enrichment
hsa03010	Ribosome	113	-0.56088	-2.9599	1e-10	3.33e-08	2.32632e-08	1901	tags=48%, list=14%, signal=41%	140801/51318/6232/6217/6208/6181/6144/55052/6201/11224/6125/6223/6202/6227/6138/6135/6189/6193/6187/9553/6210/6129/6191/28998/29074/6137/6142/6146/6155/51121/6205/9349/6228/6170/6188/9801/6235/6166/6229/6165/6233/11222/6128/6133/6164/6152/6160/6167/51065/6157/6169/51187/9045/6230
hsa05012	Parkinson disease	204	-0.32542	-1.84805	5.37826e-07	8.9548e-05	6.25576e-05	2283	tags=36%, list=17%, signal=30%	51465/4717/347733/5700/4726/6391/1812/7386/23516/4217/25800/2770/51807/5689/1337/10213/9861/6647/4702/7417/4713/29796/5686/5684/5713/6390/2773/4712/5567/5685/4711/317/4724/4725/7846/7326/5691/3708/5701/5695/4709/1965/1345/7494/5683/4707/54205/6622/4718/4700/4710/7385/4694/5702/3709/4129/6392/4780/7419/9167/3799/6233/7381/5718/1329/5710/1347/7388/4698/7295/4697/5706/1349/11315
hsa04666	Fc gamma R-mediated phagocytosis	87	0.506642	2.00469	8.13401e-07	9.02875e-05	6.30743e-05	2796	tags=47%, list=21%, signal=37%	5879/1785/56848/5894/7409/7454/1072/10095/653361/5293/3636/8877/23396/3635/10163/8681/5580/5338/5579/5296/50807/7408/10093/8398/3984/27040/208/7410/207/5595/5578/65108/5880/1398/5604/5581/4067/5594/6199/10552/5582
hsa00190	Oxidative phosphorylation	90	-0.414852	-2.04416	2.52537e-06	0.000210237	0.00014687	2279	tags=43%, list=17%, signal=36%	4717/4726/1355/6391/7386/1337/155066/4702/4713/29796/6390/4712/51606/10063/4711/4724/4725/528/4709/1345/4707/54205/1353/4718/4700/4710/7385/4694/6392/9167/7381/1329/1347/7388/4698/523/4697/1349/8992
hsa03040	Spliceosome	105	-0.37915	-1.9406	1.24065e-05	0.000707786	0.000494455	1467	tags=34%, list=11%, signal=31%	55660/23350/51340/51362/10772/9410/9879/55110/10465/8896/55119/9939/3303/6434/10713/11157/3312/3192/55696/220988/10285/3183/6637/3190/6426/27258/6632/8559/23658/22938/25949/10286/11017/6428/4116/6635
hsa05135	Yersinia infection	127	0.429637	1.79901	1.49909e-05	0.000707786	0.000494455	2213	tags=35%, list=17%, signal=30%	5879/8517/4790/3654/4772/3661/7409/7454/9138/5829/920/8874/5970/10095/9815/391/3678/4775/5293/3551/23396/10163/5605/60/6195/2185/5296/8976/2776/10093/3984/27040/208/7410/207/5595/9844/6300/147179/5880/5585/7186/4615/1398/5604
hsa05020	Prion disease	218	-0.295133	-1.66152	1.70039e-05	0.000707786	0.000494455	2356	tags=34%, list=18%, signal=28%	3309/3553/4717/2905/347733/5700/4726/6391/1457/7386/51807/5689/1337/10213/9861/6647/4702/7417/4713/29796/5686/5684/5713/6390/4685/5534/4712/5567/5291/5685/5295/4711/5290/317/4724/4725/5621/7846/3303/5691/3708/5701/5695/4709/1965/1345/5683/4707/54205/3312/4718/4700/4710/7385/4694/5702/3709/1386/6392/7419/9167/3799/7381/5718/1385/1329/5710/1347/5530/7388/4698/4697/5706/1349
hsa05016	Huntington disease	242	-0.28351	-1.62294	1.64161e-05	0.000707786	0.000494455	2279	tags=33%, list=17%, signal=28%	5332/1770/4717/347733/5700/4726/6391/7386/4217/5331/5431/51807/5689/1337/56171/10213/2891/10671/841/9861/6647/4702/7417/4713/29796/5686/5684/5713/6390/5436/4712/6506/84516/51164/5685/4711/317/4724/4899/4725/7846/5691/3708/5701/5695/4709/9821/1345/5683/4707/54205/1387/4718/4700/4710/7385/4694/29982/5702/55081/6392/9519/7419/9167/3799/7381/5718/1385/1329/5710/1347/7019/7388/4698/5440/4697/5706/1349…
hsa05014	Amyotrophic lateral sclerosis	283	-0.266369	-1.55957	2.13344e-05	0.000789374	0.000551451	2279	tags=31%, list=17%, signal=27%	4717/2905/347733/5700/4726/6391/7386/4217/51807/5689/1337/55255/56171/10213/2891/10671/9861/6647/4702/4713/29796/5686/5684/55916/5713/6390/5534/834/4712/6506/84516/9972/51164/56893/5685/55746/4711/317/4724/4725/440738/7846/53371/25978/9782/5691/5701/348995/5695/4709/1965/9821/1345/7494/5683/3181/4707/54205/23279/79139/81929/4718/4700/4710/5903/7385/4694/29982/5702/220988/6392/310/9167/3799/7381/5…
hsa04662	B cell receptor signaling pathway	76	0.483319	1.88073	3.91101e-05	0.00130237	0.000909825	3187	tags=53%, list=24%, signal=40%	5879/8517/4790/4772/5894/7409/11025/10859/5970/4775/5293/10288/3551/3636/3635/5605/6654/973/933/5579/5296/11024/5777/930/79168/208/7410/207/5595/6655/5880/11027/5604/4067/5594/971/2932/11006/975/6850
hsa04910	Insulin signaling pathway	125	0.423828	1.77132	4.41705e-05	0.00133716	0.000934131	3740	tags=51%, list=28%, signal=37%	23265/5894/5106/5293/3551/3636/2872/6720/5256/5260/7249/369/5261/5605/6654/3098/6464/5837/3101/92579/10211/5575/5296/7248/2319/5834/8569/2997/5566/1978/3991/208/207/5595/6655/5499/8471/2889/23433/2002/6517/1398/5604/8651/5105/2203/10603/5594/6199/5564/2645/3630/2932/5590/5170/2308/5599/572/867/25759/3632/51422/5770/5571
hsa00310	Lysine degradation	48	0.539946	1.93203	8.18996e-05	0.00227271	0.0015877	2319	tags=38%, list=18%, signal=31%	4297/8985/2145/79709/55526/223/10919/9869/9739/23067/9757/55870/1892/217/6839/5351/56950/2639
hsa04380	Osteoclast differentiation	123	0.419961	1.755	9.48421e-05	0.00242942	0.00169717	2372	tags=34%, list=18%, signal=28%	5879/8517/4790/9020/4772/7297/7040/11025/10859/5971/5970/1436/653361/5293/6688/10288/3551/7132/10379/140885/8600/8061/5296/4689/3727/11024/79168/208/1513/207/5595/2355/7305/6300/6773/1435/4791/7186/11027/5604/8651/54209
hsa05171	Coronavirus disease - COVID-19	215	-0.277471	-1.55588	0.000148149	0.00352383	0.00246172	1525	tags=25%, list=12%, signal=22%	834/6181/6144/6868/3576/6201/11224/5291/6125/5295/6223/6202/6227/5290/6138/1147/6135/6189/6193/6187/3442/6210/6129/6191/51284/6137/6142/6146/6155/51121/6205/9349/6228/6170/7189/6188/6235/6166/6229/6165/6233/6128/6133/6164/6152/6160/6167/51065/6157/6169/51187/9045/6230
hsa05231	Choline metabolism in cancer	86	0.436793	1.72146	0.000355764	0.00676089	0.00472311	3280	tags=44%, list=25%, signal=33%	5879/1120/5894/7454/5900/8525/8527/1606/5293/23396/10163/7249/5605/8681/6654/5338/5579/5296/7248/1978/208/207/1956/5595/5578/6655/5880/1119/5604/5159/5594/6199/56994/5582/6584/5170/1609/5599
hsa04928	Parathyroid hormone synthesis, secretion and action	99	0.42011	1.70394	0.000365453	0.00676089	0.00472311	2213	tags=35%, list=17%, signal=30%	5894/2778/2771/9138/409/5141/1026/9826/7421/369/6257/5330/8600/6256/5338/5579/9368/2776/5566/3727/8521/4209/64386/5744/1956/107/5595/5578/4205/9586/11214/4326/468/4040/5604
hsa04142	Lysosome	117	0.410221	1.69706	0.000343029	0.00676089	0.00472311	4010	tags=49%, list=30%, signal=34%	23163/8943/10312/1201/527/8906/1200/51172/410/4125/138050/6448/2588/2720/1497/5476/26088/4758/6609/1212/4126/57192/2990/6556/53/3425/23659/1513/23062/4669/2548/3073/537/2717/162/1508/1519/1777/9179/1512/50617/3482/26503/4668/10053/3423/535/950/9114/5641/4864/1174/2517/54/1521/27074/7805
hsa04015	Rap1 signaling pathway	190	0.367166	1.60061	0.000349549	0.00676089	0.00472311	3088	tags=36%, list=23%, signal=28%	5879/10235/5894/2778/7409/54518/5900/2771/9170/1436/6494/5293/25865/5605/7423/5330/7094/60/64411/2246/5579/5296/2776/1500/7408/3689/51466/5216/2903/27040/208/7410/10636/207/2775/1956/4803/107/5595/5578/1942/6300/2902/5909/2889/8817/5880/1268/1435/1398/5604/1813/5159/3683/6714/2251/5594/135/5582/2247/1943/3684/83660/9771/3630/3937/5590/8822/51378
hsa05010	Alzheimer disease	314	-0.233345	-1.39821	0.000569543	0.009982	0.00697336	2279	tags=30%, list=17%, signal=25%	4717/2905/347733/8323/5700/4726/3667/6391/1457/7386/23516/4217/25800/5331/840/51807/5689/1337/355/10213/351/841/9861/4702/7417/4713/29796/5686/5684/55851/5713/6390/324/5534/8883/4712/6868/1452/5291/5685/5295/4711/5290/317/8324/4724/3643/1147/4725/7846/5743/5691/3708/5701/5695/4709/1965/9821/1345/7494/5683/4707/54205/6622/102/4718/4700/4710/7385/4694/29982/5702/3709/8772/6392/4893/7419/3845/9167/1…
hsa04722	Neurotrophin signaling pathway	111	0.394142	1.62459	0.000681267	0.0113431	0.00792421	2614	tags=36%, list=20%, signal=29%	5879/818/4790/3654/4215/5894/25970/5598/5970/5293/3551/2309/5605/6654/5580/6464/6195/816/5296/10019/11108/396/7531/208/207/4803/5595/9261/4914/6655/6300/2889/2549/468/1398/5604/25/356/10603/5594
hsa05163	Human cytomegalovirus infection	203	0.345115	1.50955	0.000994784	0.0157744	0.0110199	2213	tags=31%, list=17%, signal=26%	5879/8517/4790/4772/3661/5894/2778/2771/9138/6892/5829/5970/4775/5293/3551/1026/3134/7132/2783/3133/9826/3105/7249/5605/6654/5330/3587/2185/3106/5579/5296/7248/3135/8717/2776/5566/3107/1029/1978/2782/208/8737/207/2775/1956/107/5595/5578/2787/9586/11214/6655/6300/811/3570/6352/5880/2002/468/7186/1398/5604
hsa04650	Natural killer cell mediated cytotoxicity	115	0.390531	1.61183	0.00118093	0.0174103	0.0121628	2619	tags=31%, list=20%, signal=25%	5879/4772/5894/7409/5293/3383/3133/3105/369/5605/6452/8795/6654/6464/2185/3106/5579/5296/3135/3689/3806/3107/5777/27040/7410/5595/5578/7305/6655/5880/100132285/5604/3683/356/5594/2207
hsa04613	Neutrophil extracellular trap formation	104	0.389878	1.59774	0.00130708	0.0174103	0.0121628	3005	tags=35%, list=23%, signal=27%	5879/4790/5894/79792/10013/5970/10014/6404/653361/5293/5605/5330/51564/27180/60/728/5579/5296/4689/3689/7450/208/207/5595/5578/6300/5880/5604/3683/6714/5594/292/5582/293/3684/177
hsa05164	Influenza A	159	0.368699	1.58196	0.00126836	0.0174103	0.0121628	2691	tags=32%, list=20%, signal=26%	8517/4790/10482/3661/79671/5894/7297/5970/8106/5293/3551/7132/10379/3383/3665/5371/5605/2033/8795/103/60/5579/5296/10898/8717/3592/9230/4261/9641/11100/208/23633/207/64499/5595/5578/23430/6773/6352/896/4615/7177/5604/7187/4600/4599/5644/356/4940/5594/292
hsa05170	Human immunodeficiency virus 1 infection	185	0.35069	1.52148	0.001283	0.0174103	0.0121628	2228	tags=29%, list=17%, signal=25%	5879/8517/4790/3654/4772/3661/5894/7133/8906/2771/6892/5829/1072/920/5970/4775/5293/3551/3134/7132/2783/3133/3105/5605/2185/3106/5579/5296/3135/8717/2776/3107/3984/2782/208/8737/1642/207/2775/5595/5578/2787/6300/811/5880/162/598/7186/4615/10298/5063/1398/5604/8454
hsa03060	Protein export	18	-0.579648	-1.95526	0.00171194	0.021926	0.0153174	2851	tags=72%, list=22%, signal=57%	6728/6731/3309/10952/7095/58477/23478/60559/6729/6727/23480/9789/6726
hsa04120	Ubiquitin mediated proteolysis	120	-0.293995	-1.57432	0.00178726	0.0220428	0.015399	2283	tags=32%, list=17%, signal=27%	51465/4591/331/64750/8453/10055/996/3093/7337/8450/9690/26091/389898/55284/7326/330/9320/79444/55236/8697/7323/25898/8451/10393/8065/7189/7321/55958/7428/9978/9039/6233/7324/10054/7320/7334/6477/11059/6500
hsa04714	Thermogenesis	170	-0.264101	-1.45222	0.00192774	0.0229264	0.0160162	849	tags=31%, list=6%, signal=29%	55471/2180/113/4717/4726/1355/6391/28958/51287/7386/4217/1337/4702/4713/29796/6390/4712/5567/10063/4711/4724/4725/4709/1345/4707/1353/4718/4700/4710/29078/86/7385/4694/51241/6009/1386/6392/4893/6197/3845/9167/7381/1385/1329/1347/6595/7388/4698/6605/2182/4697/1349
hsa04012	ErbB signaling pathway	79	0.421575	1.65334	0.00213043	0.0244632	0.0170899	3481	tags=48%, list=26%, signal=36%	818/5894/5293/1026/369/5605/6654/6464/816/5579/5296/1978/208/207/1956/5595/5578/6655/9542/2549/2002/10298/5063/1398/5604/25/6714/685/5594/6199/5582/2932/1839/5599/572/6777/867/25759
hsa05166	Human T-cell leukemia virus 1 infection	205	0.341225	1.49872	0.00233971	0.0259708	0.018143	2958	tags=34%, list=22%, signal=27%	8517/4790/4215/9020/4772/2648/7040/920/5971/5970/64784/4775/5293/6688/3551/2874/1026/3134/7132/3383/3133/3561/3105/3718/4088/4055/5605/55697/2033/8061/7094/3106/5296/23373/3135/706/3689/5566/51433/3107/29882/1029/208/207/107/5595/9586/811/2002/4791/8295/896/598/468/5604/8498/3683/3601/6908/10524/5594/1870/292/1030/7850/7157/293/83660/64682
hsa03050	Proteasome	41	-0.423867	-1.78131	0.00282888	0.0261671	0.0182802	2233	tags=49%, list=17%, signal=41%	5698/5682/5717/5700/5689/10213/9861/5686/5684/5713/5685/5691/5701/5695/5683/51371/5702/5718/5710/5706
hsa05214	Glioma	69	0.428011	1.63386	0.00253136	0.0261671	0.0182802	2849	tags=41%, list=22%, signal=32%	818/5894/5293/1026/369/5605/6654/6464/816/4616/1643/5579/5296/1029/208/8536/207/1956/5595/5578/6655/57118/5604/5159/5594/1870/5582/7157
hsa04072	Phospholipase D signaling pathway	134	0.371034	1.56843	0.00282822	0.0261671	0.0182802	1767	tags=26%, list=13%, signal=23%	1785/56848/5894/2778/5900/10554/9170/8525/8527/1606/5293/8877/23533/23396/551/7249/5605/8681/6654/5330/6464/27128/2185/5338/2912/5296/7248/2147/208/207/1956/107/5595/5578/6655
hsa04510	Focal adhesion	186	0.338625	1.46965	0.00270049	0.0261671	0.0182802	3481	tags=35%, list=26%, signal=27%	5879/5894/7409/5829/7791/3611/3678/5293/7059/23396/81/7423/6654/824/6464/7094/1729/60/5579/5296/7408/7414/7450/208/7410/207/1956/5595/5578/6655/3675/2316/5499/2889/29780/5880/2002/8516/896/10298/5063/1398/2318/5604/5159/6714/10319/1298/4660/5594/3691/5582/83660/2932/5170/3695/63923/4633/3909/87/5599/2909/572/2335/10398/25759
hsa04010	MAPK signaling pathway	274	0.319062	1.43338	0.00272376	0.0261671	0.0182802	3838	tags=38%, list=29%, signal=27%	5879/8517/4790/3654/4296/4215/10235/9020/4772/5894/7040/5598/5971/409/5970/1436/8550/4775/3551/11184/2872/7132/8986/9344/369/5605/8681/7423/5778/6654/6195/2246/4616/5579/8717/8569/5566/3727/1649/208/929/207/1956/4803/5595/9261/5578/3164/1942/4914/3481/6655/6300/2316/8817/5880/1435/2002/4791/468/7186/7867/4615/1398/994/2318/5604/9064/5871/5159/27092/356/2251/5594/5582/2247/7157/1943/3630/8912/8822…
hsa04020	Calcium signaling pathway	217	0.323727	1.43076	0.0026794	0.0261671	0.0182802	5229	tags=50%, list=40%, signal=31%	818/56848/2778/93129/53373/8877/9127/5256/488/5260/491/5261/7423/5330/2769/2185/816/2246/22953/5579/5023/5724/57192/2776/489/5566/2925/7125/2903/153/8536/4842/1956/4803/107/5578/4914/5026/57118/2902/4486/8817/886/493/552/5159/2251/6869/292/135/56413/5582/2247/293/8912/8822/147/6786/146/5737/57172/777/2248/80228/5731/80271/3270/5027/553/814/8823/3360/2065/1129/775/5025/5137/4485/3357/4916/487/114/…
hsa04911	Insulin secretion	76	0.417314	1.62389	0.00329551	0.0296596	0.02072	4886	tags=58%, list=37%, signal=37%	818/3779/2778/6804/6844/5330/816/5579/2776/3781/5566/3783/3778/107/5578/9586/10242/886/468/486/483/477/5582/476/2645/3630/10488/5864/482/775/112/90993/1388/54795/23439/478/114/115/815/3780/885/3782/109/5568
hsa05142	Chagas disease	97	0.38582	1.55677	0.00350333	0.0307002	0.021447	1932	tags=28%, list=15%, signal=24%	8517/4790/3654/2778/7040/2771/5970/5520/5293/3551/7132/5330/2769/5296/2776/3592/713/208/1636/207/2775/107/5595/6300/5518/811/6352
hsa00100	Steroid biosynthesis	20	-0.520708	-1.80043	0.00360386	0.0307715	0.0214967	2554	tags=60%, list=19%, signal=48%	1718/8435/3930/120227/6713/1591/2222/6307/50814/10682/1595/6646
hsa04014	Ras signaling pathway	203	0.329878	1.4429	0.00373582	0.0311007	0.0217268	3481	tags=36%, list=26%, signal=27%	5879/8517/4790/5863/10235/5894/5878/5900/5970/1436/5293/3551/2783/5605/8681/7423/6654/6464/2246/5338/5579/5296/26279/9610/5566/8398/2903/27040/2782/208/207/1956/4803/5595/5578/1942/4914/3481/2787/6655/2902/8817/5880/2549/1435/2002/598/4303/10298/5063/5604/30814/11186/5159/25/356/2251/5594/5582/2247/1943/9771/3630/8822/51378/7535/4908/22808/5599/572/9462/2248/25759
hsa05160	Hepatitis C	143	0.35768	1.52232	0.00400324	0.0325141	0.0227141	2986	tags=36%, list=23%, signal=28%	8517/4790/3661/5894/7297/10062/5970/5520/7529/5293/3551/1026/7132/10379/10197/3665/369/5605/6654/6256/5010/5296/8717/3949/1365/7531/9641/208/8737/207/1956/5595/9074/6655/5518/6773/949/7186/5604/7187/4600/4599/356/4940/5594/1870/6774/26285/27102/7157/24146/2932
hsa05220	Chronic myeloid leukemia	73	0.40936	1.57801	0.00410242	0.0325264	0.0227227	3481	tags=49%, list=26%, signal=37%	8517/4790/5894/7040/5970/5293/3551/1026/4088/369/5605/6654/6464/4616/1643/5296/1029/208/207/1488/5595/6655/598/1398/5604/25/5594/1870/1487/613/7157/2122/572/6777/867/25759
hsa05221	Acute myeloid leukemia	66	0.419913	1.59235	0.00441766	0.0332176	0.0232056	2915	tags=42%, list=22%, signal=33%	8517/4790/5894/5970/1436/5293/6688/3551/5371/369/5605/6654/3728/5296/1978/208/929/207/5595/6655/1050/5604/5594/6774/6199/7704/5914/3684
hsa04931	Insulin resistance	95	0.376962	1.51856	0.00448887	0.0332176	0.0232056	3033	tags=38%, list=23%, signal=29%	22877/4790/10062/5970/5106/5293/3551/7132/6720/5580/5837/92579/6195/7376/5579/5296/5834/2997/208/8473/207/9586/5499/6517/11000/5581/51085/5105/6774/6199/5564/3630/2932/5590/5170/2308
hsa03013	Nucleocytoplasmic transport	92	-0.306622	-1.51775	0.00443519	0.0332176	0.0232056	1387	tags=26%, list=10%, signal=24%	9972/55746/10284/3841/55110/53371/9939/25909/1434/348995/3842/23279/5901/81929/5903/55161/387082/11260/51068/1915/80145/10527/7341/4116
hsa04064	NF-kappa B signaling pathway	92	0.3977	1.58944	0.00495952	0.0357892	0.0250021	2680	tags=36%, list=20%, signal=29%	8517/4790/3654/9020/5971/5970/3551/7132/3383/4055/8600/1460/1459/4616/1896/7128/5579/8717/959/27040/8737/929/55367/4791/598/7186/4615/7187/7185/4067/60401/29775/6363
hsa04062	Chemokine signaling pathway	171	0.342448	1.48296	0.00505133	0.0357892	0.0250021	3509	tags=36%, list=27%, signal=27%	5879/8517/4790/10235/5894/7409/7454/2771/5829/409/5970/2931/653361/5293/3551/2309/2783/23533/3718/6358/6654/5330/5580/6464/2185/5579/5296/2776/2268/5566/2782/208/7410/207/107/5595/2787/6655/9844/6773/6352/5880/1398/5604/6714/4067/2870/5594/6774/6363/6373/2932/3055/5590/5294/3579/2868/572/6777/25759/10563
hsa05169	Epstein-Barr virus infection	190	0.330579	1.44111	0.00538045	0.0373269	0.0260763	2639	tags=29%, list=20%, signal=24%	5879/8517/4790/3654/9020/3661/7297/864/6892/11047/5971/5970/5293/3551/1026/3134/10379/3383/3133/3105/3718/3665/7431/3106/4616/9612/1643/7128/5296/3135/8717/3107/79685/930/9641/208/8737/207/6300/3280/811/6773/4791/896/7186/4615/4734/7187/3683/5704/4067/960/4940/1870/6774
hsa04810	Regulation of actin cytoskeleton	206	0.323448	1.42247	0.00550042	0.0373804	0.0261137	3468	tags=35%, list=26%, signal=27%	5879/3687/5894/7409/4627/9138/9170/5829/1072/8874/10095/3678/5293/23396/54961/81/10163/369/5605/6654/1729/60/4342/2246/5296/2147/8976/3689/10093/26999/731/7414/3984/5216/8396/208/7410/207/1956/5595/6655/3675/5499/8817/5880/8516/10298/5063/1398/5604/5159/3683/6714/729/2251/4660/5594/3691/10552/2247/3684/3630/8822/3695/735/4633/87/22808/2909/6548/2335/10398/2248
hsa04974	Protein digestion and absorption	82	0.388146	1.51825	0.00596767	0.0397447	0.0277653	5086	tags=51%, list=38%, signal=32%	1506/6510/1294/3783/1289/23428/7512/6520/1310/1302/3784/486/5644/1298/7373/483/477/476/1307/117247/1504/2006/482/5645/206358/23439/1293/1288/478/1300/1299/1291/6550/23436/9056/440387/4224/5646/1284/1357/1305/1301
hsa00514	Other types of O-glycan biosynthesis	30	0.502984	1.63984	0.00617832	0.0403408	0.0281818	2791	tags=47%, list=21%, signal=37%	8985/79709/5986/56983/26290/3955/10585/8473/4242/2590/8703/55568/11226/79623
hsa04664	Fc epsilon RI signaling pathway	62	0.421733	1.58815	0.00642649	0.0411542	0.0287501	3280	tags=44%, list=25%, signal=33%	5879/5894/7409/5293/3635/5605/8681/6654/5296/27040/208/7410/207/5595/5578/6655/6300/5880/240/5604/4067/5594/2207/3937/5170/6850/5599
hsa03008	Ribosome biogenesis in eukaryotes	56	-0.361579	-1.64122	0.00679596	0.0426991	0.0298293	1811	tags=32%, list=14%, signal=28%	10775/10885/55916/2091/1736/54433/10813/55781/102157402/23160/51096/5901/55127/26354/23560/29889/51068/51077
hsa00052	Galactose metabolism	26	0.52207	1.63571	0.00726084	0.0447752	0.0312796	2888	tags=42%, list=22%, signal=33%	2720/3098/3101/92579/2584/2548/2592/2717/5211/5214/2645
hsa05146	Amoebiasis	100	0.36725	1.49434	0.00771961	0.0459041	0.0320683	1724	tags=23%, list=13%, signal=20%	4790/2778/7040/5878/5970/5293/81/912/5330/2769/5269/5579/5296/2776/3689/3592/5566/731/7414/929/6317/107/5578
hsa05165	Human papillomavirus infection	298	0.302234	1.36762	0.0075836	0.0459041	0.0320683	3245	tags=32%, list=25%, signal=25%	8517/4790/10312/3661/5894/7297/2778/527/5829/5970/5315/5520/2535/3678/1108/5293/3551/1026/3134/7132/7059/10379/3133/5986/3105/7249/5605/2033/6654/5526/1856/3659/3106/8326/5296/7248/9368/3135/8717/10474/5566/3107/3955/7450/7471/1978/9641/208/4242/207/8325/1956/5595/9586/6655/3675/3280/5518/9296/6773/537/8321/7480/8516/896/5604/7187/4600/27175/5159/5525/4599/356/10319/6908/1298/1857/50617/5594/1740…
hsa05416	Viral myocarditis	55	0.422837	1.55967	0.00849491	0.047086	0.032894	2404	tags=29%, list=18%, signal=24%	5879/3134/3383/3133/3105/60/3106/1981/3135/3689/3107/959/5880/25/3683/1982
hsa04970	Salivary secretion	77	0.394014	1.53817	0.00850569	0.047086	0.032894	4501	tags=52%, list=34%, signal=34%	2778/4069/1471/491/6844/5330/5579/1473/2776/5566/1470/3783/3778/153/4842/4025/107/5578/362/6522/493/486/5542/483/477/5582/476/147/146/6548/54831/482/112/23439/478/6779/114/115/155/727897
hsa04912	GnRH signaling pathway	81	0.388151	1.5229	0.00827569	0.047086	0.032894	4964	tags=58%, list=38%, signal=36%	818/4215/5894/2778/5598/5605/8681/6654/5330/5580/2185/816/5338/5579/2776/5566/1956/107/5595/5578/6655/6300/2002/468/5604/6714/5594/2488/1839/5599/2797/4216/775/112/5609/1432/1081/114/5600/115/815/5603/2796/109/5568/4323/2885
hsa04658	Th1 and Th2 cell differentiation	84	0.374707	1.46952	0.00867965	0.047086	0.032894	601	tags=15%, list=5%, signal=15%	8517/4790/4772/7297/864/920/5970/3566/6778/4775/3551/3561/3718
hsa05225	Hepatocellular carcinoma	149	0.34413	1.46818	0.00817481	0.047086	0.032894	3754	tags=44%, list=28%, signal=32%	5894/7040/2535/5293/1026/4088/8289/369/5605/8110/6654/1856/6464/60/4616/1643/8326/5579/5296/2950/6602/6604/1029/7471/208/207/8325/1956/5595/5578/3481/6655/6601/2549/2947/2002/8321/9817/7480/598/4040/5604/6603/8193/1857/5594/6598/1870/6199/6597/5582/7157/2932/8312/2948/7481/2949/2946/572/25759/114112/54361/2944/10912/7048
hsa04024	cAMP signaling pathway	197	0.317458	1.38636	0.00876677	0.047086	0.032894	4512	tags=42%, list=34%, signal=28%	5879/818/4790/4772/5894/2778/7409/2771/5970/2550/7137/5141/5293/3350/488/491/5605/2033/64411/816/5338/5296/489/5566/2903/3991/208/153/7410/4852/207/107/5595/1908/9586/7434/5499/2902/5880/5604/493/486/1813/2735/5594/64091/135/4158/483/477/10021/476/2488/2696/64208/8310/5599/572/6548/10398/1395/4881/814/10488/3360/482/1129/775/112/90993/6750/23439/478/487/1081/114/54714/115/1906/2890/815/2737/3352
hsa04659	Th17 cell differentiation	99	0.367141	1.48911	0.00936148	0.0487089	0.0340277	957	tags=18%, list=7%, signal=17%	8517/4790/4772/7297/7040/920/5970/3566/6778/4775/3551/3561/3718/4088/9466/6257/6097/6256
hsa04210	Apoptosis	129	0.348672	1.46337	0.00924452	0.0487089	0.0340277	2614	tags=35%, list=20%, signal=28%	8517/4790/9020/5894/6709/823/5970/143/5293/3551/7132/5605/10376/8795/824/60/27429/843/4616/5296/8717/84790/1649/27113/208/1513/8737/207/4803/5595/55367/4914/84823/2081/598/468/7186/5604/1508/1519/2021/7185/356/1512/5594

## Sheet: MAP3K3_GO
ONTOLOGY	ID	Description	setSize	enrichmentScore	NES	pvalue	p.adjust	qvalue	rank	leading_edge	core_enrichment
CC	GO:0022626	cytosolic ribosome	89	-0.581178	-2.70499	1e-10	1.09657e-07	9.37895e-08	1526	tags=45%, list=12%, signal=40%	9349/6193/6125/6206/6223/6142/6128/6208/6187/6189/11224/6191/6155/6138/6129/6170/6146/6228/6169/54505/6165/6229/6167/6133/6166/6188/6130/6160/6157/6205/51065/6233/6235/6164/6230/6210/6227/51121/9045/6152
MF	GO:0003735	structural constituent of ribosome	131	-0.539887	-2.68295	1e-10	1.09657e-07	9.37895e-08	1613	tags=43%, list=12%, signal=38%	51373/51023/9801/9349/6193/6125/29093/6206/6223/6142/6128/55052/6208/28977/6187/122704/6189/11224/6191/6155/7818/6138/10884/28998/6129/51650/6170/6146/29074/6228/6169/78988/10240/6165/6229/6167/6133/6166/6188/11222/6130/6160/6157/6205/51065/6233/6235/6164/9553/6230/6210/6227/51121/51187/9045/6152
BP	GO:0002181	cytoplasmic translation	136	-0.521395	-2.59513	1e-10	1.09657e-07	9.37895e-08	1526	tags=41%, list=12%, signal=37%	9349/6193/6125/2107/6206/6451/1974/6223/6142/6128/6208/51611/6187/3184/6189/11224/6191/6155/51441/6138/6129/2332/1660/6170/8669/55854/6146/6228/6169/54505/6165/6229/28985/6167/4690/22849/6133/6188/9147/6130/6160/6157/6205/8562/120526/6233/6235/10492/6164/6230/10480/6210/6227/51121/9045/6152
CC	GO:0044391	ribosomal subunit	144	-0.503397	-2.50629	1e-10	1.09657e-07	9.37895e-08	2193	tags=46%, list=17%, signal=39%	55037/23107/64976/51021/51318/6201/28957/51373/51023/9801/9349/6193/6125/29093/6206/6223/6142/6128/55052/54148/6208/28977/6187/122704/6189/11224/6191/6155/7818/6138/10884/28998/6129/51650/6170/6146/29074/6228/6169/54505/78988/10240/6165/6229/6167/6133/6166/63899/6188/11222/6130/6160/6157/6205/51065/6233/6235/4869/6164/9553/6230/6210/6227/51121/9045/6152
CC	GO:0005840	ribosome	165	-0.480502	-2.46403	1e-10	1.09657e-07	9.37895e-08	2193	tags=44%, list=17%, signal=37%	55037/23107/64976/51021/51318/689/6201/28957/51373/51182/51023/9801/9349/6193/6125/29093/6206/6223/6142/6128/55052/54148/6208/28977/6187/122704/6189/11224/6191/6155/7818/6138/10884/28998/6129/51650/8939/1660/6170/6146/29074/6228/6169/54505/78988/10240/6165/6229/6167/4690/6133/6166/63899/6188/11222/6130/6160/6157/6205/51065/6233/6235/4869/6164/9553/6230/6210/6227/51121/51187/9045/6152
BP	GO:0022613	ribonucleoprotein complex biogenesis	357	-0.358324	-2.03373	1e-10	1.09657e-07	9.37895e-08	2113	tags=35%, list=16%, signal=30%	8850/6633/10728/58155/92342/6636/8450/27292/3646/29063/91746/8780/27336/6201/2091/9326/25983/1653/83443/6634/11168/10813/11052/79833/7514/9733/8161/79979/6629/7520/10978/6193/6430/112479/29102/6125/10556/29093/51340/11051/5591/6223/55720/55636/6606/10885/6128/22868/10772/55052/54955/23451/6208/51096/472/29081/8487/5303/2483/11224/10775/6155/51441/6059/10969/11157/55015/8886/6129/25926/11171/1660/…
BP	GO:0006412	translation	490	-0.314762	-1.83404	1e-10	1.09657e-07	9.37895e-08	1992	tags=29%, list=15%, signal=26%	51318/79072/85476/3646/29063/8672/7072/6201/1967/7298/25983/1653/167227/10767/79828/28957/23369/51373/10289/8872/51023/9801/9349/6193/7175/4292/1933/6125/7965/2107/29093/5591/28969/6206/6451/1974/6223/9451/6142/6128/10102/22868/5436/55052/54148/79048/351/3658/6208/51611/28977/4691/6187/3184/5611/122704/6198/29081/6189/11224/6191/6155/7818/51441/6059/9689/26610/6138/10884/28998/6129/26046/2332/196…
BP	GO:0042254	ribosome biogenesis	235	-0.382478	-2.06254	3.27747e-10	3.14474e-07	2.68968e-07	3476	tags=51%, list=26%, signal=38%	9277/140801/55661/6232/4736/79039/10171/26156/23195/23212/81875/6218/6202/10799/6135/9816/23016/55759/1736/51550/10412/51575/55299/54680/4927/9790/3921/57602/55006/65080/84549/51106/6217/55035/23404/6147/54552/8850/92342/8450/27292/29063/8780/6201/2091/9326/25983/10813/7514/79979/7520/6193/112479/29102/6125/10556/29093/5591/6223/55720/55636/10885/6128/22868/55052/54955/6208/51096/29081/5303/2483/…
BP	GO:0042773	ATP synthesis coupled electron transport	73	-0.558268	-2.50605	1.98075e-09	1.52042e-06	1.30041e-06	2516	tags=59%, list=19%, signal=48%	1355/4720/51103/27069/4722/983/4695/1329/1337/1350/4702/4708/4726/29103/1340/4706/1345/4711/4707/891/9167/29796/4694/4725/6391/54205/1738/7385/4700/7381/4712/4698/4718/4724/6392/1349/11315/4710/4709/7388/1348/4697/1347
BP	GO:0042775	mitochondrial ATP synthesis coupled electron transport	73	-0.558268	-2.50605	1.98075e-09	1.52042e-06	1.30041e-06	2516	tags=59%, list=19%, signal=48%	1355/4720/51103/27069/4722/983/4695/1329/1337/1350/4702/4708/4726/29103/1340/4706/1345/4711/4707/891/9167/29796/4694/4725/6391/54205/1738/7385/4700/7381/4712/4698/4718/4724/6392/1349/11315/4710/4709/7388/1348/4697/1347
BP	GO:0022904	respiratory electron transport chain	87	-0.519217	-2.39932	2.39563e-09	1.67172e-06	1.42981e-06	2516	tags=55%, list=19%, signal=45%	1355/4720/51103/27069/4722/983/4695/11232/1329/1337/1350/2110/23369/4702/4708/4726/29103/1340/4706/1345/4711/8604/4707/891/9167/29796/4694/4725/6391/54205/1738/7385/4700/7381/4712/4698/4718/4724/6392/2108/1349/11315/4710/4709/7388/1348/4697/1347
CC	GO:0015934	large ribosomal subunit	87	-0.510537	-2.35921	6.00112e-09	3.68372e-06	3.15067e-06	1551	tags=41%, list=12%, signal=37%	9801/9349/6125/29093/6142/6128/55052/54148/28977/122704/11224/6155/6138/10884/28998/6129/6170/6146/29074/6169/78988/6165/6167/6133/6166/63899/11222/6130/6160/6157/4869/6164/9553/51121/9045/6152
CC	GO:0098798	mitochondrial protein-containing complex	188	-0.39778	-2.08342	6.23871e-09	3.68372e-06	3.15067e-06	2246	tags=41%, list=17%, signal=35%	4722/55037/23107/4695/11232/64976/51660/51021/51318/1329/1337/1350/54927/56922/9804/28957/51373/55669/4702/51023/9801/4708/100287932/29093/4726/29103/8050/1340/8801/4706/1345/4711/55052/54148/4707/28977/9167/29796/139322/55750/122704/3032/4694/4725/7818/6391/10884/28998/51650/1738/26521/29074/7385/4700/78988/10240/10845/7381/4712/221154/4698/4718/63899/4724/5162/11222/6392/1349/4710/25874/4709/95…
BP	GO:0019646	aerobic electron transport chain	67	-0.555635	-2.45202	9.9887e-09	5.47666e-06	4.68418e-06	2516	tags=60%, list=19%, signal=49%	1355/4720/51103/4722/4695/1329/1337/1350/4702/4708/4726/29103/1340/4706/1345/4711/4707/9167/29796/4694/4725/6391/54205/1738/7385/4700/7381/4712/4698/4718/4724/6392/1349/11315/4710/4709/7388/1348/4697/1347
BP	GO:0006119	oxidative phosphorylation	92	-0.481213	-2.24255	3.55661e-08	1.82003e-05	1.55667e-05	2516	tags=51%, list=19%, signal=42%	1355/4720/51103/27069/4722/983/4695/1329/1337/1350/4436/4702/4708/4726/29103/1340/4706/1345/4711/205/4707/538/891/9167/29796/4694/4725/6391/54205/1738/79736/7385/4700/7381/4712/4698/4718/4724/6392/1349/11315/4710/4709/7388/1348/4697/1347
CC	GO:0070469	respirasome	69	-0.529183	-2.32826	8.115e-08	3.89317e-05	3.32982e-05	2516	tags=57%, list=19%, signal=46%	1355/4720/51103/4722/4695/1329/1337/1350/23530/4702/4708/4726/1340/4706/1345/4711/4707/9167/29796/4694/4725/6391/54205/7385/4700/7381/4712/4698/4718/4724/6392/1349/4710/4709/25994/7388/1348/4697/1347
CC	GO:0005746	mitochondrial respirasome	65	-0.5336	-2.34707	1.97457e-07	8.91576e-05	7.62563e-05	2516	tags=57%, list=19%, signal=46%	1355/4720/51103/4722/4695/1329/1337/1350/23530/4702/4708/4726/1340/4706/1345/4711/4707/9167/29796/4694/4725/6391/7385/4700/7381/4712/4698/4718/4724/6392/1349/4710/4709/7388/1348/4697/1347
CC	GO:0098803	respiratory chain complex	62	-0.534074	-2.32813	2.13588e-07	9.10834e-05	7.79034e-05	2484	tags=56%, list=19%, signal=46%	4720/51103/4722/4695/1329/1337/1350/4702/4708/4726/1340/4706/1345/4711/4707/9167/29796/4694/4725/6391/7385/4700/7381/4712/4698/4718/4724/6392/1349/4710/4709/7388/1348/4697/1347
CC	GO:0015935	small ribosomal subunit	61	-0.542935	-2.36701	3.36397e-07	0.000135905	0.000116239	2193	tags=49%, list=17%, signal=41%	55037/23107/51021/6201/28957/51373/51023/6193/6206/6223/6208/28977/6187/6189/6191/7818/51650/6228/54505/10240/6229/6188/6205/51065/6233/6235/4869/6230/6210/6227
CC	GO:0022625	cytosolic large ribosomal subunit	51	-0.561256	-2.34982	3.83898e-07	0.00014734	0.000126019	1526	tags=43%, list=12%, signal=38%	9349/6125/6142/6128/11224/6155/6138/6129/6170/6146/6169/6165/6167/6133/6166/6130/6160/6157/6164/51121/9045/6152
CC	GO:0022627	cytosolic small ribosomal subunit	38	-0.62473	-2.44522	5.33346e-07	0.000186089	0.000159162	1500	tags=50%, list=11%, signal=44%	6201/6193/6206/6223/6208/6187/6189/6191/6228/54505/6229/6188/6205/51065/6233/6235/6230/6210/6227
CC	GO:0098687	chromosomal region	287	-0.323422	-1.78098	5.09424e-07	0.000186089	0.000159162	3205	tags=45%, list=24%, signal=35%	3192/9183/10111/11339/23310/2491/55839/57405/23064/6117/79723/11200/81565/8243/699/5892/55791/7517/64151/641/79019/56897/1763/23291/545/55274/64859/26039/65986/57122/7405/23421/3981/4175/983/11004/55193/4171/84516/79682/8850/10728/11177/27309/701/7272/1111/6990/7486/5516/55143/51652/25983/8655/10671/79003/7514/4436/54820/7520/5000/10635/4659/29082/5931/7175/7153/675/5591/64769/55746/25978/7756/27…
CC	GO:0098800	inner mitochondrial membrane protein complex	91	-0.46321	-2.16035	5.88039e-07	0.000196252	0.000167853	2246	tags=46%, list=17%, signal=39%	4722/4695/51660/1329/1337/1350/54927/4702/4708/100287932/4726/29103/1340/4706/1345/4711/4707/9167/29796/139322/55750/4694/4725/6391/7385/4700/7381/4712/221154/4698/4718/4724/6392/1349/4710/25874/4709/7388/1348/4697/10440/1347
BP	GO:0006364	rRNA processing	173	-0.360343	-1.87275	7.07722e-07	0.000217299	0.000185855	3639	tags=52%, list=27%, signal=38%	9188/51504/55164/11056/23076/9277/55661/6232/4736/79039/10171/26156/23195/23212/6218/6202/10799/6135/23016/55759/1736/10412/51575/55299/54680/9790/57602/55006/65080/84549/51106/6217/55035/23404/8850/92342/27292/29063/8780/6201/2091/9326/25983/10813/79979/112479/29102/6125/10556/5591/6223/55720/55636/10885/6208/51096/29081/5303/2483/11224/10775/6155/51441/10969/11157/8886/6129/25926/23160/11137/40…
BP	GO:0006397	mRNA processing	359	-0.295235	-1.67602	6.96243e-07	0.000217299	0.000185855	2119	tags=33%, list=16%, signal=28%	10236/6633/10465/58155/22828/6636/55197/10150/80324/22944/55149/11193/1655/91746/23091/64895/140890/7072/3189/27336/8899/1653/83443/6634/11168/11052/4236/79833/9733/8161/51319/23398/6629/55660/10978/9589/1665/3312/6430/83989/51340/11051/3550/55110/5511/6606/11017/285672/10772/351/55596/3181/10949/23451/55119/23210/4691/51691/79810/8487/2483/10915/11066/9541/11157/55015/3183/80746/9984/8621/2332/1…
CC	GO:0000775	chromosome, centromeric region	178	-0.364729	-1.89389	8.94067e-07	0.000263956	0.000225761	2440	tags=48%, list=18%, signal=39%	3192/9183/11339/23310/2491/55839/57405/79723/81565/8243/699/64151/79019/23291/55274/26039/57122/7405/23421/11004/55193/84516/79682/8850/11177/27309/701/7272/6990/5516/55143/51652/25983/8655/10671/79003/7514/54820/4659/29082/7175/7153/64769/55746/25978/7756/27243/55055/51164/23122/9126/51143/891/23244/25909/86/4999/81929/79023/2332/3070/11130/5885/10051/23219/55320/5501/10274/6605/5527/9184/8467/5…
BP	GO:0022411	cellular component disassembly	383	0.341181	1.67266	9.95977e-07	0.000283152	0.00024218	2119	tags=29%, list=16%, signal=25%	2011/7040/11152/1471/9922/1201/11140/8729/6709/10226/1072/23647/2580/5976/9181/23616/3297/57104/327/832/2314/57326/10300/706/11331/7157/8408/57192/10013/25793/118/2931/64780/6604/10211/8775/51368/4035/8289/4778/23399/3159/11337/23400/1639/7249/9776/23192/10075/80279/50853/2801/5499/5579/65018/5045/6601/713/6455/8878/27183/10524/6598/6720/79643/11132/9037/3064/9948/6811/84164/81858/26993/58526/646…
BP	GO:0000377	RNA splicing, via transesterification reactions with bulged adenosine as nucleophile	234	-0.327847	-1.76714	1.09193e-06	0.000289022	0.0002472	2119	tags=35%, list=16%, signal=30%	10236/6633/10465/58155/6636/10150/11193/1655/91746/7072/3189/27336/8899/1653/83443/6634/11168/4236/79833/9733/8161/51319/23398/6629/55660/9589/3312/6430/83989/51340/3550/55110/6606/11017/10772/55596/3181/23451/23210/4691/51691/8487/2483/11066/11157/55015/3183/8621/2332/11171/5935/1660/96764/9879/51362/59286/10179/6732/10284/10659/6434/6632/4154/6428/3190/220988/23658/22938/6635/4869/10492/25949/6…
BP	GO:0000398	mRNA splicing, via spliceosome	234	-0.327847	-1.76714	1.09193e-06	0.000289022	0.0002472	2119	tags=35%, list=16%, signal=30%	10236/6633/10465/58155/6636/10150/11193/1655/91746/7072/3189/27336/8899/1653/83443/6634/11168/4236/79833/9733/8161/51319/23398/6629/55660/9589/3312/6430/83989/51340/3550/55110/6606/11017/10772/55596/3181/23451/23210/4691/51691/8487/2483/11066/11157/55015/3183/8621/2332/11171/5935/1660/96764/9879/51362/59286/10179/6732/10284/10659/6434/6632/4154/6428/3190/220988/23658/22938/6635/4869/10492/25949/6…
BP	GO:0022900	electron transport chain	134	-0.391424	-1.95816	1.25249e-06	0.000316623	0.000270807	2516	tags=42%, list=19%, signal=34%	1355/4720/51103/27069/4722/983/4695/11232/1329/1337/1350/2110/23369/4702/4129/4708/2731/4726/29103/51022/1340/4706/1345/4711/8604/4707/6715/891/9167/29796/4694/4725/6391/54205/1738/1528/7385/4700/8560/7381/4712/1353/4698/4718/4724/6392/2108/1349/11315/4710/4709/128/7388/1348/4697/1347
BP	GO:0000375	RNA splicing, via transesterification reactions	238	-0.326216	-1.75876	1.2787e-06	0.000316623	0.000270807	2119	tags=35%, list=16%, signal=30%	10236/6633/10465/58155/6636/10150/11193/1655/91746/7072/3189/27336/8899/1653/83443/6634/11168/4236/79833/9733/8161/51319/23398/6629/55660/9589/3312/6430/83989/51340/3550/55110/6606/11017/10772/55596/3181/23451/23210/4691/51691/8487/2483/11066/11157/55015/3183/8621/2332/11171/5935/1660/96764/9879/51362/59286/10285/10179/6732/10284/10659/6434/6632/4154/6428/3190/220988/23658/22938/6635/4869/10492/2…
CC	GO:0031252	cell leading edge	351	0.339752	1.649	1.56003e-06	0.000374213	0.000320064	2843	tags=29%, list=21%, signal=23%	4650/5879/9051/1785/5829/54518/8525/3611/9780/8729/29959/60/7094/1072/7408/23647/10163/3678/9181/11151/23616/4627/832/64419/8861/7431/6277/6282/10013/57175/2319/23396/23129/2268/207/10211/5034/10235/72/51177/2185/23550/5880/1639/51466/65979/10381/51763/1729/23625/56623/54869/29780/2550/3756/3636/9260/5141/960/9368/1500/6714/6624/3746/491/11344/64411/70/7016/10044/25/10347/322/59338/199/26986/9578…
MF	GO:0004672	protein kinase activity	457	0.328807	1.64038	1.64008e-06	0.000381494	0.00032629	3553	tags=39%, list=27%, signal=30%	4215/2011/23476/4296/23031/6046/5261/7297/5315/369/8986/6195/3611/5580/818/2580/5598/2242/1436/1196/11184/10295/5127/5605/9020/7867/896/8408/3654/10922/57787/1453/3718/50488/1455/2268/25865/8536/2931/1460/10494/207/8428/816/1445/790/9344/2185/3551/25778/9641/5585/9261/9031/1198/5871/2022/10155/5579/9149/65018/2870/1025/23617/9024/613/5566/8569/5894/6199/5260/3055/8878/4342/5681/728642/10298/551/2…
CC	GO:0071556	integral component of lumenal side of endoplasmic reticulum membrane	21	0.728612	2.21348	2.03212e-06	0.000443709	0.000379503	1063	tags=48%, list=8%, signal=44%	6892/3133/972/3106/3105/3135/3107/3134/56928/811
CC	GO:0098553	lumenal side of endoplasmic reticulum membrane	21	0.728612	2.21348	2.03212e-06	0.000443709	0.000379503	1063	tags=48%, list=8%, signal=44%	6892/3133/972/3106/3105/3135/3107/3134/56928/811
BP	GO:0008380	RNA splicing	338	-0.291032	-1.63207	2.08097e-06	0.000443709	0.000379503	2119	tags=32%, list=16%, signal=28%	10236/8850/6633/10465/58155/6636/10150/80324/11193/1655/91746/23091/140890/7072/3189/27336/8899/1653/83443/6634/11168/4236/79833/9733/8161/51319/23398/6629/55660/10978/9589/1665/3312/54407/6430/83989/51340/3550/55110/10137/27097/5511/6606/11017/285672/10772/55596/3181/23451/55119/23210/25940/4691/51691/8487/56943/2483/10915/11066/9541/64121/11157/55015/3183/80746/9984/8621/2332/11171/5935/1660/96…
BP	GO:0033108	mitochondrial respiratory chain complex assembly	57	-0.511164	-2.19784	2.35429e-06	0.00048842	0.000417744	2484	tags=51%, list=19%, signal=42%	4720/51103/79133/4722/28958/4695/79072/4702/116228/4708/55863/4706/4711/4707/80224/4694/4725/10063/4700/51241/25880/4712/4698/4718/4724/4710/4709/7019/79145
MF	GO:0003954	NADH dehydrogenase activity	32	-0.625484	-2.34007	2.53003e-06	0.000511066	0.000437113	2484	tags=56%, list=19%, signal=46%	4720/4722/4695/4702/4708/4726/4711/4707/4694/4725/4700/4712/4698/4718/4724/4710/4709/4697
BP	GO:0006909	phagocytosis	212	0.377514	1.74825	2.82527e-06	0.000543802	0.000465112	3223	tags=39%, list=24%, signal=30%	5879/1785/391/1201/7409/5580/5199/11151/23616/4627/10062/9777/140885/3689/3561/23396/399687/8877/5338/2268/3385/4035/1445/5880/7305/5914/2219/55113/613/811/2207/3055/4689/9844/6556/25875/1265/3394/929/6714/4067/7410/1089/3683/29108/3601/4615/25/10347/199/3949/79767/11334/653509/717/3984/8398/8291/7879/55198/10461/1535/2621/64127/54209/311/8406/1411/80208/718/4647/55647/22918/2220/27102/7275/6850/…
BP	GO:0051301	cell division	475	-0.266889	-1.55443	2.83378e-06	0.000543802	0.000465112	2857	tags=34%, list=22%, signal=27%	8556/8243/3480/699/6711/5218/54892/64151/641/8502/8324/29072/7424/51203/79187/2037/2770/8881/29899/9055/201163/25847/259266/9928/79866/2252/7405/55142/23421/23503/27436/10600/26586/3981/983/11004/146909/8480/5899/9232/54801/6790/79184/2908/24137/701/5932/6990/1163/5228/1069/55143/6993/51652/22919/56034/5933/85458/8317/8202/23594/5921/11113/79003/6683/5586/3993/54820/900/79441/8872/5289/55660/2908…
BP	GO:0016052	carbohydrate catabolic process	130	0.440184	1.9193	2.91573e-06	0.000545881	0.00046689	2061	tags=33%, list=16%, signal=28%	5261/5315/4123/55526/226/7157/7167/2584/4967/2931/4758/3098/5834/3101/2203/6774/11182/402/4668/51341/2528/3607/5499/2821/5226/2548/5837/2720/2033/5211/64223/2760/83440/2027/51548/2592/4041/3630/2529/51422/54541/2645/5207
MF	GO:0003955	NAD(P)H dehydrogenase (quinone) activity	33	-0.618242	-2.30796	4.17627e-06	0.000763262	0.000652816	2484	tags=58%, list=19%, signal=47%	4720/4722/4695/4702/4708/84869/4726/4711/4707/4694/4725/4700/4712/4698/4718/4724/4710/4709/4697
BP	GO:0002694	regulation of leukocyte activation	489	0.314599	1.57815	4.29585e-06	0.000766859	0.000655893	2817	tags=30%, list=21%, signal=25%	7040/6688/10859/920/3133/7297/678/972/7133/7409/54440/6778/2309/60/6830/10077/90379/912/10288/2242/11151/3105/3135/6813/3635/56848/2896/10062/9473/5777/3965/1725/3659/140885/5724/3689/7805/25793/3727/3134/3718/3561/9466/2319/399687/8877/2268/1209/63925/207/6604/8289/1445/864/8741/5880/7305/8943/3566/5585/5914/51043/975/945/6601/2648/613/10524/6598/1050/7704/8456/933/11006/3916/1051/6597/64600/101…
CC	GO:0043202	lysosomal lumen	86	0.483172	1.97234	4.41957e-06	0.000771014	0.000659446	4050	tags=55%, list=31%, signal=38%	972/1200/23646/4125/5476/410/8635/1508/3425/4758/2588/6609/23400/6448/5660/2548/1509/2720/27163/2760/9672/8029/4669/138050/3073/5549/10577/63827/176/2517/4126/10437/5159/8722/2990/356/2331/2817/10855/3423/2239/411/53/3373/6948/5641/2262
BP	GO:0045785	positive regulation of cell adhesion	418	0.324508	1.61028	4.63135e-06	0.000790006	0.00067569	3228	tags=33%, list=24%, signal=26%	5879/10859/5970/9647/1785/920/3133/7297/972/54518/3611/7409/9780/54440/2309/60/3678/912/10288/11151/3105/3135/7030/8861/5777/5329/3965/1725/140885/5724/3654/3689/10370/3718/3561/9466/2319/25865/207/6604/10211/5034/8289/1445/864/2185/2525/8943/3566/1398/5914/2316/402/3728/51043/975/6601/811/10272/10524/6598/463/7704/11006/29984/960/6597/101/6714/5296/57178/6352/9092/4088/23308/6777/177/4067/6602/6…
CC	GO:0015629	actin cytoskeleton	393	0.329971	1.62318	4.89157e-06	0.000816254	0.00069814	3721	tags=37%, list=28%, signal=28%	2011/4650/5879/9051/7791/10093/5829/4046/7454/23406/3611/6709/60/1072/7408/10163/254102/11151/4627/832/2314/4542/81/226/10487/118/57175/2319/399687/64236/2268/64780/10211/10095/72/9344/11337/5880/10120/10634/7137/7136/1398/5914/2316/1729/50853/10307/7171/7205/29109/147179/3728/5579/29780/10121/56928/10398/6455/3055/9260/9948/9817/10552/1265/9368/9743/101/6714/55909/6624/440915/50807/1410/57731/11…
BP	GO:0050867	positive regulation of cell activation	337	0.341768	1.65898	6.47438e-06	0.00105158	0.000899411	2817	tags=31%, list=21%, signal=25%	7040/10859/920/3133/7297/972/6195/7409/54440/6778/2309/60/912/10288/11151/3105/3135/3635/56848/5777/3965/1725/140885/5724/3689/3727/3134/3718/3561/9466/2319/2268/63925/11027/207/6604/8289/1445/864/8741/7305/8943/3566/5914/2316/2815/51043/975/6601/10524/6598/1050/7704/11006/3916/6597/101/6714/57178/6352/9092/30009/23308/6777/6665/51293/177/353514/4067/6602/6603/1075/6469/29108/3485/3601/3592/4615/…
BP	GO:0006281	DNA repair	429	-0.269928	-1.56539	6.57578e-06	0.00105158	0.000899411	2816	tags=36%, list=21%, signal=29%	10269/5892/6879/7517/641/56897/8846/2271/55215/29072/1763/1647/7323/545/2956/7528/55274/5889/11169/64859/23198/11073/6419/7405/11198/54778/23503/55120/5422/6883/3981/4175/55218/983/5981/55193/80124/4171/8089/8850/7516/11232/9232/79184/8450/1111/5932/2073/22944/22890/7486/1069/6119/54840/55010/8317/9960/57551/1653/83443/4437/56893/4436/9100/5429/3150/5984/23201/7520/10635/2967/5980/1022/4292/675/7…
BP	GO:0010959	regulation of metal ion transport	326	0.339382	1.64754	6.72983e-06	0.00105425	0.000901696	3392	tags=35%, list=26%, signal=27%	2771/10859/1785/409/920/2280/2783/7531/8514/818/10288/53827/11151/56848/706/81/5777/6844/5371/3718/11027/207/816/3779/5987/2185/5023/2539/2316/51763/1729/80024/7439/22953/9454/2035/945/5566/3792/10768/3064/9368/3753/2946/6352/7533/3783/54923/6640/5170/353514/51393/4067/57731/3746/578/4987/79570/53826/25/3603/1908/6786/7416/3784/2645/5026/2902/11060/7009/4842/486/9478/9455/5311/2147/476/8398/4544/…
MF	GO:0008137	NADH dehydrogenase (ubiquinone) activity	29	-0.63324	-2.29251	7.00804e-06	0.00107588	0.000920193	2484	tags=62%, list=19%, signal=51%	4720/4722/4695/4702/4708/4726/4711/4707/4694/4725/4700/4712/4698/4718/4724/4710/4709/4697
BP	GO:0022407	regulation of cell-cell adhesion	406	0.321468	1.58883	7.48398e-06	0.00112641	0.000963417	2817	tags=31%, list=21%, signal=25%	7040/6688/10859/5970/9647/920/3133/7297/972/7409/9780/54440/2309/5580/60/10077/5598/912/10288/53827/11151/3105/3135/5777/5329/3965/1725/3659/140885/5724/3654/3689/7805/10370/3718/3561/9466/50488/2319/10019/207/6604/10211/8289/1445/864/2525/8943/3566/5914/51043/975/7471/6601/10272/10524/6598/7704/11006/3557/960/1051/6597/64600/101/6714/57178/6352/9092/30009/23308/6777/80762/177/27242/4067/6602/660…
MF	GO:0019003	GDP binding	60	-0.48614	-2.10708	8.06586e-06	0.00114655	0.000980639	2242	tags=43%, list=17%, signal=36%	8934/22800/5899/5908/58528/57826/9367/5912/2773/51143/54471/403/64121/4893/9364/5898/373/5862/5901/5906/6729/5634/5868/3845/6009/5873
BP	GO:0002534	cytokine production involved in inflammatory response	44	0.579651	2.09349	8.0328e-06	0.00114655	0.000980639	2728	tags=50%, list=21%, signal=40%	63940/79004/23646/23633/215/64170/140885/8314/6774/84818/11006/7850/240/29108/4615/923/2147/347/55198/2048/64127/54209
BP	GO:1900015	regulation of cytokine production involved in inflammatory response	44	0.579651	2.09349	8.0328e-06	0.00114655	0.000980639	2728	tags=50%, list=21%, signal=40%	63940/79004/23646/23633/215/64170/140885/8314/6774/84818/11006/7850/240/29108/4615/923/2147/347/55198/2048/64127/54209
BP	GO:0016072	rRNA metabolic process	199	-0.322199	-1.69682	1.10329e-05	0.00153979	0.00131698	2113	tags=48%, list=16%, signal=41%	9188/51504/55164/11056/23076/9277/55661/6232/4736/79039/10171/26156/23195/23212/6218/6202/10799/6135/23016/55759/1736/10412/51575/55299/54680/9790/57602/55006/65080/84549/51106/6217/55035/23404/8850/92342/27292/9330/29063/8780/6201/2091/9326/25983/10813/79979/10927/112479/29102/6125/10556/5591/6223/55720/55636/10885/6208/51096/4691/29081/5303/2483/11224/10775/6155/51441/10969/11157/8886/6129/2592…
CC	GO:0000793	condensed chromosome	198	-0.326898	-1.71531	1.12868e-05	0.0015471	0.00132323	3205	tags=43%, list=24%, signal=33%	3192/9183/10111/23310/2491/10128/55839/57405/81565/8243/699/54892/64151/641/79019/23291/55274/4288/26039/11073/57122/6419/23421/3981/11004/55193/84516/79682/8850/701/7272/1111/6990/51652/8655/10671/79003/7514/54820/4659/29082/7175/4292/7153/675/64769/55746/25978/7756/3148/27243/3364/55055/51164/23122/9126/51143/891/25909/86/4999/81929/79023/11144/10592/11130/5885/10051/23219/5501/6605/9184/8467/5…
BP	GO:0009060	aerobic respiration	134	-0.367718	-1.83957	1.14984e-05	0.00154845	0.00132439	2516	tags=43%, list=19%, signal=35%	1355/664/4720/51103/27069/4722/983/9650/4695/80025/1329/1337/3417/1350/4436/23530/4702/4708/8803/4726/29103/1340/8801/4706/1345/4711/4190/205/4707/538/3658/891/9167/29796/4694/4725/6391/54205/1738/79736/7385/4700/7381/4712/4698/4718/4724/5162/6392/1349/11315/4710/4709/7388/1348/4697/1347
BP	GO:0022604	regulation of cell morphogenesis	251	0.358343	1.7063	1.2821e-05	0.00166804	0.00142667	3144	tags=32%, list=24%, signal=25%	2011/5879/1785/23654/752/391/3611/116985/1072/2242/11151/4627/832/1436/81/226/64218/3689/57175/23129/2268/23316/816/5034/51177/9344/2185/29882/5880/388/1398/2316/1729/389/29780/2035/811/1523/3055/10507/29984/9948/960/23268/9820/9368/57154/6714/64411/7016/25/9203/23580/50848/5063/1857/54509/8829/5365/10435/1856/2147/2909/127833/7940/2048/8874/1605/7429/23237/5789/11135/2335/2043/10458/2039/5318/13…
BP	GO:0034470	ncRNA processing	305	-0.296588	-1.64352	1.26452e-05	0.00166804	0.00142667	2055	tags=44%, list=16%, signal=38%	9277/55661/6232/4736/79039/10171/26156/23195/152992/2926/51493/23212/6218/6202/10799/6135/23016/55759/1736/10412/51575/54482/8575/22916/55299/54680/10269/54517/9790/8846/57602/55006/79753/65080/84549/51106/6217/55035/23404/60487/192670/55656/339175/8850/92342/55039/80324/27292/64172/79693/29063/1655/8780/6201/2091/9326/25983/1653/10813/57117/9836/79828/23369/1787/79979/10978/7257/112479/29102/612…
BP	GO:0008360	regulation of cell shape	126	0.427411	1.85533	1.41355e-05	0.00180841	0.00154673	2951	tags=37%, list=22%, signal=29%	2011/5879/23654/752/391/116985/2242/11151/4627/1436/226/64218/3689/23129/2268/51177/9344/2185/5880/388/1398/1729/389/29780/2035/3055/10507/29984/9948/23268/9368/64411/23580/50848/54509/5365/10435/2147/2909/7940/1605/7429/11135/2335/10458/2039
MF	GO:0050136	NADH dehydrogenase (quinone) activity	30	-0.627864	-2.30496	1.45123e-05	0.00182467	0.00156064	2484	tags=60%, list=19%, signal=49%	4720/4722/4695/4702/4708/4726/4711/4707/4694/4725/4700/4712/4698/4718/4724/4710/4709/4697
BP	GO:0006120	mitochondrial electron transport, NADH to ubiquinone	38	-0.573415	-2.24437	1.51732e-05	0.00182467	0.00156064	2484	tags=68%, list=19%, signal=56%	4717/6622/23479/4720/51103/4722/4695/4702/4708/4726/29103/4706/4711/4707/4694/4725/1738/4700/4712/4698/4718/4724/11315/4710/4709/4697
MF	GO:0032393	MHC class I receptor activity	17	0.750272	2.14956	1.51575e-05	0.00182467	0.00156064	1520	tags=47%, list=11%, signal=42%	11025/10859/10288/79168/11027/11024/1512/353514
MF	GO:0015453	oxidoreduction-driven active transmembrane transporter activity	49	-0.516088	-2.14172	1.56889e-05	0.00182467	0.00156064	2516	tags=55%, list=19%, signal=45%	1355/4720/4722/4695/1329/1337/4702/4708/4726/1340/4711/4707/9167/29796/4694/4725/1528/4700/4712/4698/4718/4724/1349/4710/4709/7388/4697
CC	GO:0098576	lumenal side of membrane	25	0.671901	2.13546	1.56847e-05	0.00182467	0.00156064	1063	tags=44%, list=8%, signal=41%	6892/3133/972/3106/3105/3135/3107/5476/3134/56928/811
BP	GO:0002532	production of molecular mediator involved in inflammatory response	66	0.504929	1.97913	1.52429e-05	0.00182467	0.00156064	2728	tags=44%, list=21%, signal=35%	63940/79004/23646/57326/2896/653361/23633/215/64170/140885/8314/5023/3566/6774/84818/11006/4067/7850/240/3630/29108/4615/923/2147/347/55198/2048/64127/54209
BP	GO:0010257	NADH dehydrogenase complex assembly	39	-0.562706	-2.2002	1.68455e-05	0.001874	0.00160282	2484	tags=56%, list=19%, signal=46%	4720/51103/79133/4722/4695/4702/4708/55863/4706/4711/4707/80224/4694/4725/4700/25880/4712/4698/4718/4724/4710/4709
BP	GO:0032981	mitochondrial respiratory chain complex I assembly	39	-0.562706	-2.2002	1.68455e-05	0.001874	0.00160282	2484	tags=56%, list=19%, signal=46%	4720/51103/79133/4722/4695/4702/4708/55863/4706/4711/4707/80224/4694/4725/4700/25880/4712/4698/4718/4724/4710/4709
BP	GO:0019318	hexose metabolic process	189	0.379224	1.7331	1.64414e-05	0.001874	0.00160282	2488	tags=33%, list=19%, signal=27%	5261/5315/4123/51094/1196/4125/60343/10295/226/7157/7167/5106/92579/5091/7355/2584/2931/207/3098/6576/3101/2203/2539/23038/2528/3607/2821/2548/2648/27232/3636/2720/2033/5211/1642/6097/51547/6714/83440/4122/2027/51548/2592/4041/3630/9563/5164/2529/231/51181/3784/5373/3486/2645/5207/3170/3481/6794/5372/2517/347/8660
BP	GO:0002263	cell activation involved in immune response	238	0.36093	1.70432	1.74708e-05	0.00188882	0.0016155	1806	tags=26%, list=14%, signal=23%	7040/6688/10859/3383/972/54518/6778/8729/6830/2242/11151/6813/56848/2896/5293/5971/5777/6844/7157/3965/64218/5724/3689/2067/3134/3718/9466/2268/11027/4035/4242/2185/8741/5880/7305/3566/6774/3570/5914/51043/975/5730/22904/602/613/2207/6556/3916/6097/3394/30009/5170/80762/10538/4067/4063/6482/3683/3955/29108/4615/25
CC	GO:0005743	mitochondrial inner membrane	307	-0.286825	-1.59552	1.74205e-05	0.00188882	0.0016155	2357	tags=32%, list=18%, signal=27%	27069/79133/8034/4722/28958/55037/23107/4695/64976/51660/51021/51318/1329/1337/7298/1350/54927/55972/55186/28957/2110/51373/23530/4702/116228/51023/9801/5321/4708/100287932/55863/57380/54968/29093/4726/29103/1340/4706/3945/1345/4711/55052/54148/8604/4707/28977/9167/29796/139322/55750/122704/3032/4694/4725/7818/6391/10884/28998/1371/51650/54205/26521/29074/3329/7385/4700/78988/10240/10845/51241/73…
BP	GO:0045333	cellular respiration	163	-0.346423	-1.77516	2.02921e-05	0.00216337	0.00185032	2550	tags=40%, list=19%, signal=33%	201163/1355/664/4720/51103/27069/4722/983/9650/4695/11232/80025/5290/1329/1337/3417/1350/2110/23369/4436/23530/4702/4708/8803/4726/29103/1340/8801/4706/1345/4711/4190/8604/205/4707/538/3658/891/9167/29796/4694/4725/6391/54205/1738/79736/7385/4700/7381/80219/4712/4698/4718/4724/5162/6392/2108/1349/11315/4710/4709/7388/1348/4697/1347
MF	GO:0003779	actin binding	348	0.328345	1.59268	2.22354e-05	0.00231223	0.00197764	2855	tags=29%, list=22%, signal=23%	4650/9051/10093/752/4046/7454/23406/6709/5216/7094/1072/7408/10163/53827/11151/4627/832/2314/4542/81/226/10487/10013/118/65108/57175/399687/64236/64780/10095/816/5034/51466/65979/10634/7137/7136/2316/1729/50853/7171/54869/29109/147179/5339/29780/2035/7145/23623/3636/79585/9260/9948/10552/54784/1265/64601/7533/54961/6624/6876/6640/57731/11344/9275/64423/55201/881/25/80179/79778/25802/199/84951/195…
CC	GO:0005925	focal adhesion	377	0.323149	1.5834	2.22909e-05	0.00231223	0.00197764	1484	tags=22%, list=11%, signal=20%	527/5879/7791/1785/5829/3383/54518/391/2783/7531/3611/7529/5216/60/7094/1072/7408/2580/3678/823/9181/2242/4627/2535/2314/3660/81/5605/7431/5329/10487/3689/118/57175/2319/23396/10211/23092/10095/5034/4035/2185/3159/7106/5880/51466/388/6522/2316/402/23385/56623/10174/7171/7205/2022/3728/5339/975/5094/29780/5297/7145/811/726/3055/5817/9815/9260/23768/10525/960/10298/1465/1265/6143/247/6714/5296/8321…
BP	GO:1903131	mononuclear cell differentiation	401	0.317031	1.56241	2.34538e-05	0.00240042	0.00205307	2780	tags=30%, list=21%, signal=24%	10312/6688/10859/920/678/972/7409/54440/6778/2309/4066/60/912/3106/10288/2242/10945/4627/3135/3635/4055/1436/4772/5293/5971/5777/2874/7157/3965/64218/3659/25793/3718/3561/1209/23598/6604/8289/4242/864/2185/7226/10014/8943/3566/6774/3570/5914/56998/3665/51341/51043/7471/602/6601/2648/2207/10524/6598/2033/7704/8456/11006/1051/6097/6597/3394/101/22985/5296/57178/9092/11005/30009/6777/80762/177/10538…
CC	GO:0005884	actin filament	94	0.463222	1.91286	2.5465e-05	0.00257196	0.00219979	2951	tags=37%, list=22%, signal=29%	2011/4650/5879/9051/7454/23406/60/254102/11151/57175/64236/5880/10634/1729/7171/147179/3055/9260/9817/6714/440915/57731/11344/70/25802/199/8976/23384/58/3059/6525/87/1809/89/2039
CC	GO:0005747	mitochondrial respiratory chain complex I	33	-0.590146	-2.20308	2.81606e-05	0.0026361	0.00225465	2484	tags=61%, list=19%, signal=49%	4720/51103/4722/4695/4702/4708/4726/4706/4711/4707/4694/4725/4700/4712/4698/4718/4724/4710/4709/4697
CC	GO:0030964	NADH dehydrogenase complex	33	-0.590146	-2.20308	2.81606e-05	0.0026361	0.00225465	2484	tags=61%, list=19%, signal=49%	4720/51103/4722/4695/4702/4708/4726/4706/4711/4707/4694/4725/4700/4712/4698/4718/4724/4710/4709/4697
CC	GO:0045271	respiratory chain complex I	33	-0.590146	-2.20308	2.81606e-05	0.0026361	0.00225465	2484	tags=61%, list=19%, signal=49%	4720/51103/4722/4695/4702/4708/4726/4706/4711/4707/4694/4725/4700/4712/4698/4718/4724/4710/4709/4697
MF	GO:0042287	MHC protein binding	25	0.65961	2.0964	2.75564e-05	0.0026361	0.00225465	2128	tags=44%, list=16%, signal=37%	6892/10859/920/3133/972/10288/29992/975/10383/203068/3809
BP	GO:0019216	regulation of lipid metabolic process	274	0.346023	1.65734	2.67099e-05	0.0026361	0.00225465	3551	tags=37%, list=27%, signal=28%	4790/7040/972/8525/5580/51094/57104/60343/56848/10062/706/2874/11331/215/10273/79143/22937/8877/7376/2268/64784/5447/207/2185/23399/79888/7536/23038/5660/37/29956/975/26119/5525/10524/6720/64223/8897/8396/58526/6097/551/6714/6777/55294/27120/4067/51548/2246/7410/23175/3630/9563/5164/6770/10347/51422/344/3949/9619/10577/51085/2147/1019/57406/116986/476/650/8398/1268/347/53345/8660/345/930/55198/65…
CC	GO:0019866	organelle inner membrane	352	-0.278158	-1.57572	2.71062e-05	0.0026361	0.00225465	2357	tags=31%, list=18%, signal=26%	27069/25972/79133/8034/4722/11342/28958/55037/23107/4695/64976/51660/51021/51318/1329/1337/5743/7298/1350/54927/55972/55186/28957/2110/51373/23530/4702/116228/26092/51023/9801/5321/4708/100287932/55863/57380/54968/29093/4726/29103/1340/4706/3945/1345/4711/55052/54148/8604/4707/4001/28977/9167/29796/139322/55750/122704/3032/4694/4725/7818/6391/3708/10884/28998/1371/51650/54205/26521/29074/3329/738…
BP	GO:2000630	positive regulation of miRNA metabolic process	46	0.548758	1.99412	2.90395e-05	0.00268563	0.00229701	1839	tags=33%, list=14%, signal=28%	4790/7040/23053/6688/5970/2309/7157/7376/6774/8061/6720/6597/6721/4088/9314
BP	GO:0002696	positive regulation of leukocyte activation	322	0.330512	1.60288	3.0224e-05	0.0027619	0.00236224	2817	tags=31%, list=21%, signal=25%	7040/10859/920/3133/7297/972/7409/54440/6778/2309/60/912/10288/11151/3105/3135/3635/56848/5777/3965/1725/140885/5724/3689/3727/3134/3718/3561/9466/2319/2268/63925/207/6604/8289/1445/864/8741/7305/8943/3566/5914/51043/975/6601/10524/6598/1050/7704/11006/3916/6597/101/6714/57178/6352/9092/30009/23308/6777/51293/177/4067/6602/6603/1075/6469/29108/3485/3601/3592/4615/25/199/1947/2736/923/8744/100/348…
BP	GO:0002716	negative regulation of natural killer cell mediated immunity	18	0.722459	2.10218	3.09317e-05	0.00279332	0.00238912	807	tags=50%, list=6%, signal=47%	10859/409/3133/3106/3105/3135/3965/3134/1398
BP	GO:0035303	regulation of dephosphorylation	101	0.438834	1.82681	3.50403e-05	0.00312755	0.00267498	1953	tags=33%, list=15%, signal=28%	7040/2771/2280/7531/7529/5580/10288/6992/5725/22870/9701/1460/3551/6609/8189/9887/51763/80279/65018/945/5525/10507/8897/3064/6714/4088/26051/23645/23381/23175/1408/5528/5300
CC	GO:0005681	spliceosomal complex	151	-0.344254	-1.73685	3.96966e-05	0.00350242	0.00299561	2296	tags=40%, list=17%, signal=34%	51690/8539/9939/10236/6633/10465/58155/6636/11193/1655/140890/3189/27336/8899/83443/6634/4236/50804/23398/6629/55660/1665/3312/51340/3550/55110/5511/55596/3181/23451/55119/4691/51691/8487/2483/11066/11157/55015/3183/5935/9879/51362/10285/6434/6632/3190/220988/23658/22938/6635/10492/25949/6426/27258/8458/8559/10286/6009/55696/6637/4116
BP	GO:0002703	regulation of leukocyte mediated immunity	199	0.359639	1.65324	4.13107e-05	0.00360342	0.00308199	1551	tags=23%, list=12%, signal=20%	7040/6688/10859/409/3133/3383/7454/7133/7409/54440/6778/6830/912/3106/2242/3105/3135/6813/56848/5777/3965/5724/3689/3134/3718/9466/2268/10865/8741/5880/7305/3566/1398/975/613/5817/11006/3916/30009/3263/6777/5170/80762/177/4067
BP	GO:0002366	leukocyte activation involved in immune response	235	0.354222	1.66878	4.29754e-05	0.0037065	0.00317016	1806	tags=26%, list=14%, signal=22%	7040/6688/10859/3383/972/54518/6778/6830/2242/11151/6813/56848/2896/5293/5971/5777/6844/7157/3965/64218/5724/3689/2067/3134/3718/9466/2268/11027/4242/2185/8741/5880/7305/3566/6774/3570/5914/51043/975/5730/22904/602/613/2207/6556/3916/6097/3394/30009/5170/80762/10538/4067/4063/6482/3683/3955/29108/4615/25
BP	GO:0042273	ribosomal large subunit biogenesis	61	-0.473458	-2.06412	4.45695e-05	0.00375951	0.0032155	1452	tags=38%, list=11%, signal=34%	6125/6128/22868/55052/54955/11224/10969/8886/6129/51388/6169/6165/55003/51018/55319/6130/4869/23560/80135/51121/51187/9045/6152
BP	GO:0032102	negative regulation of response to external stimulus	330	0.324319	1.57685	4.41622e-05	0.00375951	0.0032155	3891	tags=38%, list=29%, signal=28%	4790/10859/409/3133/59307/79890/7132/7133/5580/5598/3106/3105/3135/58509/60343/2896/10062/5329/2874/3965/64218/140885/3134/57175/7376/2268/10019/22933/2950/11027/23170/55666/6773/8815/79671/1398/79651/29956/5094/5045/613/84243/3055/10507/9037/81858/6714/11005/4088/63906/80762/4067/54910/5176/57556/240/4795/3630/9314/5340/199/23005/4852/2895/11240/3949/7128/8829/79132/100/2853/57680/2147/29937/287…
MF	GO:0016655	oxidoreductase activity, acting on NAD(P)H, quinone or similar compound as acceptor	43	-0.538731	-2.17709	4.59232e-05	0.00379404	0.00324503	1597	tags=49%, list=12%, signal=43%	4720/4722/4695/4702/4708/84869/4726/4711/4707/1429/4694/4725/4700/9946/4712/4698/4718/4724/4710/4709/4697
BP	GO:0022409	positive regulation of cell-cell adhesion	281	0.337837	1.61692	4.59674e-05	0.00379404	0.00324503	2257	tags=28%, list=17%, signal=24%	10859/5970/920/3133/7297/972/7409/9780/54440/2309/60/912/10288/11151/3105/3135/5777/5329/3965/1725/140885/5724/3654/3689/10370/3718/3561/9466/2319/207/6604/10211/8289/1445/864/2525/8943/3566/5914/51043/975/6601/10272/10524/6598/7704/11006/960/6597/101/6714/57178/6352/9092/23308/6777/177/4067/6602/6603/6469/240/29108/3485/3592/25/50848/2529/199/1947/2736/3170/923/8744/100/3481/27/655
BP	GO:0001818	negative regulation of cytokine production	234	0.353126	1.66316	4.65851e-05	0.00380412	0.00325365	2827	tags=34%, list=21%, signal=27%	4790/7040/5879/10859/409/54476/59307/8986/79004/3635/58509/5971/706/5777/215/3965/5371/140885/6992/7805/3134/3718/9466/2950/1445/5987/55666/7305/51564/8815/79671/5914/9454/5045/602/945/10524/6556/11006/10270/30009/63906/80762/177/353514/3623/27242/7850/10365/1649/4795/29108/3592/9314/408/23005/7128/3440/9683/11334/79132/3625/9455/2147/3162/347/7356/55198/10461/2621/2048/5443/3620/3123/8288/64127/…
BP	GO:0045953	negative regulation of natural killer cell mediated cytotoxicity	17	0.72897	2.08853	4.72084e-05	0.00381036	0.00325899	807	tags=53%, list=6%, signal=50%	10859/409/3133/3106/3105/3135/3965/3134/1398
MF	GO:0032396	inhibitory MHC class I receptor activity	12	0.7833	2.02408	4.77648e-05	0.00381036	0.00325899	1520	tags=58%, list=11%, signal=52%	11025/10859/10288/79168/11027/11024/353514
MF	GO:0003823	antigen binding	65	0.498603	1.94045	4.83771e-05	0.00381036	0.00325899	923	tags=23%, list=7%, signal=22%	7040/6892/3133/912/3106/3105/3135/3107/140885/5518/3134/11027/7106/11024/2219
BP	GO:0006914	autophagy	415	0.310286	1.53801	4.91436e-05	0.00381036	0.00325899	2255	tags=30%, list=17%, signal=25%	2011/527/23241/10312/11152/1201/11140/2309/738/23265/3587/23647/823/1611/8131/64419/5476/5127/706/6829/11331/9146/7157/84148/8408/10273/57192/10013/25793/8517/10670/7942/79720/2931/22933/207/23367/10919/51368/5987/1981/11337/23400/53373/7249/9682/6774/550/9776/23192/826/10075/51160/5660/79735/2801/81876/54472/6625/9114/3607/10287/65018/2548/5566/1509/8878/27183/10524/6720/79643/2033/64223/8897/30…
BP	GO:0061919	process utilizing autophagic mechanism	415	0.310286	1.53801	4.91436e-05	0.00381036	0.00325899	2255	tags=30%, list=17%, signal=25%	2011/527/23241/10312/11152/1201/11140/2309/738/23265/3587/23647/823/1611/8131/64419/5476/5127/706/6829/11331/9146/7157/84148/8408/10273/57192/10013/25793/8517/10670/7942/79720/2931/22933/207/23367/10919/51368/5987/1981/11337/23400/53373/7249/9682/6774/550/9776/23192/826/10075/51160/5660/79735/2801/81876/54472/6625/9114/3607/10287/65018/2548/5566/1509/8878/27183/10524/6720/79643/2033/64223/8897/30…
CC	GO:0030055	cell-substrate junction	384	0.317945	1.5606	5.35223e-05	0.00410837	0.00351388	1484	tags=22%, list=11%, signal=20%	527/5879/7791/1785/5829/3383/54518/391/2783/7531/3611/7529/5216/60/7094/1072/7408/2580/3678/823/9181/2242/4627/2535/2314/3660/81/5605/7431/5329/10487/3689/118/57175/2319/23396/10211/23092/10095/5034/4035/2185/3159/7106/5880/51466/388/6522/2316/402/23385/56623/10174/7171/7205/2022/3728/5339/975/5094/29780/5297/7145/811/726/3055/5817/9815/9260/23768/10525/960/10298/1465/1265/6143/247/6714/5296/8321…
BP	GO:0002697	regulation of immune effector process	314	0.328865	1.59066	5.49681e-05	0.00413662	0.00353804	1551	tags=21%, list=12%, signal=19%	7040/6688/10859/409/3133/3383/972/7454/7133/7409/54440/6778/79004/6830/5199/912/3106/2242/3105/3135/6813/56848/2896/653361/5777/11331/64170/3965/5724/3689/7805/3134/3718/9466/399687/2268/10865/3098/8741/5880/7305/3566/5585/9261/79671/1398/5914/2219/2821/51043/975/613/5817/933/11006/3916/11005/30009/2865/3263/6777/5170/80762/177/10538/10392/4067
BP	GO:0051249	regulation of lymphocyte activation	417	0.308021	1.52686	5.48505e-05	0.00413662	0.00353804	2717	tags=29%, list=21%, signal=24%	7040/10859/920/3133/7297/678/972/7133/7409/54440/6778/2309/60/6830/10077/90379/912/10288/11151/3105/3135/3635/9473/5777/3965/1725/3659/140885/7805/25793/3134/3718/3561/9466/2319/2268/1209/63925/207/6604/8289/1445/864/8741/5880/7305/8943/3566/5585/5914/51043/975/6601/2648/10524/6598/7704/8456/933/11006/3916/1051/6597/64600/101/6714/57178/6352/9092/11005/30009/23308/6777/80762/51293/177/10538/3623/…
BP	GO:0006413	translational initiation	100	-0.390473	-1.8559	5.56212e-05	0.00414513	0.00354532	2986	tags=44%, list=23%, signal=34%	1979/22916/4528/8846/51386/8892/10959/55024/10605/8667/3646/8672/1967/1653/10289/8872/6193/7175/28969/6451/1974/9451/5436/5611/6198/6189/51441/6059/9689/2332/1965/8669/54505/9470/28985/4690/10987/6188/1964/8562/4869/10480/1977/253943
BP	GO:0042776	proton motive force-driven mitochondrial ATP synthesis	36	-0.553919	-2.13796	5.87475e-05	0.00433602	0.00370859	2484	tags=56%, list=19%, signal=45%	4720/4722/4695/4702/4708/4726/4706/4711/4707/4694/4725/6391/4700/4712/4698/4718/4724/6392/4710/4709
BP	GO:0002443	leukocyte mediated immunity	336	0.32371	1.57108	5.9932e-05	0.00438132	0.00374733	1667	tags=21%, list=13%, signal=18%	7040/10312/6688/10859/409/3133/3383/972/7454/7133/7409/54440/6778/127544/5580/6830/912/3106/2242/11151/3105/3135/6813/3635/56848/5293/23207/5777/6844/64170/3965/5724/3689/2067/3134/3718/9466/2268/10865/8741/5880/7305/3566/1398/1512/3665/975/5730/602/713/613/2207/3004/5817/11006/9948/3916/10383/30009/3263/6777/5170/80762/177/10538/4067/1075/203068/10747
BP	GO:0007015	actin filament organization	343	0.323443	1.57008	6.2536e-05	0.00452855	0.00387326	2855	tags=29%, list=22%, signal=24%	5879/9051/7791/9647/10093/5829/7454/391/23406/116985/5580/6709/5216/1072/7408/23647/10163/9181/11151/23616/253980/832/2314/4542/226/118/65108/57175/64780/10095/5987/2185/5880/51466/10634/388/2316/51763/1729/50853/389/10174/7171/29109/5339/3055/3636/79585/55114/9844/64223/29984/9037/9948/10552/26999/6714/5296/55909/54961/6624/4088/57731/11344/70/7016/29108/25/23580/50848/5063/80179/408/79778/25802…
BP	GO:0046939	nucleotide phosphorylation	86	0.451634	1.8436	6.57451e-05	0.00468795	0.00400959	2061	tags=34%, list=16%, signal=29%	5315/55526/226/7167/4832/2584/4967/3098/3101/2203/4833/6774/11182/402/51341/3607/2821/2033/5211/64223/11284/83440/2027/51548/3630/51422/54541/2645/5207
MF	GO:0004674	protein serine/threonine kinase activity	340	0.320816	1.55773	6.59587e-05	0.00468795	0.00400959	3262	tags=36%, list=25%, signal=28%	4215/2011/23476/4296/23031/6046/5261/369/8986/6195/3611/5580/818/2580/5598/1196/11184/10295/5127/5605/9020/7867/896/8408/3654/10922/57787/1453/50488/1455/25865/8536/2931/1460/10494/207/8428/816/9344/2185/3551/25778/9641/5585/9261/1198/5871/2022/5579/9149/65018/2870/1025/23617/9024/613/5566/8569/5894/6199/5260/8878/4342/5681/728642/10298/2872/10188/5256/5170/54101/23387/166614/7016/7204/5604/5616/…
MF	GO:0043021	ribonucleoprotein complex binding	117	-0.369695	-1.79773	6.83413e-05	0.00481273	0.00411632	2193	tags=34%, list=17%, signal=29%	55037/23107/10465/64135/1655/79139/11052/79612/29789/10289/2107/10952/79048/27067/6059/26046/2332/11171/1965/5935/55106/1660/80155/54505/51068/9728/6632/22849/6729/55319/9147/26135/6726/23480/57003/54499/4869/23560/6637/253943
BP	GO:0002250	adaptive immune response	388	0.313414	1.53728	7.55867e-05	0.00527458	0.00451133	2769	tags=27%, list=21%, signal=22%	7040/10312/11025/10859/920/3133/3383/7297/972/7454/7133/54440/6778/127544/5580/6830/912/81622/3106/10288/3105/3135/3635/3107/7030/6494/5293/5971/5777/64170/64218/3659/57192/79168/2067/3134/3718/9466/7942/25865/10865/1445/5987/2185/8741/11024/3566/6774/5585/3570/1512/3665/5579/51043/975/602/713/2207/3004/5817/6556/11006/4791/6097/30009/54923/3263/23308/80762/177/10538/27242/4067/4063/1075/10747/29…
CC	GO:0030027	lamellipodium	170	0.382622	1.72723	8.18154e-05	0.00565779	0.0048391	2674	tags=31%, list=20%, signal=25%	4650/5879/9051/1785/5829/54518/8525/3611/9780/29959/60/1072/7408/10163/11151/23616/832/57175/2319/23129/207/10211/5034/72/2185/5880/51466/65979/10381/23625/29780/3636/960/1500/6624/11344/64411/70/7016/322/199/26986/9578/8976/54434/58/5311/3984/6548/822/8874/1605/7429
CC	GO:0005751	mitochondrial respiratory chain complex IV	18	-0.679657	-2.15146	8.38438e-05	0.00569544	0.0048713	1969	tags=61%, list=15%, signal=52%	1329/1337/1350/1340/1345/9167/7385/1349/1348/4697/1347
CC	GO:0045277	respiratory chain complex IV	18	-0.679657	-2.15146	8.38438e-05	0.00569544	0.0048713	1969	tags=61%, list=15%, signal=52%	1329/1337/1350/1340/1345/9167/7385/1349/1348/4697/1347
MF	GO:0004683	calmodulin-dependent protein kinase activity	22	0.658255	2.02791	8.63307e-05	0.00581293	0.00497179	3337	tags=73%, list=25%, signal=54%	5261/818/7867/8536/816/2185/9261/8569/5260/2872/5256/1612/8550/814/10645/57172
BP	GO:0046777	protein autophosphorylation	193	0.364036	1.66733	8.94918e-05	0.00597338	0.00510902	3251	tags=38%, list=25%, signal=29%	4215/2011/4296/2242/1436/1196/11184/5605/7867/8408/3654/50488/2268/25865/5526/10494/207/8428/816/1445/790/9344/2185/23400/9261/9776/1198/2022/9961/10155/9149/65018/23617/5566/8569/3055/4342/2872/6714/780/5170/4067/2047/7016/3630/25/4294/4058/6793/1612/23604/2050/1956/22853/6794/8550/814/3932/11261/7070/60673/2043/5595/5159/27102/8737/6850/5582/9770/2041/22848/10645/7301/150094
BP	GO:0000422	autophagy of mitochondrion	74	0.474137	1.89102	9.14037e-05	0.00599671	0.00512897	2069	tags=42%, list=16%, signal=36%	2011/11152/11140/23647/706/11331/7157/8408/10013/25793/2931/11337/23400/7249/9776/23192/10075/65018/8878/6720/3064/6721/51024/55294/23130/79065/27429/1459/7416/26100/9927
BP	GO:0061726	mitochondrion disassembly	74	0.474137	1.89102	9.14037e-05	0.00599671	0.00512897	2069	tags=42%, list=16%, signal=36%	2011/11152/11140/23647/706/11331/7157/8408/10013/25793/2931/11337/23400/7249/9776/23192/10075/65018/8878/6720/3064/6721/51024/55294/23130/79065/27429/1459/7416/26100/9927
BP	GO:0018212	peptidyl-tyrosine modification	326	0.320884	1.55774	9.36504e-05	0.00609204	0.0052105	3581	tags=35%, list=27%, signal=26%	7040/409/920/7297/972/5315/7132/5580/3678/9181/2242/3297/1436/1196/84619/653361/5605/5777/7157/3689/9094/5518/3718/2268/10019/5526/1445/2185/25778/3570/9031/1198/9961/6464/9149/975/613/3055/79643/10507/64223/11006/960/9640/10188/6714/6352/780/3263/55294/353514/4067/2047/9361/7016/5604/3592/25/4058/51704/23568/2050/1956/3440/8829/640/3481/27/1856/3059/1442/2688/1119/654/10461/9148/2051/2621/2048/3…
BP	GO:0031348	negative regulation of defense response	196	0.359408	1.64984	9.59023e-05	0.00613455	0.00524687	3291	tags=38%, list=25%, signal=29%	4790/10859/409/3133/7132/7133/5580/5598/3106/3105/3135/58509/60343/2896/10062/2874/3965/140885/3134/7376/2268/22933/2950/23170/55666/6773/8815/79671/1398/79651/5094/5045/613/84243/3055/81858/6714/11005/4088/63906/80762/4067/5176/240/3630/9314/23005/4852/3949/7128/79132/100/2853/2876/3805/6895/3123/64127/54209/103/6737/313/25939/64838/56833/100507436/6850/2852/335/7301/710/27293/1813/23609/2671
BP	GO:0010975	regulation of neuron projection development	365	0.315402	1.53923	9.52092e-05	0.00613455	0.00524687	3601	tags=34%, list=27%, signal=25%	2011/23654/8175/818/1072/2580/10498/2242/64689/393/2896/10300/5605/7431/64218/8408/25793/23129/5526/8536/2931/23316/10494/207/8428/816/2185/29882/23258/23028/1398/2316/2664/23373/29956/10938/9024/1523/386724/3792/9139/5780/10507/2033/9037/9820/1400/57154/8321/7533/9638/51393/4067/54910/11344/5176/9762/57556/5604/1382/1826/25/9314/5063/4058/54606/2895/50674/8829/1002/2889/5376/6794/5365/27/655/231…
BP	GO:0042274	ribosomal small subunit biogenesis	61	-0.458436	-1.99863	0.000110451	0.0068373	0.00584793	1872	tags=39%, list=14%, signal=34%	8780/6201/25983/7520/6193/5591/6223/55720/10885/6208/11157/25926/23160/404672/57050/55127/6169/55781/6229/51077/51065/4869/6230/6227
BP	GO:0019320	hexose catabolic process	35	0.583953	1.99549	0.000110446	0.0068373	0.00584793	2943	tags=51%, list=22%, signal=40%	5315/7157/7167/2584/3098/3101/2528/3607/2720/5211/2027/2592/4041/2529/2645/572/89/2026
BP	GO:0006165	nucleoside diphosphate phosphorylation	84	0.454354	1.84756	0.000107809	0.0068373	0.00584793	2061	tags=33%, list=16%, signal=28%	5315/55526/226/7167/4832/2584/4967/3098/3101/2203/4833/6774/11182/402/51341/3607/2821/2033/5211/64223/83440/2027/51548/3630/51422/54541/2645/5207
BP	GO:0051251	positive regulation of lymphocyte activation	284	0.333849	1.60095	0.000110048	0.0068373	0.00584793	2817	tags=32%, list=21%, signal=25%	7040/10859/920/3133/7297/972/7409/54440/6778/2309/60/912/10288/11151/3105/3135/3635/5777/3965/1725/140885/3134/3718/3561/9466/2319/63925/207/6604/8289/1445/864/8741/7305/8943/3566/5914/51043/975/6601/10524/6598/7704/11006/3916/6597/101/6714/57178/6352/9092/30009/23308/6777/51293/177/4067/6602/6603/6469/29108/3485/3601/3592/4615/25/199/1947/2736/923/8744/100/3481/1026/27/23149/8660/959/2621/2048/7…
BP	GO:0071526	semaphorin-plexin signaling pathway	41	0.548205	1.9539	0.000114469	0.0070293	0.00601214	2398	tags=39%, list=18%, signal=32%	5879/23654/23616/396/64218/23129/2316/10507/9037/54910/57556/8829/5365/8828/1889/10371
BP	GO:0005996	monosaccharide metabolic process	201	0.365433	1.68494	0.000115796	0.00705437	0.00603359	2488	tags=31%, list=19%, signal=26%	5261/5315/4123/51094/1196/4125/60343/10295/226/7157/7167/5106/92579/5091/7355/2584/2931/207/3098/6576/3101/2203/2539/23038/2528/3607/2821/5226/2548/2648/27232/3636/2720/2033/5211/1642/6097/51547/6714/83440/4122/2027/51548/2592/4041/3630/9563/5164/2529/231/51181/3784/5373/3486/2645/5207/3170/3481/6794/5372/2517/347/8660
CC	GO:0101003	ficolin-1-rich granule membrane	49	0.52824	1.9426	0.000117308	0.0070902	0.00606423	1374	tags=37%, list=10%, signal=33%	527/10312/5879/79930/3687/10288/161/140885/3689/7226/1729/2548/5269/23218/2207/6556/3916/101
BP	GO:0042110	T cell activation	457	0.304076	1.517	0.000119494	0.00711038	0.00608149	2216	tags=25%, list=17%, signal=22%	10312/6688/10859/920/2280/3133/3383/7297/678/972/7454/54518/7133/7409/54440/6778/2309/60/10077/912/10288/10945/11151/3105/4627/3135/5293/5971/5777/7157/3965/896/64218/1725/3659/140885/7805/3718/3561/9466/2319/1209/23598/207/6604/8289/1445/2000/864/5880/8943/3566/6774/3570/5914/23385/51043/975/7471/602/6601/2648/2207/10524/6598/7704/8456/6556/11006/960/1051/6097/6597/64600/101/6714/5296/57178/6352…
BP	GO:0019221	cytokine-mediated signaling pathway	408	0.305549	1.51101	0.000119434	0.00711038	0.00608149	1593	tags=20%, list=12%, signal=18%	11025/6688/10859/5970/920/3661/7297/59307/972/8986/11140/7132/7133/3611/6778/2309/10554/51094/3587/1441/10288/1436/58509/10062/81/5777/2874/83483/7157/3659/28511/3654/9825/79168/7805/3718/3561/9466/10670/8877/7376/10019/2950/1460/11027/207/23170/5034/2185/3551/11024/9641/3566/6773/6774/3570/3665/54472/84818/56928/5566/2207/3055/1050/11006/3557/960/81858/6358/6714/6352/2057/3663/389856/3263/6777/3…
BP	GO:0072599	establishment of protein localization to endoplasmic reticulum	31	-0.558092	-2.06947	0.000122369	0.00719673	0.00615534	1528	tags=45%, list=12%, signal=40%	29082/10952/4121/60559/58477/9695/6727/7095/22930/6729/23471/6726/23480/9789
BP	GO:0006096	glycolytic process	74	0.469664	1.87317	0.000123758	0.00719673	0.00615534	2061	tags=35%, list=16%, signal=30%	5315/55526/226/7167/2584/4967/3098/3101/2203/6774/11182/402/51341/3607/2821/2033/5211/64223/83440/2027/51548/3630/51422/54541/2645/5207
BP	GO:0006757	ATP generation from ADP	74	0.469664	1.87317	0.000123758	0.00719673	0.00615534	2061	tags=35%, list=16%, signal=30%	5315/55526/226/7167/2584/4967/3098/3101/2203/6774/11182/402/51341/3607/2821/2033/5211/64223/83440/2027/51548/3630/51422/54541/2645/5207
CC	GO:0001931	uropod	12	0.755993	1.95351	0.000128318	0.00735049	0.00628686	589	tags=50%, list=4%, signal=48%	9051/6404/4627/2319/23396/10211
CC	GO:0031254	cell trailing edge	12	0.755993	1.95351	0.000128318	0.00735049	0.00628686	589	tags=50%, list=4%, signal=48%	9051/6404/4627/2319/23396/10211
MF	GO:0009055	electron transfer activity	97	-0.387957	-1.80926	0.000133911	0.00761274	0.00651116	1693	tags=36%, list=13%, signal=32%	1329/1337/2110/4702/4129/4708/2731/4726/51022/1340/4711/4707/6715/9167/29796/4694/4725/6391/54205/1528/4700/8560/4712/1353/4698/4718/4724/6392/2108/1349/4710/4709/128/7388/4697
BP	GO:0018108	peptidyl-tyrosine phosphorylation	324	0.322651	1.56436	0.000134879	0.00761274	0.00651116	3581	tags=35%, list=27%, signal=27%	7040/409/920/7297/972/5315/7132/5580/3678/9181/2242/3297/1436/1196/84619/653361/5605/5777/7157/3689/9094/5518/3718/2268/10019/5526/1445/2185/25778/3570/9031/1198/9961/6464/9149/975/613/3055/79643/10507/64223/11006/960/9640/10188/6714/6352/780/3263/55294/353514/4067/2047/9361/7016/5604/3592/25/4058/51704/23568/2050/1956/3440/8829/640/3481/27/1856/3059/1442/2688/1119/654/10461/9148/2051/2621/2048/3…
BP	GO:0009209	pyrimidine ribonucleoside triphosphate biosynthetic process	10	0.826753	2.0294	0.000139443	0.00781287	0.00668233	771	tags=40%, list=6%, signal=38%	54963/4832/790/4833
CC	GO:0000776	kinetochore	125	-0.350718	-1.73918	0.000145155	0.00807398	0.00690566	2856	tags=47%, list=22%, signal=37%	3192/9183/2491/55839/57405/81565/8243/699/79019/23291/55274/26039/57122/23421/11004/55193/84516/79682/8850/701/7272/6990/51652/8655/10671/79003/7514/54820/4659/29082/7175/64769/55746/25978/7756/27243/55055/51164/23122/51143/891/25909/86/4999/81929/79023/11130/23219/5501/6605/9184/55166/25936/4085/324/23279/348995/1783/51510
CC	GO:0000779	condensed chromosome, centromeric region	132	-0.345141	-1.72429	0.000148467	0.00819877	0.00701239	3205	tags=47%, list=24%, signal=36%	3192/9183/23310/2491/55839/57405/81565/8243/699/64151/79019/23291/55274/26039/57122/23421/11004/55193/84516/79682/8850/701/7272/6990/51652/8655/10671/79003/7514/54820/4659/29082/7175/64769/55746/25978/7756/27243/55055/51164/23122/51143/891/25909/86/4999/81929/79023/11130/23219/5501/6605/9184/55166/25936/4085/324/23279/348995/1783/51510/11335
BP	GO:0045834	positive regulation of lipid metabolic process	128	0.403591	1.75347	0.00015061	0.00825774	0.00706282	3837	tags=45%, list=29%, signal=32%	7040/972/8525/5580/57104/56848/10062/215/22937/7376/2268/5447/207/2185/23399/975/26119/10524/6720/64223/58526/551/6714/4067/2246/7410/3630/6770/344/3949/9619/51085/2147/57406/116986/8398/8660/930/654/23410/552/64127/11261/5159/2488/13/335/54361/208/824/2322/3357/5581/9572/64410/7124/6363/2168
BP	GO:0043632	modification-dependent macromolecule catabolic process	484	-0.24043	-1.3976	0.000153743	0.0083697	0.00715858	2503	tags=31%, list=19%, signal=26%	25847/7993/9928/51009/23404/8287/6400/8667/5682/9709/54778/5717/23358/10600/10475/8027/11342/9690/5700/6502/84669/25897/8945/857/7314/6790/8450/7326/55872/79718/9529/5516/5691/51652/1540/81847/79139/6201/23429/9960/56893/5713/7514/4534/54431/9100/7184/54941/51449/29082/9349/1499/79031/6125/9354/10952/7874/27246/7337/27252/25978/56929/6451/8453/26235/51439/4189/80196/55236/4121/26043/27243/64750/7…
CC	GO:0005868	cytoplasmic dynein complex	15	-0.70436	-2.10467	0.000163549	0.00877904	0.00750869	1967	tags=67%, list=15%, signal=57%	6990/6993/8655/83658/1781/7175/8723/51164/51143/1783
BP	GO:0051924	regulation of calcium ion transport	215	0.35341	1.64057	0.000162522	0.00877904	0.00750869	3263	tags=33%, list=25%, signal=25%	2771/10859/409/920/2280/7531/818/10288/11151/56848/706/5777/5371/3718/11027/816/5987/2185/5023/2539/51763/1729/80024/7439/22953/9454/2035/945/5566/3064/3753/2946/6352/54923/5170/353514/51393/4067/578/4987/25/3603/6786/7416/5026/2902/7009/4842/9478/9455/5311/2147/8398/6548/930/1535/7349/9495/846/274/7070/80208/3060/781/5159/9001/9914/51475/2852/786/1813
MF	GO:0051015	actin filament binding	177	0.360332	1.63513	0.000176488	0.00940779	0.00804646	2855	tags=31%, list=22%, signal=24%	4650/9051/10093/752/23406/6709/7094/1072/11151/4627/832/2314/4542/81/118/65108/57175/399687/64780/10095/10634/7137/2316/50853/7171/29109/5339/79585/9948/10552/64601/6624/6876/57731/11344/55201/881/25/80179/79778/199/1956/27/3059/6532/822/7125/87/7429/274/23164/9463/89/4647
BP	GO:0050900	leukocyte migration	339	0.316719	1.5383	0.000182374	0.0096545	0.00825747	4134	tags=38%, list=31%, signal=27%	5879/6688/63940/6404/3383/972/79890/391/7409/8729/4814/1441/11151/4627/1436/5293/728/83483/3965/140885/5724/3689/9466/23396/207/51157/2185/7226/5880/7423/3570/1398/80024/84818/5339/975/613/811/2207/3055/50512/9948/6358/1265/10894/101/6714/6352/4267/682/30009/6777/177/3579/4067/79902/240/3683/29108/3592/4615/25/3603/1908/50848/2529/55512/5340/6793/199/11240/23604/10488/8976/100/27/3162/347/4354/26…
BP	GO:0002683	negative regulation of immune system process	360	0.306288	1.49374	0.000187576	0.00986189	0.00843485	3693	tags=36%, list=28%, signal=27%	7040/11025/6688/10859/409/3133/972/79890/8525/6778/79004/10077/3106/10288/3105/3135/3635/58509/60343/2896/10062/5777/2874/3965/3659/7805/25793/3134/3718/9466/7376/2268/207/23170/5987/864/7305/3566/1831/6773/8815/5585/79671/1398/5914/79651/51043/5045/613/10272/84243/3055/1050/933/11006/1051/1265/64600/6714/11005/30009/55294/80762/3623/27242/4067/6469/3630/56834/4852/11240/3949/7128/3440/8976/79132…
BP	GO:0002715	regulation of natural killer cell mediated immunity	40	0.539247	1.90204	0.00019559	0.0102133	0.00873539	1786	tags=35%, list=13%, signal=30%	10859/409/3133/7409/3106/3105/3135/3965/3134/1398/5817/3916/6777/3592
BP	GO:0002685	regulation of leukocyte migration	198	0.353784	1.62844	0.000199662	0.0103555	0.00885699	4128	tags=41%, list=31%, signal=29%	5879/6688/63940/3383/972/79890/391/11151/1436/728/83483/3965/5724/9466/207/51157/2185/5880/7423/3570/1398/80024/975/613/811/1265/10894/101/6352/4267/177/3579/4067/29108/3592/4615/25/1908/2529/55512/6793/199/11240/23604/10488/8976/100/27/3162/347/4354/2621/1435/8764/64127/54209/11117/7070/5595/56833/1399/6484/727/8995/4478/3569/375056/4323/1240/7124/6869/6363/1893/5764/5747/5641/6366/2833/2811/874…
CC	GO:0031966	mitochondrial membrane	485	-0.24001	-1.39697	0.000201608	0.0103862	0.0088833	2602	tags=31%, list=20%, signal=26%	665/1678/23446/65080/1355/664/4720/9429/51103/26355/91137/4170/27069/79133/8034/55218/2181/4722/28958/10059/55037/23107/4695/26056/2180/80342/8443/64976/7314/51660/51021/51318/1329/51309/1337/841/7298/1350/54927/55972/9804/55186/54832/28957/2110/51373/23530/55669/4702/80777/116228/51023/4129/9801/5321/4708/28978/100287932/55863/54974/57380/54968/29093/4726/23230/29103/65084/1340/4706/3945/4891/13…
BP	GO:0005975	carbohydrate metabolic process	475	0.295359	1.47882	0.00020345	0.0104112	0.00890467	2093	tags=24%, list=16%, signal=21%	4790/7040/1431/5261/5315/4123/51172/51094/55526/25796/1196/4125/60343/10295/226/7157/7167/5724/5106/92579/5091/7355/2584/4967/2931/6520/55741/207/3425/4758/3098/23193/217/2185/5834/6576/3705/2525/3101/64847/2203/6774/2539/3421/51763/11182/402/23038/7165/3418/4668/56623/51341/2528/3607/5499/2821/8705/5973/5226/2548/5837/2648/5260/27232/3636/5016/2720/2033/5211/64223/1642/2760/2805/89944/6097/51547…
BP	GO:0006123	mitochondrial electron transport, cytochrome c to oxygen	17	-0.680123	-2.11339	0.000209788	0.0105237	0.0090009	1969	tags=71%, list=15%, signal=60%	1355/1329/1337/1350/1340/1345/9167/54205/1349/1348/4697/1347
BP	GO:0042269	regulation of natural killer cell mediated cytotoxicity	39	0.542691	1.91535	0.000215245	0.0105237	0.0090009	1786	tags=36%, list=13%, signal=31%	10859/409/3133/7409/3106/3105/3135/3965/3134/1398/5817/3916/6777/3592
BP	GO:0002228	natural killer cell mediated immunity	62	0.478294	1.8417	0.000213702	0.0105237	0.0090009	1786	tags=32%, list=13%, signal=28%	10859/409/3133/7409/127544/3106/11151/3105/3135/23207/5777/3965/3134/1398/5817/3916/10383/6777/203068/3592
BP	GO:0140053	mitochondrial gene expression	107	-0.370379	-1.77464	0.000209942	0.0105237	0.0090009	3599	tags=57%, list=27%, signal=42%	4701/28973/283459/7978/56945/63875/60493/65005/57038/10128/54516/55699/60488/4528/63931/8846/55006/65080/51106/55278/28958/55037/23107/64976/51021/80324/51318/79072/85476/79828/28957/79675/51373/51023/9801/29093/10102/22868/55052/54148/5562/28977/122704/7818/10884/28998/51650/57570/55005/79736/29074/64216/25821/78988/10240/51067/63899/11222/9238/9553/7019
BP	GO:0000075	cell cycle checkpoint signaling	148	-0.323021	-1.62221	0.000212368	0.0105237	0.0090009	3795	tags=48%, list=29%, signal=35%	26272/25988/5810/9735/1407/1063/988/8914/55795/54962/4193/2765/51514/9183/10111/57405/5629/11200/699/7517/641/1763/545/64859/11073/6419/51499/9587/983/60561/79184/701/7272/1111/5932/55872/55143/57551/4436/900/7175/675/5591/3550/7756/3364/55055/51143/891/4683/472/25896/9984/11130/54465/580/5781/9675/83990/1386/9184/8451/1027/8883/261726/4085/10116/51065/324/25949/80254
BP	GO:0098813	nuclear chromosome segregation	227	-0.291774	-1.55848	0.000207207	0.0105237	0.0090009	1528	tags=37%, list=12%, signal=33%	8243/699/7517/54892/64151/51203/8881/55274/9055/5889/9928/192670/27436/9587/11004/55193/146909/8850/9232/24137/701/7272/55143/51652/22919/79003/29082/7175/1499/4292/7153/3550/25978/7756/9787/27243/9134/55055/996/9126/8766/51143/891/472/23244/86/8697/81929/25836/11144/10592/11130/26271/5885/7155/7320/10051/83990/1894/10274/6605/9184/8467/55781/29127/5901/80010/55166/10735/51115/25936/4085/10464/32…
BP	GO:0061564	axon development	397	0.302217	1.48776	0.000215215	0.0105237	0.0090009	3938	tags=37%, list=30%, signal=26%	2011/5879/1785/23654/391/60/7408/23334/1436/393/2896/706/5605/64218/8408/6277/10013/23129/10494/10211/8428/9344/29882/5880/10381/2316/2664/29956/9024/3792/23768/10507/9037/1400/57154/27023/682/780/9638/27242/51393/57731/1267/2047/54910/11344/6469/3996/57556/55201/7204/5604/1382/1826/25/9314/8022/2290/1908/8636/5063/11313/322/4854/1947/2050/2736/22853/8829/1002/5080/7414/334/6794/5365/655/8828/231…
BP	GO:0071826	ribonucleoprotein complex subunit organization	175	-0.311893	-1.62206	0.000216737	0.0105296	0.00900592	2099	tags=34%, list=16%, signal=29%	6633/10728/58155/6636/3646/91746/27336/9326/1653/83443/6634/11168/11052/79833/9733/8161/6629/7520/10978/6193/6430/6125/51340/11051/5591/6223/6606/6128/22868/10772/55052/23451/6208/472/8487/79752/55015/11171/1660/8669/96764/9879/6169/54505/6732/3799/10659/6632/28985/23405/51065/8562/6635/6426/8559/10480/79577/6637/6152
BP	GO:0000423	mitophagy	27	0.60679	1.96505	0.000230166	0.0111117	0.00950378	2069	tags=52%, list=16%, signal=44%	11140/23647/11331/7157/10013/7249/9776/23192/10075/65018/8878/27429/7416/9927
BP	GO:1902532	negative regulation of intracellular signal transduction	401	0.301569	1.48621	0.000234467	0.0112485	0.00962084	3586	tags=35%, list=27%, signal=26%	4221/6688/5970/23636/409/972/5580/51094/5598/9181/8131/23334/23616/3135/253980/58509/5777/5329/2874/79726/140885/5518/8527/599/10019/2931/2950/4841/207/2907/10318/1445/6609/55666/2203/7249/51564/23028/598/10636/5514/79671/51763/80279/26155/55841/56623/65018/9454/23295/28952/10525/933/11006/960/26001/9368/7498/6714/5296/63906/10131/4067/2021/5037/4987/1649/64411/57556/3630/29108/27429/25/8216/1032…
MF	GO:0051219	phosphoprotein binding	82	0.441085	1.79135	0.000237807	0.0113379	0.00969729	3547	tags=54%, list=27%, signal=40%	4221/7531/5589/7409/7529/5216/5777/10670/2268/8535/63935/1398/6452/6464/26119/2035/3055/55011/6714/5296/55294/4067/7410/10044/25/5300/9967/27/5311/5327/23168/3932/10750/3482/5595/6295/407/1399/6850/582/4734/9021/8725/53358
MF	GO:0019903	protein phosphatase binding	124	0.394294	1.70739	0.000242723	0.0115009	0.00983667	3015	tags=40%, list=23%, signal=31%	10859/5829/7531/6778/10288/1436/29888/7157/140885/6992/22870/9701/3718/8877/1445/65979/9641/5514/6774/9887/9961/3728/5499/945/2648/2962/933/11006/8897/6780/5296/3783/26051/23645/23381/54976/3784/1956/286/6548/8660/3932/9495/7187/572/51231/51400/5609/55291
BP	GO:0015986	proton motive force-driven ATP synthesis	39	-0.513525	-2.00791	0.000248554	0.0117049	0.0100112	1597	tags=46%, list=12%, signal=41%	4702/4708/4726/4706/4711/4707/4694/4725/6391/4700/523/4712/4698/4718/4724/6392/4710/4709
MF	GO:0044325	transmembrane transporter binding	101	0.409955	1.70659	0.000252349	0.0118084	0.0100997	3166	tags=40%, list=24%, signal=30%	23241/2280/7531/5589/8514/706/81/2907/489/1173/2316/1729/3756/3064/3753/6714/7533/6640/4067/3746/578/488/29108/6336/7416/3784/4842/286/5311/87/846/89/288/9001/5318/5348/22999/6804/6324/55690
BP	GO:0007159	leukocyte cell-cell adhesion	348	0.309569	1.5016	0.000253829	0.0118084	0.0100997	2817	tags=30%, list=21%, signal=25%	10859/5970/920/3133/6404/3383/7297/972/7409/54440/2309/60/10077/3678/912/10288/11151/3105/3135/5777/3965/1725/3659/140885/5724/3654/3689/7805/3718/3561/9466/2319/207/6604/10318/8289/1445/864/5880/8943/3566/5914/51043/975/6601/10524/6598/50512/10507/7704/11006/960/1051/6597/64600/101/6714/57178/6352/9092/30009/23308/6777/80762/177/27242/4067/6602/6603/6469/240/3683/29108/3485/3592/25/9314/50848/25…
MF	GO:0046965	nuclear retinoid X receptor binding	15	0.71717	1.99272	0.000264467	0.0122292	0.0104596	1349	tags=53%, list=10%, signal=48%	81857/7376/10865/6867/3159/7421/9612/5916
BP	GO:0019883	antigen processing and presentation of endogenous antigen	25	0.623806	1.98261	0.000266689	0.0122581	0.0104843	466	tags=36%, list=4%, signal=35%	6892/3133/972/912/3106/3105/3135/3107/3134
BP	GO:0051276	chromosome organization	439	-0.247302	-1.43963	0.000270605	0.0123641	0.0105749	3205	tags=37%, list=24%, signal=29%	3192/5977/9183/10973/10111/49856/11339/23310/2491/55839/1736/57405/23064/57343/3834/6117/51659/5588/8091/23126/5982/8243/699/10269/5892/7517/54892/64151/641/56897/1763/51203/545/8881/10694/7528/55274/9055/5889/9928/192670/57122/6419/23421/27436/3981/4175/26054/9587/54552/983/5981/11004/55193/146909/8480/4171/8850/9232/10728/24137/701/7272/2963/7486/3149/55143/6119/51652/22919/1653/4437/167227/790…
BP	GO:1903039	positive regulation of leukocyte cell-cell adhesion	243	0.338143	1.60357	0.000277078	0.0125849	0.0107638	2817	tags=33%, list=21%, signal=26%	10859/5970/920/3133/7297/972/7409/54440/2309/60/912/10288/11151/3105/3135/5777/3965/1725/140885/5724/3654/3689/3718/3561/9466/2319/207/6604/8289/1445/864/8943/3566/5914/51043/975/6601/10524/6598/7704/11006/960/6597/101/6714/57178/6352/9092/23308/6777/177/4067/6602/6603/6469/240/29108/3485/3592/25/2529/199/1947/2736/923/8744/100/3481/27/23149/959/7048/30835/3932/3123/8764/64127/6599/7070/572
BP	GO:0035304	regulation of protein dephosphorylation	70	0.456731	1.80789	0.000279651	0.012627	0.0107999	1953	tags=34%, list=15%, signal=29%	7040/2771/2280/7531/7529/5580/10288/6992/5725/22870/9701/1460/3551/6609/8189/65018/945/5525/3064/26051/23645/1408/5528/5300
BP	GO:1903706	regulation of hemopoiesis	328	0.311645	1.51275	0.000302105	0.0135612	0.0115988	1823	tags=23%, list=14%, signal=20%	7040/11025/6688/10859/920/678/972/51621/54440/2309/60/1441/3106/10288/2242/3135/3297/3635/7030/7994/8861/5777/3965/3659/25793/3718/3561/1209/6604/8289/864/2185/7305/8943/3566/2101/6774/5914/56998/3665/51043/6601/2648/10272/10524/6598/1050/7704/8456/11006/54681/1051/6597/5916/101/22985/57178/9092/11005/30009/6777/55294/80762/177/10538/3623/4067/6602/6603/6469/3601/23522/25/56834
BP	GO:0061620	glycolytic process through glucose-6-phosphate	17	0.68826	1.9719	0.000307766	0.0136323	0.0116597	2057	tags=59%, list=16%, signal=50%	5315/7167/2584/3098/3101/3607/5211/83440/2027/2645
BP	GO:0000070	mitotic sister chromatid segregation	164	-0.314281	-1.61927	0.000309019	0.0136323	0.0116597	3205	tags=45%, list=24%, signal=35%	3192/5977/9183/49856/23310/57405/3834/23126/8243/699/7517/54892/64151/51203/8881/55274/9055/9928/27436/9587/11004/55193/146909/8850/9232/24137/701/7272/55143/51652/22919/79003/29082/7175/3550/25978/7756/9787/27243/55055/996/9126/8766/51143/891/472/23244/86/8697/81929/25836/10592/11130/26271/5885/10051/6605/9184/8467/55781/29127/5901/51115/25936/4085/10464/324/6595/23137/5925/80218/51510/23047/9525
BP	GO:0000819	sister chromatid segregation	185	-0.302699	-1.58322	0.000308647	0.0136323	0.0116597	2844	tags=39%, list=21%, signal=31%	8243/699/7517/54892/64151/51203/8881/55274/9055/5889/9928/27436/9587/11004/55193/146909/8850/9232/24137/701/7272/55143/51652/22919/79003/29082/7175/1499/7153/3550/25978/7756/9787/27243/55055/996/9126/8766/51143/891/472/23244/86/8697/81929/25836/10592/11130/26271/5885/7155/10051/10274/6605/9184/8467/55781/29127/5901/10735/51115/25936/4085/10464/324/6595/79892/23137/5925/80218/51510/23047/9525
BP	GO:1900016	negative regulation of cytokine production involved in inflammatory response	17	0.686817	1.96776	0.000326647	0.0143277	0.0122544	2728	tags=65%, list=21%, signal=51%	79004/215/140885/11006/7850/29108/2147/347/55198/2048/54209
MF	GO:0019902	phosphatase binding	157	0.377318	1.68895	0.000331367	0.0144521	0.0123609	3122	tags=39%, list=24%, signal=31%	10859/5829/7531/6778/10288/1436/29888/26133/7157/140885/6992/22870/9701/3718/8877/1445/7249/65979/9641/5514/6774/9887/9961/8178/3728/5499/945/2648/2962/933/11006/8897/6780/9368/5296/3783/4088/26051/57731/23645/1075/23381/1408/54976/3784/1956/286/6548/8660/9814/3932/9495/7187/572/51231/51400/5595/11123/5609/55291/6850/1000
BP	GO:1903054	negative regulation of extracellular matrix organization	10	0.806992	1.98089	0.000335139	0.014534	0.0124309	120	tags=40%, list=1%, signal=40%	7040/1471/7132/7133
BP	GO:1902105	regulation of leukocyte differentiation	267	0.326229	1.56128	0.000337585	0.0145579	0.0124513	3693	tags=39%, list=28%, signal=29%	7040/11025/10859/920/678/972/54440/2309/60/3106/10288/2242/3135/3297/3635/7030/5777/3965/3659/25793/3718/3561/1209/6604/8289/864/7305/8943/3566/2101/5914/56998/3665/51043/6601/2648/10272/10524/6598/7704/8456/11006/1051/6597/101/22985/57178/9092/11005/30009/6777/55294/80762/177/10538/3623/4067/6602/6603/6469/3601/25/56834/2736/3440/8744/100/3059/6988/2621/7048/1435/814/3123/652/54209/4609/6599/572…
BP	GO:0019941	modification-dependent protein catabolic process	479	-0.238979	-1.39206	0.000339648	0.014565	0.0124574	2407	tags=30%, list=18%, signal=26%	8287/6400/8667/5682/9709/54778/5717/23358/10600/10475/8027/11342/9690/5700/6502/84669/25897/8945/857/7314/6790/8450/7326/55872/79718/9529/5516/5691/51652/1540/81847/79139/6201/23429/9960/56893/5713/7514/4534/54431/9100/7184/54941/51449/29082/9349/1499/79031/6125/9354/10952/7874/27246/7337/27252/25978/56929/6451/8453/26235/51439/4189/80196/55236/4121/26043/27243/64750/7321/9861/996/4780/23304/9320…
BP	GO:0045047	protein targeting to ER	28	-0.570163	-2.05031	0.000342283	0.0145965	0.0124843	1528	tags=46%, list=12%, signal=41%	29082/10952/4121/60559/58477/9695/6727/7095/6729/23471/6726/23480/9789
BP	GO:0046365	monosaccharide catabolic process	37	0.553293	1.9141	0.000347126	0.0147212	0.012591	2943	tags=49%, list=22%, signal=38%	5315/7157/7167/2584/3098/3101/2528/3607/2720/5211/2027/2592/4041/2529/2645/572/89/2026
BP	GO:0045088	regulation of innate immune response	193	0.349076	1.59881	0.000355633	0.0149991	0.0128287	1786	tags=27%, list=13%, signal=24%	6688/10859/409/3661/3133/11140/7409/912/3106/3105/3135/58509/60343/2896/653361/10062/5777/64170/3965/3659/3134/7376/2268/11027/4841/23170/10432/3551/7305/9641/6773/8815/79671/1398/3665/2219/84243/3055/5817/2033/3916/101/6714/6352/389856/3263/6777/4067/55223/3630/29108/3592
BP	GO:0090066	regulation of anatomical structure size	417	0.29545	1.46455	0.000357815	0.0150087	0.0128369	2815	tags=28%, list=21%, signal=22%	5879/10093/1785/7454/79890/1201/23406/7409/5580/6709/5216/7408/11151/23616/832/2314/393/1874/64218/8408/118/8985/10095/3779/1185/56996/5029/2185/29882/1173/9990/23400/51466/23028/5023/2664/23038/50853/5499/10723/2166/3055/3792/10507/64223/3350/9037/9948/10552/551/9368/6928/5916/57154/26999/5296/3783/54961/6640/153/80852/51393/57731/54910/23645/146/11344/171023/10365/7410/57556/3630/1382/29108/182…
BP	GO:0006301	postreplication repair	22	-0.611037	-2.04976	0.000361065	0.0150627	0.0128831	1948	tags=55%, list=15%, signal=47%	22890/4436/9100/5429/5980/51455/7334/7398/7320/5111/25898/7336
BP	GO:0042267	natural killer cell mediated cytotoxicity	61	0.480312	1.84175	0.000366131	0.0151915	0.0129932	1786	tags=33%, list=13%, signal=28%	10859/409/3133/7409/127544/3106/11151/3105/3135/23207/5777/3965/3134/1398/5817/3916/10383/6777/203068/3592
BP	GO:0007059	chromosome segregation	272	-0.272175	-1.49049	0.000381935	0.015762	0.0134812	3205	tags=40%, list=24%, signal=31%	3192/5977/9183/49856/11339/23310/1457/55839/57405/3834/998/23126/81565/8243/699/7517/54892/64151/51203/8881/55274/9055/5889/9928/4288/192670/7405/27436/9587/11004/55193/146909/8850/9232/2908/24137/701/7272/55143/51652/8780/22919/5359/79003/23369/54820/9874/29082/7175/1499/4292/7153/3550/25978/7756/9787/27243/9134/55055/996/9126/8766/51143/891/472/23244/86/8697/81929/79023/25836/11144/10592/11130/…
MF	GO:0003682	chromatin binding	462	0.290445	1.45101	0.000390766	0.0160402	0.0137192	2620	tags=30%, list=20%, signal=25%	23476/4790/6881/4221/6688/5970/23636/6046/3661/23558/2309/60/22907/6830/5976/57658/3297/1107/1912/8019/10062/1874/23309/81/6829/8861/7157/473/2067/339287/10370/4297/7376/23523/23598/8535/22933/1460/4841/10865/10919/53615/9968/5424/8289/3159/8314/51564/6472/23028/2355/6774/5585/9112/84759/5914/1059/8648/26155/2002/84656/7343/10155/5579/5430/1108/22904/1025/23060/6601/2648/2962/23135/4904/10524/659…
BP	GO:2000628	regulation of miRNA metabolic process	63	0.469656	1.80949	0.00039972	0.0163205	0.0139589	1470	tags=27%, list=11%, signal=24%	4790/7040/23053/6688/5970/2309/7157/7376/6774/5914/8061/6720/11006/6597/6721/4775/4088
BP	GO:0015980	energy derivation by oxidation of organic compounds	235	-0.278461	-1.50162	0.000407765	0.0165608	0.0141645	2246	tags=31%, list=17%, signal=26%	4722/983/9650/4695/11232/10728/80025/5290/3953/1329/1337/3417/1350/2110/23369/4436/23530/4702/4708/3667/9852/8803/4726/29103/1340/8801/4706/1345/4711/4190/8604/205/4707/538/3658/891/9167/29796/4694/7360/4725/2673/6391/34/2632/54205/1738/79736/7385/5501/7262/5500/2998/4700/7381/80219/4712/4698/4718/4724/5162/6392/2108/1349/11315/4710/9821/4709/178/7388/1348/4697/1347
CC	GO:0005775	vacuolar lumen	150	0.371108	1.64285	0.000414957	0.0167643	0.0143384	3556	tags=41%, list=27%, signal=31%	972/1200/5580/23646/4125/2896/5476/410/10487/5036/8635/1508/3425/4758/5834/2588/6609/23400/6448/5660/54472/2548/1509/4069/2720/27163/2760/9672/10383/8029/1075/4669/203068/138050/29108/2512/3073/5549/11240/23604/10577/1727/63827/176/47/2517/1778/6317/4126/10437/718/5159/8722/2990/356/2331/2817/10855/10493/3423/2239/411
BP	GO:1902895	positive regulation of miRNA transcription	42	0.521457	1.86527	0.000422621	0.0169845	0.0145268	1839	tags=31%, list=14%, signal=27%	7040/6688/5970/2309/7157/7376/6774/8061/6720/6597/6721/4088/9314
CC	GO:0101002	ficolin-1-rich granule	166	0.360387	1.62554	0.000425779	0.0170223	0.0145591	1374	tags=27%, list=10%, signal=24%	7077/527/10312/5879/1471/79930/5315/3687/23406/823/10288/161/327/978/226/140885/3689/79792/1508/2950/1460/7226/3101/10120/10075/1675/1512/1729/2219/9961/3728/2821/2548/124583/5269/1509/23218/2207/2720/5211/6556/5265/3916/101
MF	GO:0001228	DNA-binding transcription activator activity, RNA polymerase II-specific	377	0.302319	1.48133	0.000432784	0.0172127	0.014722	3700	tags=34%, list=28%, signal=25%	4790/6688/22877/5970/27287/3661/51621/6778/2309/3297/7030/4772/10062/4782/1874/3660/6689/7157/1961/3659/1052/3727/7376/2000/51157/2355/4802/6774/100271849/2002/5326/6257/3607/51043/7629/8061/1628/6720/1050/7704/28999/8456/4791/64763/9189/171017/1051/3221/7008/4775/30009/3663/4088/6777/10538/2120/7709/2116/3164/5090/4097/1649/3211/3087/4209/63974/9314/8022/30062/4901/6663/4520/8928/1877/5309/7757/…
MF	GO:0030695	GTPase regulator activity	344	0.307148	1.4919	0.00044747	0.0176143	0.0150654	2400	tags=27%, list=18%, signal=23%	4650/6305/9922/63940/51291/9909/7454/79890/7409/116985/8729/5863/9181/8131/23616/4924/6494/9138/393/396/23061/2874/140885/9826/9744/23092/392/10235/23550/23258/54662/7249/10113/10636/84364/2664/79735/54869/9610/5900/79958/79874/613/27128/50619/55200/9815/55114/9844/3257/29984/27352/23268/9743/9771/2873/8498/10188/153/50807/23216/8567/64411/7410/3996/7204/115703/11033/89781/10044/5905/29/2776/5850…
MF	GO:0060589	nucleoside-triphosphatase regulator activity	344	0.307148	1.4919	0.00044747	0.0176143	0.0150654	2400	tags=27%, list=18%, signal=23%	4650/6305/9922/63940/51291/9909/7454/79890/7409/116985/8729/5863/9181/8131/23616/4924/6494/9138/393/396/23061/2874/140885/9826/9744/23092/392/10235/23550/23258/54662/7249/10113/10636/84364/2664/79735/54869/9610/5900/79958/79874/613/27128/50619/55200/9815/55114/9844/3257/29984/27352/23268/9743/9771/2873/8498/10188/153/50807/23216/8567/64411/7410/3996/7204/115703/11033/89781/10044/5905/29/2776/5850…
BP	GO:0007409	axonogenesis	357	0.30587	1.49068	0.000457755	0.0179272	0.0153331	3676	tags=35%, list=28%, signal=26%	2011/5879/1785/23654/391/60/7408/23334/1436/393/5605/64218/8408/6277/10013/23129/10494/10211/9344/29882/5880/10381/2664/9024/3792/23768/10507/9037/1400/57154/27023/682/9638/51393/57731/1267/2047/54910/11344/6469/3996/57556/55201/7204/5604/1382/1826/25/8022/2290/1908/8636/5063/11313/322/4854/1947/2050/2736/22853/8829/1002/5080/7414/334/6794/5365/655/8828/23105/1889/3984/4884/2909/10371/474/107/421…
BP	GO:0033046	negative regulation of sister chromatid segregation	45	-0.479943	-1.96025	0.000475871	0.0181731	0.0155434	3192	tags=56%, list=24%, signal=42%	9735/1063/55795/9183/57405/699/7517/9587/9232/701/7272/55143/7175/3550/7756/55055/51143/891/472/11130/26271/5885/9184/4085/324
BP	GO:0033048	negative regulation of mitotic sister chromatid segregation	45	-0.479943	-1.96025	0.000475871	0.0181731	0.0155434	3192	tags=56%, list=24%, signal=42%	9735/1063/55795/9183/57405/699/7517/9587/9232/701/7272/55143/7175/3550/7756/55055/51143/891/472/11130/26271/5885/9184/4085/324
BP	GO:2000816	negative regulation of mitotic sister chromatid separation	45	-0.479943	-1.96025	0.000475871	0.0181731	0.0155434	3192	tags=56%, list=24%, signal=42%	9735/1063/55795/9183/57405/699/7517/9587/9232/701/7272/55143/7175/3550/7756/55055/51143/891/472/11130/26271/5885/9184/4085/324
CC	GO:1990204	oxidoreductase complex	99	-0.356169	-1.68117	0.000468882	0.0181731	0.0155434	1597	tags=33%, list=12%, signal=30%	4702/80777/4708/84869/2731/4726/6241/8050/4706/3945/4711/4707/29796/4694/4725/6391/3939/1738/7385/6240/4700/7381/4712/4698/4718/4724/5162/6392/2108/4710/4709/7388/4697
BP	GO:0032535	regulation of cellular component size	289	0.319781	1.53903	0.000467074	0.0181731	0.0155434	2815	tags=29%, list=21%, signal=24%	5879/10093/1785/7454/79890/1201/23406/7409/5580/6709/5216/7408/11151/23616/832/2314/393/1874/64218/8408/118/10095/1185/56996/2185/29882/1173/9990/23400/51466/23028/2664/23038/50853/5499/10723/3055/3792/10507/64223/9037/9948/10552/9368/5916/57154/26999/5296/3783/54961/51393/57731/54910/23645/11344/7410/57556/1382/29108/1826/25/23580/5063/2647/11194/25802/8829/1002/54434/10435/23105/3984/2909/10371…
BP	GO:0006734	NADH metabolic process	31	0.567849	1.89333	0.000483361	0.018347	0.0156921	1503	tags=39%, list=11%, signal=34%	5315/7157/7167/5106/5091/4967/3098/3101/3607/3420/5211/2027
BP	GO:0002460	adaptive immune response based on somatic recombination of immune receptors built from immunoglobulin superfamily domains	260	0.319027	1.52561	0.000485206	0.018347	0.0156921	2230	tags=24%, list=17%, signal=21%	7040/10312/10859/920/3133/3383/7297/972/7454/7133/54440/6778/5580/6830/912/3106/3105/3135/3635/5971/5777/64170/64218/2067/3134/3718/9466/10865/8741/3566/6774/5585/3570/1512/3665/51043/975/602/713/2207/3004/5817/6556/11006/4791/6097/30009/3263/80762/177/10538/4063/1075/10747/3592/4615/2529/715/7128/3440/100/731/717
BP	GO:0070663	regulation of leukocyte proliferation	228	0.331452	1.55468	0.000492595	0.0185351	0.015853	2717	tags=31%, list=21%, signal=25%	10859/3133/7297/972/7133/54440/6778/10077/912/10288/11151/3105/3135/3635/1436/5777/3965/1725/3659/3718/9466/63925/2950/5880/7305/598/5585/51043/975/933/11006/1051/1265/64600/6352/23308/6777/80762/51293/177/27242/4067/6469/3087/29108/3485/3592/4615/199/1947/7128/923/8744/100/26279/640/3481/1026/7356/8660/959/7940/2048/7048/30835/1435/3620/3123/8764/652
BP	GO:0002764	immune response-regulating signaling pathway	347	0.304857	1.47923	0.000498061	0.0186494	0.0159508	2810	tags=29%, list=21%, signal=23%	10859/5970/7917/409/3661/8525/7409/5580/4814/81622/10288/3105/3135/3635/58509/5293/728/10062/9473/51296/5777/2874/11331/7867/3659/3654/7805/8517/5338/2268/25865/10616/11027/10318/10211/1445/3551/55666/7305/9261/79671/1512/3665/2219/5579/975/945/10917/2207/3055/22861/2033/933/11006/929/6714/3783/54923/23308/63906/5170/10392/27242/3937/4067/81570/7410/4795/29108/4615/25/10603/5063/9698/59338/973/71…
BP	GO:0034660	ncRNA metabolic process	433	-0.242129	-1.40955	0.000501327	0.0186805	0.0159774	2609	tags=29%, list=20%, signal=24%	55006/79753/7528/65080/3725/84549/51106/79664/55278/6217/55035/23404/60487/192670/55656/4602/54514/23211/339175/8850/2908/92342/55039/80324/27292/9330/64172/79693/29063/1655/8780/6201/2091/9326/25983/1653/10813/57117/9836/79828/23369/1787/79979/10978/10927/7257/1022/112479/29102/6125/54974/10556/5591/6223/55720/55636/10885/11102/23379/55596/3181/4087/6208/25940/51096/4691/7247/29081/6617/25896/53…
BP	GO:1903350	response to dopamine	66	0.453152	1.77619	0.000506469	0.0186907	0.0159861	4045	tags=52%, list=31%, signal=36%	2778/1785/409/2931/2769/2316/23385/3359/3350/9368/2775/25/3352/3360/50632/26538/5595/2782/10419/3066/7052/1132/112/1813/3357/1133/238/3362/55737/1816/2767/11255/468/5731
BP	GO:1903351	cellular response to dopamine	66	0.453152	1.77619	0.000506469	0.0186907	0.0159861	4045	tags=52%, list=31%, signal=36%	2778/1785/409/2931/2769/2316/23385/3359/3350/9368/2775/25/3352/3360/50632/26538/5595/2782/10419/3066/7052/1132/112/1813/3357/1133/238/3362/55737/1816/2767/11255/468/5731
BP	GO:0006814	sodium ion transport	189	0.347387	1.58761	0.000509778	0.0187228	0.0160135	3858	tags=38%, list=29%, signal=27%	1785/124565/53827/81/8884/6520/207/6539/7226/53373/55238/80024/10768/9058/64078/9368/7533/6640/57731/6536/79570/525/53826/6540/6336/6326/6535/3784/26249/6533/29099/4842/486/5311/40/476/6532/6548/482/6327/54795/1188/6528/11261/26504/288/60482/5318/5348/5349/496/23315/6324/150094/51297/1813/2259/1272/4734/483/6339/10021/5581/1760/4878/54946/54997/10991/6584/5652/478/6554
BP	GO:0050778	positive regulation of immune response	435	0.287321	1.42819	0.00051451	0.0188066	0.0160852	2728	tags=26%, list=21%, signal=22%	7040/6688/10859/5970/7917/920/3661/3133/7297/972/8525/7409/54440/6778/5580/5199/912/3106/3105/3135/3635/56848/5293/728/9473/5777/2874/64170/3965/5724/3689/7805/8517/3134/9466/5338/2268/25865/10616/11027/4841/10865/1445/10432/8741/3551/7305/9641/3566/5914/1675/3665/2219/5579/975/713/10917/2207/3055/5817/2033/933/6556/11006/3916/101/6714/6352/3783/30009/389856/54923/3263/23308/6777/27242/3937/4067/…
BP	GO:0098780	response to mitochondrial depolarisation	17	0.673876	1.93069	0.000527494	0.0190096	0.0162589	2069	tags=59%, list=16%, signal=50%	11140/2874/10013/9776/10075/65018/8878/27429/7416/9927
CC	GO:0042611	MHC protein complex	21	0.631211	1.91758	0.000526606	0.0190096	0.0162589	466	tags=33%, list=4%, signal=32%	3133/972/3106/3105/3135/3107/3134
MF	GO:0004713	protein tyrosine kinase activity	126	0.384601	1.66949	0.000525846	0.0190096	0.0162589	3938	tags=46%, list=30%, signal=33%	7297/5315/5580/2242/1436/1196/5605/3718/2268/1445/2185/25778/9031/1198/9149/613/3055/10188/6714/780/4067/2047/7016/5604/25/4058/2050/1956/8829/640/27/8828/1119/10461/2051/2048/3932/5607/2043/3482/5159/5609/6850/2041/10645/7301/8798/2322/7075/1969/8444/4914/238/4486/2044/4145/8711/5747
BP	GO:0032543	mitochondrial translation	84	-0.373963	-1.71425	0.000534689	0.0191788	0.0164036	3599	tags=57%, list=27%, signal=42%	4701/28973/283459/56945/63875/65005/57038/10128/54516/55699/60488/4528/63931/8846/65080/55278/28958/55037/23107/64976/51021/51318/79072/85476/79828/28957/51373/51023/9801/29093/10102/22868/55052/54148/28977/122704/7818/10884/28998/51650/55005/29074/78988/10240/51067/63899/11222/9553
BP	GO:0061615	glycolytic process through fructose-6-phosphate	18	0.667828	1.94321	0.000549623	0.0194511	0.0166365	2057	tags=56%, list=16%, signal=47%	5315/7167/2584/3098/3101/3607/5211/83440/2027/2645
MF	GO:0140297	DNA-binding transcription factor binding	405	0.296602	1.46371	0.000547583	0.0194511	0.0166365	2440	tags=28%, list=18%, signal=24%	6881/6688/5970/23558/60/3297/57326/10025/6907/4772/7994/81/8861/11331/7157/84148/81857/3727/118/10370/7376/64784/22933/1460/10865/6604/9968/8289/6256/10474/6867/3159/10014/2203/51564/10634/23028/6774/5585/9112/2316/8648/80279/26155/23373/2002/51341/7205/26287/3728/5579/25855/1108/7421/9150/602/2648/811/10524/6598/27163/2033/1050/10270/9817/9612/1051/24148/6597/5916/6878/6714/7533/7392/4088/6777/1…
BP	GO:0010942	positive regulation of cell death	491	0.284252	1.426	0.00054988	0.0194511	0.0166365	3215	tags=32%, list=24%, signal=25%	4296/8241/10859/1785/409/7132/7133/2309/5580/9040/3135/8742/3635/4055/27141/7351/56848/2896/5293/10300/706/113419/7157/3965/5371/3689/7805/10013/57787/5518/2931/10616/22933/4035/1981/7226/10921/6609/7305/51063/388/1512/8648/2002/5326/25999/5499/25855/4616/7421/1509/8878/8061/7704/11132/3064/9368/5916/101/6714/6352/51024/3663/389856/55294/1029/27120/10392/5883/3579/4067/578/2021/1075/3164/8795/164…
CC	GO:0030312	external encapsulating structure	446	0.2901	1.44781	0.000557036	0.0195242	0.016699	4171	tags=35%, list=32%, signal=25%	7077/7040/3383/5315/3700/5199/7045/3965/6277/4054/8985/7076/1508/3068/7059/7450/64386/8214/1512/5660/2219/22932/713/5269/811/1509/51162/5016/64499/23768/5265/4326/1294/9672/25992/4588/3263/10516/7177/2246/1075/60484/6469/5176/1298/30008/4256/5549/5340/4185/1302/4053/8455/3440/655/7146/9719/3483/3959/2147/63827/2734/43/176/871/7041/1296/3691/2688/78987/1476/345/10319/83716/1605/977/4059/3698/311/7…
CC	GO:0031012	extracellular matrix	446	0.2901	1.44781	0.000557036	0.0195242	0.016699	4171	tags=35%, list=32%, signal=25%	7077/7040/3383/5315/3700/5199/7045/3965/6277/4054/8985/7076/1508/3068/7059/7450/64386/8214/1512/5660/2219/22932/713/5269/811/1509/51162/5016/64499/23768/5265/4326/1294/9672/25992/4588/3263/10516/7177/2246/1075/60484/6469/5176/1298/30008/4256/5549/5340/4185/1302/4053/8455/3440/655/7146/9719/3483/3959/2147/63827/2734/43/176/871/7041/1296/3691/2688/78987/1476/345/10319/83716/1605/977/4059/3698/311/7…
BP	GO:2001251	negative regulation of chromosome organization	79	-0.386857	-1.75306	0.000573002	0.0199926	0.0170996	2394	tags=43%, list=18%, signal=35%	3192/9183/10111/57405/699/7517/6419/9587/54552/4171/9232/701/7272/55143/167227/7175/7153/3550/7756/55055/51143/891/4683/472/80351/3183/11130/26271/5885/25913/9184/8467/4085/324
BP	GO:0033500	carbohydrate homeostasis	196	0.340448	1.5628	0.000585477	0.0202438	0.0173145	2829	tags=33%, list=21%, signal=26%	4221/3383/2309/51094/7351/653361/9230/5127/1725/5106/79058/207/3098/9990/3101/6774/51763/80024/3607/2821/10723/9024/5566/5894/9854/10524/6598/1050/28999/55011/6597/5296/177/51548/2021/4041/5176/1408/240/3630/5164/2645/3170/5080/6794/51085/4884/2876/8398/1268/4544/8660/2844/55198/1535/2030/2621/5443/3123/54209/54795/846/572/8609
BP	GO:0042593	glucose homeostasis	196	0.340448	1.5628	0.000585477	0.0202438	0.0173145	2829	tags=33%, list=21%, signal=26%	4221/3383/2309/51094/7351/653361/9230/5127/1725/5106/79058/207/3098/9990/3101/6774/51763/80024/3607/2821/10723/9024/5566/5894/9854/10524/6598/1050/28999/55011/6597/5296/177/51548/2021/4041/5176/1408/240/3630/5164/2645/3170/5080/6794/51085/4884/2876/8398/1268/4544/8660/2844/55198/1535/2030/2621/5443/3123/54209/54795/846/572/8609
BP	GO:1903008	organelle disassembly	109	0.390652	1.65547	0.000599204	0.0206255	0.0176409	2119	tags=37%, list=16%, signal=31%	2011/11152/11140/8729/10226/23647/57104/706/11331/7157/8408/10013/25793/2931/51368/11337/23400/7249/9776/23192/10075/2801/65018/8878/10524/6720/3064/6811/84164/6721/51024/55294/23130/79065/27429/1459/7416/26100/9927/1939
BP	GO:0016575	histone deacetylation	74	0.442947	1.76662	0.000604494	0.0207147	0.0177172	1611	tags=35%, list=12%, signal=31%	1107/6907/56848/23309/7157/10013/25865/22933/53615/10432/10474/10014/51564/9112/25855/51043/1108/65018/2648/6720/10270/26993/51547/51548/54531/1487
BP	GO:0010563	negative regulation of phosphorus metabolic process	334	0.308508	1.49773	0.000607195	0.0207148	0.0177173	2866	tags=31%, list=22%, signal=25%	7040/2771/4221/9647/23636/409/2280/23770/7531/7529/5580/58509/84619/978/706/5777/7157/140885/6992/25793/5518/10019/2931/22933/2950/207/64780/4035/1445/5987/3551/1981/6609/79888/2203/7249/10636/6774/5585/51763/80279/2022/9961/5339/4616/5525/79643/10507/1050/11006/8396/1028/10217/7498/51024/55861/5170/1029/26051/3623/4067/51548/23645/578/4041/55755/7016/23175/1408/3087/29108/4298/25/1032/2776/51422…
CC	GO:0005844	polysome	57	-0.41968	-1.80449	0.000619919	0.020844	0.0178278	1317	tags=32%, list=10%, signal=29%	6142/6128/6191/2332/1965/8939/1660/6170/6228/6169/6188/6130/6160/6235/7411/8087/6227/6152
BP	GO:0002275	myeloid cell activation involved in immune response	83	0.421875	1.71775	0.000616502	0.020844	0.0178278	2573	tags=36%, list=19%, signal=29%	6688/2242/6813/56848/2896/5293/5777/6844/3965/5724/3689/2268/11027/5880/7305/3566/5730/22904/613/2207/5170/4067/29108/4615/27040/640/3162/8291/7462/10814
CC	GO:0098978	glutamatergic synapse	265	0.32516	1.55751	0.000621845	0.020844	0.0178278	3414	tags=36%, list=26%, signal=27%	5879/5970/1785/81926/9921/5216/60/11151/4900/11331/5518/2319/8536/10211/8775/2185/1173/8943/5023/10636/23373/5499/22839/2550/9454/6455/613/27092/6780/1500/6714/80852/22883/4067/2047/5520/491/1487/70/79414/2903/26280/53826/9228/9127/5063/29/58504/5340/5575/5300/6336/1821/2895/6326/8829/8326/64840/8828/9455/63827/57406/4884/50632/1268/1994/107/4218/6511/5327/87/2048/1605/814/23237/54413/274/7143/57…
CC	GO:0098797	plasma membrane protein complex	482	0.282272	1.41471	0.000620434	0.020844	0.0178278	4765	tags=41%, list=36%, signal=28%	2771/5879/2778/920/2280/3133/7297/972/54518/2783/3687/8514/10077/3678/3106/161/3105/3135/1212/3107/653361/5777/3689/3134/9466/2319/6520/10211/3779/4035/2769/2185/3551/1173/5880/1175/3570/2316/2815/23385/9114/3728/6464/2550/3756/2207/27092/4689/3359/9618/9368/1500/2775/3753/101/10188/3783/54923/6640/3623/1211/4067/3746/4041/2903/3683/27429/2812/843/3785/2776/11194/6336/973/2895/6326/3784/1956/2902…
BP	GO:0000729	DNA double-strand break processing	14	-0.692245	-2.04933	0.000628199	0.0209655	0.0179317	3171	tags=79%, list=24%, signal=60%	10111/641/1763/6419/55218/5932/4683/7334/83990/51444/7336
BP	GO:0031346	positive regulation of cell projection organization	292	0.312406	1.50349	0.000632851	0.0210293	0.0179863	3009	tags=30%, list=23%, signal=24%	2011/5879/1785/23654/8175/116985/5216/10163/2242/2896/10300/5605/57787/57175/23129/5526/8536/23316/10494/8428/816/2185/29882/5880/23028/2316/2664/23373/54869/10938/7471/2648/1523/9139/10507/2033/9037/3064/9820/57154/6714/8321/6624/9638/51393/4067/11344/5176/5604/3630/1382/1826/25/51364/23580/5063/1857/4058/54606/8976/8829/1002/9696/2889/54849/6794/5365/10435/55835/27/655/1856/3984/2909/1268/482/9…
BP	GO:0051298	centrosome duplication	54	-0.430001	-1.81784	0.000635891	0.0210392	0.0179948	2113	tags=41%, list=16%, signal=34%	8850/1069/51652/4591/7514/54820/55125/4682/10733/675/7840/25978/27243/6491/9738/23411/23032/26973/4869/80254/51510/9525
BP	GO:0006949	syncytium formation	50	0.48053	1.78232	0.000641563	0.0211358	0.0180774	1047	tags=26%, list=8%, signal=24%	4627/2067/8536/10211/51177/7305/3566/10938/9149/975/22904/7471/3756
BP	GO:0008608	attachment of spindle microtubules to kinetochore	34	-0.516975	-1.95873	0.000650761	0.0213472	0.0182582	2315	tags=53%, list=17%, signal=44%	3192/57405/998/27436/11004/8850/55143/22919/79003/7756/891/81929/1894/9184/29127/51115/324/5925
CC	GO:0005938	cell cortex	238	0.329769	1.55718	0.000663778	0.0216815	0.0185442	3938	tags=41%, list=30%, signal=29%	4650/5879/752/5829/391/23406/7127/23265/29959/6709/5216/60/23647/11151/4627/1212/832/81/10487/2319/1455/64236/10211/2185/5880/1639/388/2316/389/7171/5579/10121/2035/10398/4926/9854/29984/9948/9743/1500/22906/11005/6624/80762/1211/57731/2246/1487/3996/22844/6786/54509/8976/6261/9478/5311/11336/3059/1778/2010/87/4354/8874/23332/2868/23237/8312/89/4647/2026/2039/631/22836/22999/1000/999/26064/1488/2…
BP	GO:0022618	ribonucleoprotein complex assembly	167	-0.310791	-1.60497	0.000666678	0.021684	0.0185462	2099	tags=34%, list=16%, signal=29%	6633/10728/58155/6636/3646/91746/27336/9326/1653/83443/6634/11168/11052/79833/9733/8161/6629/7520/10978/6193/6430/6125/51340/11051/5591/6223/6606/6128/22868/10772/55052/23451/6208/472/8487/55015/11171/1660/8669/96764/9879/6169/54505/6732/10659/6632/28985/23405/51065/8562/6635/6426/8559/10480/79577/6637/6152
BP	GO:1901653	cellular response to peptide	320	0.308049	1.49254	0.000673639	0.021818	0.0186608	2948	tags=32%, list=22%, signal=25%	4790/2771/4221/5970/5829/3383/7297/5315/6778/2309/5580/51094/55625/9181/3297/7351/7431/6844/353/7157/896/5106/3718/599/79746/2931/51274/5447/207/4035/1445/10014/2203/7249/2101/6774/8471/1398/51763/8648/23038/5579/6464/51043/7471/4363/6720/10768/28999/11132/8396/2805/9640/6714/5296/2865/6777/5170/177/10392/4067/3164/9361/10365/23175/3630/5164/10603/5905/1663/2529/55512/2645/5786/3625/3481/4303/543…
CC	GO:0070820	tertiary granule	139	0.369121	1.62246	0.000686999	0.0221571	0.0189509	1374	tags=27%, list=10%, signal=24%	7077/527/10312/5879/1471/79930/3687/8514/6709/5199/10288/161/6813/978/226/5777/140885/5724/3689/79792/81619/7226/11322/1512/1729/2548/945/124583/5269/1509/23218/2207/4069/6556/3916/1265/101
BP	GO:0062197	cellular response to chemical stress	278	0.312636	1.49625	0.000692871	0.022253	0.019033	2442	tags=29%, list=18%, signal=24%	5970/5829/1201/6778/2309/5580/5598/9181/3297/653361/5971/706/215/7157/5371/140885/10013/25793/8877/22933/4841/10494/207/8428/5034/51157/7226/9990/23400/2203/2936/388/2539/4358/51389/26287/5339/65018/7471/5269/23135/4363/9973/64223/9817/6780/10367/6714/8321/55294/10131/10516/2021/9361/10365/1649/488/2176/240/3630/29108/27429/25/5164/231/55512/59338/199/6326/1612/1956/7128/10105/221/655/5311/2876/3…
CC	GO:0030139	endocytic vesicle	292	0.311079	1.4971	0.000698886	0.0223527	0.0191182	1551	tags=20%, list=12%, signal=18%	527/10312/6892/7791/1785/10618/409/920/752/3133/972/7454/79890/818/1441/81622/3106/161/23166/11151/3105/3135/1212/2535/3107/9170/653361/9230/5878/7431/6844/9146/57192/3134/2319/8877/816/4035/1173/5880/1175/9114/9610/10938/26119/7471/811/27092/4689/10525/6556/3916/551/101/3263/10392/8029/1211/4067
BP	GO:1901652	response to peptide	438	0.290628	1.44644	0.00070326	0.0223993	0.019158	2948	tags=29%, list=22%, signal=23%	4790/2771/4221/5970/5829/3383/7297/5315/6778/2309/5580/51094/55625/9181/3297/7351/7431/6844/64170/353/7157/896/5106/3727/3718/22937/7076/599/1537/79746/2931/51274/5447/207/4035/1445/10014/2203/7249/6773/6429/2101/6774/8471/1398/51763/8648/23038/5579/6464/51043/7471/9810/3636/22861/4363/6720/10768/28999/11132/8396/2805/9640/6714/5296/682/3663/2865/6716/6777/5170/177/10392/4067/3164/9361/10365/5176…
BP	GO:0050806	positive regulation of synaptic transmission	132	0.374169	1.63363	0.000713349	0.0226267	0.0193526	4132	tags=46%, list=31%, signal=32%	409/10288/253980/4900/6844/10211/2185/7305/10636/23385/23373/65018/27092/8878/6780/177/22883/2903/4204/3630/51304/25/5575/2902/5020/766/1268/107/2048/23237/9495/54413/7143/2043/10858/1395/148/9001/794/3814/22999/2852/5582/6804/1813/54915/6809/9378/22871/9746/5581/4914/7124/6869/5764/114/5641/1742/10769/1020/4311
BP	GO:1902893	regulation of miRNA transcription	56	0.472732	1.79094	0.000720255	0.0227517	0.0194595	1470	tags=27%, list=11%, signal=24%	7040/6688/5970/2309/7157/7376/6774/5914/8061/6720/11006/6597/6721/4775/4088
BP	GO:0046339	diacylglycerol metabolic process	20	0.637042	1.91544	0.000728821	0.0228641	0.0195556	2770	tags=45%, list=21%, signal=36%	8694/8525/57104/8527/1606/3991/23659/9489/747
BP	GO:0016570	histone modification	365	0.29774	1.45303	0.000729768	0.0228641	0.0195556	2615	tags=30%, list=20%, signal=25%	23476/6881/4221/6688/23558/60/27005/6830/10498/1107/57326/6907/56848/23309/7994/8861/79903/7157/84148/10013/339287/4297/25865/63925/22933/10865/10919/30827/53615/10432/10474/10014/10445/8314/51564/23028/9682/4802/9112/84759/10075/9031/8648/26155/9757/84656/8242/25855/51043/1108/65018/1025/2648/9810/23135/10524/6598/6720/79831/2033/5252/55011/10270/8888/1642/26993/51547/6878/2145/57332/9869/51548/…
BP	GO:0007264	small GTPase mediated signal transduction	399	0.292837	1.44272	0.000739528	0.0230757	0.0197366	3144	tags=32%, list=24%, signal=25%	4650/5879/23636/1785/79930/9922/51291/9909/7454/391/7409/116985/8729/1072/23647/10163/5863/9046/9181/23616/253980/4924/6494/9138/393/396/11188/7157/28511/11186/9826/5338/10211/23092/392/10235/6478/11337/23550/5880/2203/7249/65979/388/1398/2664/389/54869/10155/5900/10287/613/5894/27128/8878/50619/55200/9815/55114/9844/29984/27352/89941/23268/9743/9771/10188/6714/1029/9869/8567/64411/64423/7410/720…
BP	GO:0061614	miRNA transcription	57	0.460944	1.75231	0.000750485	0.0233228	0.0199479	1470	tags=26%, list=11%, signal=23%	7040/6688/5970/2309/7157/7376/6774/5914/8061/6720/11006/6597/6721/4775/4088
BP	GO:0045936	negative regulation of phosphate metabolic process	333	0.305494	1.48358	0.000769461	0.0236787	0.0202524	2866	tags=31%, list=22%, signal=25%	7040/2771/4221/9647/23636/409/2280/23770/7531/7529/5580/58509/84619/978/706/5777/7157/140885/6992/25793/5518/10019/22933/2950/207/64780/4035/1445/5987/3551/1981/6609/79888/2203/7249/10636/6774/5585/51763/80279/2022/9961/5339/4616/5525/79643/10507/1050/11006/8396/1028/10217/7498/51024/55861/5170/1029/26051/3623/4067/51548/23645/578/4041/55755/7016/23175/1408/3087/29108/4298/25/1032/2776/51422/5575…
BP	GO:0030098	lymphocyte differentiation	354	0.29856	1.4527	0.000771194	0.0236787	0.0202524	3701	tags=37%, list=28%, signal=27%	10312/6688/920/678/972/7409/54440/6778/2309/4066/60/912/10288/10945/3135/3635/5293/5971/5777/2874/7157/3965/64218/3659/25793/3718/3561/1209/23598/6604/8289/4242/864/2185/10014/8943/3566/6774/3570/5914/51341/51043/7471/602/6601/2648/2207/10524/6598/2033/7704/8456/11006/6097/6597/3394/101/5296/57178/9092/11005/30009/6777/80762/10538/3623/6602/6603/4063/578/6469/6482/3087/3955/3601/25/2529/973/2736/…
BP	GO:0044057	regulation of system process	473	0.285323	1.42905	0.000769952	0.0236787	0.0202524	4093	tags=36%, list=31%, signal=26%	2771/1890/9921/3687/7531/7132/7133/2309/818/10062/706/5724/8877/7376/2931/23316/816/489/2185/5023/7137/7136/2539/2316/51763/3728/22839/2548/1025/9454/9150/2035/10398/5566/2166/27092/6720/3350/551/9368/3753/2946/6714/4088/6640/153/177/3623/27242/57731/491/146/1075/3164/5090/4987/488/23175/1408/2903/4204/25/9228/1908/6663/5575/6336/199/3784/2902/100/3625/6508/27302/5020/4881/4842/1889/4884/4000/921…
BP	GO:0019885	antigen processing and presentation of endogenous peptide antigen via MHC class I	16	0.679932	1.92974	0.000779138	0.0237373	0.0203025	466	tags=44%, list=4%, signal=42%	6892/3133/3106/3105/3135/3107/3134
MF	GO:0043130	ubiquitin binding	75	0.424652	1.69669	0.000779286	0.0237373	0.0203025	2124	tags=39%, list=16%, signal=33%	23636/5886/11047/23163/127544/79004/9146/10013/25793/57787/8517/404093/10616/22933/55666/550/51160/54472/8878/84164/81858/10043/23062/4088/55294/55968/51035/7128/9683
BP	GO:0045841	negative regulation of mitotic metaphase/anaphase transition	42	-0.475025	-1.91361	0.000790749	0.023803	0.0203587	3192	tags=57%, list=24%, signal=44%	9735/1063/55795/9183/57405/699/7517/9587/701/7272/55143/7175/3550/7756/55055/51143/891/472/11130/26271/5885/9184/4085/324
BP	GO:0050777	negative regulation of immune response	159	0.356937	1.60518	0.000793848	0.023803	0.0203587	3328	tags=40%, list=25%, signal=30%	6688/10859/409/3133/6778/3106/3105/3135/3635/58509/60343/2896/10062/5777/3965/3134/3718/9466/7376/2268/23170/5987/3566/6773/8815/79671/1398/79651/51043/5045/613/84243/3055/11006/6714/11005/30009/80762/4067/3630/4852/7128/3440/79132/2876/3162/3805/3123/8764/64127/54209/103/6737/25939/56833/100507436/6850/7301/710/1813/23609/2671/8995
MF	GO:0061629	RNA polymerase II-specific DNA-binding transcription factor binding	307	0.307963	1.48899	0.000785048	0.023803	0.0203587	2440	tags=30%, list=18%, signal=25%	6881/6688/5970/23558/60/3297/10025/4772/7994/81/8861/11331/7157/84148/81857/3727/118/10370/7376/1460/10865/6604/9968/8289/6256/10474/6867/3159/10014/2203/10634/23028/6774/5585/9112/8648/80279/2002/51341/7205/26287/5579/25855/1108/7421/9150/811/6598/2033/1050/10270/9817/9612/1051/24148/6597/5916/6878/6714/7533/4088/6777/1029/23019/1487/3164/171023/1649/79447/1408/23522/4209/9049/9314/8022/3275/892…
BP	GO:0006511	ubiquitin-dependent protein catabolic process	470	-0.238106	-1.37961	0.000792717	0.023803	0.0203587	2407	tags=30%, list=18%, signal=26%	8287/6400/8667/5682/9709/54778/5717/23358/10600/10475/8027/11342/9690/5700/6502/84669/25897/8945/857/6790/8450/7326/55872/79718/9529/5516/5691/51652/1540/81847/79139/6201/23429/9960/56893/5713/7514/4534/54431/9100/7184/54941/29082/9349/1499/79031/6125/9354/10952/7874/27246/7337/27252/25978/56929/6451/8453/26235/51439/4189/80196/55236/4121/26043/27243/64750/7321/9861/996/4780/23304/9320/3093/5686/…
MF	GO:0017171	serine hydrolase activity	148	0.360657	1.59253	0.000798547	0.0238508	0.0203995	5013	tags=49%, list=38%, signal=31%	9159/1200/327/5476/1506/1675/1512/5045/3004/64499/339105/101/5550/649/64063/7177/1075/9361/10747/27429/3816/5340/715/23436/26085/25818/717/2147/6768/23430/43/54878/440387/8398/5327/11012/49/5653/8192/29122/25807/5125/13/5046/2159/1504/56649/8720/1636/11330/4323/5652/3083/11202/5645/3002/7093/43849/1513/5646/43847/5644/4322/629/64699/5624/8858/7174/8909/2160/5328/922/4327
BP	GO:0032944	regulation of mononuclear cell proliferation	206	0.336713	1.55674	0.000844578	0.0251278	0.0214918	2717	tags=31%, list=21%, signal=25%	10859/3133/7297/972/7133/54440/10077/912/10288/11151/3105/3135/3635/5777/3965/1725/3659/3718/9466/63925/5880/7305/598/5585/51043/975/933/11006/1051/64600/6352/23308/6777/80762/51293/177/27242/4067/6469/29108/3485/3592/4615/199/1947/923/8744/100/26279/640/3481/1026/7356/8660/959/7940/2048/7048/30835/1435/3620/3123/8764/652
MF	GO:0001216	DNA-binding transcription activator activity	380	0.299642	1.46747	0.00086218	0.0255525	0.021855	3700	tags=34%, list=28%, signal=25%	4790/6688/22877/5970/27287/3661/51621/6778/2309/3297/7030/4772/10062/4782/1874/3660/6689/7157/1961/3659/1052/3727/7376/2000/51157/2355/4802/6774/100271849/2002/5326/6257/3607/51043/7629/8061/1628/6720/1050/7704/28999/8456/4791/64763/9189/171017/1051/3221/7008/4775/30009/3663/4088/6777/10538/2120/7709/2116/3164/5090/4097/1649/3211/3087/4209/63974/9314/8022/30062/4901/6663/4520/8928/1877/5309/7757/…
BP	GO:0001909	leukocyte mediated cytotoxicity	115	0.39129	1.67598	0.000868092	0.0256287	0.0219202	1799	tags=26%, list=14%, signal=23%	6688/10859/409/3133/3383/7409/127544/912/3106/11151/3105/3135/6813/23207/5777/3965/3134/7305/1398/1512/3004/5817/3916/10383/6777/177/1075/203068/3592/4615
CC	GO:0030666	endocytic vesicle membrane	167	0.357068	1.60901	0.000872287	0.0256539	0.0219417	1324	tags=21%, list=10%, signal=19%	527/10312/6892/1785/10618/920/3133/972/818/1441/3106/161/23166/11151/3105/3135/2535/3107/9230/6844/57192/3134/816/4035/1173/5880/1175/9114/26119/7471/811/27092/6556/3916/551
BP	GO:0002831	regulation of response to biotic stimulus	281	0.313687	1.50134	0.000883464	0.0258835	0.0221381	3291	tags=36%, list=25%, signal=27%	6688/10859/409/3661/3133/54476/59307/11140/7409/10077/912/3106/3105/3135/58509/60343/2896/653361/10062/5777/64170/3965/3659/3134/7376/2268/22933/11027/4841/23170/10432/3551/55666/7305/9641/6773/8815/79671/1398/3665/2219/5094/84243/3055/5817/2033/3916/929/101/80212/6714/6352/11005/389856/3263/63906/6777/10392/4067/55223/4795/3630/29108/3592/5063/9698/54765/23005/1612/7128/9683/25818/79132/57663/55…
CC	GO:0034719	SMN-Sm protein complex	14	-0.681258	-2.0168	0.000899847	0.0262536	0.0224546	2099	tags=71%, list=16%, signal=60%	6633/6636/6634/79833/6606/8487/11171/6632/6635/6637
BP	GO:0051438	regulation of ubiquitin-protein transferase activity	45	-0.463638	-1.89365	0.000902936	0.0262536	0.0224546	2204	tags=44%, list=17%, signal=37%	10059/55208/8945/701/9529/6201/9349/6125/6187/7334/26271/9184/23142/6167/4085/10116/11315/6500/648/54165
CC	GO:0000502	proteasome complex	51	-0.435597	-1.82373	0.000913695	0.0264661	0.0226364	2758	tags=49%, list=21%, signal=39%	9352/5702/23198/5682/5717/9690/5700/5691/5713/7337/9861/5686/10213/5685/5689/51377/5718/5716/5695/5684/5887/5701/5710/5683/5706
BP	GO:0000725	recombinational repair	120	-0.327975	-1.59438	0.000917449	0.026475	0.022644	3003	tags=41%, list=23%, signal=32%	6117/51659/23126/5892/7517/641/29072/7528/5889/64859/23503/4175/55218/4171/8089/7516/1111/5932/2073/7486/6119/55010/8317/56893/7520/10635/5980/675/79728/64769/3364/4683/472/10213/9643/86/7334/25836/11144/5885/23347/80010/51444/54556/23137/5965/64710/10933/10097
BP	GO:0006476	protein deacetylation	92	0.408463	1.67937	0.000932234	0.026653	0.0227962	1611	tags=30%, list=12%, signal=27%	1107/6907/56848/23309/7157/10013/25865/22933/53615/10432/10474/10014/51564/9112/2316/25855/51043/1108/65018/2648/6720/2033/10270/26993/51547/51548/54531/1487
BP	GO:0050870	positive regulation of T cell activation	220	0.332928	1.55416	0.000937508	0.026653	0.0227962	2817	tags=33%, list=21%, signal=27%	10859/920/3133/7297/972/7409/54440/2309/60/912/10288/11151/3105/3135/5777/3965/1725/140885/3718/3561/9466/2319/207/6604/8289/1445/864/8943/3566/5914/51043/975/6601/10524/6598/7704/11006/6597/101/6714/57178/6352/9092/23308/6777/177/4067/6602/6603/6469/29108/3485/3592/25/199/1947/2736/923/8744/100/3481/27/23149/959/7048/30835/3932/3123/8764/64127/6599/7070/572
BP	GO:0002699	positive regulation of immune effector process	218	0.330673	1.53766	0.00093421	0.026653	0.0227962	1551	tags=21%, list=12%, signal=19%	7040/6688/10859/3133/972/7409/54440/6778/5199/912/3106/2242/3105/3135/6813/56848/5777/11331/64170/3965/5724/3689/7805/3134/399687/2268/10865/3098/8741/5880/7305/3566/9261/5914/2219/2821/975/5817/3916/30009/2865/3263/6777/5170/10392/4067
BP	GO:0002009	morphogenesis of an epithelium	414	0.286915	1.42187	0.000935406	0.026653	0.0227962	3885	tags=35%, list=29%, signal=25%	7040/5879/6046/23654/3687/3611/5216/60/7408/3678/55625/23616/2535/1436/5293/11331/5371/10370/8985/23129/25865/1460/10522/9968/6692/7249/65979/7798/388/5914/2316/1512/56998/389/2022/10155/5499/7471/7421/2648/9024/5566/8456/9948/960/9368/6928/5916/57154/6714/8321/780/4088/80004/54101/3579/51548/54910/2246/10660/4041/6469/25/9314/1857/6663/3237/8928/10468/1956/2736/4855/8829/2295/25789/7414/26249/80…
MF	GO:0042288	MHC class I protein binding	17	0.660742	1.89306	0.000968672	0.0274374	0.0234671	1650	tags=41%, list=12%, signal=36%	6892/10859/3133/10288/29992/10383/203068
BP	GO:0050670	regulation of lymphocyte proliferation	202	0.33361	1.5408	0.00098063	0.027674	0.0236695	2717	tags=31%, list=21%, signal=25%	10859/3133/7297/972/7133/54440/10077/912/10288/11151/3105/3135/3635/5777/3965/1725/3659/3718/9466/63925/5880/7305/5585/51043/975/933/11006/1051/64600/6352/23308/6777/80762/51293/177/27242/4067/6469/29108/3485/3592/4615/199/1947/923/8744/100/26279/640/3481/1026/7356/8660/959/7940/2048/7048/30835/3620/3123/8764/652
BP	GO:0000280	nuclear division	350	-0.239807	-1.35651	0.0010079	0.0283394	0.0242386	2857	tags=35%, list=22%, signal=28%	3192/5977/9183/10111/5902/49856/23310/23236/57405/3834/998/11200/23126/8556/81565/8243/699/5892/7517/54892/64151/51203/8881/56603/55274/9055/5889/5139/259266/79703/9928/4288/192670/79866/54514/27436/10600/9587/28984/11004/55193/146909/22887/8850/9232/7314/6790/24137/701/7272/1111/55143/51652/22919/79003/6683/54820/55125/10635/29082/7175/4292/7153/675/3550/25978/7756/9787/27243/9134/9133/55055/231…
BP	GO:0045655	regulation of monocyte differentiation	16	0.674821	1.91524	0.00102119	0.0286083	0.0244686	2748	tags=62%, list=21%, signal=50%	920/972/2242/3635/56998/3665/22985/1435/3123/4609
BP	GO:0051225	spindle assembly	100	-0.342278	-1.62683	0.00103177	0.0287995	0.0246321	2579	tags=37%, list=19%, signal=30%	29899/9055/259266/55142/26054/54801/6790/24137/55143/51652/22919/55125/79441/29082/7175/4292/25978/7756/27243/9133/23122/9126/8766/140609/79598/10426/26271/6491/10274/56647/29127/10735/6188/10464/80254/51510/9525
BP	GO:0010586	miRNA metabolic process	72	0.439893	1.74194	0.00105023	0.0289984	0.0248022	1470	tags=25%, list=11%, signal=22%	4790/7040/23053/6688/5970/2309/7157/7376/8570/6774/5914/8061/6720/11006/6597/6721/4775/4088
MF	GO:0019783	ubiquitin-like protein peptidase activity	68	-0.390403	-1.72889	0.00104628	0.0289984	0.0248022	2407	tags=43%, list=18%, signal=35%	8287/8667/51029/23358/10600/26054/80124/84669/79184/1540/9960/9100/7874/55325/57337/10213/9736/7398/51138/115201/51377/7347/9101/10987/23032/4287/219333/10617/10010
BP	GO:0030522	intracellular receptor signaling pathway	223	0.321503	1.50374	0.00104728	0.0289984	0.0248022	2064	tags=26%, list=16%, signal=23%	5970/3661/23558/10498/57658/10062/51296/81/2874/11331/5371/10013/10370/7376/9667/8289/6256/10474/55666/112398/23028/2101/6774/5585/79671/5914/8648/3665/51341/6257/51389/7421/811/6720/2033/9612/6097/6597/247/5916/6714/57178/7533/63906/2063/23019/131566/81570/3164/171023/10365/79447/1408/9249/9698/3275/8928/11240/7128
BP	GO:0035825	homologous recombination	41	-0.469308	-1.87461	0.00106127	0.0291259	0.0249113	2542	tags=46%, list=19%, signal=38%	5892/5889/79703/11073/5932/10635/4292/7153/23304/4683/472/11144/580/5885/7155/7320/83990/80010/64710
BP	GO:0033047	regulation of mitotic sister chromatid segregation	50	-0.434252	-1.80582	0.00106623	0.0291259	0.0249113	3205	tags=48%, list=24%, signal=37%	3192/9183/57405/699/7517/9587/8850/9232/701/7272/55143/7175/3550/7756/55055/51143/891/472/11130/26271/5885/9184/4085/324
BP	GO:0002449	lymphocyte mediated immunity	254	0.322964	1.53953	0.00106255	0.0291259	0.0249113	1870	tags=22%, list=14%, signal=19%	7040/10312/10859/409/3133/3383/972/7454/7133/7409/54440/6778/127544/5580/6830/912/3106/11151/3105/3135/3635/23207/5777/64170/3965/2067/3134/9466/10865/8741/3566/1398/1512/3665/975/602/713/2207/3004/5817/11006/3916/10383/30009/3263/6777/80762/177/10538/1075/203068/10747/3592/4615/2529
BP	GO:0043471	regulation of cellular carbohydrate catabolic process	10	0.772703	1.89672	0.00108465	0.029495	0.025227	1723	tags=60%, list=13%, signal=52%	5261/7157/2931/5499/64223/3630
BP	GO:0006006	glucose metabolic process	154	0.359323	1.6034	0.00108742	0.029495	0.025227	2216	tags=30%, list=17%, signal=25%	5261/5315/51094/1196/60343/10295/7157/7167/5106/92579/5091/2931/207/3098/6576/3101/2203/2539/23038/3607/2821/2548/2648/27232/3636/2033/5211/1642/6097/51547/6714/83440/2027/51548/4041/3630/9563/5164/51181/3784/3486/2645/5207/3170/3481/6794
BP	GO:0050770	regulation of axonogenesis	136	0.354993	1.56182	0.00110627	0.0298753	0.0255523	4700	tags=45%, list=36%, signal=29%	2011/23654/393/5605/64218/8408/23129/10494/29882/2664/9024/3792/10507/9037/57154/51393/54910/11344/57556/5604/1382/1826/5063/8829/1002/6794/5365/23105/3984/2909/10371/1630/2048/7143/7070/2335/2043/9423/1600/1000/999/4133/80128/1954/7869/57715/1627/4803/1020/9723/6585/7074/659/9706/5361/27185/5362/9353/5663/10500/5454
BP	GO:0046631	alpha-beta T cell activation	142	0.352541	1.55002	0.00110923	0.0298753	0.0255523	1870	tags=25%, list=14%, signal=22%	10312/10859/3133/7297/54440/6778/3105/5971/3965/64218/3659/3718/3561/2000/864/8943/3566/6774/3570/5914/51043/975/602/7704/11006/6097/30009/80762/177/10538/4063/6469/3630/3592/25/2529
BP	GO:0006007	glucose catabolic process	22	0.606837	1.86951	0.00111681	0.0299741	0.0256368	2943	tags=59%, list=22%, signal=46%	5315/7157/7167/3098/3101/3607/5211/2027/4041/2645/572/89/2026
CC	GO:0062023	collagen-containing extracellular matrix	352	0.298118	1.44937	0.00112305	0.0300367	0.0256903	4128	tags=34%, list=31%, signal=24%	7077/7040/3383/5315/3700/5199/7045/3965/6277/4054/8985/7076/1508/3068/7059/7450/1512/5660/2219/713/5269/811/1509/51162/64499/5265/1294/9672/3263/10516/7177/1075/6469/5176/1298/30008/4256/5549/5340/4185/1302/4053/8455/3440/655/7146/3959/2147/63827/43/176/871/7041/1296/3691/2688/78987/1476/345/10319/1605/977/4059/3698/311/7143/11117/3913/2335/5118/8406/64129/1955/3273/1289/2220/2662/9423/8722/6649/…
BP	GO:1903037	regulation of leukocyte cell-cell adhesion	315	0.304213	1.47165	0.0011406	0.0304001	0.0260012	2817	tags=30%, list=21%, signal=24%	10859/5970/920/3133/7297/972/7409/54440/2309/60/10077/912/10288/11151/3105/3135/5777/3965/1725/3659/140885/5724/3654/3689/7805/3718/3561/9466/2319/207/6604/8289/1445/864/8943/3566/5914/51043/975/6601/10524/6598/7704/11006/960/1051/6597/64600/101/6714/57178/6352/9092/30009/23308/6777/80762/177/27242/4067/6602/6603/6469/240/29108/3485/3592/25/9314/2529/199/1947/2736/3440/923/8744/100/26279/3481/27/…
BP	GO:0007064	mitotic sister chromatid cohesion	15	-0.652627	-1.95009	0.00116622	0.0308687	0.0264019	1153	tags=47%, list=9%, signal=43%	9126/23244/25836/23137/5925/80218/23047
MF	GO:0003729	mRNA binding	249	-0.268527	-1.44787	0.0011656	0.0308687	0.0264019	1905	tags=27%, list=14%, signal=23%	1655/8672/91746/7072/6201/7298/11052/23369/50804/10146/90806/6193/6430/7175/6125/2107/11051/5511/79048/3181/10949/3658/23451/9908/6208/1429/4691/6187/27067/3184/7247/6189/11224/51441/11066/3183/26354/28998/6129/2332/11171/8939/1660/51362/1479/23283/10659/6434/113251/9728/11340/22849/6741/6188/26135/11315/3190/54542/8562/220988/10492/6426/8087/6152/64783/253943/373863
BP	GO:0002832	negative regulation of response to biotic stimulus	95	0.398691	1.65316	0.001195	0.0315218	0.0269605	3291	tags=44%, list=25%, signal=33%	10859/409/3133/59307/3106/3105/3135/58509/60343/2896/10062/3965/3134/7376/22933/11027/23170/55666/6773/8815/79671/1398/5094/84243/11005/63906/4795/3630/23005/7128/79132/3805/6895/103/6737/25939/56833/100507436/7301/710/1813/2671
BP	GO:0046031	ADP metabolic process	81	0.424472	1.71918	0.00124367	0.0326932	0.0279624	2061	tags=32%, list=16%, signal=27%	5315/55526/226/7167/2584/4967/3098/3101/2203/6774/11182/402/51341/3607/2821/2033/5211/64223/83440/2027/51548/3630/51422/54541/2645/5207
BP	GO:0048010	vascular endothelial growth factor receptor signaling pathway	46	0.479014	1.74068	0.00126762	0.0332092	0.0284037	2348	tags=33%, list=18%, signal=27%	7409/3678/7867/9146/25865/2185/7423/9261/5579/6714/7410/8817/3087/8829/2303
BP	GO:0051985	negative regulation of chromosome segregation	47	-0.439332	-1.79916	0.00127638	0.0332118	0.028406	2265	tags=47%, list=17%, signal=39%	9183/57405/699/7517/9587/9232/701/7272/55143/7175/3550/7756/55055/51143/891/472/11130/26271/5885/9184/4085/324
BP	GO:1905819	negative regulation of chromosome separation	47	-0.439332	-1.79916	0.00127638	0.0332118	0.028406	2265	tags=47%, list=17%, signal=39%	9183/57405/699/7517/9587/9232/701/7272/55143/7175/3550/7756/55055/51143/891/472/11130/26271/5885/9184/4085/324
BP	GO:0032720	negative regulation of tumor necrosis factor production	51	0.4696	1.74247	0.00128352	0.0332848	0.0284684	2728	tags=41%, list=21%, signal=33%	10859/409/58509/706/5777/3965/140885/9466/2950/5987/5914/602/945/11006/10270/4795/7128/2621/5443/64127/54209
BP	GO:0043300	regulation of leukocyte degranulation	44	0.49245	1.77855	0.00130077	0.0336186	0.0287539	1551	tags=34%, list=12%, signal=30%	6688/2242/6813/56848/3965/5724/3689/3134/2268/5880/3566/613/3916/5170/4067
MF	GO:0042605	peptide antigen binding	23	0.600783	1.86825	0.00131699	0.0339236	0.0290148	466	tags=30%, list=4%, signal=29%	6892/3133/3106/3105/3135/3107/3134
BP	GO:1905820	positive regulation of chromosome separation	22	-0.573701	-1.92451	0.00133599	0.0342979	0.0293349	2785	tags=55%, list=21%, signal=43%	54892/64151/8881/9587/55143/5359/9787/996/8697/10592/10051/5925
BP	GO:0002483	antigen processing and presentation of endogenous peptide antigen	18	0.64655	1.8813	0.00134514	0.0344177	0.0294374	466	tags=39%, list=4%, signal=38%	6892/3133/3106/3105/3135/3107/3134
[truncated: 85 more rows]

## Sheet: MAP3K3_KEGG
ID	Description	setSize	enrichmentScore	NES	pvalue	p.adjust	qvalue	rank	leading_edge	core_enrichment
hsa03010	Ribosome	113	-0.552777	-2.71756	1e-10	3.33e-08	2.14737e-08	1613	tags=43%, list=12%, signal=38%	51373/51023/9801/9349/6193/6125/29093/6206/6223/6142/6128/55052/6208/6187/6189/11224/6191/6155/6138/28998/6129/6170/6146/29074/6228/6169/6165/6229/6167/6133/6166/6188/11222/6130/6160/6157/6205/51065/6233/6235/6164/9553/6230/6210/6227/51121/51187/9045/6152
[truncated: 83 more rows]
